# Supplementary material for: Drosophila SWR1 and NuA4 complexes are defined by DOMINO isoforms
Source: bioRxiv preprint, doi:10.1101/2020.02.10.939793, version 1 (2020-02-10)
Supplement: Supplementary Table 2 [file 939793_file07.xlsx]

## Sheet: res.DomA-Control
	baseMean	log2FoldChange	lfcSE	stat	pvalue	padj	chr	symbol
FBgn0086355	1799.2	-2.79461	0.146568	-19.067	4.74468e-81	4.8633e-77	3R	Tpi
FBgn0014869	1453.56	-1.49522	0.0933312	-16.0206	9.17853e-58	4.704e-54	3R	Pglym78
FBgn0283536	1265.35	-1.41107	0.089617	-15.7456	7.3667e-56	2.51696e-52	3R	Vha13
FBgn0053460	554.794	6.51503	0.423739	15.3751	2.40478e-53	6.16226e-50	2R	CG33460
FBgn0028990	335.51	2.81346	0.19201	14.6526	1.29574e-48	2.65627e-45	2L	Spn27A
FBgn0035083	1878.16	-2.47029	0.174757	-14.1356	2.29149e-45	3.91463e-42	2R	Tina-1
FBgn0034935	327.115	-2.80978	0.199098	-14.1125	3.17959e-45	4.65583e-42	2R	Orcokinin
FBgn0039827	534.969	-3.07137	0.223224	-13.7591	4.49052e-43	5.75348e-40	3R	CG1544
FBgn0051211	1254.25	-1.33246	0.0990459	-13.453	2.95744e-41	3.3682e-38	3R	CG31211
FBgn0030653	136.402	-4.20749	0.315866	-13.3205	1.75926e-40	1.80324e-37	X	CG7860
FBgn0037135	4659.83	-1.30469	0.0998887	-13.0614	5.46861e-39	5.09575e-36	3L	CG7414
FBgn0002868	1400.91	-5.06464	0.390655	-12.9645	1.94508e-38	1.66142e-35	3R	MtnA
FBgn0038683	853.701	-1.44451	0.111611	-12.9424	2.59556e-38	2.0465e-35	3R	CG11779
FBgn0038271	4171.77	-1.51541	0.118401	-12.799	1.6616e-37	1.21653e-34	3R	UQCR-C1
FBgn0010549	328.994	-3.88848	0.3091	-12.58	2.72008e-36	1.85872e-33	2R	l(2)03659
FBgn0000346	718.167	1.6742	0.133333	12.5566	3.65826e-36	2.34357e-33	X	comt
FBgn0035085	412.476	-2.52574	0.201683	-12.5233	5.56931e-36	3.35796e-33	2R	CG3770
FBgn0038612	2529.01	-2.26129	0.18073	-12.512	6.42074e-36	3.65625e-33	3R	cona
FBgn0032129	358.007	4.79983	0.386022	12.4341	1.7064e-35	9.2056e-33	2L	jp
FBgn0033926	36599.6	1.57067	0.128297	12.2425	1.8437e-34	9.44897e-32	2R	Arc1
FBgn0028331	1898.73	-1.69169	0.139325	-12.142	6.3239e-34	3.08667e-31	X	l(1)G0289
FBgn0053465	222.765	6.85148	0.564894	12.1288	7.43311e-34	3.46315e-31	2R	CG33465
FBgn0027885	2886.44	-1.55642	0.128809	-12.0831	1.29664e-33	5.74437e-31	2L	NA
FBgn0003076	2410.14	-2.61551	0.216513	-12.0801	1.34502e-33	5.74437e-31	3L	Pgm1
FBgn0263240	522.371	-1.74502	0.146492	-11.912	1.02432e-32	4.19972e-30	2R	Coop
FBgn0050147	355.351	-1.82892	0.154081	-11.8698	1.69786e-32	6.69347e-30	2R	Hil
FBgn0262366	161.319	2.64948	0.224038	11.826	2.86361e-32	1.08711e-29	3L	CG43064
FBgn0013981	3872.66	-1.39693	0.118945	-11.7444	7.54702e-32	2.76275e-29	3R	His4r
FBgn0052432	237.942	1.86936	0.160264	11.6643	1.94067e-31	6.85928e-29	3L	CG32432
FBgn0023537	2721.89	-1.57408	0.135573	-11.6106	3.63967e-31	1.24355e-28	X	CG17896
FBgn0035770	1746.77	-1.28752	0.111328	-11.5651	6.19223e-31	2.04743e-28	3L	pst
FBgn0051453	886.704	-1.27951	0.111093	-11.5175	1.07751e-30	3.45139e-28	3R	pch2
FBgn0032393	3100.89	-1.35599	0.118506	-11.4423	2.56865e-30	7.97837e-28	2L	Nfs1
FBgn0263353	356.47	-2.28173	0.201532	-11.3219	1.02181e-29	3.08045e-27	3R	CG11000
FBgn0040813	2909.9	5.36119	0.474444	11.2999	1.31329e-29	3.84606e-27	3L	Nplp2
FBgn0015777	608.54	-2.31791	0.205822	-11.2617	2.02798e-29	5.77411e-27	2L	nrv2
FBgn0031322	275.211	3.38822	0.301076	11.2537	2.22078e-29	6.15216e-27	2L	CG5001
FBgn0053784	2004.15	2.00131	0.179893	11.125	9.48091e-29	2.55735e-26	3R	CG33784
FBgn0053138	1040.42	-1.51788	0.136624	-11.1099	1.1228e-28	2.95094e-26	2R	AGBE
FBgn0028424	825.193	-2.48401	0.223788	-11.0999	1.25646e-28	3.16585e-26	2R	JhI-26
FBgn0050046	1544.92	3.03122	0.273103	11.0992	1.26634e-28	3.16585e-26	2R	CG30046
FBgn0082585	656.37	-2.43914	0.222633	-10.9559	6.22672e-28	1.51962e-25	2R	sprt
FBgn0043458	4111.32	1.9614	0.179476	10.9285	8.42499e-28	2.00828e-25	3L	CG12084
FBgn0002926	154.316	-3.04584	0.279821	-10.885	1.35931e-27	3.16658e-25	3L	ndl
FBgn0027611	104.483	3.12847	0.288859	10.8304	2.46991e-27	5.6259e-25	2L	LManII
FBgn0267376	1583.92	1.52627	0.141308	10.801	3.40436e-27	7.5858e-25	3R	SelR
FBgn0038832	156.691	5.72104	0.531033	10.7734	4.59696e-27	1.00253e-24	3R	CG15695
FBgn0250906	2479.53	-1.15439	0.107302	-10.7583	5.4139e-27	1.15609e-24	2L	Pgk
FBgn0004797	385.166	1.77439	0.165601	10.7148	8.67134e-27	1.8139e-24	2L	mdy
FBgn0001091	2978.22	-1.3447	0.12556	-10.7096	9.1742e-27	1.88071e-24	2R	Gapdh1
FBgn0031002	188.02	4.90995	0.462233	10.6222	2.34852e-26	4.72007e-24	X	CG14196
FBgn0027616	1396.4	-1.26233	0.119067	-10.6018	2.92207e-26	5.75985e-24	3L	Ythdc1
FBgn0031069	1209.4	1.77234	0.16793	10.554	4.86536e-26	9.40943e-24	X	Pmp70
FBgn0063491	382.011	-2.88387	0.275351	-10.4735	1.14388e-25	2.17125e-23	2R	GstE9
FBgn0033725	275.979	2.82235	0.270049	10.4513	1.44605e-25	2.6949e-23	2R	Cpr49Ac
FBgn0036551	83.5391	3.53237	0.338824	10.4254	1.89905e-25	3.47593e-23	3L	CG17029
FBgn0037290	133.095	3.41238	0.327651	10.4147	2.12543e-25	3.82205e-23	3R	CG1124
FBgn0039883	207.009	-2.31297	0.222497	-10.3955	2.5993e-25	4.5936e-23	3R	RhoGAP100F
FBgn0053516	328.939	3.65682	0.351914	10.3912	2.71857e-25	4.72293e-23	2L	dpr3
FBgn0033845	1540	-1.38813	0.13492	-10.2885	7.94215e-25	1.35678e-22	2R	mars
FBgn0036862	154.928	-2.86488	0.27954	-10.2485	1.20145e-24	2.01883e-22	3L	Gbs-76A
FBgn0031547	176.506	4.8988	0.478123	10.2459	1.23482e-24	2.04143e-22	2L	Sr-CIV
FBgn0030662	211.608	-2.48745	0.242849	-10.2428	1.27518e-24	2.0747e-22	X	CG9220
FBgn0003074	2312.89	-1.39748	0.136492	-10.2386	1.33201e-24	2.13329e-22	2R	Pgi
FBgn0010246	5412.26	1.42969	0.139908	10.2188	1.634e-24	2.57669e-22	3L	Myo61F
FBgn0050022	1491.35	-2.8443	0.279174	-10.1883	2.23753e-24	3.47496e-22	2R	CG30022
FBgn0051522	531.974	-1.44465	0.141997	-10.1738	2.59596e-24	3.97143e-22	3R	CG31522
FBgn0038326	1596.53	-0.877332	0.0865577	-10.1358	3.83208e-24	5.7763e-22	3R	CG5044
FBgn0029974	517.259	2.42611	0.240657	10.0812	6.68968e-24	9.93757e-22	X	dpr14
FBgn0005671	2841.81	-0.902958	0.0896053	-10.0771	6.97776e-24	1.02174e-21	3R	Vha55
FBgn0029922	557.966	-2.95829	0.294108	-10.0585	8.42616e-24	1.21645e-21	X	CG14431
FBgn0037891	1737.36	-1.02432	0.102018	-10.0406	1.01036e-23	1.43836e-21	3R	CG5214
FBgn0034530	117.092	-2.5403	0.253294	-10.0291	1.13595e-23	1.59499e-21	2R	Rcd6
FBgn0032233	215.217	-1.89299	0.189632	-9.98243	1.81962e-23	2.52042e-21	2L	dpr19
FBgn0029801	995.597	-1.81034	0.181393	-9.98022	1.86062e-23	2.54285e-21	X	CG15771
FBgn0031317	1142.1	1.03316	0.103543	9.97815	1.89978e-23	2.56221e-21	2L	Charon
FBgn0035847	150.879	-2.68261	0.269403	-9.95762	2.33597e-23	3.10957e-21	3L	mthl7
FBgn0037754	329.745	-2.61512	0.263053	-9.94142	2.74878e-23	3.61218e-21	3R	CG8500
FBgn0033062	1859.87	-1.01169	0.102066	-9.91218	3.68513e-23	4.78134e-21	2R	Ars2
FBgn0051673	675.87	-1.30261	0.131958	-9.87143	5.53713e-23	7.09445e-21	2L	CG31673
FBgn0025463	1150.84	-0.971507	0.0992951	-9.78404	1.31843e-22	1.66839e-20	X	Bap60
FBgn0033431	467.503	-2.66089	0.272343	-9.77037	1.50903e-22	1.88629e-20	2R	CG1827
FBgn0003997	145.146	3.03058	0.311482	9.72954	2.25607e-22	2.78611e-20	3L	hid
FBgn0033421	477.896	-1.75923	0.180916	-9.72402	2.38189e-22	2.90647e-20	2R	CG1888
FBgn0024556	2554.99	-0.842021	0.0869873	-9.67981	3.67393e-22	4.43033e-20	2R	mEFTu1
FBgn0041105	1216.08	2.14812	0.22215	9.66968	4.05664e-22	4.83495e-20	3R	nerfin-2
FBgn0038038	158.606	-2.22109	0.229965	-9.65838	4.52962e-22	5.33662e-20	3R	Sccpdh2
FBgn0033717	3974.81	1.6059	0.166474	9.64659	5.08154e-22	5.91884e-20	2R	CG8839
FBgn0027945	446.304	-1.10116	0.115228	-9.55635	1.21979e-21	1.40482e-19	3L	ppl
FBgn0263873	672.657	1.88443	0.197969	9.51883	1.75138e-21	1.99462e-19	2L	sick
FBgn0036622	235.253	-1.775	0.186795	-9.50238	2.05145e-21	2.3107e-19	3L	Agpat4
FBgn0000053	608.621	-2.25179	0.237131	-9.49595	2.18204e-21	2.43108e-19	2L	Gart
FBgn0032613	109.891	5.71249	0.606318	9.42161	4.4422e-21	4.89598e-19	2L	Nepl9
FBgn0039593	191.85	4.64509	0.495281	9.3787	6.67895e-21	7.28289e-19	3R	Sid
FBgn0037386	53.6146	5.63129	0.600729	9.37409	6.97739e-21	7.52823e-19	3R	CG1208
FBgn0031307	6483.42	-1.91557	0.205034	-9.34268	9.39224e-21	1.00282e-18	2L	MFS3
FBgn0250788	7608.6	-1.26697	0.135637	-9.34087	9.55454e-21	1.00963e-18	X	beta-Spec
FBgn0263077	1556	2.43921	0.261326	9.334	1.01945e-20	1.06626e-18	2R	CG43340
FBgn0031914	81.7303	2.80722	0.300806	9.33234	1.03562e-20	1.07224e-18	2L	CG5973
FBgn0035099	991.385	-1.059	0.113515	-9.32915	1.0672e-20	1.09388e-18	3L	CG6845
FBgn0030747	587.505	1.82043	0.19547	9.3131	1.24154e-20	1.25998e-18	X	CG4301
FBgn0034618	881.68	-1.5564	0.16752	-9.29085	1.53061e-20	1.53812e-18	2R	CG9485
FBgn0028856	1202.59	1.57985	0.170447	9.26887	1.88135e-20	1.87222e-18	2L	CG18063
FBgn0262473	346.162	3.1976	0.345351	9.25896	2.06434e-20	2.03457e-18	3R	Tl
FBgn0013763	6265.89	1.90903	0.207346	9.20698	3.35422e-20	3.27436e-18	2R	Idgf6
FBgn0033872	104.967	-2.80291	0.304908	-9.19265	3.83275e-20	3.70619e-18	2R	CG6329
FBgn0038881	151.738	-2.60649	0.284101	-9.17451	4.53642e-20	4.34564e-18	3R	CG16791
FBgn0031048	1225.3	-0.905184	0.0986926	-9.17175	4.65409e-20	4.41707e-18	X	CG12237
FBgn0034390	820.344	-1.64513	0.179623	-9.15879	5.24821e-20	4.93525e-18	2R	CG15093
FBgn0052280	924.392	-1.59458	0.174542	-9.1358	6.49252e-20	6.04985e-18	3L	CG32280
FBgn0285910	1260.12	-0.810868	0.0889944	-9.11146	8.12823e-20	7.5058e-18	X	VhaAC39-1
FBgn0262559	1638.57	-1.37975	0.152183	-9.06637	1.23044e-19	1.12607e-17	3R	Mdh2
FBgn0039494	838.401	-1.84534	0.20393	-9.0489	1.44421e-19	1.31002e-17	3R	grass
FBgn0014427	82.4051	-2.84273	0.314591	-9.03627	1.62112e-19	1.45759e-17	3R	CG11899
FBgn0035623	289.55	7.34294	0.814062	9.02013	1.87873e-19	1.67452e-17	3L	mthl2
FBgn0032221	192.877	1.64637	0.182662	9.01325	2.00038e-19	1.76758e-17	2L	Schip1
FBgn0032729	685.741	-1.42042	0.157708	-9.00664	2.1247e-19	1.86139e-17	2L	L2HGDH
FBgn0262656	8184.58	1.88807	0.209792	8.99975	2.26232e-19	1.96515e-17	X	Myc
FBgn0050410	695.421	-1.03802	0.115627	-8.97732	2.7745e-19	2.3898e-17	2R	Rpi
FBgn0052703	559.429	-1.83856	0.20483	-8.97605	2.80671e-19	2.3974e-17	X	Erk7
FBgn0000139	535.658	-1.11218	0.124175	-8.95656	3.34959e-19	2.83746e-17	3R	ash2
FBgn0250786	1534.37	-1.04838	0.117472	-8.9245	4.47706e-19	3.76146e-17	2L	Chd1
FBgn0035761	637.278	-1.22157	0.13747	-8.88606	6.33167e-19	5.27639e-17	3L	RhoGEF4
FBgn0034605	446.675	2.40703	0.271029	8.88109	6.62107e-19	5.47306e-17	2R	Ugt49C1
FBgn0011676	106.683	-3.26518	0.367849	-8.87642	6.90448e-19	5.66167e-17	2L	Nos
FBgn0020445	53.4651	2.76933	0.31351	8.83329	1.01638e-18	8.26814e-17	2L	E23
FBgn0264895	623.328	3.14622	0.356231	8.83198	1.02841e-18	8.30016e-17	2L	RapGAP1
FBgn0085360	34.1578	4.7749	0.540733	8.83044	1.04269e-18	8.34969e-17	X	CG34331
FBgn0085376	172.238	-2.76269	0.312916	-8.82886	1.0575e-18	8.40263e-17	3R	CG34347
FBgn0033079	571.611	-1.45631	0.164997	-8.82628	1.08213e-18	8.5322e-17	2R	Fmo-2
FBgn0042110	61.3512	3.89354	0.441598	8.81693	1.17638e-18	9.2045e-17	3R	CG18765
FBgn0031389	3237.85	3.11093	0.353603	8.79781	1.39511e-18	1.08332e-16	2L	CG4259
FBgn0028327	3849.37	-1.07293	0.122001	-8.79446	1.43733e-18	1.10772e-16	X	l(1)G0320
FBgn0026409	4772.06	-1.20274	0.136799	-8.79202	1.46901e-18	1.12368e-16	3L	Mpcp2
FBgn0031589	1384.11	-1.45388	0.165517	-8.78386	1.57964e-18	1.19936e-16	2L	Naprt
FBgn0051637	1025.41	2.32819	0.265287	8.77609	1.69249e-18	1.27559e-16	2L	CG31637
FBgn0033627	269.1	-1.26373	0.144115	-8.7689	1.80413e-18	1.34981e-16	2R	CG13204
FBgn0023477	2077.6	-1.03564	0.118609	-8.73156	2.51191e-18	1.86573e-16	2R	Taldo
FBgn0262587	1689.58	2.48912	0.285596	8.71553	2.89395e-18	2.13403e-16	3R	CG43124
FBgn0261573	1442.95	-1.10208	0.126812	-8.69061	3.60484e-18	2.63926e-16	X	CoRest
FBgn0028484	1062.7	-1.69034	0.194748	-8.67963	3.97057e-18	2.88641e-16	3L	Ack
FBgn0259228	2516.3	1.67911	0.193717	8.66785	4.40366e-18	3.1787e-16	X	C3G
FBgn0052088	534.943	-3.08872	0.35642	-8.66598	4.47652e-18	3.2087e-16	3L	sunn
FBgn0033367	70.3934	7.61767	0.879342	8.66293	4.59809e-18	3.27294e-16	2R	PPO2
FBgn0283494	1217.34	-1.18317	0.136667	-8.6573	4.83052e-18	3.41468e-16	2R	Adk2
FBgn0267693	149.303	-2.33398	0.269797	-8.65089	5.11004e-18	3.58753e-16	3R	asRNA:CR46029
FBgn0004885	73.7719	2.88489	0.333808	8.64236	5.50656e-18	3.8396e-16	3R	tok
FBgn0267635	2072.89	1.80038	0.208647	8.62886	6.19653e-18	4.29152e-16	3L	lncRNA:CR45973
FBgn0036486	2266.55	-1.4183	0.164757	-8.60849	7.40314e-18	5.09277e-16	3L	Msh6
FBgn0086370	1274.86	1.86031	0.216545	8.59087	8.63164e-18	5.89829e-16	3R	sra
FBgn0250837	5139.22	-1.28252	0.149374	-8.58599	9.00569e-18	6.11314e-16	2L	dUTPase
FBgn0035515	628.12	-1.19905	0.139702	-8.58295	9.24678e-18	6.23549e-16	3L	CG14997
FBgn0033902	6960.34	-1.10075	0.128349	-8.57618	9.80748e-18	6.57037e-16	2R	eIF3m
FBgn0024150	31.2592	4.89258	0.57057	8.5749	9.91758e-18	6.60098e-16	3L	Ac78C
FBgn0038742	1197.04	-0.862196	0.100709	-8.56129	1.11608e-17	7.38051e-16	3R	Arc42
FBgn0004507	1832.1	-1.07582	0.125911	-8.54428	1.29341e-17	8.49834e-16	2L	GlyP
FBgn0027601	579.513	1.16418	0.136311	8.54059	1.33543e-17	8.71855e-16	X	pdgy
FBgn0033033	359.699	2.45804	0.288643	8.51586	1.65362e-17	1.06954e-15	2R	scaf
FBgn0005427	719.536	-1.16666	0.137004	-8.51548	1.65908e-17	1.06954e-15	X	ewg
FBgn0024841	272.156	-2.02622	0.238692	-8.48883	2.0872e-17	1.33711e-15	3R	Pcd
FBgn0012037	3923.29	2.31151	0.272562	8.48066	2.23916e-17	1.42555e-15	2L	Ance
FBgn0085370	2210.43	1.07959	0.128153	8.42423	3.63138e-17	2.29763e-15	2L	Pde11
FBgn0014857	2309.83	-1.21638	0.144498	-8.41796	3.83109e-17	2.40912e-15	2L	His3.3A
FBgn0035084	121.91	-1.93483	0.22998	-8.41306	3.99459e-17	2.49662e-15	2R	CG15861
FBgn0039130	1064.97	-1.11936	0.133612	-8.3777	5.39711e-17	3.35275e-15	3R	CG5854
FBgn0058470	849.227	1.8957	0.226495	8.36973	5.77506e-17	3.56592e-15	3L	CG40470
FBgn0051072	492.732	-1.26266	0.150878	-8.36874	5.82397e-17	3.5746e-15	3R	Lerp
FBgn0263832	1731.51	-1.35783	0.162584	-8.35152	6.7388e-17	4.11147e-15	3L	Rcd5
FBgn0040271	1972.6	2.83188	0.339386	8.34411	7.17503e-17	4.35172e-15	3R	Sulf1
FBgn0030746	253.237	2.44996	0.295114	8.30174	1.02599e-16	6.18612e-15	X	CG9981
FBgn0035767	229.415	-1.73508	0.209202	-8.29378	1.0971e-16	6.57617e-15	3L	Cln7
FBgn0024236	4423.52	1.10259	0.133447	8.26234	1.42841e-16	8.51231e-15	3L	foi
FBgn0029930	69.4758	3.9382	0.478	8.2389	1.73807e-16	1.02978e-14	X	CG12541
FBgn0030519	257.651	-1.56178	0.190188	-8.21176	2.17977e-16	1.28406e-14	X	CG11151
FBgn0037010	976.255	-1.03033	0.125732	-8.19465	2.51317e-16	1.472e-14	3L	CG4825
FBgn0031020	3338.49	-0.721005	0.088017	-8.19166	2.5764e-16	1.50046e-14	X	Naa15-16
FBgn0262511	1987.73	-0.721629	0.0881708	-8.18444	2.73576e-16	1.58427e-14	2R	Vha44
FBgn0037536	1180.52	-1.11432	0.136251	-8.17844	2.87537e-16	1.65576e-14	3R	CG2698
FBgn0002031	5521.85	-1.03216	0.126691	-8.14709	3.72797e-16	2.13473e-14	2L	l(2)37Cc
FBgn0031969	1877.95	1.40665	0.172703	8.14492	3.79545e-16	2.14936e-14	2L	pes
FBgn0037852	1773.75	-1.1906	0.14617	-8.14535	3.78185e-16	2.14936e-14	3R	Tpc1
FBgn0040985	1842.57	-1.0668	0.131	-8.14353	3.83906e-16	2.16211e-14	2L	CG6115
FBgn0263598	2565.42	-0.933914	0.114766	-8.13752	4.0345e-16	2.25976e-14	2L	Vha68-2
FBgn0035936	90.5896	3.96464	0.487633	8.13038	4.27954e-16	2.38398e-14	3L	Tsp66E
FBgn0001316	4463.87	0.746052	0.0919026	8.11786	4.74476e-16	2.62885e-14	3L	klar
FBgn0039633	2071.21	1.3033	0.160601	8.11514	4.85209e-16	2.67386e-14	3R	CG11873
FBgn0265376	44.2601	5.5197	0.682037	8.09296	5.82335e-16	3.19194e-14	3R	lncRNA:CR44317
FBgn0052099	273.383	1.7056	0.211354	8.06988	7.03668e-16	3.83649e-14	3L	CG32099
FBgn0264982	64.1472	2.48494	0.308027	8.06728	7.18816e-16	3.89834e-14	3R	lncRNA:CR44133
FBgn0035533	3835.82	1.75105	0.217182	8.06259	7.46963e-16	4.02967e-14	3L	Cip4
FBgn0040212	830.043	0.920787	0.114321	8.05437	7.98908e-16	4.28733e-14	3R	Dhap-at
FBgn0035359	161.553	-2.23404	0.277687	-8.04516	8.61346e-16	4.59833e-14	3L	CG1143
FBgn0036136	803.297	-0.779072	0.0968901	-8.04079	8.92639e-16	4.7407e-14	3L	Ufd1-like
FBgn0003884	23465.7	-1.03854	0.129182	-8.03936	9.03054e-16	4.77129e-14	3R	alphaTub84B
FBgn0037330	377.579	-0.955498	0.118943	-8.03326	9.49199e-16	4.96392e-14	3R	mRpL44
FBgn0266044	191.256	3.41438	0.425012	8.03359	9.46617e-16	4.96392e-14	2L	lncRNA:CR44809
FBgn0038922	1142.62	-0.813443	0.101508	-8.01355	1.1144e-15	5.79826e-14	3R	Idh3b
FBgn0034368	3532.67	0.785855	0.0982716	7.99676	1.27731e-15	6.61236e-14	2R	zda
FBgn0284243	13073	-1.03236	0.129557	-7.96839	1.6075e-15	8.27985e-14	2R	betaTub56D
FBgn0039674	370.082	-1.07419	0.135097	-7.95123	1.84673e-15	9.46451e-14	3R	CG1907
FBgn0002905	644.403	-1.18784	0.149413	-7.95007	1.86401e-15	9.50553e-14	3R	mus308
FBgn0030093	1820.3	-1.06907	0.134523	-7.94706	1.90987e-15	9.6912e-14	X	Bap111
FBgn0037513	135.1	-2.33907	0.294609	-7.93957	2.02881e-15	1.0244e-13	3R	pyd3
FBgn0037659	1891.41	-0.75797	0.0955332	-7.9341	2.12021e-15	1.06314e-13	3R	Kdm2
FBgn0038353	141.541	2.97446	0.374913	7.93375	2.12627e-15	1.06314e-13	3R	CG5399
FBgn0025641	501.2	2.2491	0.283877	7.92279	2.32244e-15	1.15558e-13	X	DAAM
FBgn0069969	152.403	1.69667	0.214407	7.9133	2.50645e-15	1.24112e-13	2R	CG40498
FBgn0050414	148.757	-2.14273	0.271645	-7.88797	3.0713e-15	1.5135e-13	2R	CG30414
FBgn0036173	625.954	-0.941728	0.119397	-7.88734	3.08689e-15	1.51391e-13	3L	CG7394
FBgn0266711	533.638	-1.03844	0.131809	-7.87841	3.31583e-15	1.61844e-13	2R	EloC
FBgn0034139	328.795	2.61868	0.332898	7.86632	3.65217e-15	1.77416e-13	2R	CG4927
FBgn0040396	562.222	-1.49165	0.189843	-7.85728	3.9256e-15	1.89799e-13	X	CG3939
FBgn0031660	628.517	-0.891375	0.113512	-7.85267	4.07276e-15	1.9599e-13	2L	mRpL28
FBgn0000036	1213.77	1.80458	0.229855	7.85096	4.12851e-15	1.97744e-13	3R	nAChRalpha1
FBgn0033635	59.9442	5.88559	0.753206	7.81405	5.53778e-15	2.6401e-13	2R	Prip
FBgn0265611	129.232	1.96132	0.2512	7.80782	5.81845e-15	2.76107e-13	X	asRNA:CR44429
FBgn0034628	264.679	-1.12208	0.143739	-7.80641	5.88401e-15	2.77931e-13	2R	Acox57D-p
FBgn0032535	118.551	2.2689	0.290924	7.79894	6.24295e-15	2.93533e-13	2L	Ance-2
FBgn0266745	29.2501	-3.67691	0.472471	-7.78229	7.12242e-15	3.33355e-13	3R	CG45218
FBgn0038735	317.946	-1.40354	0.180439	-7.77846	7.34111e-15	3.42029e-13	3R	CG4662
FBgn0025373	2006.52	-2.04472	0.262948	-7.77614	7.47685e-15	3.45215e-13	2R	Fpps
FBgn0014135	2680.62	1.315	0.169103	7.77636	7.46429e-15	3.45215e-13	3R	bnl
FBgn0015577	110.439	2.58819	0.333189	7.76795	7.97667e-15	3.66641e-13	3R	alpha-Est9
FBgn0034793	931.253	-1.00247	0.129281	-7.75418	8.8914e-15	4.06861e-13	2R	asrij
FBgn0036752	4632.96	2.66472	0.344504	7.73496	1.03438e-14	4.71217e-13	3L	Adgf-A
FBgn0039129	955.575	-1.46932	0.189977	-7.73421	1.04046e-14	4.71892e-13	3R	RpS19b
FBgn0027844	81.6373	3.35661	0.434061	7.73303	1.05013e-14	4.74176e-13	2L	CAH1
FBgn0034938	353.051	-1.33839	0.173247	-7.72533	1.11567e-14	5.01561e-13	2R	CG3803
FBgn0020908	66.2663	2.29045	0.296684	7.72017	1.16174e-14	5.19995e-13	2R	Scp1
FBgn0010213	1023.47	-0.840145	0.108907	-7.71434	1.21613e-14	5.41969e-13	2R	Sod2
FBgn0031374	2229.84	1.76959	0.229442	7.7126	1.23278e-14	5.47014e-13	2L	Wdr62
FBgn0004635	948.696	2.29813	0.298084	7.70968	1.26134e-14	5.57273e-13	3L	rho
FBgn0262588	616.018	2.85334	0.370939	7.69221	1.44616e-14	6.36184e-13	3R	CG43125
FBgn0028425	1691.55	-1.06761	0.138838	-7.6896	1.47599e-14	6.46533e-13	2L	JhI-21
FBgn0011706	73.7223	3.13582	0.408048	7.68493	1.53077e-14	6.67677e-13	3L	rpr
FBgn0002543	71.7023	3.61515	0.470857	7.67782	1.61821e-14	7.02822e-13	2L	robo2
FBgn0261938	1007.61	-1.10914	0.144492	-7.67612	1.63981e-14	7.09199e-13	2L	mtRNApol
FBgn0033340	393.076	-1.37371	0.179489	-7.65346	1.95638e-14	8.42558e-13	2R	CG13751
FBgn0034221	177.976	2.56364	0.335266	7.6466	2.06363e-14	8.85031e-13	2R	CG10764
FBgn0285991	4691.39	-1.12085	0.146676	-7.64166	2.14438e-14	9.1583e-13	2L	hpRNA:CR18854
FBgn0041094	6849.88	1.20587	0.158071	7.62865	2.37227e-14	1.00895e-12	3L	scyl
FBgn0024179	79.2345	1.88532	0.247358	7.62186	2.50053e-14	1.05911e-12	3L	wit
FBgn0030575	31.852	4.96627	0.652047	7.61642	2.60799e-14	1.10008e-12	X	CG5321
FBgn0002566	3296.25	1.26726	0.166424	7.61465	2.64401e-14	1.1107e-12	2L	lt
FBgn0050499	640.569	-1.04145	0.13694	-7.60513	2.8461e-14	1.19071e-12	2R	Rpe
FBgn0003891	3681.02	-0.765326	0.100685	-7.60122	2.93357e-14	1.22232e-12	2R	tud
FBgn0030089	1648.44	-0.737251	0.0970567	-7.59609	3.0522e-14	1.2666e-12	X	AP-1gamma
FBgn0032085	107.175	3.75718	0.494919	7.5915	3.16221e-14	1.30696e-12	2L	CG9555
FBgn0283500	1783.22	-0.772341	0.101826	-7.58488	3.32801e-14	1.36996e-12	3L	Sac1
FBgn0036740	596.593	-1.20836	0.159352	-7.58295	3.37775e-14	1.38488e-12	3L	Vps60
FBgn0033716	286.582	-1.02826	0.135894	-7.56665	3.82979e-14	1.56396e-12	2R	Den1
FBgn0010317	380.813	-1.4808	0.195873	-7.55996	4.03179e-14	1.63991e-12	3L	CycJ
FBgn0259175	1015.6	1.16018	0.153643	7.55114	4.31476e-14	1.74807e-12	3L	ome
FBgn0032935	168.287	1.65543	0.219261	7.55005	4.351e-14	1.75582e-12	2L	Atg18b
FBgn0030151	1800.3	-0.79391	0.105231	-7.54443	4.54259e-14	1.82594e-12	X	CG1354
FBgn0036134	1580.93	-0.741015	0.0984492	-7.52687	5.197e-14	2.08083e-12	3L	FoxK
FBgn0034858	1392.53	-1.04118	0.138404	-7.52279	5.36198e-14	2.13853e-12	2R	eIF2Bdelta
FBgn0031878	1887.72	-1.11542	0.148739	-7.49919	6.42153e-14	2.55119e-12	2L	sip2
FBgn0043025	175.157	2.33119	0.310943	7.49717	6.52085e-14	2.58064e-12	3L	Adgf-A2
FBgn0033183	1826.11	-0.795047	0.106152	-7.48969	6.90371e-14	2.72166e-12	2R	CG1620
FBgn0261439	1735.61	-0.881876	0.117755	-7.48909	6.93554e-14	2.72373e-12	2R	SdhA
FBgn0261987	6913.86	-1.51158	0.202001	-7.48302	7.2634e-14	2.8416e-12	3R	Pxt
FBgn0261089	134.507	5.42309	0.724905	7.4811	7.37038e-14	2.87249e-12	2L	Sytalpha
FBgn0053459	51.0382	4.34788	0.581554	7.47632	7.64347e-14	2.96763e-12	2R	CG33459
FBgn0046685	948.507	-1.82665	0.244402	-7.47396	7.78145e-14	3.00587e-12	3R	Wsck
FBgn0033204	73.6742	3.0786	0.411928	7.47364	7.80061e-14	3.00587e-12	2R	CG2065
FBgn0039590	764.551	1.74082	0.233207	7.46469	8.34929e-14	3.20525e-12	3R	CG10011
FBgn0260632	736.693	1.91968	0.257797	7.44646	9.58756e-14	3.66688e-12	2L	dl
FBgn0028833	1387.33	-0.890833	0.119667	-7.44429	9.747e-14	3.714e-12	3R	Dak1
FBgn0033777	1514.64	1.43603	0.192924	7.44348	9.80648e-14	3.72283e-12	2R	CG17574
FBgn0262512	587.68	-1.17012	0.157516	-7.42859	1.09758e-13	4.15137e-12	2R	Vha14-1
FBgn0033469	304.874	3.12023	0.420829	7.41449	1.22097e-13	4.60107e-12	2R	CG12133
FBgn0011817	446.754	2.50204	0.337531	7.41277	1.23685e-13	4.64383e-12	3L	nmo
FBgn0034543	333.146	-1.08795	0.146785	-7.41186	1.24538e-13	4.65883e-12	2R	galla-1
FBgn0033494	104.17	3.49196	0.471707	7.40281	1.33329e-13	4.96955e-12	2R	KCNQ
FBgn0003475	1988.19	2.76621	0.374686	7.38274	1.55065e-13	5.75874e-12	2L	spir
FBgn0004118	631.102	-1.06307	0.144028	-7.381	1.57106e-13	5.8135e-12	3R	nAChRbeta2
FBgn0038149	451.232	-1.68601	0.228611	-7.37502	1.64322e-13	6.05865e-12	3R	GILT1
FBgn0035692	648.801	-0.731482	0.0993954	-7.35931	1.84859e-13	6.79141e-12	3L	Sf3b6
FBgn0038912	639.161	1.59701	0.217092	7.35638	1.88971e-13	6.91768e-12	3R	CG6656
FBgn0034194	233.328	2.45295	0.333523	7.35468	1.91389e-13	6.93193e-12	2R	CG15611
FBgn0026573	976.547	-0.895164	0.121708	-7.355	1.90933e-13	6.93193e-12	2R	ADD1
FBgn0040099	72.4464	4.74059	0.644538	7.35502	1.90903e-13	6.93193e-12	2L	lectin-28C
FBgn0027500	1002.29	-1.07804	0.146764	-7.34535	2.05215e-13	7.40654e-12	3L	spd-2
FBgn0027073	906.22	1.65626	0.226446	7.31415	2.59024e-13	9.31578e-12	2R	Ugt49B1
FBgn0037744	546.812	-0.853133	0.116729	-7.30864	2.69867e-13	9.67179e-12	3R	NA
FBgn0038909	317.19	3.01513	0.412777	7.30449	2.78323e-13	9.94012e-12	3R	CG6569
FBgn0026375	1266.53	-0.675403	0.0924727	-7.30381	2.79729e-13	9.95563e-12	X	RhoGAPp190
FBgn0042104	87.6709	2.37532	0.325342	7.30099	2.85655e-13	1.01314e-11	3R	CG18747
FBgn0021795	1967.37	-1.07557	0.147775	-7.27845	3.37669e-13	1.19349e-11	2R	Tapdelta
FBgn0000018	679.008	1.25173	0.172068	7.27461	3.47435e-13	1.21959e-11	2L	abo
FBgn0040319	2895.05	1.00924	0.138734	7.27467	3.47271e-13	1.21959e-11	X	Gclc
FBgn0003256	683.176	0.94182	0.129574	7.26857	3.63315e-13	1.27098e-11	2R	rl
FBgn0028430	866.96	2.32006	0.319288	7.26635	3.6932e-13	1.2876e-11	2L	He
FBgn0038546	725.287	-1.05233	0.144991	-7.25787	3.93228e-13	1.3663e-11	3R	CG7379
FBgn0038682	165.385	3.14474	0.43334	7.25698	3.95831e-13	1.3707e-11	3R	CG5835
FBgn0039844	110.217	2.10409	0.290176	7.2511	4.13395e-13	1.4267e-11	3R	CG1607
FBgn0004584	2195.3	-0.844849	0.116604	-7.24547	4.30955e-13	1.48231e-11	2L	Rrp1
FBgn0051710	351.439	1.31321	0.181361	7.24085	4.45882e-13	1.52343e-11	2L	CG31710
FBgn0015838	2145.22	-0.59756	0.0825235	-7.24109	4.45107e-13	1.52343e-11	2R	Vang
FBgn0035348	55.2318	3.04705	0.420888	7.23956	4.50126e-13	1.53282e-11	3L	CG16758
FBgn0033381	519.373	-1.16545	0.161255	-7.22736	4.92484e-13	1.67151e-11	2R	GstE13
FBgn0038260	86.7962	4.48904	0.622063	7.21637	5.33918e-13	1.80616e-11	3R	CG14855
FBgn0031228	504.346	-1.07049	0.14867	-7.20048	6.00002e-13	2.02303e-11	2L	ND-15
FBgn0039790	660.475	-1.00888	0.140123	-7.19994	6.02397e-13	2.02445e-11	3R	CG2246
FBgn0259722	185.944	-1.14774	0.159841	-7.18054	6.94341e-13	2.32582e-11	X	CG42376
FBgn0031483	663.938	-0.828552	0.115402	-7.17969	6.98701e-13	2.3328e-11	2L	CG9641
FBgn0085423	1207.16	0.98476	0.137279	7.17344	7.31372e-13	2.43395e-11	2L	GramD1B
FBgn0052702	4898.61	-1.22075	0.17029	-7.16867	7.57278e-13	2.51201e-11	X	Cubn
FBgn0020235	2270.74	-0.817127	0.114072	-7.16327	7.87736e-13	2.60461e-11	3R	ATPsyngamma
FBgn0040322	162.646	-1.12764	0.157473	-7.16083	8.01874e-13	2.64283e-11	3L	GNBP2
FBgn0034315	985.79	-0.78424	0.10955	-7.15874	8.14228e-13	2.67495e-11	2R	CG5721
FBgn0033313	1429.03	-1.16189	0.162379	-7.15542	8.34147e-13	2.73163e-11	2R	Cirl
FBgn0030040	2231.59	2.4808	0.346754	7.15435	8.40686e-13	2.74428e-11	X	CG15347
FBgn0035986	386.149	-1.09779	0.153606	-7.14681	8.88155e-13	2.89003e-11	3L	CG4022
FBgn0034643	526.517	-0.797511	0.111619	-7.14493	9.00397e-13	2.92059e-11	2R	CG10321
FBgn0266441	328.866	-1.48835	0.208339	-7.14387	9.07404e-13	2.92828e-11	3L	CG45071
FBgn0035904	3115.72	1.27672	0.17872	7.14371	9.08481e-13	2.92828e-11	3L	GstO3
FBgn0265928	452.432	1.71666	0.240672	7.1328	9.83456e-13	3.16001e-11	3L	lncRNA:CR44717
FBgn0040524	226.29	-1.53094	0.215054	-7.11889	1.08797e-12	3.47406e-11	3R	CG11052
FBgn0039789	51.8952	3.80924	0.535086	7.11894	1.0876e-12	3.47406e-11	3R	CG9717
FBgn0259212	3773.27	0.922968	0.129667	7.11798	1.0952e-12	3.48627e-11	3R	cno
FBgn0262782	1056.06	-0.939752	0.132142	-7.11166	1.14651e-12	3.63832e-11	2L	Mdh1
FBgn0030026	437.411	-1.14956	0.161705	-7.10895	1.16925e-12	3.69902e-11	X	sni
FBgn0004859	162.86	2.52887	0.35599	7.10378	1.21388e-12	3.82838e-11	4	ci
FBgn0263395	868.179	0.794541	0.11189	7.10106	1.23804e-12	3.8926e-11	2R	hppy
FBgn0085257	217.875	-1.35195	0.190879	-7.08279	1.41284e-12	4.42862e-11	2R	CG34228
FBgn0024732	265.252	-1.70303	0.240619	-7.07769	1.46574e-12	4.58043e-11	2R	Drep1
FBgn0000473	326.042	2.1901	0.309611	7.07373	1.50823e-12	4.69889e-11	2R	Cyp6a2
FBgn0032886	739.78	2.20664	0.312363	7.06435	1.61375e-12	5.01241e-11	2L	CG9328
FBgn0266518	1130.35	-0.739325	0.104672	-7.06323	1.62678e-12	5.03761e-11	2R	Dpit47
FBgn0032533	95.4456	-1.62633	0.230279	-7.06244	1.63607e-12	5.05113e-11	2L	CG16888
FBgn0005649	2574.27	-1.02175	0.144765	-7.05802	1.68887e-12	5.18291e-11	3R	Rox8
FBgn0030716	128.361	-2.08121	0.294861	-7.05827	1.68583e-12	5.18291e-11	X	CG9170
FBgn0025739	442.229	-1.26889	0.179839	-7.05569	1.71751e-12	5.25507e-11	X	pon
FBgn0037734	545.705	0.768377	0.109019	7.04813	1.81339e-12	5.53192e-11	3R	trbd
FBgn0030600	396.862	1.53178	0.217386	7.04635	1.83669e-12	5.58637e-11	X	hiw
FBgn0265487	404.155	1.46956	0.208616	7.04436	1.8632e-12	5.65022e-11	2R	mbl
FBgn0053461	42.1842	7.61332	1.08205	7.036	1.9784e-12	5.98188e-11	2R	CG33461
FBgn0053783	997.858	1.49916	0.213099	7.03505	1.99196e-12	6.00516e-11	3R	CG33783
FBgn0036279	80.8372	2.33225	0.331779	7.02954	2.07216e-12	6.22863e-11	3L	Ncc69
FBgn0019662	513.778	1.01239	0.144254	7.01814	2.24836e-12	6.73852e-11	3L	qm
FBgn0029944	550.815	-1.00276	0.143045	-7.01009	2.38164e-12	7.11714e-11	X	Dok
FBgn0010772	843.759	-0.7451	0.106322	-7.00798	2.41789e-12	7.20448e-11	3R	Xe7
FBgn0037882	171.922	-1.27153	0.181471	-7.00679	2.43854e-12	7.24495e-11	3R	CG17187
FBgn0031830	1252.99	-1.03851	0.148259	-7.00468	2.47543e-12	7.33329e-11	2L	COX5B
FBgn0003218	1231.81	1.69895	0.243019	6.99102	2.72899e-12	8.06114e-11	X	rdgB
FBgn0036502	373.587	-1.35777	0.194283	-6.98864	2.77566e-12	8.17545e-11	3L	CG7841
FBgn0031263	4409.79	-1.82395	0.261149	-6.98432	2.86236e-12	8.40664e-11	2L	Tspo
FBgn0041710	2233.11	1.2682	0.181688	6.9801	2.94975e-12	8.62374e-11	3R	yellow-f
FBgn0027088	2615.44	-1.01319	0.145157	-6.97994	2.9531e-12	8.62374e-11	3L	GlyRS
FBgn0033005	1781.17	1.02371	0.146758	6.97547	3.04857e-12	8.87724e-11	2R	CG3107
FBgn0266418	283.531	1.26167	0.180912	6.97393	3.08203e-12	8.94923e-11	3R	wake
FBgn0040011	1575.32	0.808088	0.115891	6.97281	3.10681e-12	8.99571e-11	2L	Slmap
FBgn0035600	2752.37	-0.873307	0.125353	-6.96677	3.24294e-12	9.36341e-11	3L	Cyt-c1
FBgn0266666	522.331	-1.21801	0.174854	-6.96589	3.2633e-12	9.39574e-11	2L	Sem1
FBgn0029657	127.262	2.51139	0.36056	6.96524	3.2784e-12	9.41277e-11	X	CG12535
FBgn0039431	1532.33	1.44418	0.207383	6.96382	3.31168e-12	9.48176e-11	3R	plum
FBgn0028490	6239.38	1.34704	0.193465	6.96274	3.33717e-12	9.52814e-11	2L	CG31705
FBgn0003598	726.15	-0.865284	0.124468	-6.95187	3.60463e-12	1.02632e-10	3R	Su(var)3-7
FBgn0036770	338.113	1.33048	0.191494	6.94789	3.70786e-12	1.05279e-10	3L	Prestin
FBgn0260798	924.063	1.41344	0.203602	6.94219	3.8607e-12	1.09315e-10	2R	Gprk1
FBgn0036931	139.69	-2.01338	0.290109	-6.94007	3.91898e-12	1.1066e-10	3L	CG14183
FBgn0259823	122.891	1.83872	0.265031	6.93778	3.98312e-12	1.12162e-10	3R	CG42404
FBgn0259238	389.676	-1.05497	0.152137	-6.93434	4.08136e-12	1.14614e-10	2R	CG42336
FBgn0034408	271.228	4.55804	0.657568	6.93167	4.15915e-12	1.16479e-10	2R	sano
FBgn0261276	3967.5	-0.871599	0.12586	-6.92514	4.3554e-12	1.21643e-10	2R	Opa1
FBgn0263967	114.043	-1.77267	0.256443	-6.91253	4.76078e-12	1.32603e-10	2R	asRNA:CR43723
FBgn0035298	800.275	-0.906501	0.131443	-6.89653	5.32884e-12	1.48023e-10	3L	SCOT
FBgn0037012	109.607	2.72333	0.395047	6.89368	5.43659e-12	1.50608e-10	3L	Rcd2
FBgn0037751	514.232	-0.996413	0.14465	-6.88845	5.64052e-12	1.55836e-10	3R	topi
FBgn0036843	279.628	-1.51603	0.220155	-6.88619	5.73072e-12	1.57479e-10	3L	Sfxn2
FBgn0036126	705.534	-1.1044	0.160372	-6.88646	5.71972e-12	1.57479e-10	3L	Irbp18
FBgn0264679	32.2512	-3.70381	0.538845	-6.87361	6.25951e-12	1.71551e-10	2R	asRNA:CR43964
FBgn0016119	1370.49	-0.978539	0.142529	-6.86554	6.6239e-12	1.81053e-10	3R	ATPsynCF6
FBgn0031392	532.457	-0.747206	0.108894	-6.86179	6.80042e-12	1.85384e-10	2L	AIF
FBgn0032456	9167.84	0.873841	0.127733	6.84114	7.85628e-12	2.13599e-10	2L	MRP
FBgn0004858	47.9254	2.68614	0.392774	6.8389	7.98037e-12	2.16399e-10	2L	elB
FBgn0034259	1794.18	-1.01577	0.148578	-6.83661	8.10892e-12	2.19305e-10	2R	P32
FBgn0010397	1705.98	1.53008	0.224152	6.82609	8.72618e-12	2.35377e-10	2R	LamC
FBgn0250819	116.794	2.49447	0.365764	6.8199	9.11038e-12	2.45096e-10	4	CG33521
FBgn0040091	533.636	-1.95941	0.287326	-6.81948	9.13676e-12	2.45162e-10	2R	Ugt317A1
FBgn0011725	885.07	-1.06421	0.156086	-6.81809	9.22588e-12	2.46907e-10	3R	twin
FBgn0264975	1182.59	2.48326	0.364291	6.81669	9.31612e-12	2.48213e-10	X	Nrg
FBgn0000212	2495.53	-1.06805	0.156683	-6.81658	9.32313e-12	2.48213e-10	3L	brm
FBgn0037206	655.864	-1.22897	0.180744	-6.7995	1.0498e-11	2.78768e-10	3L	CG12768
FBgn0033392	194.795	1.05873	0.155732	6.79842	1.05772e-11	2.80146e-10	2R	CG8027
FBgn0030364	1374.79	-0.963672	0.141797	-6.79615	1.07451e-11	2.83859e-10	X	Lsm12
FBgn0027660	220.219	1.27631	0.187964	6.7902	1.11979e-11	2.95059e-10	3L	blot
FBgn0000723	490.396	2.09915	0.309453	6.78341	1.17374e-11	3.08483e-10	3R	FER
FBgn0034988	424.936	-1.40198	0.206831	-6.77838	1.21533e-11	3.18598e-10	2R	cN-IIIB
FBgn0021944	1866.47	-1.18287	0.17452	-6.77786	1.21971e-11	3.1893e-10	2L	Coprox
FBgn0038972	424.722	-1.22133	0.180249	-6.77579	1.23726e-11	3.22696e-10	3R	CG7054
FBgn0000490	30.3763	4.10335	0.606263	6.76826	1.30337e-11	3.39074e-10	2L	dpp
FBgn0014877	995.707	-0.810815	0.119844	-6.76557	1.32782e-11	3.44561e-10	2R	Roe1
FBgn0038474	514.913	-0.875539	0.129676	-6.75172	1.46098e-11	3.78158e-10	3R	mRpS11
FBgn0004167	12961	1.87026	0.277126	6.74879	1.49087e-11	3.84923e-10	3L	kst
FBgn0010100	3469.19	-0.884393	0.131059	-6.74806	1.49839e-11	3.85892e-10	2L	mAcon1
FBgn0024509	1475.59	-0.624956	0.0926211	-6.74745	1.50467e-11	3.86538e-10	3R	Sec13
FBgn0036985	54.0581	2.44649	0.362762	6.74408	1.54001e-11	3.94628e-10	3L	zye
FBgn0261797	3844.55	-1.0674	0.158311	-6.7424	1.55791e-11	3.98218e-10	3L	Dhc64C
FBgn0032253	21.911	4.04254	0.59978	6.74004	1.58345e-11	4.03741e-10	2L	LManI
FBgn0027929	56.6953	3.7627	0.558891	6.73243	1.66849e-11	4.24368e-10	2L	NimB1
FBgn0086757	1247.25	-0.754836	0.112247	-6.72479	1.75844e-11	4.46138e-10	2R	cbs
FBgn0038679	111.465	2.42217	0.360279	6.72304	1.77975e-11	4.5043e-10	3R	CG6040
FBgn0038484	127.688	7.44167	1.10826	6.71471	1.88446e-11	4.75757e-10	3R	CG5246
FBgn0014028	1865.02	-0.787346	0.117568	-6.69692	2.12855e-11	5.3606e-10	2R	SdhB
FBgn0261565	768.165	1.48886	0.222365	6.69559	2.14802e-11	5.39638e-10	3L	Lmpt
FBgn0259697	67.5818	1.58281	0.236536	6.69163	2.207e-11	5.53099e-10	3L	nvd
FBgn0011227	524.073	-1.38816	0.207884	-6.67755	2.42971e-11	6.07427e-10	2R	ox
FBgn0042111	436.186	-0.867759	0.130001	-6.67502	2.47197e-11	6.16489e-10	3R	CG18766
FBgn0051352	322.356	-1.26773	0.190108	-6.66845	2.58516e-11	6.43153e-10	3R	Unc-115a
FBgn0034356	120.055	-2.58735	0.388296	-6.66334	2.67667e-11	6.64307e-10	2R	Pepck2
FBgn0266629	519.045	1.59253	0.239087	6.66089	2.72176e-11	6.73865e-10	2R	asRNA:CR45136
FBgn0032629	43.6767	2.83532	0.426282	6.65128	2.90554e-11	7.17635e-10	2L	beat-IIIc
FBgn0021967	452.9	-0.866152	0.130271	-6.64883	2.95431e-11	7.27924e-10	2L	ND-PDSW
FBgn0032178	73.568	-2.27311	0.342607	-6.63476	3.25038e-11	7.98955e-10	2L	Spn31A
FBgn0016650	53.6078	-2.75246	0.415119	-6.63054	3.34471e-11	8.20173e-10	3R	Lgr1
FBgn0058178	782.8	1.55612	0.235259	6.61451	3.72787e-11	9.11949e-10	3L	CG40178
FBgn0010768	83.7031	-1.92896	0.291642	-6.61414	3.73729e-11	9.12078e-10	3R	sqz
FBgn0039849	644.435	-0.641865	0.0970693	-6.61244	3.7804e-11	9.18817e-10	3R	CG11334
FBgn0261547	1637.96	1.55509	0.23518	6.61234	3.78284e-11	9.18817e-10	3L	Exn
FBgn0259111	810.245	2.10328	0.318609	6.60144	4.07197e-11	9.86706e-10	2L	Ndae1
FBgn0000615	239.937	-1.25705	0.19045	-6.60043	4.09976e-11	9.91098e-10	2R	exu
FBgn0033913	2573.76	1.78531	0.270706	6.59501	4.25217e-11	1.02552e-09	2R	CG8468
FBgn0063494	2256.66	-1.59734	0.242222	-6.59455	4.26556e-11	1.02634e-09	2R	GstE6
FBgn0033377	1638.12	-0.898692	0.136467	-6.5854	4.53654e-11	1.08898e-09	2R	Pgm2a
FBgn0033115	28.1242	-3.45336	0.524747	-6.58101	4.67277e-11	1.11906e-09	2R	Spn42De
FBgn0261274	1101.93	-1.05755	0.160826	-6.57571	4.84213e-11	1.15692e-09	3L	Ero1L
FBgn0023531	734.148	-0.734463	0.111875	-6.56501	5.20304e-11	1.24026e-09	X	CG32809
FBgn0261555	340.348	2.69289	0.410672	6.55729	5.47938e-11	1.3031e-09	3L	CG42673
FBgn0030305	451.454	-0.934449	0.142699	-6.5484	5.81573e-11	1.37989e-09	X	Uba5
FBgn0038262	121.412	4.76157	0.729118	6.53059	6.55103e-11	1.55076e-09	3R	CG14857
FBgn0038045	491.964	-1.75677	0.269189	-6.52616	6.74787e-11	1.59368e-09	3R	NANS
FBgn0029095	2746.21	1.2656	0.193952	6.52532	6.78548e-11	1.59888e-09	2L	aru
FBgn0029167	27759.5	1.75473	0.269259	6.5169	7.17761e-11	1.6874e-09	3L	Hml
FBgn0263200	213.662	1.34984	0.207147	6.51635	7.20375e-11	1.68967e-09	2L	Galt
FBgn0041087	83.481	2.63644	0.404638	6.51555	7.24243e-11	1.69486e-09	2R	wun2
FBgn0260991	1738.16	-1.33423	0.204795	-6.51494	7.27209e-11	1.69793e-09	2R	Incenp
FBgn0031663	557.525	-1.23083	0.18896	-6.51369	7.33247e-11	1.70813e-09	2L	CG8891
FBgn0004435	1673.01	1.11598	0.171374	6.51196	7.41758e-11	1.72014e-09	2R	Galphaq
FBgn0035574	23.0409	4.27804	0.656924	6.51223	7.40442e-11	1.72014e-09	3L	RhoGEF64C
FBgn0031216	1023.54	-1.03608	0.159115	-6.51152	7.43925e-11	1.72127e-09	2L	Zir
FBgn0031245	171.43	-1.6287	0.250286	-6.50735	7.64892e-11	1.7658e-09	2L	CG3625
FBgn0041604	1014.89	1.55273	0.238661	6.50599	7.71838e-11	1.77783e-09	3L	dlp
FBgn0036194	741.732	-1.33446	0.205444	-6.4955	8.27574e-11	1.90194e-09	3L	Dph1
FBgn0002733	316.248	1.51827	0.2342	6.48278	9.00469e-11	2.06483e-09	3R	E(spl)mbeta-HLH
FBgn0001202	1490.64	0.594066	0.0917259	6.47653	9.38538e-11	2.14732e-09	2L	hook
FBgn0036805	843.403	-0.885175	0.136687	-6.47592	9.42345e-11	2.15123e-09	3L	Chmp1
FBgn0036271	1078.01	-1.20328	0.185968	-6.47038	9.77589e-11	2.22673e-09	3L	Pbgs
FBgn0033686	426.824	1.48387	0.22956	6.46398	1.01984e-10	2.31783e-09	2R	Hen1
FBgn0262115	1397.67	0.733064	0.113516	6.45783	1.06217e-10	2.40868e-09	2R	CG17683
FBgn0032422	51.5207	4.60291	0.713293	6.45304	1.09626e-10	2.48051e-09	2L	atilla
FBgn0028546	406.344	-0.919301	0.142568	-6.44815	1.13226e-10	2.55631e-09	2L	ics
FBgn0004132	317.557	-1.26009	0.195434	-6.44761	1.13625e-10	2.55969e-09	2R	boca
FBgn0085400	26.6558	3.28552	0.510886	6.43101	1.26757e-10	2.84925e-09	2R	side-V
FBgn0034258	8373.3	-0.88832	0.138151	-6.43009	1.27528e-10	2.86031e-09	2R	eIF3c
FBgn0010043	236.829	1.70417	0.265067	6.42921	1.28268e-10	2.87062e-09	3R	GstD7
FBgn0264437	2390.11	3.6023	0.560458	6.42744	1.29775e-10	2.89802e-09	2L	lncRNA:CR43855
FBgn0033918	2037.41	-0.776399	0.120909	-6.42136	1.35065e-10	3.00961e-09	2R	CG8531
FBgn0027657	401.4	2.21939	0.345833	6.41752	1.38517e-10	3.07315e-09	3R	glob1
FBgn0011570	2790.53	-0.72971	0.1137	-6.41783	1.38229e-10	3.07315e-09	2L	cpb
FBgn0035868	639.501	-1.07518	0.167602	-6.41506	1.4077e-10	3.11641e-09	3L	CG7194
FBgn0037579	144.194	-1.7376	0.271051	-6.41059	1.44956e-10	3.20128e-09	3R	COX7AL
FBgn0034498	461.574	-0.890774	0.13896	-6.4103	1.45229e-10	3.20128e-09	2R	CG16868
FBgn0039026	2476.29	1.03237	0.161101	6.40823	1.47218e-10	3.23817e-09	3R	CG7029
FBgn0035113	587.954	-1.02895	0.160599	-6.40698	1.48433e-10	3.25789e-09	3L	pyx
FBgn0063492	504.221	-1.06611	0.166413	-6.40642	1.4898e-10	3.26291e-09	2R	GstE8
FBgn0034877	1610.54	-0.834285	0.130904	-6.37327	1.85044e-10	4.04415e-09	2R	levy
FBgn0028662	2954.09	-0.787034	0.123505	-6.3725	1.85971e-10	4.05576e-09	3R	VhaPPA1-1
FBgn0035039	201.507	-1.36018	0.213477	-6.37157	1.87098e-10	4.07166e-09	2R	Adck
FBgn0262515	2343.27	-0.659423	0.103509	-6.37069	1.88174e-10	4.0864e-09	2R	VhaAC45
FBgn0020414	3602.47	1.54666	0.242872	6.36818	1.91278e-10	4.14298e-09	2L	Idgf3
FBgn0032955	36.1232	2.75087	0.432009	6.36763	1.91974e-10	4.14298e-09	2L	CG2201
FBgn0035667	49.2713	4.27361	0.671148	6.36761	1.91992e-10	4.14298e-09	3L	Jon65Ai
FBgn0031760	359.728	-0.999354	0.156961	-6.36691	1.92873e-10	4.15326e-09	2L	Tsp26A
FBgn0011659	1277.5	-1.49261	0.235001	-6.35151	2.13218e-10	4.57888e-09	2R	Mlh1
FBgn0085390	48.3185	3.46395	0.545393	6.35128	2.13532e-10	4.57888e-09	2R	Dgk
FBgn0015221	11377.8	-1.58626	0.250109	-6.34227	2.26399e-10	4.84465e-09	3R	Fer2LCH
FBgn0037917	300.826	-1.16416	0.183631	-6.33964	2.30301e-10	4.91789e-09	3R	wkd
FBgn0062565	106.278	1.33816	0.211285	6.33345	2.39745e-10	5.10891e-09	X	Or19b
FBgn0027615	286.653	-0.813725	0.128592	-6.32796	2.48422e-10	5.28284e-09	3L	OXA1L
FBgn0038292	83.5884	2.18423	0.345541	6.32119	2.59556e-10	5.50818e-09	3R	CG3987
FBgn0053181	44.8403	2.37936	0.376969	6.31182	2.7578e-10	5.84038e-09	X	CG33181
FBgn0003016	257.511	1.53226	0.242982	6.30606	2.86219e-10	6.04896e-09	2L	osp
FBgn0283461	191.412	3.914	0.620726	6.30552	2.87231e-10	6.05786e-09	3L	Drs
FBgn0011769	304.34	-1.04994	0.166656	-6.30006	2.97532e-10	6.26223e-09	3L	Fdx1
FBgn0035253	3914.92	-0.546424	0.0867409	-6.29949	2.98628e-10	6.27242e-09	3L	CG7971
FBgn0053542	1126.91	2.38207	0.378284	6.29704	3.03379e-10	6.35916e-09	X	upd3
FBgn0034885	34.7731	7.4926	1.19075	6.29232	3.12765e-10	6.54254e-09	2R	Eglp4
FBgn0011708	804.602	-0.795543	0.126467	-6.29052	3.16398e-10	6.60505e-09	2L	Syx5
FBgn0031977	1736.37	-0.862051	0.137137	-6.28604	3.25665e-10	6.78469e-09	2L	baf
FBgn0038530	43.7004	2.77485	0.441485	6.28525	3.27322e-10	6.80537e-09	3R	AttD
FBgn0032172	2466.01	0.82282	0.130993	6.28139	3.35568e-10	6.96269e-09	2L	CG5850
FBgn0035076	82.6146	5.56851	0.886669	6.28026	3.38002e-10	6.99902e-09	2R	Ance-5
FBgn0038243	69.5302	2.76422	0.440392	6.27673	3.45765e-10	7.14535e-09	3R	CG8066
FBgn0034403	56.8044	-2.74978	0.438225	-6.2748	3.50095e-10	7.22027e-09	2R	CG18190
FBgn0032773	76.7246	5.46173	0.87077	6.2723	3.55763e-10	7.32243e-09	2L	fon
FBgn0012344	39.3049	3.01304	0.480638	6.26885	3.63732e-10	7.46935e-09	3R	Dh44
FBgn0035203	2185.04	-0.6326	0.100916	-6.26858	3.64358e-10	7.46935e-09	3L	CG9149
FBgn0037486	48.5203	5.97883	0.954262	6.26539	3.71886e-10	7.60845e-09	3R	CG14605
FBgn0032815	1843.59	-0.7301	0.116703	-6.25604	3.94868e-10	8.04652e-09	2L	CG10462
FBgn0264493	542.833	0.846048	0.135232	6.25628	3.9426e-10	8.04652e-09	3R	rdx
FBgn0011754	731.278	-0.863863	0.13819	-6.25127	4.07141e-10	8.28016e-09	X	PhKgamma
FBgn0025630	400.448	-1.25147	0.200273	-6.24885	4.1349e-10	8.39262e-09	X	Rtca
FBgn0027793	117.903	-2.50042	0.400426	-6.2444	4.25435e-10	8.61112e-09	X	CG14787
FBgn0027903	568.515	-1.14809	0.183865	-6.24421	4.25936e-10	8.61112e-09	3L	CG12018
FBgn0030872	307.343	-0.874999	0.140184	-6.24181	4.3254e-10	8.72743e-09	X	Ucp4A
FBgn0264617	91.6926	2.02591	0.324681	6.2397	4.38402e-10	8.82834e-09	4	asRNA:CR43957
FBgn0037822	1242.63	-0.984133	0.158038	-6.22721	4.74817e-10	9.54289e-09	3R	CG14683
FBgn0035082	375.624	-0.808213	0.129795	-6.22684	4.7593e-10	9.54655e-09	2R	CG2811
FBgn0037844	963.127	-1.8327	0.294692	-6.21904	5.00193e-10	1.00136e-08	3R	CG4570
FBgn0250789	15568.3	-0.819286	0.131793	-6.21644	5.08554e-10	1.01612e-08	3L	alpha-Spec
FBgn0031213	914.849	-1.06486	0.171377	-6.21357	5.17944e-10	1.03287e-08	2L	galectin
FBgn0086251	1112.58	-1.36035	0.219016	-6.21118	5.25866e-10	1.04663e-08	2L	del
FBgn0053282	52.7069	4.84933	0.780896	6.20996	5.2997e-10	1.05275e-08	2L	CG33282
FBgn0264699	163.792	1.54931	0.249797	6.20227	5.56554e-10	1.10342e-08	3L	CG43968
FBgn0042177	800.501	-0.713588	0.115164	-6.19628	5.78139e-10	1.144e-08	3L	Arts
FBgn0035850	657.828	-0.796339	0.128871	-6.17935	6.4368e-10	1.27124e-08	3L	Atg18a
FBgn0011604	4127.37	-0.828561	0.134149	-6.17643	6.55659e-10	1.2924e-08	2R	Iswi
FBgn0025525	465.062	2.37615	0.385054	6.17094	6.78846e-10	1.33554e-08	3L	bab2
FBgn0025455	2277.73	-0.758298	0.12301	-6.16453	7.06912e-10	1.38809e-08	3L	CycT
FBgn0030607	225.79	-1.20188	0.195032	-6.1625	7.16043e-10	1.40334e-08	X	dob
FBgn0003886	232.122	2.2805	0.370235	6.15961	7.29251e-10	1.42649e-08	3R	alphaTub85E
FBgn0033998	1777.73	-0.579181	0.0940775	-6.15642	7.44064e-10	1.4527e-08	2R	row
FBgn0033354	1226.57	-0.759734	0.123437	-6.15483	7.51564e-10	1.46455e-08	2R	FANCI
FBgn0033453	1803.72	1.5235	0.24761	6.15283	7.61139e-10	1.48039e-08	2R	Sting
FBgn0031945	38.7872	2.66253	0.432864	6.15097	7.70111e-10	1.49501e-08	2L	CG7191
FBgn0085465	27.8076	4.03902	0.657004	6.14763	7.86504e-10	1.52394e-08	3R	CG34436
FBgn0025640	704.597	-0.76273	0.124121	-6.14506	7.9935e-10	1.54591e-08	X	CG13369
FBgn0052816	16.2988	5.14507	0.837625	6.14245	8.12603e-10	1.56858e-08	X	CG32816
FBgn0027080	1201.33	-0.645445	0.105108	-6.14075	8.21311e-10	1.58241e-08	3L	TyrRS
FBgn0030087	2783.04	-0.69536	0.113351	-6.13459	8.53785e-10	1.64189e-08	X	CG7766
FBgn0039282	107.76	-1.35836	0.221483	-6.133	8.62398e-10	1.65226e-08	3R	Bili
FBgn0033921	459.971	-1.18677	0.193505	-6.133	8.62374e-10	1.65226e-08	2R	tej
FBgn0041180	8996.4	1.72036	0.280581	6.13142	8.70972e-10	1.6563e-08	2L	Tep4
FBgn0086758	2574.39	1.36856	0.223179	6.13213	8.6711e-10	1.6563e-08	2L	chinmo
FBgn0250868	214.42	-1.33828	0.218256	-6.1317	8.69437e-10	1.6563e-08	2R	CG42239
FBgn0034951	170.206	-0.978539	0.159589	-6.1316	8.6997e-10	1.6563e-08	2R	CG3860
FBgn0085466	1090.51	2.16058	0.352407	6.13092	8.73747e-10	1.6585e-08	3R	CG34437
FBgn0052681	19.0042	4.04195	0.660738	6.11733	9.51564e-10	1.80287e-08	X	CG32681
FBgn0032120	287.112	1.00466	0.164278	6.1156	9.61923e-10	1.81914e-08	2L	CG33298
FBgn0034709	36.1462	3.6505	0.599705	6.08716	1.14932e-09	2.16846e-08	2R	Swim
FBgn0036749	143.463	2.12963	0.349869	6.08694	1.15087e-09	2.16846e-08	3L	CG7460
FBgn0030431	207.304	-0.874763	0.143873	-6.08011	1.20099e-09	2.25874e-08	X	CG4407
FBgn0037760	1136.06	-0.823362	0.135499	-6.07653	1.22811e-09	2.29958e-08	3R	FBXO11
FBgn0000158	443.743	-1.60227	0.263667	-6.07687	1.22552e-09	2.29958e-08	3R	bam
FBgn0039644	3176.46	1.26812	0.208698	6.07636	1.22943e-09	2.29958e-08	3R	rdog
FBgn0037770	475.114	-0.69393	0.11424	-6.07432	1.24515e-09	2.32474e-08	3R	Art4
FBgn0267861	1292.52	0.879466	0.144807	6.07337	1.25254e-09	2.33429e-08	2R	Maf1
FBgn0036958	1003.21	-0.815472	0.134308	-6.07166	1.26596e-09	2.35502e-08	3L	CG17233
FBgn0032519	269.273	-1.63313	0.269193	-6.06677	1.30505e-09	2.42161e-08	2L	CG16957
FBgn0003401	366.957	-0.995335	0.164068	-6.0666	1.30649e-09	2.42161e-08	2R	shu
FBgn0015737	3212.29	-0.750593	0.123759	-6.06496	1.31982e-09	2.44191e-08	3R	Hmu
FBgn0027949	853.827	-1.38176	0.227906	-6.06284	1.33735e-09	2.46945e-08	2L	msb1l
FBgn0035608	3282.08	1.4796	0.244054	6.06258	1.33952e-09	2.46945e-08	3L	blanks
FBgn0263391	2575.18	-1.01873	0.168238	-6.05529	1.40164e-09	2.57932e-08	2R	hts
FBgn0040752	737.433	1.40528	0.232139	6.05361	1.41632e-09	2.60166e-08	2R	Prosap
FBgn0035907	173.178	-1.08101	0.178784	-6.04644	1.48085e-09	2.71534e-08	3L	GstO1
FBgn0051118	162.185	-1.10981	0.183561	-6.04603	1.48457e-09	2.71729e-08	3R	RabX4
FBgn0037231	669.27	-0.721219	0.11934	-6.04341	1.50892e-09	2.75695e-08	3R	Vps24
FBgn0032744	611.937	-0.939493	0.15552	-6.04098	1.53177e-09	2.79371e-08	2L	Ttc19
FBgn0038251	497.895	-0.896535	0.148659	-6.03083	1.63116e-09	2.96969e-08	3R	Hexim
FBgn0034614	689.025	-1.44605	0.239825	-6.02962	1.64346e-09	2.98679e-08	2R	CG9752
FBgn0051272	356.555	2.63176	0.437262	6.01872	1.75805e-09	3.18938e-08	3R	CG31272
FBgn0262117	1481.15	0.811301	0.134819	6.0177	1.76916e-09	3.20386e-08	2R	IntS3
FBgn0086711	37.7676	2.41812	0.401912	6.01654	1.78186e-09	3.2155e-08	2L	mol
FBgn0262114	1838.84	-0.778948	0.129463	-6.01675	1.77959e-09	3.2155e-08	2R	RanBPM
FBgn0040056	858.06	1.09483	0.182137	6.01102	1.84364e-09	3.32114e-08	3L	CG17698
FBgn0259227	866.115	1.58491	0.263974	6.00405	1.92455e-09	3.46081e-08	3R	CG42327
FBgn0028670	2250.96	-1.0178	0.169588	-6.00161	1.95376e-09	3.50718e-08	3R	Vha100-2
FBgn0000559	142862	0.582439	0.0970519	6.00132	1.95724e-09	3.5073e-08	2L	eEF2
FBgn0266253	26.496	4.91566	0.819886	5.99555	2.02803e-09	3.6278e-08	3R	lncRNA:CR44948
FBgn0038198	29.3668	4.24514	0.70819	5.99435	2.043e-09	3.64822e-08	3R	Npc2b
FBgn0086679	902.842	0.845567	0.141164	5.98996	2.09892e-09	3.74155e-08	3R	p
FBgn0000273	1135.84	0.849272	0.141969	5.98208	2.2031e-09	3.92044e-08	2L	Pka-C1
FBgn0013733	22922.8	0.93638	0.156766	5.97311	2.32768e-09	4.13496e-08	2R	shot
FBgn0034419	585.195	-0.773494	0.129636	-5.96668	2.42124e-09	4.28631e-08	2R	CG15111
FBgn0000017	2277.19	0.866998	0.145304	5.9668	2.41955e-09	4.28631e-08	3L	Abl
FBgn0040206	844.121	-0.961964	0.161261	-5.96527	2.44235e-09	4.31623e-08	3R	krz
FBgn0265991	316.231	3.6724	0.61581	5.96353	2.46849e-09	4.34743e-08	2R	Zasp52
FBgn0035789	14.5743	7.73642	1.29724	5.96376	2.46502e-09	4.34743e-08	3L	mthl6
FBgn0045063	4805.83	1.11874	0.18765	5.9618	2.49467e-09	4.38599e-08	2R	fdl
FBgn0026741	287.625	-1.02797	0.172438	-5.96138	2.50118e-09	4.38992e-08	2R	mRpL18
FBgn0032770	38.6157	4.22272	0.708642	5.95889	2.53962e-09	4.44216e-08	2L	CG13086
FBgn0030240	478.516	0.757779	0.127163	5.95911	2.53612e-09	4.44216e-08	X	CG2202
FBgn0039114	245.51	-0.815039	0.136812	-5.95735	2.56363e-09	4.47653e-08	3R	Lsd-1
FBgn0029123	103.301	1.74847	0.293844	5.95032	2.67614e-09	4.66504e-08	2L	SoxN
FBgn0032908	41.5269	2.47278	0.415868	5.94608	2.74643e-09	4.77944e-08	2L	CG9270
FBgn0035335	336.242	-1.03105	0.173419	-5.9454	2.75787e-09	4.79121e-08	3L	mRpL23
FBgn0024360	531.802	-0.877482	0.147723	-5.94004	2.84951e-09	4.94204e-08	X	MTPAP
FBgn0035903	377.447	-0.963608	0.162243	-5.93929	2.86265e-09	4.95644e-08	3L	CG6765
FBgn0000250	3413.04	1.29863	0.218934	5.93161	2.99985e-09	5.18524e-08	2L	cact
FBgn0032670	35.9515	-2.87308	0.484683	-5.92775	3.07111e-09	5.29947e-08	2L	CG5783
FBgn0052654	1068.07	-0.708986	0.119803	-5.91794	3.25993e-09	5.61584e-08	X	Sec16
FBgn0025743	840.351	-0.757754	0.128071	-5.91668	3.28512e-09	5.64975e-08	X	mbt
FBgn0050389	1592.5	0.707595	0.119627	5.91501	3.31855e-09	5.69768e-08	2R	CG30389
FBgn0003137	2047.3	2.03305	0.343806	5.91336	3.35202e-09	5.74551e-08	3R	Ppn
FBgn0086779	1475.71	0.995778	0.168434	5.91197	3.38044e-09	5.78455e-08	2L	step
FBgn0085478	1718.92	0.882998	0.149617	5.90174	3.59691e-09	6.14473e-08	X	CG34449
FBgn0023174	2100.54	-0.516155	0.0874731	-5.90073	3.61891e-09	6.17202e-08	3L	Prosbeta2
FBgn0003310	1386.73	1.32181	0.22403	5.90016	3.63147e-09	6.18315e-08	2L	S
FBgn0030990	1269.33	-0.766246	0.130061	-5.89143	3.82872e-09	6.50818e-08	X	CG7556
FBgn0038224	1730.67	-0.850879	0.144465	-5.88987	3.86506e-09	6.55908e-08	3R	ATPsynE
FBgn0264481	21.2159	3.15289	0.535837	5.88405	4.00347e-09	6.78274e-08	3L	asRNA:CR43889
FBgn0030486	992.911	-0.967251	0.164455	-5.88154	4.06474e-09	6.87518e-08	X	Set2
FBgn0011640	1599.36	-0.670242	0.113993	-5.87968	4.11059e-09	6.94127e-08	3L	lark
FBgn0000579	7173.67	-1.09277	0.185903	-5.87818	4.14797e-09	6.99288e-08	2L	Eno
FBgn0262794	144.524	4.11588	0.701045	5.87107	4.32987e-09	7.28755e-08	3R	CG43175
FBgn0038925	976.691	-0.763561	0.130099	-5.86906	4.3828e-09	7.36454e-08	3R	Cchl
FBgn0027057	570.531	0.700094	0.11932	5.86737	4.42763e-09	7.4277e-08	3L	CSN1b
FBgn0051390	506.015	0.971178	0.16553	5.86707	4.43556e-09	7.42884e-08	3R	MED7
FBgn0032297	17.5436	3.08573	0.526395	5.862	4.57314e-09	7.64676e-08	2L	CG17124
FBgn0010215	3089.09	0.888013	0.151563	5.85905	4.65514e-09	7.7712e-08	3L	alpha-Cat
FBgn0033696	90.9102	-1.38796	0.236903	-5.85875	4.66361e-09	7.77268e-08	2R	Cyp6g2
FBgn0054031	265.349	-1.08136	0.184794	-5.85171	4.8654e-09	8.09583e-08	3L	CG34031
FBgn0261387	2651.28	1.02153	0.174593	5.85091	4.88888e-09	8.12171e-08	2R	CG17528
FBgn0027359	602.658	-1.02916	0.175928	-5.84988	4.91938e-09	8.15917e-08	X	Tim8
FBgn0085386	50.38	3.13355	0.536067	5.84544	5.05233e-09	8.36614e-08	3R	CG34357
FBgn0039830	11146.3	-0.806082	0.137916	-5.84471	5.0745e-09	8.38929e-08	3R	ATPsynC
FBgn0262952	6517.4	1.1702	0.200265	5.84324	5.11953e-09	8.45011e-08	mitochondrion_genome	ND4
FBgn0032717	1853.52	-0.810167	0.138755	-5.83882	5.2572e-09	8.64949e-08	2L	CG10600
FBgn0031117	283.731	-1.29332	0.221497	-5.83901	5.25114e-09	8.64949e-08	X	GstT3
FBgn0014033	113.454	2.95335	0.506334	5.8328	5.4504e-09	8.95299e-08	2L	Sr-CI
FBgn0004581	1104.33	-1.20948	0.207506	-5.82866	5.58747e-09	9.16345e-08	2R	bgcn
FBgn0037607	3556.83	-1.17013	0.200843	-5.82609	5.67402e-09	9.29052e-08	3R	CG8036
FBgn0040227	4806.74	-0.699971	0.120179	-5.82439	5.73228e-09	9.37095e-08	3R	eIF3d1
FBgn0031782	398.238	-0.823107	0.141359	-5.82282	5.7863e-09	9.44421e-08	2L	WDR79
FBgn0032981	923.286	1.44143	0.247952	5.81334	6.124e-09	9.9795e-08	2L	CG3635
FBgn0040005	1267.23	0.701816	0.120742	5.81252	6.1538e-09	1.00121e-07	2R	CG17883
FBgn0032474	597.224	0.928597	0.159986	5.80426	6.46524e-09	1.05022e-07	2L	DnaJ-H
FBgn0037234	863.413	-0.587979	0.101333	-5.80247	6.53455e-09	1.0598e-07	3R	CG9795
FBgn0243514	390.447	1.82555	0.314836	5.79841	6.69478e-09	1.08407e-07	3R	eater
FBgn0259896	260.652	2.58637	0.446216	5.79624	6.78166e-09	1.0964e-07	2L	NimC1
FBgn0029113	1566.01	-0.526774	0.0909818	-5.78988	7.04353e-09	1.13695e-07	3L	Uba2
FBgn0033174	310.596	-0.934073	0.161352	-5.78905	7.07845e-09	1.14079e-07	2R	CG11125
FBgn0025352	814.441	-0.747585	0.129173	-5.78748	7.14504e-09	1.14971e-07	2R	Thiolase
FBgn0040370	311.628	1.5184	0.26243	5.78594	7.21072e-09	1.15846e-07	X	CG13375
FBgn0028694	1837.06	-0.532142	0.0919923	-5.78464	7.26663e-09	1.16425e-07	2L	Rpn11
FBgn0035496	78.6297	2.75531	0.476319	5.78458	7.26945e-09	1.16425e-07	3L	CG14990
FBgn0010747	1404.97	-0.436695	0.075505	-5.78365	7.30961e-09	1.16885e-07	3L	Srp54k
FBgn0039525	70.0259	-1.76746	0.305714	-5.78141	7.40777e-09	1.1827e-07	3R	CG5646
FBgn0034365	103.93	-1.51992	0.262965	-5.77995	7.47219e-09	1.19113e-07	2R	CG5335
FBgn0036334	2206.85	-0.89489	0.154929	-5.77614	7.64324e-09	1.21651e-07	3L	CG11267
FBgn0031214	41.4066	-2.12662	0.368228	-5.77527	7.68297e-09	1.22094e-07	2L	CG11374
FBgn0040528	239.729	-1.30968	0.226825	-5.77397	7.74234e-09	1.22847e-07	3R	CG15864
FBgn0086361	4759.29	0.619419	0.107291	5.77325	7.77565e-09	1.23185e-07	3R	alph
FBgn0087007	382.767	2.38192	0.412679	5.77184	7.84095e-09	1.24027e-07	3L	bbg
FBgn0031689	194.423	-2.44473	0.423678	-5.77025	7.9156e-09	1.25015e-07	2L	Cyp28d1
FBgn0000535	17.5159	3.35436	0.581687	5.7666	8.08855e-09	1.2755e-07	X	eag
FBgn0266410	8966.41	0.890433	0.154483	5.76394	8.21747e-09	1.29384e-07	3R	CG45050
FBgn0002643	1264.04	0.912662	0.158489	5.75853	8.48496e-09	1.33391e-07	2R	mam
FBgn0024230	352.695	0.89617	0.155651	5.75757	8.53339e-09	1.33947e-07	2L	Hs2st
FBgn0034800	204.561	-1.5325	0.266225	-5.75643	8.59123e-09	1.34648e-07	2R	CG3788
FBgn0267073	423.144	1.85329	0.322341	5.74948	8.9518e-09	1.40085e-07	X	lncRNA:CR45517
FBgn0261108	747.653	-1.06795	0.185793	-5.7481	9.02529e-09	1.4102e-07	3R	Atg13
FBgn0033809	895.043	-0.846275	0.14726	-5.74681	9.09446e-09	1.41885e-07	2R	CG4630
FBgn0030114	501.535	-0.966655	0.168224	-5.74625	9.12417e-09	1.42132e-07	X	CG17754
FBgn0035720	1900.99	-0.519845	0.0904737	-5.74581	9.14841e-09	1.42293e-07	3L	CG10077
FBgn0004512	147.032	1.86492	0.324626	5.74482	9.20198e-09	1.42909e-07	2R	Mdr49
FBgn0037680	211.135	-1.29288	0.225084	-5.74397	9.24843e-09	1.43414e-07	3R	pasi2
FBgn0017545	31506.9	0.620182	0.108025	5.74108	9.40769e-09	1.45443e-07	4	RpS3A
FBgn0015805	2147.66	-0.790226	0.137642	-5.74118	9.40198e-09	1.45443e-07	3L	HDAC1
FBgn0033010	993.673	0.913956	0.159245	5.7393	9.50669e-09	1.46752e-07	2R	Atf6
FBgn0016919	135.884	1.85652	0.323683	5.73559	9.71712e-09	1.49775e-07	2L	nompB
FBgn0025885	21590.2	-1.23385	0.21523	-5.73268	9.8854e-09	1.5214e-07	2R	Inos
FBgn0035262	172.033	1.3149	0.229521	5.72889	1.01091e-08	1.5535e-07	3L	CG18171
FBgn0015399	3577.97	0.933514	0.162965	5.72833	1.01426e-08	1.55631e-07	2L	kek1
FBgn0023095	592.959	2.144	0.374377	5.72686	1.02308e-08	1.56751e-07	3L	caps
FBgn0033465	429.707	-0.883564	0.154369	-5.72372	1.04218e-08	1.59437e-07	2R	NA
FBgn0004865	532.455	1.12046	0.195842	5.72123	1.05759e-08	1.61554e-07	3L	Eip78C
FBgn0029822	589.932	-0.85539	0.149578	-5.71868	1.07356e-08	1.6375e-07	X	CG12236
FBgn0030863	1693.49	-0.706726	0.123756	-5.71063	1.12558e-08	1.71429e-07	X	CG8188
FBgn0037076	542.898	0.898105	0.157417	5.70526	1.16167e-08	1.76663e-07	3L	ebd2
FBgn0050372	1011.15	-0.472631	0.0828787	-5.70268	1.1794e-08	1.79094e-07	2R	Asap
FBgn0039156	1424.79	-1.21268	0.212834	-5.69776	1.21388e-08	1.84058e-07	3R	CG6178
FBgn0017550	1004.81	-0.521652	0.091598	-5.69501	1.23362e-08	1.86769e-07	3R	Rga
FBgn0261673	143.035	2.92169	0.513049	5.69477	1.23541e-08	1.86769e-07	2R	nemy
FBgn0031321	1332.32	-0.478671	0.0840912	-5.69228	1.25356e-08	1.89234e-07	2L	Tgt
FBgn0032752	988.634	-1.37097	0.241023	-5.68813	1.28438e-08	1.93602e-07	2L	CG10702
FBgn0038321	136.998	1.12244	0.197552	5.68174	1.33331e-08	2.0043e-07	3R	CG6218
FBgn0083167	1013.43	-0.837982	0.147488	-5.6817	1.33359e-08	2.0043e-07	X	Neb-cGP
FBgn0037262	924.803	-0.621233	0.109407	-5.67816	1.36149e-08	2.04323e-07	3R	MED31
FBgn0085298	479.826	1.22971	0.216709	5.67446	1.3913e-08	2.08492e-07	3L	CG34269
FBgn0004910	16.2068	4.89811	0.864101	5.66845	1.44098e-08	2.15621e-07	3L	Eip63F-1
FBgn0263930	1910.48	2.00256	0.353327	5.66772	1.44713e-08	2.16225e-07	3L	dally
FBgn0083975	33.7048	3.34419	0.590781	5.66062	1.50825e-08	2.25031e-07	3R	Nlg4
FBgn0034013	726.131	1.59079	0.281508	5.65096	1.59555e-08	2.37708e-07	2R	unc-5
FBgn0030484	327.879	-1.63958	0.290388	-5.64615	1.64081e-08	2.44097e-07	X	GstT4
FBgn0001206	448.095	-0.830432	0.147103	-5.64523	1.64964e-08	2.45055e-07	X	Hmr
FBgn0003638	1663.98	-0.790227	0.140491	-5.62474	1.85786e-08	2.75277e-07	X	su(w[a])
FBgn0260400	185.786	-1.69873	0.302013	-5.62469	1.85845e-08	2.75277e-07	X	elav
FBgn0014029	2094.23	-0.845562	0.150349	-5.62398	1.86603e-08	2.75602e-07	3R	2002-09-01
FBgn0033127	271.463	-1.0918	0.194132	-5.62402	1.86563e-08	2.75602e-07	2R	Tsp42Ef
FBgn0265935	2108.47	-0.621741	0.110569	-5.62311	1.87554e-08	2.76608e-07	2R	coro
FBgn0263132	791.968	-1.22052	0.217129	-5.62117	1.89666e-08	2.79321e-07	X	Cht6
FBgn0032086	31.8594	4.10788	0.731426	5.61626	1.95137e-08	2.86967e-07	2L	CG17906
FBgn0038723	415.921	-0.783628	0.139667	-5.6107	2.01505e-08	2.95906e-07	3R	CG6195
FBgn0035246	1570.89	-0.763312	0.136079	-5.60935	2.03091e-08	2.97808e-07	3L	CG13928
FBgn0053229	492.117	-0.789379	0.14081	-5.60597	2.07097e-08	3.03249e-07	3L	CG33229
FBgn0037186	49.9452	-1.66171	0.296459	-5.6052	2.08014e-08	3.04157e-07	3L	CG11241
FBgn0283652	211.765	-0.867381	0.154773	-5.60423	2.09185e-08	3.05434e-07	2L	Rpp30
FBgn0011606	827.164	-0.968534	0.172861	-5.60296	2.10728e-08	3.07249e-07	X	Klp3A
FBgn0033539	630.631	-0.677142	0.120862	-5.60261	2.11153e-08	3.07432e-07	2R	Git
FBgn0031881	416.806	-1.1655	0.208138	-5.59964	2.148e-08	3.12298e-07	2L	MME1
FBgn0004868	1495.02	-0.758493	0.13567	-5.59071	2.26146e-08	3.28329e-07	2L	Gdi
FBgn0034354	394.436	-1.56267	0.279569	-5.58958	2.27624e-08	3.30006e-07	2R	GstE11
FBgn0041182	2595.57	1.08968	0.194968	5.58903	2.28339e-08	3.30576e-07	2L	Tep2
FBgn0034114	282.319	0.717215	0.128339	5.58846	2.29088e-08	3.31193e-07	2R	CG4282
FBgn0265312	52.4283	2.40558	0.431187	5.57897	2.41947e-08	3.49289e-07	2R	lncRNA:CR44285
FBgn0052068	365.112	-0.86184	0.15465	-5.57284	2.50621e-08	3.61304e-07	3L	Adi1
FBgn0031745	24.5166	3.19394	0.573228	5.57185	2.5205e-08	3.62853e-07	2L	rau
FBgn0050187	702.313	-1.01319	0.181864	-5.57114	2.53081e-08	3.63826e-07	2R	CG30187
FBgn0085405	168.821	-1.17097	0.210264	-5.56904	2.56142e-08	3.67711e-07	3R	CG34376
FBgn0032652	14.3804	7.00413	1.25777	5.56867	2.5669e-08	3.67982e-07	2L	CG6870
FBgn0028380	1018.14	0.982815	0.176966	5.55368	2.79713e-08	4.00428e-07	3L	fal
FBgn0013272	1701.15	-1.39628	0.251574	-5.55017	2.85393e-08	4.07635e-07	2R	Gp150
FBgn0001258	16604.6	-1.75497	0.316207	-5.55008	2.85543e-08	4.07635e-07	3L	Ldh
FBgn0033374	994.125	-0.947962	0.17083	-5.54915	2.87057e-08	4.09226e-07	2R	CG13741
FBgn0039304	861.897	-0.794731	0.143288	-5.54638	2.91651e-08	4.15197e-07	3R	CG10425
FBgn0029891	872.98	-0.505793	0.0912214	-5.54468	2.94495e-08	4.18665e-07	X	Pink1
FBgn0037657	982.814	0.652206	0.117652	5.54351	2.96471e-08	4.2089e-07	3R	hyx
FBgn0034502	229.978	2.00911	0.36249	5.54253	2.98132e-08	4.22663e-07	2R	CG13871
FBgn0038223	319.538	-0.739959	0.133525	-5.54172	2.99516e-08	4.24039e-07	3R	Afti
FBgn0267252	59.2803	2.65288	0.479092	5.5373	3.07175e-08	4.34282e-07	2L	Ggamma30A
FBgn0264384	33.12	-2.14043	0.386806	-5.53361	3.13713e-08	4.42914e-07	X	lncRNA:CR43836
FBgn0030628	1094.5	-0.676647	0.122397	-5.5283	3.23351e-08	4.55894e-07	X	CG9114
FBgn0031302	28.8337	-3.6215	0.656123	-5.51954	3.39896e-08	4.78563e-07	2L	CG14340
FBgn0039045	495.185	1.65582	0.300011	5.51919	3.40563e-08	4.78844e-07	3R	CG17119
FBgn0023143	7736	0.400827	0.0726416	5.51787	3.43136e-08	4.818e-07	2R	Uba1
FBgn0037270	4586.22	-0.597306	0.108281	-5.51626	3.46285e-08	4.85557e-07	3R	eIF3f1
FBgn0037955	612.844	-0.786859	0.142697	-5.5142	3.50376e-08	4.90622e-07	3R	Kyat
FBgn0039620	23.8805	3.83417	0.695605	5.51199	3.54802e-08	4.96143e-07	3R	wat
FBgn0261545	688.013	0.868044	0.157568	5.50901	3.6086e-08	5.03926e-07	2R	CG42663
FBgn0038827	710.798	-0.610146	0.110764	-5.50851	3.61889e-08	5.04675e-07	3R	Fancd2
FBgn0267435	119.499	-1.18418	0.215132	-5.50446	3.70303e-08	5.15707e-07	3R	chp
FBgn0033483	428.251	2.12371	0.386168	5.49945	3.80979e-08	5.29577e-07	2R	egr
FBgn0036237	573.408	-0.726691	0.132142	-5.4993	3.81296e-08	5.29577e-07	3L	viaf
FBgn0262582	2602.76	0.683205	0.124267	5.49787	3.84397e-08	5.33162e-07	3R	cic
FBgn0053116	436.419	-0.822147	0.149551	-5.49742	3.8538e-08	5.33803e-07	2L	CG33116
FBgn0013679	6736.58	1.32238	0.241168	5.48322	4.17651e-08	5.77722e-07	mitochondrion_genome	ND1
FBgn0013997	1250.12	-1.36767	0.249473	-5.48223	4.19988e-08	5.80173e-07	3L	Nrx-IV
FBgn0262570	48.8549	2.63295	0.480342	5.4814	4.21962e-08	5.82114e-07	2R	CG43110
FBgn0265042	46.1442	2.17803	0.39794	5.47325	4.41864e-08	6.08751e-07	3R	Irk1
FBgn0027094	3858.81	-0.592292	0.108338	-5.46707	4.57537e-08	6.29497e-07	2L	AlaRS
FBgn0000439	27.495	5.38246	0.984778	5.46566	4.6118e-08	6.33658e-07	3R	Dfd
FBgn0040346	527.933	-0.786422	0.143938	-5.46363	4.66496e-08	6.40105e-07	X	CG3704
FBgn0033649	115.434	1.47715	0.270374	5.46334	4.67247e-08	6.40278e-07	2R	pyr
FBgn0052195	1051.15	2.80697	0.513843	5.46271	4.68932e-08	6.41729e-07	3L	CG32195
FBgn0260794	12901.5	0.593459	0.108672	5.46099	4.73475e-08	6.47083e-07	3R	ctrip
FBgn0031769	660.025	-1.09158	0.200004	-5.4578	4.82068e-08	6.5795e-07	2L	CG9135
FBgn0039870	362.048	-0.89309	0.163665	-5.45681	4.84752e-08	6.60733e-07	3R	CG1896
FBgn0031740	365.969	-0.838555	0.153814	-5.45175	4.98775e-08	6.78944e-07	2L	CG7239
FBgn0266446	30.2115	4.65175	0.853355	5.45114	5.00493e-08	6.80378e-07	3R	CG45076
FBgn0032586	4547.75	1.07271	0.196964	5.44622	5.14524e-08	6.98526e-07	2L	Tpr2
FBgn0040080	1278.83	-0.760764	0.139806	-5.44155	5.28177e-08	7.14966e-07	3R	pins
FBgn0263006	5885.24	0.483143	0.0887873	5.44158	5.28115e-08	7.14966e-07	2R	SERCA
FBgn0021906	829.387	-0.803377	0.147642	-5.44137	5.28726e-08	7.14966e-07	2L	RFeSP
FBgn0000395	1098.05	1.52906	0.281234	5.43698	5.41921e-08	7.31844e-07	2R	cv-2
FBgn0000283	2609.93	-0.549042	0.101031	-5.43437	5.49898e-08	7.41638e-07	3R	Cp190
FBgn0037138	1771.72	-1.07277	0.197536	-5.43073	5.61246e-08	7.55949e-07	3L	P5CDh1
FBgn0261260	81.6926	3.38927	0.625061	5.4223	5.88367e-08	7.91438e-07	X	mgl
FBgn0061515	2778.41	-0.790973	0.145896	-5.4215	5.9102e-08	7.93965e-07	3L	endos
FBgn0029006	1763.25	0.519094	0.095797	5.41869	6.0037e-08	8.05471e-07	2R	Smurf
FBgn0031247	223.878	-0.872879	0.161115	-5.41775	6.03526e-08	8.08031e-07	2L	CG11562
FBgn0030485	473.555	-0.72907	0.134573	-5.41766	6.03855e-08	8.08031e-07	X	CG1998
FBgn0003502	1266.14	0.968372	0.178804	5.41583	6.10057e-08	8.14051e-07	2L	Btk29A
FBgn0034005	27.4537	4.05604	0.748934	5.41576	6.103e-08	8.14051e-07	2R	ItgaPS4
FBgn0034936	935.399	-0.720053	0.132958	-5.41563	6.10737e-08	8.14051e-07	2R	Stoml2
FBgn0005612	457.037	-0.72944	0.134744	-5.41351	6.18007e-08	8.22672e-07	2R	Sox14
FBgn0033584	533.726	-1.49379	0.276199	-5.40838	6.3596e-08	8.45472e-07	2R	CG7737
FBgn0036165	612.362	1.35467	0.250589	5.40595	6.44674e-08	8.55947e-07	3L	chrb
FBgn0030340	27.5739	4.62563	0.855978	5.40391	6.52028e-08	8.64591e-07	X	CG15740
FBgn0034931	136.939	-1.30046	0.240789	-5.40082	6.63351e-08	8.77923e-07	2R	CG2812
FBgn0027556	809.177	2.02224	0.37444	5.4007	6.63795e-08	8.77923e-07	X	CG4928
FBgn0035713	1275.69	-0.585836	0.10851	-5.39891	6.70465e-08	8.85601e-07	3L	velo
FBgn0040793	1095.54	-0.941427	0.17443	-5.39715	6.77086e-08	8.93196e-07	3L	CG7630
FBgn0015222	12932.8	-1.56684	0.290452	-5.39449	6.8717e-08	9.05333e-07	3R	Fer1HCH
FBgn0040001	667.506	1.14121	0.211574	5.39391	6.89416e-08	9.07126e-07	3L	FASN3
FBgn0083940	43.7644	1.62775	0.301824	5.39304	6.92764e-08	9.10363e-07	X	RhoU
FBgn0051324	1296.77	1.26348	0.234561	5.38659	7.18064e-08	9.42402e-07	3R	CG31324
FBgn0053970	72.6742	7.4903	1.39089	5.38526	7.23416e-08	9.48211e-07	3R	CG33970
FBgn0004888	2261.41	-0.574596	0.106713	-5.38448	7.26543e-08	9.51095e-07	3L	Scsalpha1
FBgn0026787	559.264	1.08047	0.200958	5.37657	7.59184e-08	9.92556e-07	2L	Nhe1
FBgn0042085	1476.13	-0.487046	0.0906974	-5.37001	7.8732e-08	1.02803e-06	2R	Bap170
FBgn0029733	546.503	-1.19396	0.222761	-5.35984	8.32958e-08	1.08594e-06	X	CG6927
FBgn0032139	29.6325	3.68316	0.687206	5.35962	8.33966e-08	1.08594e-06	2L	CG13116
FBgn0034878	946.061	-0.809863	0.15111	-5.35943	8.3485e-08	1.08594e-06	2R	pita
FBgn0250867	589.971	1.3111	0.244832	5.3551	8.5507e-08	1.11083e-06	2L	CG42238
FBgn0002552	509.256	-0.627448	0.117185	-5.35433	8.58728e-08	1.11417e-06	2R	lin
FBgn0029800	277.687	-0.988685	0.184702	-5.35285	8.65785e-08	1.12049e-06	X	lin-52
FBgn0259935	58.3294	-1.57289	0.293841	-5.35288	8.65668e-08	1.12049e-06	3L	CG42458
FBgn0263118	139.864	2.62423	0.490458	5.35057	8.76762e-08	1.13327e-06	3R	tx
FBgn0016080	334.873	-1.02596	0.191793	-5.34929	8.82976e-08	1.13986e-06	X	NA
FBgn0033357	903.811	-1.07897	0.201729	-5.34861	8.86332e-08	1.14276e-06	2R	Tom7
FBgn0040010	639.643	0.927542	0.173469	5.34703	8.94079e-08	1.15129e-06	2L	CG17493
FBgn0033949	31.163	2.71995	0.508819	5.3456	9.01161e-08	1.15896e-06	2R	Had2
FBgn0028936	655.089	3.35259	0.627889	5.33946	9.3223e-08	1.19741e-06	2L	NimB5
FBgn0085399	14.7359	3.39424	0.635861	5.33802	9.39697e-08	1.20549e-06	2R	CG34370
FBgn0086695	575.222	-0.653246	0.122429	-5.3357	9.51744e-08	1.21942e-06	3R	hd
FBgn0085582	83.6723	1.41103	0.264474	5.33524	9.54194e-08	1.22103e-06	2R	lncRNA:CR41257
FBgn0262579	1377.38	1.07273	0.201141	5.33324	9.64771e-08	1.23303e-06	3L	Ect4
FBgn0036909	298.879	-0.823718	0.154489	-5.33187	9.72039e-08	1.24077e-06	3L	Ccdc58
FBgn0005638	19.6678	3.18272	0.596994	5.33124	9.75421e-08	1.24354e-06	2R	slbo
FBgn0037723	347.975	1.1193	0.210249	5.3237	1.01679e-07	1.29468e-06	3R	SpdS
FBgn0037435	181.703	-0.793567	0.149147	-5.32072	1.03357e-07	1.31441e-06	3R	CG18048
FBgn0036240	418.504	1.12909	0.212243	5.31979	1.03889e-07	1.31953e-06	3L	CG6928
FBgn0036623	720.763	-0.937505	0.176419	-5.31408	1.07199e-07	1.35989e-06	3L	Agpat3
FBgn0052066	2554.13	1.01723	0.191547	5.31062	1.09255e-07	1.38426e-06	3L	CG32066
FBgn0264707	502.138	1.02267	0.192806	5.30414	1.13203e-07	1.43251e-06	3L	RhoGEF3
FBgn0261004	951.4	-0.609405	0.114933	-5.30227	1.14371e-07	1.4455e-06	3R	asl
FBgn0033672	913.9	-0.74855	0.141285	-5.29816	1.16977e-07	1.47662e-06	2R	rho-7
FBgn0011361	2126.37	-0.593923	0.112184	-5.29417	1.19559e-07	1.50736e-06	3L	ND-ACP
FBgn0034914	2091.48	-0.68387	0.129191	-5.29347	1.20019e-07	1.51081e-06	2R	CG5554
FBgn0036099	512.261	-0.620717	0.117265	-5.2933	1.20128e-07	1.51081e-06	3L	CG11811
FBgn0026593	106.472	1.63645	0.309183	5.29282	1.20443e-07	1.51291e-06	3L	CG5707
FBgn0015776	2863.67	0.873241	0.165248	5.28443	1.26097e-07	1.58201e-06	2L	nrv1
FBgn0036913	2557.05	0.994808	0.188287	5.28348	1.26754e-07	1.5883e-06	3L	Usp32
FBgn0267605	29.1056	2.23934	0.423952	5.28207	1.27735e-07	1.59864e-06	3L	asRNA:CR45943
FBgn0033706	9.54142	7.0171	1.32896	5.28014	1.29086e-07	1.61358e-06	2R	Vha36-2
FBgn0000711	1696.2	0.939273	0.177926	5.27901	1.29883e-07	1.62156e-06	X	flw
FBgn0027786	1074.47	-0.82833	0.156955	-5.27749	1.30962e-07	1.63304e-06	3L	Mtch
FBgn0052512	2005.13	-1.56769	0.297078	-5.27702	1.31303e-07	1.63531e-06	X	CG32512
FBgn0031298	992.791	-0.670868	0.127199	-5.27415	1.33371e-07	1.65905e-06	2L	Atg4a
FBgn0002609	60.2068	2.01612	0.382327	5.2733	1.33992e-07	1.66147e-06	3R	E(spl)m3-HLH
FBgn0040623	432.098	-1.08227	0.205233	-5.27337	1.33938e-07	1.66147e-06	3R	Spase12
FBgn0027548	884.927	-0.578459	0.109698	-5.27322	1.34052e-07	1.66147e-06	2R	nito
FBgn0264491	2724.78	0.893378	0.16943	5.27285	1.34321e-07	1.66279e-06	3R	how
FBgn0264001	45.2355	1.49147	0.282921	5.27167	1.35187e-07	1.67149e-06	3L	bru3
FBgn0261403	3216.46	0.795074	0.150874	5.2698	1.36574e-07	1.6866e-06	2R	sxc
FBgn0030505	1555.76	1.00981	0.191747	5.26635	1.3916e-07	1.71648e-06	X	NFAT
FBgn0035046	373.789	-0.722303	0.137204	-5.26444	1.40616e-07	1.73235e-06	2R	ND-19
FBgn0260006	65.7242	3.25122	0.618197	5.2592	1.44683e-07	1.78032e-06	X	drd
FBgn0050052	42.3297	2.78484	0.529639	5.258	1.45631e-07	1.78984e-06	2R	Obp49a
FBgn0030396	286.876	1.44004	0.274042	5.2548	1.48187e-07	1.81906e-06	X	CG2556
FBgn0033756	1705.16	1.43165	0.272516	5.25346	1.49268e-07	1.83014e-06	2R	CG17760
FBgn0035245	207.611	-1.42995	0.272367	-5.25008	1.52031e-07	1.86179e-06	3L	GC
FBgn0000064	15509.1	-0.984518	0.187629	-5.24714	1.54474e-07	1.88945e-06	3R	Ald1
FBgn0263042	18.5657	3.10958	0.593469	5.23966	1.60871e-07	1.96534e-06	3L	CG43337
FBgn0030672	5980.48	0.63339	0.120982	5.23538	1.64643e-07	2.00903e-06	X	CG9281
FBgn0000052	1468.02	-0.573805	0.109688	-5.23125	1.68363e-07	2.05199e-06	2L	Pfas
FBgn0011739	2435.47	0.706856	0.135171	5.22936	1.70099e-07	2.07068e-06	3R	wts
FBgn0040070	3599.17	0.830699	0.158884	5.22832	1.71053e-07	2.07983e-06	2L	Trx-2
FBgn0031401	399.326	-0.821314	0.157101	-5.22794	1.7141e-07	2.0817e-06	2L	papi
FBgn0036299	306.492	-1.07848	0.206534	-5.22181	1.77181e-07	2.14924e-06	3L	Tsf2
FBgn0266028	65.1198	-1.21538	0.232861	-5.21932	1.79583e-07	2.1758e-06	2L	asRNA:CR44793
FBgn0261429	444.132	0.87073	0.166846	5.21875	1.80133e-07	2.17988e-06	2R	lncRNA:CR42646
FBgn0284435	1618.41	0.947119	0.181722	5.2119	1.86921e-07	2.25936e-06	X	tyn
FBgn0039467	523.319	2.80219	0.537772	5.21075	1.88077e-07	2.27066e-06	3R	CG14253
FBgn0020376	21.3113	6.89089	1.32301	5.20848	1.90389e-07	2.29587e-06	2L	Sr-CIII
FBgn0035232	1933.68	-0.888147	0.170574	-5.20683	1.92095e-07	2.31371e-06	3L	CG12099
FBgn0038105	767.98	-0.657063	0.126275	-5.20342	1.95659e-07	2.35387e-06	3R	yellow-f2
FBgn0040340	778.231	-0.974171	0.187307	-5.20092	1.98304e-07	2.38291e-06	X	TRAM
FBgn0051739	2453.56	-0.553841	0.106504	-5.20017	1.99106e-07	2.38974e-06	2L	AspRS-m
FBgn0261602	46714.2	0.535048	0.102934	5.19798	2.01466e-07	2.41524e-06	3L	RpL8
FBgn0003607	2723.8	-0.937534	0.180527	-5.19331	2.06582e-07	2.47368e-06	2L	Su(var)205
FBgn0261641	1586	-0.851175	0.163962	-5.19128	2.08848e-07	2.49789e-06	3R	CG42724
FBgn0015778	10134.3	-0.561067	0.10819	-5.18592	2.14953e-07	2.56791e-06	3R	rin
FBgn0032997	1203.19	1.07114	0.206829	5.1789	2.232e-07	2.66333e-06	2R	CG17486
FBgn0030999	30.2553	3.63659	0.702436	5.17711	2.25353e-07	2.68589e-06	X	Mur18B
FBgn0011206	214.463	2.11994	0.409734	5.17393	2.29219e-07	2.7288e-06	3L	bol
FBgn0011828	825.581	1.72718	0.333862	5.17332	2.29967e-07	2.73453e-06	3L	Pxn
FBgn0023416	343.881	2.28794	0.44236	5.17212	2.31451e-07	2.74899e-06	2L	Ac3
FBgn0038080	426.565	-0.982076	0.19002	-5.16827	2.36275e-07	2.80303e-06	3R	CG12279
FBgn0261703	1470.76	0.935951	0.181191	5.16555	2.39738e-07	2.84082e-06	X	gce
FBgn0031645	127.607	1.51177	0.29269	5.1651	2.40315e-07	2.84438e-06	2L	CG3036
FBgn0035464	480.72	-0.803847	0.155645	-5.16462	2.4093e-07	2.84836e-06	3L	PIG-B
FBgn0030433	304.035	-0.733837	0.142129	-5.16316	2.4281e-07	2.86729e-06	X	mRpL49
FBgn0035146	37.5025	1.59952	0.309863	5.16203	2.44291e-07	2.88145e-06	3L	CG13893
FBgn0265778	958.209	-0.828168	0.160443	-5.16176	2.44642e-07	2.88228e-06	2L	PDZ-GEF
FBgn0250869	378.418	1.23718	0.239713	5.16108	2.45528e-07	2.8894e-06	X	CG42240
FBgn0053978	40.1424	1.69287	0.328098	5.15967	2.4739e-07	2.90797e-06	4	CG33978
FBgn0001296	343.833	-0.671586	0.130212	-5.15764	2.50076e-07	2.93282e-06	3R	kar
FBgn0027084	2112.73	-0.622009	0.120598	-5.15773	2.49962e-07	2.93282e-06	X	LysRS
FBgn0029820	1298.91	0.932905	0.180954	5.15547	2.53e-07	2.96371e-06	X	CG16721
FBgn0029997	497.667	-0.823655	0.159785	-5.15477	2.53943e-07	2.97136e-06	X	CG2258
FBgn0261873	161.571	1.51932	0.294875	5.15241	2.57157e-07	3.00554e-06	X	sdt
FBgn0043841	3714.13	1.87118	0.363226	5.15156	2.58333e-07	3.01584e-06	2L	vir-1
FBgn0021979	1152.26	-0.763181	0.148185	-5.15018	2.6023e-07	3.03453e-06	2R	l(2)k09913
FBgn0036199	926.076	-1.07993	0.209707	-5.1497	2.6091e-07	3.03901e-06	3L	Bmcp
FBgn0261383	929.707	0.632474	0.122894	5.14648	2.65416e-07	3.08798e-06	X	IntS6
FBgn0283535	7992.72	-0.51046	0.0992246	-5.14449	2.68246e-07	3.11738e-06	3R	Vha26
FBgn0033212	3109.56	0.909244	0.17696	5.13814	2.77472e-07	3.22094e-06	2R	LRR
FBgn0036552	13.5051	3.47103	0.675734	5.13668	2.79631e-07	3.24233e-06	3L	CG17028
FBgn0028993	19.0254	3.33971	0.650664	5.13276	2.85518e-07	3.30685e-06	3L	scro
FBgn0050000	896.983	-0.612609	0.11939	-5.13117	2.8794e-07	3.33113e-06	2R	GstT1
FBgn0029945	54.8183	-1.83873	0.358401	-5.13037	2.89172e-07	3.34161e-06	X	CG18155
FBgn0032772	22.8821	2.45197	0.478184	5.12766	2.93364e-07	3.38624e-06	2L	CG17350
FBgn0002593	30422	0.588263	0.114783	5.125	2.97545e-07	3.43063e-06	2L	RpLP1
FBgn0037020	659.323	0.604619	0.118027	5.12271	3.01169e-07	3.46852e-06	3L	Pex14
FBgn0031681	1826.22	0.81891	0.159976	5.11896	3.07224e-07	3.53032e-06	2L	Pgant5
FBgn0086031	32.7111	2.15384	0.420743	5.11912	3.06962e-07	3.53032e-06	2L	snoRNA:Me28S-U1230
FBgn0031170	587.617	0.925603	0.180836	5.11846	3.08048e-07	3.53582e-06	X	ABCA
FBgn0033528	453.196	-0.676732	0.132282	-5.11582	3.12377e-07	3.58151e-06	2R	trsn
FBgn0260789	973.207	-0.705913	0.138034	-5.11406	3.15313e-07	3.61113e-06	X	mxc
FBgn0033195	109.846	-0.964081	0.188557	-5.11295	3.17159e-07	3.62822e-06	2R	CG1360
FBgn0030724	710.762	-0.577149	0.112888	-5.11258	3.17792e-07	3.6314e-06	X	Nipsnap
FBgn0034059	343.817	-0.908273	0.177695	-5.11141	3.19757e-07	3.64979e-06	2R	CG8320
FBgn0025693	605.974	1.26389	0.247313	5.11048	3.2134e-07	3.66377e-06	2R	ZnT41F
FBgn0050183	219.012	-1.0328	0.202107	-5.11017	3.21869e-07	3.66573e-06	2R	CG30183
FBgn0014366	613.544	0.636394	0.124542	5.10986	3.22395e-07	3.66765e-06	3R	noi
FBgn0027951	1413.84	-0.528201	0.103387	-5.10894	3.23963e-07	3.6814e-06	3R	MTA1-like
FBgn0033351	532.048	-0.619132	0.121246	-5.1064	3.28359e-07	3.72722e-06	2R	AIMP1
FBgn0051174	42.4811	1.7445	0.341653	5.10605	3.2896e-07	3.72958e-06	3R	CG31174
FBgn0051075	698.279	-1.09618	0.214699	-5.10565	3.29658e-07	3.72958e-06	3R	CG31075
FBgn0030749	10970.7	0.974498	0.190864	5.10571	3.2956e-07	3.72958e-06	X	AnxB11
FBgn0003353	457.475	0.598361	0.117234	5.10397	3.32594e-07	3.75864e-06	2R	sei
FBgn0010803	1527.72	-0.620649	0.121608	-5.10367	3.33131e-07	3.76057e-06	3R	TrpRS
FBgn0033928	2144.37	0.876351	0.171727	5.10317	3.34019e-07	3.76645e-06	2R	Arc2
FBgn0027889	1435.36	-0.692471	0.13578	-5.09996	3.39717e-07	3.82648e-06	3R	ball
FBgn0002563	37.6157	-1.99071	0.390373	-5.09951	3.40536e-07	3.8315e-06	2L	Lsp1beta
FBgn0040534	163.669	-1.10079	0.215957	-5.09727	3.44595e-07	3.87292e-06	3R	Sf3b5
FBgn0266638	57.3027	3.37981	0.663117	5.09684	3.45364e-07	3.8773e-06	2R	asRNA:CR45145
FBgn0031086	83.6542	1.82865	0.358805	5.09652	3.45963e-07	3.87978e-06	X	fd19B
FBgn0083956	21.9911	2.90244	0.569559	5.09595	3.47004e-07	3.88721e-06	X	CG34120
FBgn0085468	635.826	-0.696225	0.136633	-5.0956	3.47642e-07	3.8901e-06	2R	ND-MWFE
FBgn0010225	4409.29	1.45191	0.28498	5.09476	3.4918e-07	3.90305e-06	3R	Gel
FBgn0086683	882.04	0.847135	0.166353	5.0924	3.53557e-07	3.94767e-06	2L	Spf45
FBgn0027329	5390.73	-0.671779	0.131925	-5.09212	3.54089e-07	3.9493e-06	X	CCT6
FBgn0052017	96.5791	2.76261	0.542555	5.09185	3.54581e-07	3.95049e-06	4	CG32017
FBgn0263593	1990.72	-1.04926	0.206081	-5.09151	3.5523e-07	3.95343e-06	2R	Lpin
FBgn0037633	566.564	-0.791694	0.155503	-5.09117	3.55856e-07	3.9561e-06	3R	CG9839
FBgn0038973	23.7847	-2.21468	0.435078	-5.09031	3.57471e-07	3.96975e-06	3R	Pebp1
FBgn0013726	4266.12	-0.976373	0.191931	-5.08711	3.63557e-07	4.03296e-06	2R	pnut
FBgn0020300	28.0543	2.71672	0.534193	5.08566	3.66352e-07	4.05957e-06	3L	geko
FBgn0034420	1310.62	1.03613	0.203867	5.08238	3.72731e-07	4.1258e-06	2R	CG10737
FBgn0039869	1221.12	-0.648881	0.127714	-5.08075	3.75947e-07	4.15691e-06	3R	CG1890
FBgn0050015	2872.34	0.72794	0.143512	5.07232	3.93003e-07	4.34082e-06	2R	CG30015
FBgn0030769	16.0922	3.78876	0.747511	5.0685	4.00955e-07	4.42388e-06	X	CG13012
FBgn0262736	14464.6	-0.67301	0.132802	-5.06778	4.02488e-07	4.43602e-06	2R	Vha16-1
FBgn0036007	3724.93	0.924533	0.182484	5.06637	4.05477e-07	4.46417e-06	3L	path
FBgn0021767	116.619	1.7192	0.33974	5.06033	4.18522e-07	4.60285e-06	X	org-1
FBgn0038638	69.5247	-1.61347	0.318969	-5.05838	4.22843e-07	4.64538e-06	3R	CG7702
FBgn0051660	80.7491	-2.01115	0.397723	-5.05666	4.26662e-07	4.68232e-06	2L	smog
FBgn0260779	433.866	-0.765999	0.151498	-5.05617	4.2775e-07	4.68924e-06	3R	GatA
FBgn0040305	739.16	-0.563892	0.111668	-5.04973	4.42443e-07	4.84513e-06	3L	MTF-1
FBgn0022338	3191.2	-0.921373	0.182504	-5.04852	4.45249e-07	4.87065e-06	3R	dnk
FBgn0020270	4223.93	-0.592158	0.117322	-5.04727	4.48168e-07	4.89736e-06	2L	mre11
FBgn0014455	1844.05	-0.544596	0.107976	-5.0437	4.56611e-07	4.9843e-06	X	Ahcy
FBgn0026432	487.111	0.717677	0.142439	5.03848	4.6924e-07	5.11672e-06	3L	Grip163
FBgn0028542	33.8042	4.35042	0.86358	5.03765	4.71276e-07	5.13345e-06	2L	NimB4
FBgn0031150	1055.51	0.954934	0.189668	5.03476	4.78458e-07	5.20615e-06	X	bves
FBgn0020764	351.502	-1.47948	0.293891	-5.03413	4.80035e-07	5.21777e-06	2R	Alas
FBgn0031183	525.881	0.765003	0.152088	5.03	4.90477e-07	5.32563e-06	X	CG14621
FBgn0087035	9683.8	0.76719	0.152568	5.0285	4.9434e-07	5.36189e-06	3L	AGO2
FBgn0035204	674.734	-0.753504	0.149994	-5.02356	5.07235e-07	5.49594e-06	3L	CG2277
FBgn0266676	29.7688	2.59657	0.51711	5.02131	5.13215e-07	5.55486e-06	3L	lncRNA:CR45166
FBgn0039215	1250.39	-0.623052	0.124177	-5.01743	5.2366e-07	5.66194e-06	3R	CG6695
FBgn0033177	871.547	0.699942	0.139514	5.01701	5.24805e-07	5.66834e-06	2R	CG11141
FBgn0001248	4730.98	-0.719888	0.143534	-5.01546	5.29079e-07	5.70848e-06	3L	Idh
FBgn0032402	331.361	1.49653	0.298433	5.01464	5.31334e-07	5.72679e-06	2L	CG14945
FBgn0052100	281.167	-0.859973	0.171596	-5.01161	5.39771e-07	5.81162e-06	3L	CG32100
FBgn0046692	423.382	1.33007	0.265502	5.00962	5.45368e-07	5.86571e-06	2R	Stlk
FBgn0011016	2023.84	-0.887348	0.177196	-5.00772	5.50789e-07	5.91781e-06	3L	SsRbeta
FBgn0019644	1257.85	-0.560862	0.11203	-5.00636	5.54689e-07	5.95347e-06	3L	ATPsynB
FBgn0034029	492.909	-0.698584	0.139577	-5.005	5.58608e-07	5.98926e-06	2R	eIF2Bgamma
FBgn0042180	196.946	0.794629	0.158805	5.0038	5.62114e-07	6.02055e-06	2R	CG18870
FBgn0031118	2586.47	0.882351	0.17636	5.00313	5.64059e-07	6.03508e-06	X	RhoGAP19D
FBgn0030938	30.4541	-1.74299	0.348432	-5.00238	5.66276e-07	6.05248e-06	X	CG15047
FBgn0036462	1159.72	-0.549926	0.110045	-4.99728	5.81455e-07	6.20824e-06	3L	mRpL39
FBgn0038387	197.251	-0.813362	0.162908	-4.99277	5.95197e-07	6.34836e-06	3R	blp
FBgn0034968	17127.5	0.58487	0.117241	4.98862	6.08118e-07	6.47943e-06	2R	RpL12
FBgn0039941	129.943	-0.979834	0.196465	-4.98733	6.12202e-07	6.51617e-06	X	CG17167
FBgn0020493	801.222	0.843252	0.169152	4.98518	6.19036e-07	6.58207e-06	3R	Dad
FBgn0003093	730.345	-0.580884	0.116586	-4.98244	6.27867e-07	6.66906e-06	3R	Pkc98E
FBgn0004598	1159.36	-1.04518	0.209784	-4.98215	6.28805e-07	6.6721e-06	X	Fur2
FBgn0030034	1057.49	-0.78968	0.158556	-4.98045	6.34357e-07	6.71783e-06	X	CG10555
FBgn0261574	3947.06	-0.629563	0.126407	-4.98043	6.34426e-07	6.71783e-06	3L	kug
FBgn0262636	30.4301	3.68699	0.740876	4.97653	6.47356e-07	6.84768e-06	4	dati
FBgn0031678	1724.67	-0.907807	0.182808	-4.96589	6.83869e-07	7.22645e-06	2L	Nepl3
FBgn0013773	378.664	-0.839879	0.169151	-4.96527	6.86066e-07	7.2422e-06	2R	Cyp6a22
FBgn0033086	240.665	-0.840098	0.169396	-4.95939	7.07155e-07	7.45714e-06	2R	CG9410
FBgn0030596	14.9394	3.42324	0.690748	4.95586	7.20129e-07	7.58615e-06	X	CG12398
FBgn0035529	239.54	-0.836259	0.168767	-4.95511	7.22892e-07	7.60743e-06	3L	Fdx2
FBgn0037230	15.6762	2.81984	0.569463	4.95175	7.35493e-07	7.72161e-06	3R	Nepl11
FBgn0038475	1305.48	0.84016	0.169668	4.9518	7.353e-07	7.72161e-06	3R	Keap1
FBgn0039970	1462.77	-0.610056	0.123206	-4.9515	7.36438e-07	7.72161e-06	2R	CG17508
FBgn0031450	790.472	-0.568628	0.114842	-4.95142	7.36755e-07	7.72161e-06	2L	Hrs
FBgn0051601	17.1545	3.26559	0.660078	4.94727	7.52613e-07	7.87975e-06	2L	CG31601
FBgn0261836	3872.11	0.996969	0.201555	4.94639	7.56042e-07	7.90758e-06	2L	Msp300
FBgn0030073	139.409	1.20436	0.243766	4.94066	7.78587e-07	8.13508e-06	X	CG10962
FBgn0050047	71.468	-1.28079	0.259304	-4.93933	7.83897e-07	8.18222e-06	2R	CG30047
FBgn0031987	206.574	-0.901421	0.182564	-4.93758	7.9099e-07	8.24786e-06	2L	CG12375
FBgn0031636	47.4294	1.77319	0.359258	4.9357	7.98652e-07	8.3193e-06	2L	CG12194
FBgn0039580	1099.65	-0.52129	0.105624	-4.93534	8.00119e-07	8.32611e-06	3R	Gfat2
FBgn0283510	386.244	-0.620822	0.125819	-4.93425	8.04578e-07	8.36402e-06	2R	Pal1
FBgn0001189	656.901	-0.540516	0.109569	-4.93311	8.09297e-07	8.40456e-06	X	hfw
FBgn0267488	819.032	-1.15753	0.23466	-4.93278	8.10673e-07	8.41032e-06	2L	Mcr
FBgn0000253	24343.8	1.0123	0.205607	4.92346	8.50288e-07	8.81065e-06	2R	Cam
FBgn0053230	1063.38	1.46455	0.297473	4.9233	8.5098e-07	8.81065e-06	3L	CG33230
FBgn0267278	96.2515	-1.29461	0.263102	-4.92054	8.63043e-07	8.92653e-06	X	asRNA:CR45714
FBgn0031651	264.511	-0.713801	0.145141	-4.91799	8.7437e-07	9.03457e-06	2L	mRpL24
FBgn0262820	130.749	-1.54052	0.313274	-4.91748	8.76655e-07	9.04906e-06	2R	CG43191
FBgn0265726	23.404	2.79579	0.569038	4.91319	8.96066e-07	9.24012e-06	X	Nna1
FBgn0037305	614.807	-0.666458	0.135665	-4.91252	8.99122e-07	9.26232e-06	3R	CG12173
FBgn0035557	8.60055	4.48952	0.914241	4.91065	9.07732e-07	9.34162e-06	3L	CG11353
FBgn0052368	1018.94	1.55184	0.316091	4.90946	9.13259e-07	9.38907e-06	3L	CG32368
FBgn0000565	1898.06	1.41469	0.288245	4.90792	9.20463e-07	9.45366e-06	3L	Eip71CD
FBgn0033446	151.33	2.1333	0.434768	4.90675	9.25982e-07	9.50082e-06	2R	CG1648
FBgn0039265	1198.86	-1.10392	0.225059	-4.90505	9.34024e-07	9.57375e-06	3R	CG11790
FBgn0029959	424.618	-1.08914	0.222087	-4.9041	9.38562e-07	9.61065e-06	X	Rab39
FBgn0283477	1769.45	-0.794863	0.162094	-4.90371	9.40413e-07	9.62e-06	3R	SF2
FBgn0035410	1256.37	-0.813757	0.16599	-4.90244	9.46522e-07	9.67283e-06	3L	CG14964
FBgn0266084	702.257	1.59792	0.325969	4.90207	9.48323e-07	9.68158e-06	3L	Fhos
FBgn0050105	201.08	-0.934712	0.190691	-4.90172	9.50017e-07	9.68171e-06	2R	CG30105
FBgn0036646	159.947	-0.992706	0.202524	-4.90168	9.50224e-07	9.68171e-06	3L	CR18217
FBgn0016041	1833.12	-0.686262	0.140135	-4.89714	9.72427e-07	9.88827e-06	X	Tom40
FBgn0264346	15.8067	6.83101	1.39485	4.89731	9.71571e-07	9.88827e-06	2L	lncRNA:CR43802
FBgn0039300	26359	0.521666	0.106597	4.89382	9.88964e-07	1.00465e-05	3R	RpS27
FBgn0266347	132.877	1.01698	0.207829	4.89336	9.91282e-07	1.006e-05	3L	nAChRalpha4
FBgn0259785	1929.3	-0.707713	0.144645	-4.89276	9.94331e-07	1.0081e-05	3L	pzg
FBgn0265048	2920.74	-1.3043	0.266601	-4.89232	9.96524e-07	1.00932e-05	3R	cv-d
FBgn0028988	155.667	-1.16498	0.238373	-4.88722	1.02268e-06	1.03479e-05	2R	Spn42Dd
FBgn0027547	1607.15	-0.85013	0.173977	-4.88644	1.02675e-06	1.03789e-05	3L	CG1927
FBgn0032727	708.005	-0.890689	0.182322	-4.88525	1.033e-06	1.04318e-05	2L	CG10623
FBgn0000412	3125.56	-0.808303	0.165554	-4.88242	1.0479e-06	1.05511e-05	3R	D1
FBgn0039756	123.689	2.45653	0.503121	4.88259	1.04701e-06	1.05511e-05	3R	CG9743
FBgn0011211	12140.8	-0.746086	0.152803	-4.88268	1.04655e-06	1.05511e-05	2R	blw
FBgn0033919	253.182	-0.989025	0.202603	-4.8816	1.0523e-06	1.05731e-05	2R	CG8547
FBgn0261592	40454.2	0.58712	0.120276	4.88143	1.05318e-06	1.05731e-05	X	RpS6
FBgn0031522	39.0672	3.83285	0.785174	4.88153	1.05267e-06	1.05731e-05	2L	CG3285
FBgn0025571	842.098	-0.624975	0.12809	-4.87917	1.06531e-06	1.06844e-05	3R	SF1
FBgn0086693	44.5574	-1.63366	0.334904	-4.87799	1.07174e-06	1.07384e-05	X	iav
FBgn0033321	104.223	1.04162	0.213562	4.87737	1.07512e-06	1.07617e-05	2R	CG8738
FBgn0034576	633.14	-0.737854	0.151306	-4.87658	1.07943e-06	1.07943e-05	2R	ND-B14.7
FBgn0031144	953.038	-0.547772	0.112348	-4.87569	1.08427e-06	1.08321e-05	X	CG1529
FBgn0000075	20.3622	3.21053	0.658656	4.87437	1.09154e-06	1.08942e-05	2L	amd
FBgn0004034	103.592	3.51689	0.72164	4.87346	1.09658e-06	1.09338e-05	X	y
FBgn0039207	1709.85	-0.591253	0.121328	-4.87316	1.09826e-06	1.09399e-05	3R	CG5789
FBgn0010638	1833.5	-0.768491	0.157714	-4.87268	1.10096e-06	1.09562e-05	2R	Sec61beta
FBgn0039025	198.314	1.5163	0.311231	4.87194	1.1051e-06	1.09867e-05	3R	Usp12-46
FBgn0037655	1716.53	-0.55637	0.114258	-4.86942	1.11928e-06	1.11169e-05	3R	Kcmf1
FBgn0017567	657.228	-0.604946	0.124246	-4.86894	1.12201e-06	1.11332e-05	3R	ND-23
FBgn0086687	8183.11	-0.714771	0.146817	-4.86846	1.12471e-06	1.11477e-05	3R	Desat1
FBgn0259683	1613.22	2.90279	0.596263	4.8683	1.12565e-06	1.11477e-05	2L	Ir40a
FBgn0027594	1121.58	1.04149	0.21398	4.86722	1.13177e-06	1.11975e-05	3L	drpr
FBgn0037644	838.467	-0.577691	0.118739	-4.86521	1.14335e-06	1.13012e-05	3R	CG11964
FBgn0267505	245.617	1.11701	0.229788	4.86105	1.16764e-06	1.15301e-05	rDNA	pre-rRNA:CR45845
FBgn0034527	439.97	1.04799	0.215642	4.85988	1.17456e-06	1.15782e-05	2R	CG9945
FBgn0053503	50.4406	1.9609	0.40349	4.85985	1.17477e-06	1.15782e-05	2R	Cyp12d1-d
FBgn0031637	1058.81	-0.592096	0.121947	-4.85536	1.20171e-06	1.18324e-05	2L	mxt
FBgn0260987	2339.16	0.819184	0.168752	4.85437	1.20772e-06	1.18802e-05	3L	vtd
FBgn0033624	263.352	-0.689589	0.142087	-4.85329	1.21429e-06	1.19333e-05	2R	CG12384
FBgn0036733	291.939	-0.635846	0.131021	-4.853	1.21611e-06	1.19397e-05	3L	U4-U6-60K
FBgn0027654	36.1915	2.0029	0.412754	4.85251	1.21907e-06	1.19574e-05	3R	jdp
FBgn0039464	898.589	-1.37504	0.283435	-4.85134	1.22628e-06	1.20166e-05	3R	CG6330
FBgn0039411	8544.66	0.700341	0.144413	4.84956	1.23738e-06	1.21138e-05	3R	dysf
FBgn0026313	1991.67	0.38814	0.08008	4.8469	1.25405e-06	1.22653e-05	X	X11L
FBgn0042135	719.274	0.968922	0.200017	4.84419	1.27127e-06	1.24219e-05	2R	Gdap2
FBgn0037580	4045.36	-0.709633	0.146531	-4.84287	1.27975e-06	1.24928e-05	3R	DppIII
FBgn0265191	740.274	-1.01882	0.210392	-4.8425	1.28218e-06	1.25046e-05	2R	Gyg
FBgn0015040	57.8279	-1.74979	0.361624	-4.83871	1.30685e-06	1.27331e-05	2R	Cyp9c1
FBgn0259139	2244.41	-0.58661	0.121243	-4.83831	1.30949e-06	1.27467e-05	3R	glo
FBgn0004066	2306.74	-0.414494	0.0856951	-4.83684	1.31918e-06	1.28288e-05	X	Prosalpha4
FBgn0002783	2044.11	-0.376011	0.0777473	-4.83632	1.32266e-06	1.28504e-05	3R	mor
FBgn0037921	276.394	-0.834028	0.172488	-4.83528	1.32957e-06	1.29054e-05	3R	CG6808
FBgn0086906	64.6429	1.94312	0.402007	4.83355	1.3412e-06	1.30059e-05	3L	sls
FBgn0000150	5673.15	-0.981419	0.203107	-4.83203	1.35147e-06	1.30932e-05	3R	awd
FBgn0039189	1440.67	-0.846039	0.175135	-4.83077	1.36005e-06	1.31639e-05	3R	CG18528
FBgn0040299	23.4146	2.82094	0.584015	4.83024	1.36367e-06	1.31864e-05	2L	Myo28B1
FBgn0030460	300.063	-0.679596	0.140728	-4.82915	1.37116e-06	1.32464e-05	X	Coq5
FBgn0266732	32.9525	2.42442	0.502134	4.82824	1.37745e-06	1.32946e-05	3R	asRNA:CR45205
FBgn0036945	17.2265	4.07588	0.84458	4.82593	1.39351e-06	1.3437e-05	3L	Ssk
FBgn0000279	17.9943	3.48701	0.722683	4.82509	1.3994e-06	1.3481e-05	3R	CecC
FBgn0283437	6.13788	6.51082	1.3495	4.82461	1.40274e-06	1.35006e-05	2R	PPO1
FBgn0025382	412.152	-0.679098	0.140922	-4.81895	1.44318e-06	1.38638e-05	X	Rab27
FBgn0016075	6199.24	2.6338	0.546533	4.8191	1.44204e-06	1.38638e-05	2L	vkg
FBgn0010226	110.406	1.85568	0.385097	4.81872	1.44482e-06	1.38665e-05	2R	GstS1
FBgn0082582	746.975	-1.25629	0.260741	-4.81815	1.44898e-06	1.38837e-05	3R	tmod
FBgn0034743	21497.2	0.515225	0.106935	4.8181	1.44933e-06	1.38837e-05	2R	RpS16
FBgn0034488	846.653	-0.463351	0.096194	-4.81684	1.45853e-06	1.39458e-05	2R	Hacl
FBgn0264554	111.394	-1.36361	0.28309	-4.81688	1.45818e-06	1.39458e-05	3L	asRNA:CR43933
FBgn0262598	532.236	-1.12175	0.233016	-4.81406	1.47894e-06	1.41278e-05	2L	mtsh
FBgn0011260	922.086	-1.25294	0.260387	-4.81183	1.49553e-06	1.4273e-05	2R	Sema2a
FBgn0032397	1253.28	-0.574384	0.119384	-4.81124	1.49995e-06	1.42886e-05	2L	Tom70
FBgn0085317	96.018	-1.45489	0.302386	-4.81137	1.49897e-06	1.42886e-05	3R	CG34288
FBgn0032294	38.9203	-2.66339	0.554293	-4.80503	1.54731e-06	1.47261e-05	2L	Vha16-5
FBgn0050054	336.221	0.993284	0.206745	4.8044	1.5522e-06	1.47589e-05	2R	CG30054
FBgn0285947	28761.6	0.497303	0.103561	4.80204	1.5706e-06	1.492e-05	X	RpS10b
FBgn0034245	674.373	-0.682003	0.142179	-4.7968	1.6122e-06	1.53009e-05	2R	UQCR-6.4
FBgn0015872	8.21678	6.33931	1.3218	4.79596	1.61896e-06	1.53367e-05	2R	Drip
FBgn0264607	2754.47	1.02369	0.213441	4.7961	1.61788e-06	1.53367e-05	4	CaMKII
FBgn0034187	323.534	-0.764398	0.15946	-4.79366	1.63768e-06	1.54997e-05	2R	CG6967
FBgn0002069	7689.99	-1.01509	0.212021	-4.78767	1.68727e-06	1.59543e-05	2R	AspRS
FBgn0031910	145.39	3.88145	0.810931	4.78641	1.69789e-06	1.604e-05	2L	CG15818
FBgn0037377	325.225	-1.02664	0.214558	-4.78492	1.71053e-06	1.61445e-05	3R	CG1218
FBgn0030904	170.677	3.58642	0.749573	4.78463	1.71305e-06	1.61535e-05	X	upd2
FBgn0259984	4688.14	1.05931	0.221462	4.78324	1.72494e-06	1.62506e-05	2L	kuz
FBgn0031886	346.323	-0.892847	0.186715	-4.78186	1.73679e-06	1.63472e-05	2L	Nuf2
FBgn0039257	13.8172	3.4585	0.723373	4.78108	1.74359e-06	1.63962e-05	3R	tnc
FBgn0033226	1841.17	-0.772697	0.161713	-4.77821	1.76859e-06	1.6616e-05	2R	CG1882
FBgn0052676	985.785	-0.999052	0.209167	-4.77633	1.78526e-06	1.67267e-05	X	stx
FBgn0264571	36.4277	-1.5956	0.334062	-4.77637	1.78487e-06	1.67267e-05	3L	lncRNA:CR43943
FBgn0030451	63.6641	-1.1677	0.244474	-4.77638	1.78479e-06	1.67267e-05	X	CG15717
FBgn0021800	26.5335	-2.20534	0.461939	-4.7741	1.80509e-06	1.68969e-05	2L	Reph
FBgn0031078	1684.49	-1.21141	0.253795	-4.77318	1.81338e-06	1.69591e-05	X	Nup205
FBgn0260990	1097.84	-0.602668	0.126348	-4.76989	1.84327e-06	1.72229e-05	3R	yata
FBgn0033775	13.973	2.57257	0.539472	4.76869	1.85428e-06	1.731e-05	2R	Cyp9h1
FBgn0034654	1849.52	-0.713793	0.149734	-4.76707	1.86928e-06	1.74342e-05	2R	eIF3k
FBgn0037913	1574.94	-0.881766	0.18502	-4.7658	1.88106e-06	1.7528e-05	3R	fabp
FBgn0004363	6959.38	-0.727689	0.152706	-4.76531	1.88564e-06	1.75548e-05	2L	porin
FBgn0030796	1055.18	1.7193	0.360897	4.76395	1.89837e-06	1.76572e-05	X	CG4829
FBgn0002924	1269.97	-1.04913	0.220236	-4.76366	1.90108e-06	1.76665e-05	3R	ncd
FBgn0033134	2702.39	1.12693	0.236888	4.75722	1.96279e-06	1.82234e-05	2R	Tsp42El
FBgn0026179	278.593	0.804506	0.169172	4.75556	1.97897e-06	1.83569e-05	3L	siz
FBgn0265297	75204.5	0.495733	0.104263	4.75465	1.98786e-06	1.84228e-05	2R	pAbp
FBgn0038491	292.87	0.686303	0.144372	4.75371	1.99718e-06	1.84924e-05	3R	CG5292
FBgn0267084	19.4841	-1.88622	0.396805	-4.75351	1.99916e-06	1.84941e-05	X	asRNA:CR45528
FBgn0011704	11399.9	-0.875337	0.184173	-4.7528	2.00622e-06	1.85427e-05	2R	RnrS
FBgn0039735	1589.29	-0.83715	0.176175	-4.75182	2.01596e-06	1.86158e-05	3R	Nph
FBgn0031805	2496.27	0.921166	0.193871	4.75143	2.01985e-06	1.8635e-05	2L	Nepl4
FBgn0265967	12.3126	4.24876	0.894568	4.74951	2.03912e-06	1.87958e-05	X	lncRNA:CR44754
FBgn0013343	2610.73	1.07348	0.22606	4.74867	2.04758e-06	1.88494e-05	3R	Syx1A
FBgn0036191	476.241	-0.675888	0.142335	-4.74857	2.04861e-06	1.88494e-05	3L	Sugb
FBgn0019643	27.8489	2.1343	0.449571	4.74742	2.06027e-06	1.89397e-05	2R	AANAT1
FBgn0000173	2217.4	-0.748583	0.157723	-4.74619	2.07287e-06	1.90385e-05	X	ben
FBgn0030027	11.7887	3.21226	0.676962	4.74511	2.08398e-06	1.91233e-05	X	CG1632
FBgn0024733	48423.7	0.519412	0.109491	4.74388	2.09659e-06	1.92113e-05	3L	RpL10
FBgn0260941	1070.41	1.13381	0.239009	4.74381	2.09731e-06	1.92113e-05	3L	app
FBgn0038381	74.2968	2.12668	0.44846	4.74219	2.11424e-06	1.93491e-05	3R	EndoU
FBgn0039737	2346.66	-0.555191	0.117096	-4.74133	2.1232e-06	1.94137e-05	3R	CG7920
FBgn0003942	32875.7	0.513061	0.108291	4.73779	2.16066e-06	1.97387e-05	2L	RpS27A
FBgn0031739	134.722	-1.14062	0.240803	-4.73676	2.17165e-06	1.98214e-05	2L	CG14005
FBgn0284436	3656.03	-0.433433	0.0915378	-4.73502	2.19037e-06	1.99745e-05	2R	CCT8
FBgn0266598	125.507	-0.880184	0.185966	-4.73302	2.21198e-06	2.01536e-05	3R	Kmn2
FBgn0032876	823.34	-0.468604	0.0990793	-4.72958	2.24984e-06	2.04803e-05	2L	Cen
FBgn0039651	32.7151	2.05133	0.433827	4.72844	2.26253e-06	2.05776e-05	3R	Cyt-c1L
FBgn0031759	1932.39	-0.409184	0.0865524	-4.72759	2.272e-06	2.06454e-05	2L	lid
FBgn0266258	94.3394	-1.58228	0.33471	-4.72731	2.27519e-06	2.06561e-05	3R	lncRNA:CR44953
FBgn0264343	628.363	4.00443	0.847163	4.72688	2.28001e-06	2.06815e-05	2L	CG43799
FBgn0034246	2652.47	-0.44045	0.0932003	-4.72585	2.29156e-06	2.07679e-05	2R	Dcr-2
FBgn0265375	77.7624	2.13301	0.451581	4.72342	2.31906e-06	2.09985e-05	2R	lncRNA:CR44316
FBgn0000024	12.8979	3.4438	0.729428	4.72124	2.34416e-06	2.12044e-05	3R	Ace
FBgn0034072	1460.69	-0.729715	0.154565	-4.72108	2.34593e-06	2.12044e-05	2R	Dg
FBgn0032597	1257.81	-0.612932	0.129862	-4.71986	2.36002e-06	2.1304e-05	2L	CG17904
FBgn0034494	4436.53	1.24751	0.264316	4.71977	2.36111e-06	2.1304e-05	2R	CG10444
FBgn0011787	683.541	-0.574876	0.121836	-4.71845	2.37643e-06	2.14234e-05	3L	mRpL12
FBgn0000524	511.67	-0.547099	0.11599	-4.71678	2.39603e-06	2.15605e-05	X	dx
FBgn0021764	552.607	1.23629	0.262107	4.71675	2.39641e-06	2.15605e-05	X	sdk
FBgn0261445	2220.84	0.634295	0.134481	4.71662	2.39795e-06	2.15605e-05	3L	sgl
FBgn0261244	583.515	1.71465	0.363549	4.71641	2.40048e-06	2.15643e-05	X	inaE
FBgn0034870	29.8985	2.89159	0.613146	4.71598	2.40547e-06	2.15902e-05	2R	CG13559
FBgn0031149	3851.21	-0.655801	0.139152	-4.71282	2.44311e-06	2.19089e-05	X	Stt3A
FBgn0028992	903.409	-0.544334	0.115557	-4.71054	2.47065e-06	2.21365e-05	3R	sds22
FBgn0003701	615.278	-0.644635	0.136857	-4.71028	2.47371e-06	2.21446e-05	2R	thr
FBgn0013684	8729.62	0.989584	0.210123	4.70954	2.48279e-06	2.22064e-05	mitochondrion_genome	ND5
FBgn0266064	2909.61	-0.872874	0.185373	-4.70875	2.49235e-06	2.22726e-05	3R	GlyS
FBgn0039680	931.516	-0.875985	0.18606	-4.70809	2.50051e-06	2.2326e-05	3R	Cap-D2
FBgn0003741	209.087	-0.645829	0.137312	-4.70336	2.55918e-06	2.283e-05	3L	tra
FBgn0033038	869.959	-0.814535	0.17336	-4.69852	2.62059e-06	2.33575e-05	2R	CG7791
FBgn0000636	13.2046	3.48849	0.742737	4.69681	2.6426e-06	2.35331e-05	2L	Fas3
FBgn0036287	56.9404	2.84522	0.605864	4.69613	2.65138e-06	2.35908e-05	3L	CG10663
FBgn0039600	1521.99	-0.86067	0.183389	-4.69315	2.69033e-06	2.38959e-05	3R	CG1646
FBgn0087008	2120.44	-0.649064	0.138297	-4.69327	2.68866e-06	2.38959e-05	X	e(y)3
FBgn0053169	63.8762	-1.25323	0.267059	-4.69271	2.69604e-06	2.39259e-05	3L	CG33169
FBgn0028480	1721.96	0.570442	0.121606	4.69092	2.71984e-06	2.41162e-05	X	CG17841
FBgn0032407	1366.87	-0.406496	0.0868035	-4.68295	2.82776e-06	2.50015e-05	2L	Pex19
FBgn0011020	326.835	-0.793636	0.169477	-4.68286	2.82895e-06	2.50015e-05	3R	Sas-4
FBgn0037849	54.2191	1.88567	0.402665	4.68298	2.8274e-06	2.50015e-05	3R	CG4596
FBgn0033638	1593.97	0.743044	0.158674	4.68283	2.82943e-06	2.50015e-05	2R	CG9005
FBgn0031717	142.267	-1.00367	0.214407	-4.68116	2.8525e-06	2.51836e-05	2L	Oscillin
FBgn0033104	232.925	-0.646965	0.138231	-4.68033	2.8642e-06	2.52651e-05	2R	CG15237
FBgn0036742	11.371	4.86196	1.04017	4.67419	2.95123e-06	2.60104e-05	3L	CG7497
FBgn0086442	1965.84	0.533276	0.114116	4.67309	2.96706e-06	2.61275e-05	2L	mib2
FBgn0038454	204.608	0.720312	0.154309	4.66799	3.04162e-06	2.67406e-05	3R	CG10324
FBgn0038603	22.5373	2.23974	0.479819	4.66789	3.04307e-06	2.67406e-05	3R	PKD
FBgn0003943	2128.62	-0.724036	0.155119	-4.66762	3.04712e-06	2.67406e-05	3L	Ubi-p63E
FBgn0035523	49.4725	-1.51528	0.324628	-4.66775	3.04521e-06	2.67406e-05	3L	Ctl1
FBgn0031948	439.864	0.987541	0.211612	4.66676	3.05994e-06	2.68071e-05	2L	CG7149
FBgn0083984	107.952	-0.948905	0.20333	-4.66682	3.05894e-06	2.68071e-05	3R	CG34148
FBgn0029912	813.622	0.485735	0.104133	4.66454	3.09302e-06	2.70738e-05	X	CG4557
FBgn0283499	4785.55	0.628049	0.134696	4.66273	3.12045e-06	2.72906e-05	3R	InR
FBgn0267199	18.6088	2.42904	0.521023	4.66205	3.13074e-06	2.73573e-05	3R	lncRNA:CR45639
FBgn0039240	993.994	-0.601529	0.129035	-4.66177	3.13503e-06	2.73714e-05	3R	CG3744
FBgn0261514	26.74	2.30487	0.494656	4.65954	3.16916e-06	2.76459e-05	2L	NimA
FBgn0025549	484.423	-0.563586	0.121011	-4.6573	3.20384e-06	2.79246e-05	X	unc-119
FBgn0030116	36.4788	-1.70331	0.365821	-4.65614	3.22194e-06	2.80585e-05	X	CR17438
FBgn0038947	3247.09	-0.459377	0.098689	-4.65479	3.24308e-06	2.82186e-05	3R	Sar1
FBgn0052713	11.3928	3.68827	0.792544	4.65371	3.2601e-06	2.83186e-05	X	CG32713
FBgn0036728	979.807	-0.661277	0.142093	-4.65384	3.25802e-06	2.83186e-05	3L	UQCR-Q
FBgn0052264	718.777	1.1221	0.241196	4.65222	3.28375e-06	2.84999e-05	3L	CG32264
FBgn0024177	1102.48	-0.993178	0.213576	-4.65022	3.31577e-06	2.87535e-05	3L	zpg
FBgn0037936	21.0304	3.39951	0.731208	4.64917	3.3328e-06	2.88768e-05	3R	CG6908
FBgn0030572	314.247	-0.735058	0.158212	-4.64604	3.38371e-06	2.92931e-05	X	mRpS25
FBgn0029818	2754.47	-0.462478	0.0995907	-4.64379	3.42083e-06	2.95894e-05	X	GAA1
FBgn0030993	1225.66	-1.22193	0.263187	-4.64281	3.43699e-06	2.97041e-05	X	Mec2
FBgn0036892	1824.35	-0.619179	0.133384	-4.64206	3.44955e-06	2.97876e-05	3L	Lon
FBgn0039635	1219.93	-0.576983	0.124303	-4.64176	3.45454e-06	2.98056e-05	3R	Pdhb
FBgn0000339	854.411	-0.493722	0.106405	-4.64001	3.48398e-06	3.00091e-05	2L	cni
FBgn0005596	620.644	-0.660821	0.142415	-4.64011	3.48226e-06	3.00091e-05	3R	yem
FBgn0036145	405.587	-1.12104	0.241733	-4.63753	3.52594e-06	3.0345e-05	3L	CG7607
FBgn0261552	3678.8	1.10073	0.237404	4.63652	3.54319e-06	3.04679e-05	3R	ps
FBgn0031549	578.547	-0.596378	0.128682	-4.63453	3.57756e-06	3.07376e-05	2L	Spindly
FBgn0039687	638.481	-1.08855	0.234948	-4.63317	3.60115e-06	3.09144e-05	3R	Naa40
FBgn0028515	1087.68	-0.585032	0.126292	-4.63236	3.61515e-06	3.10086e-05	2L	EndoGI
FBgn0032197	618.955	0.762426	0.164667	4.6301	3.65494e-06	3.13237e-05	2L	CG5694
FBgn0051044	55.9583	-1.62693	0.351478	-4.62881	3.67769e-06	3.14923e-05	3R	lncRNA:CR31044
FBgn0002354	95.1794	-0.880099	0.190168	-4.628	3.69213e-06	3.15896e-05	3R	l(3)87Df
FBgn0036627	15.9674	4.30288	0.929827	4.62762	3.699e-06	3.16219e-05	3L	Gagr
FBgn0037930	1821.87	-0.793144	0.171492	-4.62495	3.74686e-06	3.20045e-05	3R	CG14715
FBgn0003169	692.635	-0.62948	0.136185	-4.62223	3.79638e-06	3.23734e-05	3R	put
FBgn0035708	16.9902	3.86108	0.835307	4.62235	3.79419e-06	3.23734e-05	3L	axed
FBgn0015925	890.092	-0.485423	0.10513	-4.61736	3.88661e-06	3.31154e-05	2R	csul
FBgn0063670	1388.48	0.769872	0.166742	4.61714	3.89059e-06	3.31217e-05	3L	CG40228
FBgn0010762	1405.56	0.608094	0.131742	4.6158	3.91589e-06	3.33094e-05	3L	simj
FBgn0043903	469.284	-0.908873	0.197006	-4.61344	3.96064e-06	3.36621e-05	X	dome
FBgn0003464	2577.75	-0.497371	0.107903	-4.60941	4.03818e-06	3.42928e-05	X	sol
FBgn0000578	1621.22	0.863355	0.187392	4.60722	4.08083e-06	3.46262e-05	2R	ena
FBgn0036762	3113.7	-0.502009	0.108988	-4.6061	4.10284e-06	3.47842e-05	3L	CG7430
FBgn0030605	568.929	-0.589199	0.127991	-4.60344	4.15572e-06	3.52034e-05	X	ND-B18
FBgn0040942	479.327	-0.77543	0.168529	-4.60118	4.20106e-06	3.55581e-05	X	CG12643
FBgn0034735	453.666	-0.753881	0.164004	-4.59671	4.29217e-06	3.62993e-05	2R	CG4610
FBgn0266309	18.119	2.21683	0.482511	4.59437	4.34067e-06	3.66792e-05	2L	lncRNA:CR44974
FBgn0000114	21.2309	2.80598	0.610986	4.59255	4.37868e-06	3.69699e-05	2L	bru1
FBgn0034534	261.88	-0.692545	0.150899	-4.58946	4.44399e-06	3.74904e-05	2R	maf-S
FBgn0011509	1095.38	-0.86193	0.187835	-4.58876	4.45894e-06	3.75857e-05	3L	SrpRbeta
FBgn0032105	581.24	-0.935274	0.203857	-4.58789	4.4775e-06	3.77111e-05	2L	borr
FBgn0020545	1971.72	-0.757596	0.165281	-4.58368	4.56858e-06	3.84466e-05	2L	kraken
FBgn0035425	1255.18	0.629117	0.137259	4.58341	4.57444e-06	3.84643e-05	3L	CG17746
FBgn0043455	508.939	-0.510365	0.111415	-4.58078	4.6325e-06	3.89206e-05	3R	CG5986
FBgn0267398	1223.56	0.72401	0.1581	4.57943	4.66249e-06	3.91405e-05	2R	Yeti
FBgn0033027	237.918	-0.946035	0.206722	-4.57637	4.73114e-06	3.96361e-05	2R	TpnC4
FBgn0033451	431.891	-0.674296	0.147346	-4.57628	4.73313e-06	3.96361e-05	2R	Marc
FBgn0265296	36.0048	3.34873	0.731707	4.5766	4.72589e-06	3.96361e-05	3L	Dscam2
FBgn0030479	346.261	-1.09685	0.239892	-4.57226	4.82485e-06	4.03712e-05	X	Rbp1-like
FBgn0031011	175.432	-1.3265	0.290214	-4.57076	4.85957e-06	4.06285e-05	X	CG8034
FBgn0037485	21.6516	4.79061	1.04856	4.56877	4.90593e-06	4.09827e-05	3R	CG14606
FBgn0051337	71.3793	2.52711	0.553351	4.56693	4.94919e-06	4.13104e-05	3R	CG31337
FBgn0061492	303.988	-0.692917	0.151777	-4.56536	4.98631e-06	4.15864e-05	3L	loj
FBgn0029854	806.268	-0.522166	0.114394	-4.56462	5.004e-06	4.17e-05	X	CG3566
FBgn0037989	569.801	2.37703	0.520771	4.56445	5.00812e-06	4.17005e-05	3R	ATP8B
FBgn0053144	659.305	0.926354	0.203019	4.5629	5.04529e-06	4.19418e-05	2R	CG33144
FBgn0027087	2113.23	-0.507683	0.111262	-4.56293	5.04442e-06	4.19418e-05	X	HisRS
FBgn0083986	227.141	-0.811296	0.177882	-4.56085	5.09458e-06	4.23172e-05	3R	CG34150
FBgn0033052	1676.28	-0.593853	0.130281	-4.55826	5.15801e-06	4.28094e-05	2R	SCAP
FBgn0058263	342.128	0.848589	0.186213	4.5571	5.18646e-06	4.30107e-05	2R	MFS17
FBgn0010497	1449.52	0.924377	0.202882	4.55623	5.20799e-06	4.31195e-05	2L	dmGlut
FBgn0001565	3275.57	-0.540563	0.118642	-4.55624	5.20769e-06	4.31195e-05	X	Hlc
FBgn0037643	3436.63	0.567367	0.124545	4.55551	5.22579e-06	4.32319e-05	3R	ScsbetaA
FBgn0262738	1405.43	1.01383	0.222732	4.55178	5.31929e-06	4.39699e-05	X	norpA
FBgn0036691	416.378	-0.591143	0.129906	-4.55053	5.35104e-06	4.41967e-05	3L	beg
FBgn0029728	20.3807	-2.52413	0.554739	-4.55013	5.36136e-06	4.42107e-05	X	CG2861
FBgn0037249	14340.1	-0.631754	0.138842	-4.55016	5.36064e-06	4.42107e-05	3R	eIF3a
FBgn0266758	2822.18	1.42012	0.312275	4.54767	5.42436e-06	4.46943e-05	3R	Esyt2
FBgn0023170	15940.9	0.671187	0.147645	4.54596	5.4686e-06	4.49943e-05	2R	RpL39
FBgn0030574	30.5843	2.57557	0.566568	4.54592	5.46955e-06	4.49943e-05	X	sbm
FBgn0033724	502.332	1.74295	0.383679	4.54273	5.553e-06	4.56441e-05	2R	CG8501
FBgn0040512	777.608	-0.566469	0.124709	-4.54231	5.56403e-06	4.56982e-05	3L	zetaCOP
FBgn0011655	685.6	-0.649309	0.14301	-4.54031	5.61713e-06	4.60974e-05	3R	Med
FBgn0037687	350.551	-0.73736	0.162475	-4.53829	5.6712e-06	4.64667e-05	3R	CG8132
FBgn0035208	31.9649	1.82543	0.402214	4.53844	5.66711e-06	4.64667e-05	3L	CG9184
FBgn0036689	304.699	-0.728534	0.160801	-4.53066	5.88004e-06	4.81009e-05	3L	CG7730
FBgn0263199	770.072	0.750221	0.165587	4.53067	5.87963e-06	4.81009e-05	3L	Galk
FBgn0031143	588.539	-0.770487	0.170102	-4.52955	5.91094e-06	4.83151e-05	X	CG1532
FBgn0034184	1511.08	0.658389	0.145461	4.52621	6.00506e-06	4.90453e-05	2R	CG9646
FBgn0266209	11.1616	3.18066	0.702842	4.52542	6.02744e-06	4.91889e-05	2L	lncRNA:CR44904
FBgn0003892	198.74	-2.01808	0.446192	-4.5229	6.09985e-06	4.97402e-05	2R	ptc
FBgn0037487	11.5217	4.04708	0.894962	4.52207	6.12391e-06	4.98967e-05	3R	thw
FBgn0267002	477.027	-0.693407	0.1534	-4.52024	6.17691e-06	5.02886e-05	2R	unc-104
FBgn0051821	137.66	3.67204	0.812627	4.51873	6.22115e-06	5.06085e-05	2L	CG31821
FBgn0263111	225.368	-1.01374	0.224404	-4.51748	6.25791e-06	5.08673e-05	X	cac
FBgn0262714	771.931	-0.510852	0.11309	-4.51723	6.26533e-06	5.08872e-05	3L	Sap130
FBgn0085227	7.72609	6.68757	1.48105	4.51541	6.31945e-06	5.12861e-05	2R	CG34198
FBgn0264386	39.2708	2.88557	0.639231	4.51413	6.3577e-06	5.15558e-05	X	Ca-alpha1T
FBgn0024754	2247.57	-0.793081	0.175707	-4.51367	6.37165e-06	5.1628e-05	2R	Flo1
FBgn0086356	1810.05	-0.945299	0.209586	-4.51032	6.47295e-06	5.24073e-05	2R	tum
FBgn0004396	1416.2	0.846382	0.187726	4.50861	6.52539e-06	5.27487e-05	3L	CrebA
FBgn0036152	353.771	1.0713	0.237611	4.50865	6.52423e-06	5.27487e-05	3L	CG6175
FBgn0035697	91.2318	-2.35677	0.523354	-4.50321	6.69343e-06	5.40643e-05	3L	CG10163
FBgn0014391	1302.09	-0.679855	0.15102	-4.50176	6.73918e-06	5.43911e-05	X	sun
FBgn0034432	1084.76	-0.604961	0.134391	-4.50149	6.74783e-06	5.4418e-05	2R	CG7461
FBgn0032421	210.799	-0.965231	0.214435	-4.50127	6.7548e-06	5.44313e-05	2L	crok
FBgn0015321	771.238	-0.639122	0.142078	-4.49838	6.84728e-06	5.51332e-05	3L	Ubc4
FBgn0044020	203.962	-0.882214	0.196295	-4.49433	6.9789e-06	5.61489e-05	2R	Roc2
FBgn0263606	124.896	-1.01317	0.225548	-4.49205	7.05413e-06	5.67097e-05	3L	Hsc20
FBgn0032923	1578.97	-0.678623	0.151085	-4.49166	7.0671e-06	5.67694e-05	2L	CG9248
FBgn0027575	96.0462	-1.09349	0.243461	-4.49142	7.0751e-06	5.67892e-05	3R	GABA-B-R2
FBgn0029977	299.467	-0.75739	0.16865	-4.4909	7.09219e-06	5.68818e-05	X	hdm
FBgn0033426	521.326	-0.549528	0.12245	-4.48778	7.19687e-06	5.76762e-05	2R	CG1814
FBgn0029824	399.619	1.12627	0.250978	4.48753	7.20524e-06	5.76982e-05	X	CG3726
FBgn0261258	5947.51	1.36405	0.304127	4.48514	7.2867e-06	5.82758e-05	3L	rgn
FBgn0261625	3964.58	0.631082	0.140707	4.48508	7.28874e-06	5.82758e-05	2R	GLS
FBgn0030006	92.4615	-1.0436	0.232827	-4.48231	7.38406e-06	5.8946e-05	X	CG17982
FBgn0036483	470.332	0.656305	0.146419	4.48237	7.38181e-06	5.8946e-05	3L	CG12316
FBgn0003053	29.0785	1.98134	0.442478	4.47782	7.54075e-06	6.01499e-05	X	peb
FBgn0032191	953.697	0.837378	0.187033	4.47717	7.56405e-06	6.02889e-05	2L	CG5734
FBgn0040344	808.399	0.923001	0.206197	4.4763	7.59462e-06	6.04855e-05	X	Lztr1
FBgn0034491	1589.42	0.60176	0.13451	4.47371	7.68742e-06	6.1177e-05	2R	Hsl
FBgn0020389	184.55	-0.811141	0.18155	-4.46786	7.90046e-06	6.28237e-05	3L	Papss
FBgn0263766	130.448	1.25502	0.280959	4.46691	7.93581e-06	6.30558e-05	2L	asRNA:CR43683
FBgn0029152	1299.88	0.62776	0.140693	4.4619	8.12357e-06	6.44977e-05	3L	Mkrn1
FBgn0052069	89.0127	-1.13847	0.255176	-4.46149	8.13909e-06	6.4571e-05	3L	CG32069
FBgn0038463	388.056	-0.707881	0.158751	-4.45905	8.23223e-06	6.52594e-05	3R	CG3534
FBgn0032956	5449.93	0.977907	0.219369	4.45782	8.27984e-06	6.55861e-05	2L	Cul2
FBgn0037788	32.7502	3.08282	0.691798	4.45625	8.34068e-06	6.6017e-05	3R	CAH7
FBgn0262142	12.296	4.00214	0.898394	4.45477	8.39814e-06	6.63693e-05	2R	lncRNA:CR42868
FBgn0264539	59.3422	1.2152	0.27278	4.45485	8.39519e-06	6.63693e-05	2R	lncRNA:CR43918
FBgn0283508	114.571	2.23606	0.502276	4.45186	8.51297e-06	6.72249e-05	2R	nw
FBgn0033266	274.594	-0.649372	0.145981	-4.44833	8.6541e-06	6.82868e-05	2R	Socs44A
FBgn0034009	718.378	0.573856	0.129063	4.44632	8.73528e-06	6.88743e-05	2R	CG8155
FBgn0015625	401.198	-1.03981	0.233928	-4.44499	8.78943e-06	6.92111e-05	3R	CycB3
FBgn0250907	335.76	1.56811	0.352799	4.44478	8.79825e-06	6.92111e-05	2L	Cht10
FBgn0030683	228.096	0.634403	0.142726	4.44489	8.79354e-06	6.92111e-05	X	Mvd
FBgn0037007	3950.11	-0.741659	0.166878	-4.44433	8.81662e-06	6.93024e-05	3L	CG5059
FBgn0040237	2639.56	-0.880861	0.198233	-4.44357	8.84782e-06	6.94944e-05	3R	bor
FBgn0039328	672.8	-0.970237	0.218373	-4.44302	8.87051e-06	6.96078e-05	3R	CHKov2
FBgn0003612	1195.85	-0.46447	0.104542	-4.44289	8.87584e-06	6.96078e-05	2R	Su(var)2-10
FBgn0005672	4800.15	-0.734829	0.165448	-4.44144	8.93584e-06	7.00247e-05	2L	spi
FBgn0262730	863	-0.733989	0.16555	-4.43363	9.26598e-06	7.25564e-05	X	dtn
FBgn0030263	6300.35	-0.887698	0.200254	-4.43286	9.29894e-06	7.27589e-05	X	CG2076
FBgn0004374	442.1	-0.660356	0.148986	-4.43233	9.32183e-06	7.28824e-05	2L	neb
FBgn0041712	80.2892	1.00138	0.226062	4.42966	9.43818e-06	7.37358e-05	2R	yellow-d
FBgn0013759	1068.19	-0.536604	0.121185	-4.42796	9.5128e-06	7.42622e-05	3R	CASK
FBgn0058045	2902.13	0.576782	0.130276	4.42738	9.53828e-06	7.44044e-05	3L	CG40045
FBgn0005533	14894.7	0.607956	0.137345	4.4265	9.5774e-06	7.46527e-05	3L	RpS17
FBgn0003165	1787.54	0.875933	0.198058	4.42262	9.75126e-06	7.59502e-05	3R	pum
FBgn0027568	1336.88	0.552268	0.124989	4.41855	9.93674e-06	7.73253e-05	2L	Cand1
FBgn0017572	2150.04	0.571336	0.129308	4.41841	9.9429e-06	7.73253e-05	3L	Mo25
FBgn0047135	2812.17	-0.84785	0.1919	-4.41818	9.95367e-06	7.73504e-05	3L	CG32276
FBgn0001075	52.8198	-1.36781	0.309623	-4.41767	9.97705e-06	7.74733e-05	2L	ft
FBgn0035760	58.2275	1.16688	0.264272	4.41545	1.00801e-05	7.82143e-05	3L	CG8607
FBgn0087021	210.441	-1.11312	0.252151	-4.41449	1.01249e-05	7.85025e-05	3R	Spc25
FBgn0034997	1677.65	1.03082	0.233698	4.4109	1.02944e-05	7.97562e-05	2R	CG3376
FBgn0262167	1154.97	-0.588957	0.13363	-4.40736	1.04637e-05	8.10071e-05	3R	ana1
FBgn0020655	914.317	-0.498109	0.113034	-4.4067	1.04955e-05	8.11917e-05	3L	ArfGAP1
FBgn0285913	491.969	-0.696387	0.158057	-4.40593	1.0533e-05	8.14199e-05	3R	red
FBgn0027356	415.199	0.92309	0.20973	4.40132	1.07593e-05	8.3044e-05	2R	Amph
FBgn0035228	1270.26	-0.455006	0.103379	-4.40132	1.07592e-05	8.3044e-05	3L	CG12091
FBgn0039044	3635.59	1.6042	0.364496	4.40114	1.07684e-05	8.3052e-05	3R	p53
FBgn0038787	1719.52	-0.456838	0.103881	-4.39771	1.094e-05	8.43117e-05	3R	CG4360
FBgn0034436	601.623	-0.733738	0.166874	-4.39696	1.09778e-05	8.45394e-05	2R	CG11961
FBgn0053182	181.196	-1.03593	0.235677	-4.39554	1.10497e-05	8.5e-05	2R	Kdm4B
FBgn0259978	1694.86	0.58861	0.133913	4.39545	1.10541e-05	8.5e-05	2R	vlc
FBgn0031816	188.419	0.942588	0.214515	4.39404	1.11265e-05	8.54922e-05	2L	Rchy1
FBgn0034098	1542.39	-0.576915	0.131306	-4.39366	1.11457e-05	8.55113e-05	2R	krimp
FBgn0263133	500.657	-0.546434	0.124365	-4.3938	1.11388e-05	8.55113e-05	2L	mEFG1
FBgn0010412	28624.9	0.468176	0.106576	4.39287	1.11862e-05	8.57582e-05	X	RpS19a
FBgn0042134	5048.97	-0.461872	0.105156	-4.39225	1.12183e-05	8.5876e-05	3L	Capr
FBgn0010825	1191.18	-0.645411	0.146938	-4.3924	1.12104e-05	8.5876e-05	3L	Gug
FBgn0011768	2112.44	-0.786013	0.178991	-4.39135	1.12649e-05	8.61677e-05	3R	Fdh
FBgn0270926	712.781	-0.710221	0.161844	-4.3883	1.14239e-05	8.73193e-05	3L	AsnS
FBgn0031068	1141.32	-0.940329	0.214365	-4.38659	1.15144e-05	8.79451e-05	X	Alr
FBgn0263911	872.239	-0.815526	0.186044	-4.38352	1.16779e-05	8.91275e-05	3L	COX8
FBgn0261016	191.297	1.07991	0.246626	4.37875	1.1936e-05	9.10296e-05	2R	clos
FBgn0044323	1058.2	-0.425513	0.0971993	-4.37774	1.19918e-05	9.13873e-05	2L	Cka
FBgn0034405	1800.01	-1.18756	0.271354	-4.37642	1.20646e-05	9.18737e-05	2R	Jheh2
FBgn0051158	1920.23	0.99371	0.227109	4.37548	1.21165e-05	9.22007e-05	3R	Efa6
FBgn0267001	19.0528	2.51539	0.575016	4.37447	1.21729e-05	9.24921e-05	X	Ten-a
FBgn0040837	2102.02	1.4743	0.337014	4.3746	1.21653e-05	9.24921e-05	3L	CG8620
FBgn0030974	1085.66	-0.440868	0.100816	-4.37301	1.22543e-05	9.30416e-05	X	Flacc
FBgn0037240	1119.84	-0.839697	0.192054	-4.37218	1.23011e-05	9.33279e-05	3R	Cont
FBgn0041205	928.145	0.454907	0.104056	4.37176	1.23251e-05	9.34413e-05	2R	key
FBgn0024986	424.199	-0.759828	0.173838	-4.37089	1.23741e-05	9.37431e-05	X	CG3719
FBgn0022935	256.734	-0.851069	0.194769	-4.36963	1.24456e-05	9.42154e-05	3L	D19A
FBgn0260749	758.005	-0.748759	0.171366	-4.36935	1.24615e-05	9.42659e-05	2L	Utx
FBgn0261014	12155.1	0.489425	0.112046	4.36809	1.25338e-05	9.47429e-05	2R	NA
FBgn0035916	189.424	-0.653854	0.149896	-4.36204	1.28857e-05	9.7331e-05	3L	GAPsec
FBgn0051450	249.726	-1.10335	0.253033	-4.3605	1.29766e-05	9.79454e-05	3R	mRpS18A
FBgn0036008	370.889	0.578131	0.132603	4.35987	1.30142e-05	9.8157e-05	3L	CG3408
FBgn0033912	40007.4	0.471701	0.108208	4.35919	1.30546e-05	9.83898e-05	2R	RpS23
FBgn0262902	137.05	0.809943	0.185895	4.357	1.31858e-05	9.93056e-05	2R	asRNA:CR43257
FBgn0086674	245.734	0.698236	0.160296	4.35591	1.32517e-05	9.97286e-05	X	Tpst
FBgn0002732	53.8815	1.22558	0.281384	4.35554	1.3274e-05	9.98229e-05	3R	E(spl)malpha-BFM
FBgn0025469	240.064	0.670128	0.153903	4.35422	1.33541e-05	0.000100351	2R	slv
FBgn0039757	37190.2	0.427223	0.0981538	4.35259	1.34539e-05	0.000101027	3R	RpS7
FBgn0052850	224.285	0.802752	0.184606	4.34847	1.37093e-05	0.00010287	4	CG32850
FBgn0031939	21.5948	2.94455	0.6772	4.34812	1.37309e-05	0.000102957	2L	CG13796
FBgn0030610	477.428	-0.636387	0.146383	-4.3474	1.3776e-05	0.000103219	X	CG9065
FBgn0030757	238.063	-0.63764	0.14673	-4.34567	1.38852e-05	0.000103961	X	CG9902
FBgn0261808	691.981	-1.23237	0.283652	-4.34467	1.39487e-05	0.000104361	3R	cu
FBgn0003141	408.147	-0.4832	0.11125	-4.34336	1.40321e-05	0.000104908	2L	pr
FBgn0034010	17.6782	3.84346	0.88505	4.34265	1.40775e-05	0.000105094	2R	CG8157
FBgn0035952	17.4365	3.02212	0.695893	4.34279	1.40685e-05	0.000105094	3L	CG5280
FBgn0261872	806.324	-0.585325	0.134818	-4.3416	1.41446e-05	0.000105518	3L	scaf6
FBgn0024362	772.608	-0.531524	0.122445	-4.34092	1.4189e-05	0.000105773	X	Naa30A
FBgn0039759	9.41633	4.2491	0.978979	4.34034	1.42261e-05	0.000105972	3R	CG9733
FBgn0037057	176.829	-1.41141	0.325234	-4.33969	1.42683e-05	0.000106209	3L	CG10512
FBgn0086656	1752.74	-0.558254	0.128653	-4.33923	1.42981e-05	0.000106354	2R	shrb
FBgn0040064	502.772	-0.565406	0.130308	-4.339	1.43131e-05	0.000106388	2L	yip2
FBgn0028402	296.275	-0.661356	0.152454	-4.33808	1.43733e-05	0.000106758	3L	Sin
FBgn0014163	21542	-0.902945	0.208344	-4.33392	1.46476e-05	0.000108717	3L	fax
FBgn0264953	2667.77	1.34745	0.310955	4.33325	1.46922e-05	0.000108969	2L	Piezo
FBgn0015240	467.653	0.477926	0.110329	4.33182	1.47885e-05	0.000109604	3R	Hr96
FBgn0031452	275.904	-0.649337	0.149933	-4.33084	1.48539e-05	0.000110009	2L	Cwc25
FBgn0085732	224.449	-0.810151	0.187122	-4.32953	1.49428e-05	0.000110588	2R	CR40190
FBgn0037717	4821.27	0.880601	0.203416	4.32907	1.49739e-05	0.000110658	3R	CG8301
FBgn0031474	1109.19	0.912798	0.210853	4.32908	1.49734e-05	0.000110658	2L	CG2991
FBgn0003321	1739.38	0.865243	0.199947	4.32736	1.50907e-05	0.000111441	X	sbr
FBgn0037260	20.7879	2.7366	0.632607	4.32592	1.51898e-05	0.000111791	3R	Mur82C
FBgn0032123	73.7803	1.09668	0.253525	4.32571	1.52043e-05	0.000111791	2L	Oatp30B
FBgn0023167	914.947	-0.642249	0.148462	-4.32602	1.51827e-05	0.000111791	2R	SmD3
FBgn0263446	107.214	-0.873619	0.201967	-4.32556	1.52145e-05	0.000111791	2R	asRNA:CR43469
FBgn0266521	1902.97	1.40808	0.325498	4.32593	1.51886e-05	0.000111791	2L	stai
FBgn0052313	200.519	-0.881007	0.203663	-4.3258	1.51981e-05	0.000111791	3L	CG32313
FBgn0030854	1436.32	-0.455834	0.105372	-4.32596	1.51866e-05	0.000111791	X	CG8289
FBgn0020653	10157.6	-0.83235	0.192536	-4.32309	1.53862e-05	0.000112972	X	Trxr-1
FBgn0015391	2507.89	-0.712292	0.164802	-4.3221	1.54554e-05	0.000113359	2L	glu
FBgn0266083	962.926	-0.729635	0.168818	-4.32202	1.5461e-05	0.000113359	2R	ocm
FBgn0037608	290.885	-0.660216	0.152774	-4.32153	1.54954e-05	0.00011353	3R	mRpL19
FBgn0027086	3000.28	-0.715774	0.165642	-4.3212	1.5518e-05	0.000113614	3L	IleRS
FBgn0002638	3360.94	-0.714299	0.165494	-4.31616	1.58769e-05	0.000116159	3L	Rcc1
FBgn0260722	167.443	-0.919007	0.213031	-4.31396	1.60358e-05	0.000117238	3R	lncRNA:CR42549
FBgn0032202	567.829	-0.520886	0.12075	-4.31375	1.60511e-05	0.000117265	2L	REPTOR-BP
FBgn0261931	875.94	0.696253	0.161453	4.31243	1.61468e-05	0.000117881	X	CG42797
FBgn0039955	2580.34	0.992421	0.230181	4.31149	1.62161e-05	0.000118302	3R	CG41099
FBgn0034362	445.054	-0.647349	0.150172	-4.31073	1.62718e-05	0.000118625	2R	CG5323
FBgn0045035	2995.13	-0.455488	0.105685	-4.30989	1.63339e-05	0.000118993	3R	tefu
FBgn0037001	3181.8	-0.462086	0.107228	-4.30937	1.63718e-05	0.000119184	3L	ND-39
FBgn0005674	2585.43	-0.564172	0.130949	-4.30832	1.64497e-05	0.000119615	3R	GluProRS
FBgn0030766	287.19	1.14869	0.266624	4.30826	1.64543e-05	0.000119615	X	mthl1
FBgn0035833	514.031	-0.686368	0.159344	-4.30745	1.65147e-05	0.000119969	3L	CG7565
FBgn0037915	210.562	-1.50143	0.348592	-4.30713	1.65389e-05	0.000120059	3R	CG6790
FBgn0260487	11.1742	2.65014	0.615509	4.30561	1.66529e-05	0.000120802	3R	CG42534
FBgn0053494	1937.92	0.903934	0.209984	4.30478	1.67154e-05	0.000121169	3R	CG33494
FBgn0029942	732.944	-0.785611	0.182522	-4.3042	1.67592e-05	0.000121401	X	CG2059
FBgn0267679	25.8537	1.81949	0.422768	4.30375	1.6793e-05	0.000121491	3R	lncRNA:CR46015
FBgn0042178	196.125	-0.687535	0.159754	-4.30372	1.67954e-05	0.000121491	3L	Apl
FBgn0040918	2887.3	0.651483	0.151387	4.30342	1.68185e-05	0.000121572	X	schlank
FBgn0038704	840.317	-0.435933	0.101317	-4.30267	1.68749e-05	0.000121878	3R	CG5316
FBgn0034035	349.035	-0.5739	0.133386	-4.30255	1.68846e-05	0.000121878	2R	CG8207
FBgn0033989	431.518	-0.86839	0.201892	-4.30126	1.69831e-05	0.000122503	2R	CG7639
FBgn0037504	467.553	-0.938602	0.218336	-4.2989	1.7165e-05	0.000123728	3R	CG1142
FBgn0003268	1281.67	-0.700101	0.162875	-4.29839	1.72044e-05	0.000123925	3R	rod
FBgn0035355	126.811	-1.23871	0.288304	-4.29653	1.73494e-05	0.000124882	3L	CG16985
FBgn0039958	1040.62	0.824981	0.192096	4.29462	1.7499e-05	0.00012587	2L	CG12567
FBgn0035703	155.979	0.710915	0.16567	4.29116	1.77745e-05	0.000127762	3L	CG8270
FBgn0023515	351.006	-0.706541	0.164671	-4.29062	1.78176e-05	0.000127982	X	CG14814
FBgn0037094	1140.77	-0.455603	0.106208	-4.28972	1.78895e-05	0.000128409	3L	CG7611
FBgn0086691	295.482	-0.936084	0.218422	-4.28567	1.82193e-05	0.000130684	2L	UK114
FBgn0000299	9883.78	2.63085	0.613939	4.2852	1.82577e-05	0.000130868	2L	Col4a1
FBgn0023180	384.264	-0.657454	0.153462	-4.28414	1.83449e-05	0.000131402	2R	Orc6
FBgn0050055	356.486	1.11023	0.259174	4.28374	1.83777e-05	0.000131492	2R	lncRNA:CR30055
FBgn0036777	156.625	1.32689	0.309755	4.28367	1.83832e-05	0.000131492	3L	CG7341
FBgn0032720	166.138	-0.752406	0.175679	-4.28283	1.84527e-05	0.000131897	2L	mRpL13
FBgn0011259	150.762	1.0703	0.249951	4.28204	1.85191e-05	0.00013228	2L	Sema1a
FBgn0030528	62.5976	-1.08112	0.252523	-4.28128	1.85825e-05	0.000132617	X	CG11095
FBgn0052533	433.504	-0.540991	0.126366	-4.28116	1.85923e-05	0.000132617	X	CG32533
FBgn0284220	5550.33	-0.786871	0.183807	-4.28096	1.86088e-05	0.000132642	2L	Top2
FBgn0015513	3196.36	0.879154	0.205506	4.278	1.88576e-05	0.000134323	3R	mbc
FBgn0261790	925.956	-0.763877	0.1786	-4.27703	1.89405e-05	0.000134819	2L	SmE
FBgn0020372	902.063	1.0583	0.247611	4.27403	1.91975e-05	0.000136554	2R	TM4SF
FBgn0039532	831.603	-0.74022	0.173217	-4.27337	1.92539e-05	0.00013686	3R	Mtl
FBgn0025832	657.044	-0.523542	0.12253	-4.27278	1.93053e-05	0.000137131	2R	Fen1
FBgn0033978	821.765	-1.22687	0.28732	-4.27005	1.95429e-05	0.000138722	2R	Cyp6a23
FBgn0037347	504.574	-0.690161	0.161645	-4.26962	1.95808e-05	0.000138895	3R	CG1427
FBgn0250848	3567.94	-0.895758	0.209826	-4.26905	1.96305e-05	0.000139151	3L	26-29-p
FBgn0264542	174.645	1.75538	0.411215	4.26876	1.9656e-05	0.000139236	X	hwt
FBgn0031053	335.32	-0.959596	0.224821	-4.26826	1.97003e-05	0.000139453	X	CG14223
FBgn0032881	416.068	-0.808785	0.189508	-4.26782	1.97394e-05	0.000139633	2L	Amacr
FBgn0264494	33.9749	2.58839	0.606625	4.26687	1.98239e-05	0.000140038	2L	CG17646
FBgn0036479	232.827	3.44642	0.807711	4.2669	1.9821e-05	0.000140038	3L	CG13458
FBgn0036448	1997.7	-0.435058	0.101966	-4.26669	1.98396e-05	0.000140052	3L	mop
FBgn0036732	619.22	1.32766	0.311193	4.26636	1.98685e-05	0.00014016	3L	Oatp74D
FBgn0023097	989.616	-0.47873	0.11222	-4.26599	1.99016e-05	0.000140297	3R	bon
FBgn0034645	366.326	-0.676025	0.158622	-4.26187	2.02726e-05	0.000142814	2R	ND-B12
FBgn0035997	461.387	-0.569455	0.133788	-4.25639	2.0775e-05	0.000146253	3L	phol
FBgn0034568	83.495	-1.0013	0.235261	-4.25613	2.07997e-05	0.000146326	2R	CG3216
FBgn0046696	85.1528	-1.01323	0.238126	-4.25503	2.09018e-05	0.000146843	3R	RNaseP:RNA
FBgn0035727	153.38	0.871952	0.204915	4.25519	2.08875e-05	0.000146843	3L	CG10063
FBgn0039430	102.328	1.40106	0.329522	4.2518	2.12064e-05	0.00014888	3R	CG5455
FBgn0010198	10031.4	0.448773	0.105555	4.25157	2.12276e-05	0.000148927	X	RpS15Aa
FBgn0027572	1096.27	0.502316	0.118184	4.25029	2.13493e-05	0.000149679	2R	CG5009
FBgn0002781	2066.72	-0.656296	0.154422	-4.25	2.13769e-05	0.00014977	3R	mod(mdg4)
FBgn0267796	132.673	2.19105	0.515579	4.24968	2.14075e-05	0.000149882	3L	Tmc
FBgn0030136	27352.7	0.493765	0.116213	4.24881	2.14911e-05	0.000150364	X	RpS28b
FBgn0032026	4254.95	0.946832	0.222869	4.24838	2.15324e-05	0.00015055	2L	CG7627
FBgn0034925	365.608	0.608935	0.143476	4.24415	2.19424e-05	0.000153313	2R	CG5339
FBgn0003139	1087.7	0.415967	0.0980838	4.24093	2.22592e-05	0.00015542	X	PpV
FBgn0037670	285.759	-0.678138	0.159984	-4.2388	2.2472e-05	0.000156799	3R	Ibf1
FBgn0030745	1174.84	-0.831378	0.19616	-4.23826	2.25257e-05	0.000157067	X	CG4239
FBgn0030048	1152.37	0.808334	0.190808	4.23638	2.27155e-05	0.000158283	X	CG12112
FBgn0036496	8.8713	3.5279	0.832967	4.23535	2.28201e-05	0.000158903	3L	CG7804
FBgn0000618	191.167	-0.809495	0.191151	-4.23484	2.28713e-05	0.000159152	X	e(y)2
FBgn0000382	334.206	-0.612537	0.144746	-4.23181	2.31819e-05	0.000161204	X	csw
FBgn0029766	50237.1	1.11209	0.262835	4.23114	2.32513e-05	0.000161577	X	CG15784
FBgn0260959	1172.49	-0.523074	0.12363	-4.23097	2.32686e-05	0.000161588	2R	MCPH1
FBgn0054054	10.0219	6.1795	1.4606	4.23081	2.3285e-05	0.000161592	2R	CG34054
FBgn0267429	55.6339	1.47095	0.347822	4.22904	2.3469e-05	0.000162759	3L	CG45782
FBgn0024957	1593.47	-0.612493	0.144859	-4.22819	2.35574e-05	0.000163261	3R	Irp-1B
FBgn0036834	26.1846	4.04055	0.955723	4.22774	2.36053e-05	0.000163482	3L	CG6836
FBgn0264984	112.37	2.04048	0.482748	4.2268	2.37037e-05	0.000164053	3R	lncRNA:CR44135
FBgn0266101	356.274	-1.0996	0.260345	-4.22363	2.40397e-05	0.000166267	3L	CG44838
FBgn0002931	5.4897	5.65668	1.33951	4.22296	2.41119e-05	0.000166455	2L	net
FBgn0011672	20314.4	0.82848	0.196175	4.22317	2.40892e-05	0.000166455	3R	Mvl
FBgn0263863	719.625	-0.460628	0.109082	-4.22277	2.41319e-05	0.000166455	3R	mRpL45
FBgn0004390	1878.62	-0.479181	0.113472	-4.22289	2.41186e-05	0.000166455	3L	RasGAP1
FBgn0284248	3663.64	-0.765274	0.181242	-4.22239	2.4173e-05	0.000166626	2L	Cyt-c-p
FBgn0265174	349.986	-0.733465	0.173816	-4.21977	2.44547e-05	0.000168455	2R	PIG-V
FBgn0021856	550.106	-0.486378	0.115352	-4.21648	2.48149e-05	0.000170821	2L	l(2)k14505
FBgn0038324	200.288	0.730274	0.173222	4.21583	2.48866e-05	0.0001712	3R	CG5038
FBgn0033352	1491.19	-0.5909	0.14025	-4.21319	2.5179e-05	0.000173095	2R	PAN2
FBgn0002932	368.092	1.03954	0.246793	4.21221	2.52889e-05	0.000173734	3R	neur
FBgn0053170	666.862	-0.794543	0.188698	-4.21066	2.5462e-05	0.000174689	3L	CG33170
FBgn0031299	15.0308	2.60372	0.618348	4.21076	2.54509e-05	0.000174689	2L	CG4629
FBgn0038363	129.339	-0.898303	0.213451	-4.20847	2.57105e-05	0.000176276	3R	Acyp2
FBgn0030685	2571.78	0.480859	0.114295	4.20715	2.58607e-05	0.000177187	X	Graf
FBgn0011710	2703.07	0.439447	0.104525	4.20422	2.61985e-05	0.000179382	X	2001-09-01
FBgn0035918	179.911	-0.723562	0.172115	-4.20394	2.62311e-05	0.000179485	3L	Cdc6
FBgn0036857	290.747	1.07159	0.254946	4.20321	2.6316e-05	0.000179946	3L	Aldh7A1
FBgn0263355	390.478	-1.01555	0.241653	-4.20252	2.6396e-05	0.000180372	2L	CG31688
FBgn0263977	4994.9	0.710396	0.169093	4.20121	2.65493e-05	0.000181299	3R	Tim17b
FBgn0023091	18.7754	3.26158	0.77655	4.20009	2.66811e-05	0.000181868	2L	dimm
FBgn0039504	29.7646	-1.32737	0.316047	-4.1999	2.6703e-05	0.000181868	3R	CG14260
FBgn0051712	670.901	-0.513176	0.122175	-4.20034	2.6652e-05	0.000181868	2L	CG31712
FBgn0261436	1316.6	-0.447102	0.106455	-4.1999	2.67036e-05	0.000181868	3R	DhpD
FBgn0011705	533.21	0.870925	0.20745	4.19823	2.69005e-05	0.000183088	2L	rost
FBgn0053100	1508.38	0.878771	0.209437	4.19586	2.71836e-05	0.000184892	3R	eIF4EHP
FBgn0039254	467.511	-0.757463	0.180616	-4.19377	2.74358e-05	0.000186483	3R	Nmnat
FBgn0030893	1954.86	-0.889466	0.212178	-4.19208	2.76404e-05	0.00018775	X	RhoGAP16F
FBgn0004401	3903.19	-0.53282	0.12716	-4.19016	2.78752e-05	0.000189219	3L	Pep
FBgn0085384	1228.79	-1.28241	0.306097	-4.18956	2.79497e-05	0.000189599	3R	CG34355
FBgn0033235	1088.61	-0.647191	0.154518	-4.18845	2.80869e-05	0.000190404	2R	CG8728
FBgn0053145	871.566	0.566698	0.135345	4.18707	2.82582e-05	0.000191438	2R	GalT1
FBgn0035227	2229.71	-0.356188	0.0850955	-4.18574	2.84243e-05	0.000192436	3L	Iml1
FBgn0004655	1362.99	-0.620288	0.148241	-4.18431	2.8603e-05	0.000193416	X	wapl
FBgn0000547	197.943	-0.942074	0.225146	-4.18428	2.86067e-05	0.000193416	2L	ed
FBgn0000394	405.944	-0.823188	0.196948	-4.17972	2.91863e-05	0.000197204	X	cv
FBgn0028369	200.546	1.11499	0.266845	4.17842	2.93538e-05	0.000198206	X	kirre
FBgn0000146	1675.08	-0.541725	0.129807	-4.17332	3.00195e-05	0.000202453	2L	aub
FBgn0013683	35.3273	1.38415	0.331667	4.1733	3.00224e-05	0.000202453	mitochondrion_genome	ND4L
FBgn0003175	506.691	-0.405816	0.0972616	-4.17241	3.01394e-05	0.000203109	2R	px
FBgn0020626	1403.85	-0.5007	0.120041	-4.17109	3.03146e-05	0.000204155	3R	Osbp
FBgn0036621	1189.14	0.521221	0.125004	4.16964	3.05086e-05	0.000205327	3L	roq
FBgn0030478	638.074	-0.708346	0.16992	-4.1687	3.06346e-05	0.00020604	X	CG1640
FBgn0039403	143.09	-0.928558	0.222957	-4.16475	3.11694e-05	0.0002095	3R	Sld5
FBgn0035923	655.333	-0.559194	0.134341	-4.16251	3.14774e-05	0.000211431	3L	CG6511
FBgn0053056	198.568	-1.17008	0.281191	-4.16114	3.16661e-05	0.000212559	3L	CG33056
FBgn0265274	19.8878	3.47611	0.835478	4.16063	3.17377e-05	0.0002129	3R	Inx3
FBgn0033153	945.143	1.56824	0.376944	4.1604	3.17684e-05	0.000212967	2R	Gadd45
FBgn0033240	118.45	-0.833665	0.200419	-4.15961	3.18794e-05	0.000213571	2R	CG2906
FBgn0262081	3639.75	0.592533	0.142472	4.15895	3.19717e-05	0.000214049	3R	Csk
FBgn0025109	502.357	0.487762	0.117316	4.15767	3.21509e-05	0.000215109	2L	Bem46
FBgn0030884	92.6604	1.95241	0.469759	4.1562	3.23588e-05	0.000216358	X	CG6847
FBgn0039489	138.914	0.685035	0.164833	4.15593	3.23967e-05	0.000216471	3R	CG5880
FBgn0010909	7129.66	0.629205	0.151418	4.15542	3.24694e-05	0.000216815	3L	msn
FBgn0033720	11.0317	4.3372	1.04397	4.15454	3.25946e-05	0.000217509	2R	CG13160
FBgn0052668	29.4928	2.27886	0.548598	4.15398	3.26745e-05	0.000217901	X	CG32668
FBgn0003308	93.9176	-1.36827	0.329442	-4.15331	3.27698e-05	0.000218394	3R	ry
FBgn0004368	617.987	-1.04091	0.251066	-4.14599	3.38355e-05	0.00022535	X	Ptp4E
FBgn0032252	210.579	-1.15309	0.278261	-4.14392	3.41412e-05	0.000227239	2L	loh
FBgn0031043	733.251	0.448019	0.108148	4.14265	3.43315e-05	0.000228357	X	Naa20A
FBgn0029826	69.4719	-1.41821	0.34247	-4.14112	3.45618e-05	0.00022974	X	CG6041
FBgn0050373	285.566	-0.968628	0.233915	-4.14094	3.4588e-05	0.000229765	2R	CG30373
FBgn0037721	36.9758	2.25221	0.544023	4.13992	3.47423e-05	0.000230496	3R	CG9427
FBgn0052226	1172.83	0.60782	0.146819	4.13992	3.4743e-05	0.000230496	3L	Pex23
FBgn0028983	250.877	-0.792097	0.191362	-4.13927	3.48417e-05	0.000230852	2R	Spn55B
FBgn0036920	366.201	0.588003	0.142051	4.13937	3.48259e-05	0.000230852	3L	CG8004
FBgn0002590	30994.5	0.395867	0.0956792	4.13744	3.51207e-05	0.00023255	X	RpS5a
FBgn0029823	3551.99	-0.626615	0.151539	-4.135	3.54949e-05	0.000234876	X	Shmt
FBgn0003950	590.136	-0.802903	0.194196	-4.1345	3.55727e-05	0.000235239	X	unc
FBgn0033526	610.548	-0.697307	0.168746	-4.1323	3.59154e-05	0.000237199	2R	Caf1-105
FBgn0264291	663.125	-0.540818	0.130873	-4.1324	3.58995e-05	0.000237199	3R	Det
FBgn0026261	315.009	-0.581983	0.140874	-4.13123	3.6082e-05	0.000237993	2R	bonsai
FBgn0030697	57.4937	1.75737	0.425371	4.13138	3.6059e-05	0.000237993	X	CG8565
FBgn0039178	17.4292	2.30441	0.558113	4.12893	3.64462e-05	0.000240146	3R	CG6356
FBgn0029882	1324.04	-0.650552	0.157562	-4.12887	3.64553e-05	0.000240146	X	CG3226
FBgn0051133	247.714	-0.730544	0.176965	-4.12818	3.65642e-05	0.000240554	3R	Slimp
FBgn0041210	1953.2	0.607727	0.14721	4.12829	3.6547e-05	0.000240554	X	HDAC4
FBgn0266848	2865.73	0.462498	0.112038	4.12803	3.65891e-05	0.000240563	X	wap
FBgn0285948	27762.7	0.458958	0.11119	4.12768	3.66435e-05	0.000240767	2L	RpL27A
FBgn0010417	815.874	-0.419028	0.101545	-4.12655	3.68253e-05	0.000241806	3L	Taf6
FBgn0036806	19.3923	2.83288	0.686948	4.12386	3.72577e-05	0.000244488	3L	Cyp12c1
FBgn0032689	1184.7	0.400195	0.0971165	4.12077	3.77604e-05	0.000247568	2L	CG10413
FBgn0050496	224.237	-0.79951	0.194024	-4.12068	3.77753e-05	0.000247568	2R	CG30496
FBgn0025726	7006.75	0.697479	0.169372	4.11803	3.82117e-05	0.000250269	4	unc-13
FBgn0034894	350.22	0.502062	0.121942	4.11722	3.83475e-05	0.000250997	2R	sigmar
FBgn0004913	2714.15	-0.554592	0.134707	-4.11704	3.83778e-05	0.000251035	3R	Gnf1
FBgn0260660	110.332	1.94048	0.471486	4.11567	3.86051e-05	0.000252361	3L	Mp
FBgn0033209	394.077	-0.797896	0.193887	-4.11526	3.8675e-05	0.000252657	2R	CG12107
FBgn0004921	4811.88	-0.689375	0.167578	-4.11375	3.89275e-05	0.000254126	2R	Ggamma1
FBgn0030969	568.59	0.56244	0.136726	4.11363	3.89494e-05	0.000254126	X	Usp39
FBgn0260817	408.518	-0.55111	0.134066	-4.11073	3.94405e-05	0.000257166	2L	gkt
FBgn0051998	1449.49	0.630458	0.153421	4.10933	3.96813e-05	0.000258572	4	CG31998
FBgn0035206	479.822	-0.620384	0.151095	-4.10593	4.027e-05	0.000262241	3L	CG9186
FBgn0029660	20.3581	3.50377	0.853442	4.10546	4.03503e-05	0.000262597	X	CG10801
FBgn0035622	1216.71	0.496002	0.120872	4.10352	4.06918e-05	0.000264651	3L	TM9SF3
FBgn0259834	278.403	1.60061	0.390125	4.10283	4.08126e-05	0.000265269	X	out
FBgn0037044	552.119	-0.655932	0.159935	-4.10125	4.10921e-05	0.000266916	3L	Pdss2
FBgn0010300	5183.45	0.845066	0.206104	4.1002	4.12801e-05	0.000267968	2L	brat
FBgn0039969	1200.8	0.564358	0.137658	4.09973	4.13637e-05	0.000268171	2R	Fis1
FBgn0014141	5296.25	1.22675	0.29922	4.09983	4.13455e-05	0.000268171	3R	cher
FBgn0052772	905.254	-0.501943	0.122454	-4.09903	4.14879e-05	0.000268636	X	CG32772
FBgn0264449	353.08	-1.32359	0.322892	-4.09917	4.14628e-05	0.000268636	X	CG43867
FBgn0035987	664.673	-0.590801	0.144247	-4.09577	4.20762e-05	0.000272273	3L	Cpsf5
FBgn0033085	115.07	-0.860186	0.210245	-4.09135	4.28863e-05	0.00027734	2R	CG15908
FBgn0250816	1486.14	0.971285	0.237483	4.08991	4.31537e-05	0.000278894	3L	AGO3
FBgn0010551	3144.92	-0.600329	0.14681	-4.08916	4.32932e-05	0.000279619	2R	Phb2
FBgn0015589	2012.68	1.04319	0.255122	4.08899	4.3325e-05	0.000279648	3R	Apc
FBgn0003071	1774.32	-1.24524	0.304718	-4.08654	4.37856e-05	0.000282443	2R	Pfk
FBgn0031418	2290.77	-0.682462	0.167048	-4.08542	4.39968e-05	0.000283627	2L	CG3609
FBgn0262819	18.4509	-4.56671	1.11815	-4.08416	4.42365e-05	0.000284993	2R	CG43190
FBgn0031998	24.1661	1.54788	0.37907	4.08336	4.43896e-05	0.000285441	2L	SLC5A11
FBgn0039297	23.4258	-1.85607	0.454538	-4.08342	4.43783e-05	0.000285441	3R	CG11852
FBgn0265612	98.3769	1.2728	0.311696	4.08347	4.43677e-05	0.000285441	X	lncRNA:CR44430
FBgn0261791	925.692	-0.847368	0.207639	-4.08097	4.48484e-05	0.000288211	X	SNRPG
FBgn0011204	1831.17	-0.651209	0.15959	-4.08053	4.4934e-05	0.00028858	3L	cue
FBgn0040373	404.003	-0.80993	0.198526	-4.07972	4.50894e-05	0.000289332	X	CG3038
FBgn0027521	66.8175	-1.14021	0.279488	-4.07963	4.51076e-05	0.000289332	X	CG3679
FBgn0010611	2847.38	-0.814829	0.199745	-4.07934	4.51645e-05	0.000289516	2R	Hmgs
FBgn0041111	1144.99	0.42775	0.104888	4.07817	4.53922e-05	0.000290794	2L	lilli
FBgn0261984	1642.44	-0.491195	0.120456	-4.0778	4.54646e-05	0.000291076	3R	Ire1
FBgn0037574	162.332	-0.677205	0.16611	-4.07684	4.56512e-05	0.000292088	3R	Coq2
FBgn0038545	93.2356	-1.14912	0.281985	-4.07511	4.59935e-05	0.000294017	3R	pasi1
FBgn0036761	734.697	-0.585906	0.14378	-4.07502	4.60101e-05	0.000294017	3L	MED19
FBgn0264711	32.9853	2.16873	0.532318	4.07413	4.61864e-05	0.00029496	3L	CG43980
FBgn0024811	686.216	0.548296	0.134595	4.07367	4.62775e-05	0.000295358	4	Crk
FBgn0261550	1499.5	0.721147	0.177039	4.07338	4.63362e-05	0.000295548	3R	CG42668
FBgn0030634	42.7203	2.04216	0.501362	4.07322	4.63681e-05	0.000295568	X	CG9164
FBgn0031775	60.3221	-1.26306	0.310124	-4.07276	4.64584e-05	0.000295959	2L	CG9150
FBgn0032857	7.82937	3.70045	0.909263	4.06973	4.70682e-05	0.000299658	2L	CG10947
FBgn0250821	19.0697	2.47951	0.609435	4.06853	4.73105e-05	0.000301013	3R	CG14644
FBgn0035983	614.283	0.746899	0.183613	4.06778	4.74627e-05	0.000301795	3L	CG4080
FBgn0260962	3133.56	0.494272	0.121552	4.06633	4.77584e-05	0.000303487	3R	pic
FBgn0015600	850.531	1.22033	0.300198	4.0651	4.80121e-05	0.00030491	2L	toc
FBgn0029705	11.2199	4.33198	1.06615	4.0632	4.8404e-05	0.000307208	X	CG12693
FBgn0052672	6265.26	0.567379	0.13974	4.06024	4.90217e-05	0.000310936	X	Atg8a
FBgn0029999	558.808	0.501824	0.123699	4.05681	4.97485e-05	0.000315351	X	CG1575
FBgn0040382	728.962	-0.627283	0.154746	-4.05363	5.04281e-05	0.000319461	X	CG5273
FBgn0039006	903.631	-0.82342	0.203166	-4.05294	5.05786e-05	0.000320217	3R	Cyp6d4
FBgn0035947	1058.54	0.445643	0.110004	4.05114	5.09693e-05	0.000322491	3L	Srp68
FBgn0051759	205.114	-0.812782	0.200642	-4.0509	5.10207e-05	0.000322617	2L	CG31759
FBgn0040351	57.1202	1.48169	0.366025	4.04806	5.16437e-05	0.000326355	X	CG11638
FBgn0015576	10.4295	4.9127	1.21392	4.04697	5.18843e-05	0.000327674	3R	alpha-Est8
FBgn0085436	8277.21	0.508688	0.12575	4.04524	5.22693e-05	0.000329901	2R	Not1
FBgn0010314	618.646	-0.944455	0.233496	-4.04484	5.23583e-05	0.000330057	2L	Cks30A
FBgn0035539	24.2112	3.26387	0.806902	4.04493	5.23382e-05	0.000330057	3L	slow
FBgn0039564	274.593	-0.556653	0.137642	-4.04422	5.24986e-05	0.000330738	3R	Nep7
FBgn0037749	374.141	-0.843295	0.20864	-4.04187	5.30257e-05	0.000333853	3R	CG9471
FBgn0028336	1282.3	-0.747097	0.184847	-4.04171	5.30623e-05	0.000333879	X	NA
FBgn0085612	16.4985	2.21438	0.54805	4.04047	5.33436e-05	0.000335443	3L	CR41320
FBgn0010391	1538.27	-0.546044	0.135167	-4.03977	5.35048e-05	0.00033625	X	Gtp-bp
FBgn0033691	696.678	-0.8645	0.214107	-4.03771	5.39766e-05	0.000339007	2R	CG8860
FBgn0035872	1965.83	-0.577323	0.143065	-4.03539	5.4511e-05	0.000342154	3L	Cpsf6
FBgn0015609	15.6867	2.56782	0.63643	4.03473	5.46658e-05	0.000342916	2L	CadN
FBgn0083968	206.073	-0.983599	0.243839	-4.03381	5.48801e-05	0.00034405	2L	CG34132
FBgn0014023	396.342	-0.576879	0.143028	-4.03335	5.49882e-05	0.000344516	3R	mRpL47
FBgn0266916	780.389	-0.710491	0.17619	-4.03253	5.51807e-05	0.000345512	3R	Cenp-C
FBgn0037339	1404.15	0.667291	0.16562	4.02906	5.60004e-05	0.00035043	3R	Pi4KIIalpha
FBgn0029868	1088.42	-0.525094	0.130334	-4.02885	5.60511e-05	0.000350533	X	ND-B16.6
FBgn0038948	1171.3	-0.56961	0.14148	-4.02609	5.67116e-05	0.000354447	3R	PSR
FBgn0266420	717.965	-0.84986	0.211237	-4.02325	5.74002e-05	0.000358533	2R	Ote
FBgn0004378	1876.92	-0.780949	0.194235	-4.02064	5.80407e-05	0.000362092	3L	Klp61F
FBgn0036760	239.34	-0.686866	0.170834	-4.02066	5.80341e-05	0.000362092	3L	CG5567
FBgn0040773	1247.74	-0.628583	0.156363	-4.02004	5.81887e-05	0.000362696	2R	COX7C
FBgn0266331	7.71916	3.34173	0.831292	4.01992	5.82177e-05	0.000362696	2L	asRNA:CR44996
FBgn0044030	198.658	-1.15017	0.286125	-4.01982	5.82437e-05	0.000362696	X	mRpS14
FBgn0022984	500.659	0.645455	0.160734	4.01568	5.92752e-05	0.000368896	2R	qkr58E-3
FBgn0038652	1045.18	1.39441	0.34756	4.012	6.02062e-05	0.000374462	3R	CG7720
FBgn0037225	19.351	2.27571	0.567316	4.01137	6.03675e-05	0.000375238	3R	TwdlG
FBgn0025381	1537.06	-0.587657	0.146517	-4.01084	6.05023e-05	0.000375848	X	rush
FBgn0020386	2265.16	0.621844	0.155065	4.0102	6.06664e-05	0.000376639	3L	Pdk1
FBgn0037000	65.8491	1.26691	0.315942	4.00995	6.07306e-05	0.000376809	3L	ZnT77C
FBgn0032433	182.575	1.245	0.310517	4.00943	6.08644e-05	0.000377411	2L	Oatp33Ea
FBgn0035590	151.229	-0.762941	0.190328	-4.00856	6.10914e-05	0.000378589	3L	Prpk
FBgn0051612	30.9094	-1.39909	0.349323	-4.00515	6.19781e-05	0.000383853	2L	CG31612
FBgn0261349	74.7659	-1.65699	0.4139	-4.00335	6.24505e-05	0.000386545	2L	Mst36Fb
FBgn0260938	1243.19	-0.368315	0.0920078	-4.00309	6.25209e-05	0.000386747	X	tay
FBgn0034253	228.899	-0.941658	0.235355	-4.00101	6.30715e-05	0.000389917	2R	CG10936
FBgn0039902	926.476	0.537444	0.134368	3.99979	6.33997e-05	0.00039171	4	Zip102B
FBgn0034737	17.8722	2.11301	0.528499	3.99813	6.3844e-05	0.000394217	2R	CG11362
FBgn0034361	199.99	-0.684066	0.171137	-3.99719	6.40989e-05	0.000395553	2R	mRpS28
FBgn0017457	735.848	-0.433893	0.108575	-3.99625	6.43537e-05	0.000396887	2L	U2af38
FBgn0001247	2008.02	-0.456736	0.114413	-3.99199	6.55201e-05	0.000403352	3L	Ide
FBgn0002174	627.449	-0.481628	0.12064	-3.99228	6.5442e-05	0.000403352	2R	CG5504
FBgn0087012	6.22281	5.55541	1.39162	3.99205	6.55054e-05	0.000403352	3R	5-HT2A
FBgn0039307	62.6032	-0.938535	0.235151	-3.99121	6.57381e-05	0.000404451	3R	CR13656
FBgn0029874	310.494	0.592479	0.148556	3.98825	6.65632e-05	0.000409282	X	CG3342
FBgn0013772	620.049	2.44291	0.612639	3.98751	6.67703e-05	0.000410309	2R	Cyp6a8
FBgn0028837	508.969	0.570952	0.143267	3.98523	6.74141e-05	0.000414017	3R	CSN6
FBgn0002891	1461.39	-0.619863	0.155605	-3.98358	6.78851e-05	0.00041666	2R	mus205
FBgn0003371	2603.22	0.442586	0.111123	3.98286	6.80916e-05	0.000417677	X	sgg
FBgn0043002	417.694	-0.920371	0.231221	-3.98049	6.87734e-05	0.000421608	2L	Chrac-14
FBgn0260386	150.229	-1.09616	0.275667	-3.97639	6.99685e-05	0.000428678	3R	mtg
FBgn0060296	55.8183	-1.97148	0.495918	-3.97541	7.02587e-05	0.000430198	2R	pain
FBgn0025394	1268.82	0.557703	0.140351	3.97363	7.07854e-05	0.000433164	X	inc
FBgn0261859	2135.11	1.07074	0.269554	3.97224	7.11991e-05	0.000435436	3R	CG42788
FBgn0003721	6472.54	-0.655027	0.164978	-3.9704	7.17517e-05	0.000438293	3R	Tm1
FBgn0052549	2286.05	0.942374	0.237342	3.97053	7.17139e-05	0.000438293	X	CG32549
FBgn0032723	733.442	-0.696914	0.175537	-3.97019	7.18152e-05	0.000438419	2L	ssp3
FBgn0032601	42.1757	-1.9197	0.483573	-3.96983	7.19235e-05	0.000438819	2L	yellow-b
FBgn0004456	631.53	1.26264	0.318245	3.96751	7.2628e-05	0.000442854	X	mew
FBgn0039908	502.707	-0.495087	0.124833	-3.966	7.30895e-05	0.000445403	4	Asator
FBgn0032910	8.51498	4.73323	1.1942	3.9635	7.38574e-05	0.000449815	2L	CG9265
FBgn0050340	159.642	0.905249	0.228422	3.96305	7.3998e-05	0.000450404	2R	CG30340
FBgn0033019	462.485	0.710791	0.179416	3.9617	7.44188e-05	0.000452696	2R	CG10395
FBgn0266685	17.1299	-1.76955	0.446911	-3.9595	7.51064e-05	0.000456607	3L	asRNA:CR45175
FBgn0033879	1758.32	-0.87087	0.21998	-3.95886	7.53079e-05	0.000457561	2R	Echs1
FBgn0038478	697.069	-0.565644	0.143038	-3.95449	7.66975e-05	0.000465728	3R	cal1
FBgn0031883	867.478	-0.662351	0.167663	-3.9505	7.79882e-05	0.000473285	2L	Caper
FBgn0000562	630.86	-0.571458	0.144668	-3.95013	7.81086e-05	0.000473736	2R	egl
FBgn0001250	65.147	2.14661	0.543839	3.94715	7.90886e-05	0.000479396	X	if
FBgn0031505	739.143	-0.654394	0.165848	-3.94575	7.95504e-05	0.00048191	2L	ND-B14.5B
FBgn0039099	41.362	-1.99563	0.506186	-3.94248	8.0645e-05	0.000488252	3R	GILT2
FBgn0260634	1870.27	0.485883	0.123257	3.94203	8.07952e-05	0.000488873	3R	eIF4G2
FBgn0262018	1396.75	0.98352	0.249527	3.94154	8.09588e-05	0.000489574	2L	CadN2
FBgn0266268	1648.1	-0.902342	0.228965	-3.94096	8.11563e-05	0.000490479	3R	FeCH
FBgn0036331	149.429	0.763358	0.193736	3.94021	8.14109e-05	0.000491727	3L	CG14117
FBgn0053260	38.6544	-1.22111	0.309937	-3.93988	8.15234e-05	0.000492117	3L	CG33260
FBgn0035027	386.308	-0.542301	0.137736	-3.93724	8.24228e-05	0.000497021	2R	CG3511
FBgn0267923	68.8172	1.70032	0.431859	3.93721	8.24327e-05	0.000497021	2L	lncRNA:CR46204
FBgn0027841	208.477	-0.571741	0.145278	-3.93548	8.3029e-05	0.00050026	3R	CstF64
FBgn0035719	156.838	-1.04142	0.26463	-3.93537	8.30675e-05	0.00050026	3L	tow
FBgn0016120	1504.51	-0.629675	0.16003	-3.93473	8.329e-05	0.000501011	3R	ATPsynD
FBgn0050493	232.016	-0.967383	0.245854	-3.93478	8.3272e-05	0.000501011	2R	Coq9
FBgn0038842	328.594	1.02847	0.261577	3.93182	8.43063e-05	0.000506827	3R	hdly
FBgn0001220	11951.7	-0.678923	0.172685	-3.93156	8.43969e-05	0.000507074	2R	Hsc70-5
FBgn0037716	327.393	0.49817	0.126749	3.93038	8.4813e-05	0.000509275	3R	Son
FBgn0042131	17.9396	-2.1706	0.552386	-3.9295	8.51241e-05	0.000510844	3L	CG18808
FBgn0029137	101.356	-0.87773	0.223453	-3.92803	8.56438e-05	0.000513662	2L	Patsas
FBgn0034971	1067.58	-0.564126	0.143622	-3.92786	8.57043e-05	0.000513724	2R	Gpat4
FBgn0039048	16.5299	2.15677	0.549122	3.92768	8.57709e-05	0.000513823	3R	CG17111
FBgn0015926	374.505	-0.991261	0.252412	-3.92715	8.59586e-05	0.000514647	X	dah
FBgn0033540	286.826	-0.610008	0.155548	-3.92168	8.7934e-05	0.000526167	2R	Elp2
FBgn0033244	976.853	0.41073	0.104741	3.92139	8.80411e-05	0.0005265	2R	CG8726
FBgn0034744	506.065	-0.560875	0.143068	-3.92033	8.84284e-05	0.000528508	2R	Vps20
FBgn0028397	231.074	-1.03183	0.263395	-3.91743	8.94998e-05	0.000534377	X	Tob
FBgn0032156	553.599	-0.721618	0.184209	-3.91739	8.95147e-05	0.000534377	2L	CG13124
FBgn0024984	7.10992	-2.88555	0.736861	-3.91601	9.00281e-05	0.000537129	X	CG3457
FBgn0030028	16.9467	2.27212	0.580655	3.91304	9.11423e-05	0.000543145	X	Corp
FBgn0034657	620.321	-1.07393	0.274447	-3.91308	9.1126e-05	0.000543145	2R	LBR
FBgn0010620	39.8402	1.72525	0.44104	3.91177	9.16215e-05	0.000545683	2R	CG10939
FBgn0039863	1954.77	-0.660558	0.168917	-3.91055	9.20857e-05	0.000548129	3R	CG1815
FBgn0039698	257.21	0.544024	0.139123	3.91039	9.2146e-05	0.00054817	3R	CG7789
FBgn0263397	6.08412	3.20299	0.819397	3.90896	9.26953e-05	0.000551118	2R	Ih
FBgn0035231	101.347	-1.08825	0.278498	-3.90755	9.32376e-05	0.00055402	3L	Pcyt2
FBgn0000147	376.091	-0.749764	0.191909	-3.90688	9.34942e-05	0.000555223	3R	aurA
FBgn0265510	3.28393	5.82965	1.49234	3.90638	9.36883e-05	0.000556054	2R	asRNA:CR44372
FBgn0032620	862.312	-0.83143	0.212906	-3.90514	9.41697e-05	0.000558588	2L	CG12288
FBgn0031696	373.286	0.464918	0.11917	3.90129	9.56816e-05	0.000567228	2L	Bub1
FBgn0035575	30.9421	-1.7644	0.452532	-3.89896	9.66062e-05	0.000572378	3L	CG7509
FBgn0036581	478.709	-0.532372	0.136637	-3.89625	9.76921e-05	0.000578477	3L	MED10
FBgn0023083	1077.11	0.55165	0.141593	3.89604	9.77799e-05	0.000578663	3R	fray
FBgn0005640	1217.35	0.637475	0.163651	3.89534	9.80602e-05	0.000579987	3L	Eip63E
FBgn0028946	5.82938	5.06347	1.30017	3.89447	9.84146e-05	0.000581747	2L	Or35a
FBgn0038049	1052.08	-0.421959	0.108382	-3.89326	9.89046e-05	0.000584307	3R	CG5844
FBgn0016081	1442	0.62151	0.159682	3.89217	9.93519e-05	0.000586611	3L	fry
FBgn0023530	172.113	-0.709137	0.182212	-3.89183	9.94895e-05	0.000587085	X	CG3740
FBgn0267727	4118.92	-0.595604	0.153074	-3.89095	9.9853e-05	0.000588891	2L	Pen
FBgn0262124	2770.75	0.834567	0.214516	3.89046	0.000100052	0.000589728	2R	uex
FBgn0038390	291.657	-0.760248	0.195433	-3.89007	0.000100217	0.000590359	3R	Rbf2
FBgn0034033	103.791	-0.739932	0.190277	-3.88871	0.000100778	0.000593325	2R	CG8204
FBgn0051676	251.504	1.17607	0.302479	3.88812	0.000101022	0.000594296	2L	CG31676
FBgn0035589	231.292	-0.76254	0.196125	-3.88803	0.000101059	0.000594296	3L	CHMP2B
FBgn0052801	38.8353	-1.3162	0.338558	-3.88768	0.000101206	0.00059482	X	CG32801
FBgn0034031	11.4747	-2.96475	0.762847	-3.88643	0.00010173	0.000597555	2R	CG12963
FBgn0267703	9.7061	2.32743	0.598978	3.88567	0.000102049	0.000599087	3R	lncRNA:CR46036
FBgn0010894	131.3	-1.09637	0.282176	-3.8854	0.000102162	0.000599405	3L	sinu
FBgn0033842	540.952	0.476346	0.122632	3.88437	0.000102597	0.000601614	2R	cbc
FBgn0031952	450.821	-0.575905	0.148294	-3.88352	0.000102955	0.000603366	2L	cdc14
FBgn0030581	517.433	-0.414902	0.106853	-3.8829	0.000103216	0.000604551	X	CG14408
FBgn0030292	272.843	-0.928101	0.239079	-3.88198	0.000103611	0.000606517	X	CG11752
FBgn0032961	2612.21	-0.619443	0.15958	-3.8817	0.000103729	0.000606863	2L	CG1416
FBgn0030501	3600.29	-0.733077	0.1889	-3.88076	0.000104128	0.000608852	X	BthD
FBgn0015520	287.587	-0.537809	0.138707	-3.87731	0.000105616	0.000616848	3R	nonA-l
FBgn0260750	280.585	-0.508723	0.13121	-3.87717	0.000105677	0.000616848	2L	Mulk
FBgn0001105	8893.22	0.60163	0.155172	3.8772	0.000105667	0.000616848	X	Gbeta13F
FBgn0051551	8.45712	3.8016	0.980619	3.87673	0.000105868	0.000617614	3R	CG31551
FBgn0283473	282.112	-0.520468	0.134277	-3.87609	0.000106149	0.000618903	X	S6KL
FBgn0265298	930.176	-0.659936	0.170344	-3.87413	0.000107006	0.000623541	2L	SC35
FBgn0028956	880.623	-0.877969	0.226792	-3.87126	0.000108276	0.000630587	2R	mthl3
FBgn0040372	864.522	-0.587247	0.151781	-3.86903	0.000109267	0.000635996	X	G9a
FBgn0035603	363.424	-0.890758	0.230275	-3.86823	0.000109628	0.000637735	3L	Pfdn4
FBgn0031327	9.89222	2.67259	0.69136	3.8657	0.000110773	0.000644026	2L	CG5397
FBgn0028379	17.0217	2.32349	0.601635	3.86197	0.000112479	0.000653574	3L	fan
FBgn0031516	260.846	0.534009	0.138303	3.86116	0.000112851	0.000655366	2L	CG9663
FBgn0038425	227.014	-0.75847	0.196585	-3.85822	0.000114214	0.000662906	3R	CG14881
FBgn0267976	1867.36	0.422273	0.109461	3.85774	0.000114438	0.000663832	2L	Tim23
FBgn0259749	953.276	0.639839	0.165982	3.85487	0.00011579	0.000671294	2L	mmy
FBgn0031957	79.3523	4.04323	1.04912	3.85391	0.000116244	0.000673509	2L	TwdlE
FBgn0030876	334.714	-0.936526	0.243014	-3.85379	0.000116304	0.000673509	X	CG6762
FBgn0001227	58.3255	1.30345	0.338283	3.85312	0.000116621	0.000674964	3L	Hsp67Ba
FBgn0029873	1165.42	-0.453246	0.117674	-3.8517	0.0001173	0.00067851	X	CG3918
FBgn0029664	905.443	-0.791879	0.205614	-3.85129	0.000117497	0.000678887	X	CG10802
FBgn0010329	202.157	2.74423	0.712545	3.85131	0.000117488	0.000678887	X	Tbh
FBgn0053002	200.732	-1.01938	0.264723	-3.85075	0.000117757	0.000680007	2L	mRpL27
FBgn0037713	104.096	0.809113	0.210203	3.84921	0.000118501	0.000683918	3R	CG16790
FBgn0036557	519.708	-0.503112	0.130738	-3.84825	0.000118963	0.000686194	3L	mRpS31
FBgn0011715	575.316	-0.636008	0.165346	-3.84654	0.000119799	0.000690629	3R	Snr1
FBgn0031738	481.688	1.1486	0.298651	3.84597	0.000120075	0.000691834	2L	CG9171
FBgn0033766	1199.93	-0.554401	0.144173	-3.84538	0.000120367	0.000693122	2R	Nup188
FBgn0052181	45.7618	2.46868	0.642152	3.84438	0.000120857	0.000695556	3L	CG32181
FBgn0029158	773.187	-0.482541	0.125556	-3.84323	0.000121426	0.000698439	3L	Las
FBgn0037106	152.563	-0.611326	0.159142	-3.84139	0.000122338	0.000703289	3L	CG11307
FBgn0035432	1933.05	0.966546	0.251632	3.84111	0.000122479	0.000703703	3L	ZnT63C
FBgn0260658	299.417	-1.06816	0.278116	-3.8407	0.000122685	0.000704492	X	CG42541
FBgn0031598	243.305	-0.615373	0.160396	-3.83659	0.000124753	0.000715966	2L	Vps53
FBgn0036043	1451.92	1.44725	0.377256	3.83625	0.000124929	0.000716577	3L	CG8177
FBgn0033897	1422.36	-0.641902	0.167433	-3.83377	0.000126194	0.000723425	2R	Rcd1
FBgn0034792	1276.55	-0.566426	0.147795	-3.83251	0.000126844	0.000726747	2R	YME1L
FBgn0014018	2045.23	0.409827	0.107016	3.82958	0.000128363	0.000735042	3R	Rel
FBgn0037018	253.558	-0.525988	0.137366	-3.82909	0.000128615	0.000736074	3L	CG4042
FBgn0283442	44.7672	2.10257	0.549554	3.82596	0.000130264	0.000745091	2L	vas
FBgn0027866	2133.09	-0.343678	0.089919	-3.82208	0.00013233	0.000756488	3R	CG9776
FBgn0033264	934.997	-0.434702	0.113776	-3.82067	0.00013309	0.000760407	2R	Nup50
FBgn0029861	632.364	-0.892353	0.2336	-3.82	0.000133452	0.000762055	X	CG3815
FBgn0262467	401.144	-0.458938	0.120148	-3.81978	0.000133571	0.000762305	2L	Scox
FBgn0263339	18.9486	2.16386	0.566524	3.81955	0.000133697	0.0007626	2L	lncRNA:CR43420
FBgn0032218	37.3897	1.1704	0.306464	3.81905	0.000133967	0.000763715	2L	CG5381
FBgn0264366	10.4413	3.3299	0.872281	3.81746	0.000134833	0.000768228	2L	lncRNA:CR43818
FBgn0037707	432.002	-0.740868	0.194124	-3.81647	0.000135373	0.000770877	3R	RnpS1
FBgn0261385	2926.93	-0.764498	0.200333	-3.81614	0.000135555	0.000771481	2R	scra
FBgn0035948	371.2	1.57665	0.413352	3.8143	0.00013657	0.000776828	3L	CG5644
FBgn0031776	458.835	-0.678047	0.1778	-3.81354	0.00013699	0.000778784	2L	Pfdn1
FBgn0026431	505.807	-0.474356	0.124399	-3.81319	0.000137184	0.000779456	2L	Grip75
FBgn0030847	33.954	2.09689	0.550098	3.81184	0.000137936	0.000783293	X	CG12991
FBgn0085194	8.99473	3.84923	1.01011	3.81068	0.000138582	0.00078623	2L	CG34165
FBgn0260799	2942.94	0.721536	0.189348	3.81064	0.000138607	0.00078623	2R	p120ctn
FBgn0035558	2837.79	0.957354	0.251269	3.81008	0.00013892	0.000787573	3L	CG11357
FBgn0266311	126.02	-1.33514	0.350436	-3.80992	0.00013901	0.000787644	2L	asRNA:CR44976
FBgn0033395	9.93971	-2.84725	0.74748	-3.80913	0.000139456	0.000789738	2R	Cyp4p2
FBgn0008635	3796.03	-0.654576	0.171899	-3.80791	0.000140147	0.000793212	X	betaCOP
FBgn0264702	89.7844	-1.02402	0.269005	-3.80669	0.000140839	0.000796686	3L	asRNA:CR43971
FBgn0030616	20121.7	0.421397	0.110727	3.80571	0.000141399	0.000799415	X	RpL37a
FBgn0020391	188.734	-0.63223	0.166137	-3.80547	0.000141537	0.000799755	2R	Nrk
FBgn0028540	48.9824	1.38209	0.363214	3.80517	0.000141708	0.000800282	2L	CG9008
FBgn0261674	370.081	0.793808	0.208676	3.80402	0.000142368	0.00080312	3L	CG42709
FBgn0036801	206.305	1.20696	0.317281	3.80408	0.000142333	0.00080312	3L	MYPT-75D
FBgn0000826	171.562	-0.830691	0.218447	-3.80271	0.000143121	0.000806925	X	png
FBgn0285963	20.1787	2.12984	0.560189	3.80199	0.000143536	0.000808819	3R	CG46339
FBgn0050438	21.4376	1.6676	0.438677	3.80143	0.000143862	0.000810211	2R	Ugt50B3
FBgn0038146	694.061	0.710142	0.186856	3.80048	0.000144418	0.000812896	3R	CG9799
FBgn0001991	55.4588	1.62163	0.426877	3.79882	0.000145387	0.000817903	2L	Ca-alpha1D
FBgn0027528	164.054	1.43712	0.378349	3.79841	0.000145629	0.000818816	X	goe
FBgn0027535	1046.82	0.63756	0.167901	3.79722	0.000146325	0.000822278	2R	botv
FBgn0032520	1559.48	-0.421006	0.110912	-3.79585	0.00014714	0.0008264	2L	CG10859
FBgn0039398	18.6289	2.63522	0.694301	3.7955	0.000147344	0.000827094	3R	CG14540
FBgn0032236	566.884	-0.532457	0.140405	-3.7923	0.000149261	0.000837398	2L	mRpS7
FBgn0019830	362.734	-0.545607	0.144032	-3.7881	0.000151807	0.000851213	2L	colt
FBgn0031631	121.848	-0.675565	0.178401	-3.78678	0.000152611	0.000855257	2L	CG3225
FBgn0000568	1765.59	0.699272	0.184699	3.78601	0.000153088	0.000857462	3L	Eip75B
FBgn0035468	11.1355	3.34712	0.884177	3.78557	0.000153354	0.000858482	3L	Gr63a
FBgn0026176	272.761	-0.955876	0.252523	-3.78531	0.00015352	0.00085894	2R	SkpB
FBgn0001122	1373.2	1.05812	0.279792	3.78181	0.000155693	0.000870625	2R	Galphao
FBgn0025697	6.50083	3.58704	0.949074	3.77952	0.000157133	0.000877966	2L	santa-maria
FBgn0035805	335.759	-0.710401	0.187964	-3.77945	0.000157177	0.000877966	3L	CG7506
FBgn0024315	42.1043	2.02609	0.536173	3.7788	0.000157587	0.000879775	2R	Picot
FBgn0267281	30.4365	-1.54794	0.40968	-3.7784	0.000157841	0.000880715	2L	lncRNA:CR45717
FBgn0033015	1836.81	0.557708	0.147661	3.77694	0.000158766	0.000885392	2R	d4
FBgn0050463	307.649	2.33583	0.618946	3.77389	0.000160723	0.000895817	2R	Pgant9
FBgn0033158	12.543	3.44256	0.912661	3.772	0.000161943	0.000902129	2R	CG12164
FBgn0032032	351.615	-0.571852	0.151615	-3.77174	0.000162112	0.000902581	2L	CG17294
FBgn0035445	4130.82	-1.22387	0.32452	-3.77132	0.000162389	0.000903631	3L	Ids
FBgn0032598	864.879	-0.920939	0.244227	-3.77084	0.0001627	0.000903891	2L	ChLD3
FBgn0033581	827.617	-0.560325	0.14859	-3.77094	0.000162635	0.000903891	2R	CG12391
FBgn0003250	208.235	-0.83769	0.222147	-3.77088	0.000162674	0.000903891	3L	Rh4
FBgn0029932	4.40077	4.90275	1.30036	3.7703	0.000163051	0.000905349	X	CG4607
FBgn0052473	686.508	0.464938	0.123423	3.76704	0.000165191	0.000916736	3R	CG32473
FBgn0027579	1009.44	-0.346528	0.0920031	-3.76648	0.000165566	0.000918318	3R	mino
FBgn0025682	6904.27	0.54343	0.144287	3.7663	0.000165684	0.000918475	3L	scf
FBgn0037315	560.113	0.876531	0.232898	3.76358	0.000167501	0.000928046	3R	Cerk
FBgn0032536	76.0146	0.959041	0.254908	3.7623	0.000168359	0.000931794	2L	Ance-3
FBgn0266019	1613.98	-0.541972	0.144049	-3.76241	0.000168283	0.000931794	X	rudhira
FBgn0263740	3146.79	-0.607083	0.161402	-3.76131	0.000169024	0.000934966	3R	eIF2gamma
FBgn0036661	2335.86	-0.511768	0.136067	-3.76114	0.000169142	0.000935116	3L	CG9705
FBgn0030432	34.7546	-1.25189	0.333036	-3.75902	0.000170582	0.000942566	X	CG4404
FBgn0031377	566.961	-0.460239	0.12245	-3.7586	0.000170866	0.000943629	2L	CG15356
FBgn0015269	1169.46	-0.409295	0.108905	-3.75827	0.000171091	0.000944365	3R	Nf1
FBgn0038586	281.371	0.748673	0.199227	3.7579	0.000171348	0.000945271	3R	CG7168
FBgn0030740	3869.63	0.740162	0.196979	3.75757	0.000171575	0.000946015	X	CG9917
FBgn0046301	272.149	0.527422	0.140463	3.75487	0.000173431	0.000955733	3L	CG7148
FBgn0000447	1302.79	-0.449387	0.119694	-3.75448	0.000173701	0.000956197	3R	Dhod
FBgn0031574	85.0826	-0.834861	0.222359	-3.75457	0.000173642	0.000956197	2L	TTLL4B
FBgn0030874	102.741	0.802599	0.213848	3.75313	0.000174638	0.000960837	X	Spt7
FBgn0034467	25.6903	2.73854	0.729838	3.75226	0.000175248	0.000963679	2R	CG15128
FBgn0030349	950.345	-0.547601	0.145948	-3.75203	0.000175409	0.000964045	X	CG10353
FBgn0036576	643.562	0.569853	0.151887	3.75182	0.000175554	0.000964324	3L	CG5151
FBgn0050345	72.822	-0.889761	0.237205	-3.75103	0.000176111	0.000966868	2R	CG30345
FBgn0050021	115.913	-1.18152	0.315126	-3.74936	0.000177288	0.000972806	2R	metro
FBgn0002873	1697.51	-0.709377	0.189242	-3.74852	0.000177883	0.00097555	X	mud
FBgn0038014	117.135	-0.810362	0.216428	-3.74426	0.000180927	0.000991711	3R	CG10041
FBgn0263143	893.305	-0.525125	0.140316	-3.74243	0.000182249	0.000998425	3R	vret
FBgn0015396	1661.28	0.734638	0.196315	3.74214	0.000182456	0.000999026	3R	jumu
FBgn0259113	1800.71	-0.388863	0.103936	-3.74137	0.00018302	0.00100158	3R	DNApol-alpha180
FBgn0026876	785.538	-0.440408	0.117752	-3.74013	0.000183926	0.001006	X	CG11403
FBgn0039879	19.8511	-1.71136	0.4578	-3.73822	0.000185326	0.00101312	3R	Ir100a
FBgn0030871	702.146	-0.652931	0.174706	-3.73731	0.000185998	0.00101625	X	CG8142
FBgn0001142	1001.66	1.12073	0.299905	3.73695	0.000186268	0.00101718	2L	Gs1
FBgn0037829	12.0676	2.43262	0.651198	3.73561	0.000187263	0.00102207	3R	CG14691
FBgn0033802	147.747	-0.875171	0.234313	-3.73506	0.000187672	0.00102376	2R	CG17724
FBgn0261649	77.7826	1.62443	0.434972	3.73455	0.000188048	0.00102526	3R	tinc
FBgn0036288	130.431	1.79084	0.479732	3.733	0.000189213	0.0010306	3L	CG10660
FBgn0036004	913.822	-0.568413	0.152268	-3.73298	0.000189228	0.0010306	3L	Jarid2
FBgn0052016	926.901	0.43331	0.116088	3.73261	0.000189505	0.00103156	4	4E-T
FBgn0001092	14924.6	-0.979868	0.262538	-3.73228	0.000189751	0.00103235	X	Gapdh2
FBgn0032988	1483.35	0.531327	0.142391	3.73146	0.000190376	0.0010352	2L	Tif-IA
FBgn0032330	271.013	1.13836	0.305107	3.73102	0.00019071	0.00103592	2L	Samuel
FBgn0034879	457.457	-0.499467	0.133867	-3.73106	0.000190676	0.00103592	2R	Rrp4
FBgn0051029	12.199	-2.66129	0.713484	-3.72999	0.000191488	0.00103959	3R	CG31029
FBgn0033961	196.16	-0.663074	0.177888	-3.72748	0.000193403	0.00104944	2R	ND-B15
FBgn0026316	412.05	-0.565733	0.151823	-3.72626	0.00019434	0.00105396	2R	Ubc10
FBgn0051777	295.521	1.31611	0.353371	3.72444	0.000195749	0.00106104	2L	CG31777
FBgn0000588	504.551	-0.520383	0.139802	-3.72229	0.000197423	0.00106898	2L	esc
FBgn0264273	6.54201	3.80685	1.02269	3.7224	0.000197342	0.00106898	2R	Sema2b
FBgn0052121	6.01466	4.6515	1.24977	3.72187	0.000197749	0.00107018	3L	CG32121
FBgn0027348	25.0109	1.85541	0.498695	3.72053	0.000198802	0.00107531	2L	bgm
FBgn0034197	6.1453	3.65229	0.982297	3.71812	0.000200714	0.00108508	2R	Cda9
FBgn0015031	592.014	-0.59512	0.160176	-3.71541	0.000202878	0.00109621	2L	cype
FBgn0033132	67.4897	-1.09064	0.293558	-3.71525	0.000203	0.00109629	2R	Tsp42Ej
FBgn0033065	10.8569	2.90935	0.783275	3.71434	0.000203737	0.00109969	2R	Cyp6w1
FBgn0038369	578.364	-0.47515	0.127943	-3.71378	0.000204189	0.00110155	3R	Arpc3A
FBgn0265651	91.7075	2.93296	0.789956	3.71281	0.000204969	0.00110517	2R	lncRNA:CR44458
FBgn0261446	7.66946	3.76551	1.01429	3.71247	0.000205245	0.00110608	X	CG13377
FBgn0037025	985.909	-0.81617	0.220021	-3.70951	0.000207658	0.00111849	3L	Spc105R
FBgn0264266	8.18617	2.79883	0.754641	3.70882	0.000208231	0.00112099	2L	lncRNA:CR43766
FBgn0027090	1775.55	-0.36832	0.0993799	-3.70618	0.000210409	0.00113153	3R	GlnRS
FBgn0037746	732.705	-0.678714	0.183128	-3.70623	0.000210367	0.00113153	3R	CG8478
FBgn0002626	23830.7	0.421697	0.113815	3.70511	0.000211298	0.00113571	3R	RpL32
FBgn0051451	343.961	0.908479	0.245425	3.70165	0.000214202	0.00115072	3R	lncRNA:CR31451
FBgn0024365	1158.31	0.430357	0.116282	3.70096	0.000214786	0.00115325	X	CG12773
FBgn0263780	24.869	1.50615	0.407181	3.69898	0.00021647	0.00116168	2R	CG17684
FBgn0037465	463.178	-0.551245	0.149054	-3.69829	0.000217058	0.00116423	3R	CG1105
FBgn0000404	4395.82	-0.665097	0.180046	-3.69403	0.000220724	0.00118327	3L	CycA
FBgn0265068	165.539	1.09902	0.297668	3.6921	0.000222406	0.00119167	3R	asRNA:CR44179
FBgn0262887	207.505	0.696608	0.188738	3.69088	0.000223479	0.00119679	2L	lncRNA:CR43242
FBgn0033349	1774.89	-0.367443	0.0995698	-3.69031	0.000223984	0.00119887	2R	CG8243
FBgn0039213	1708.41	-0.356141	0.0965202	-3.68981	0.000224421	0.00120058	3R	atl
FBgn0038053	393.559	-0.659701	0.178801	-3.68959	0.000224618	0.00120088	3R	CG18549
FBgn0000276	8.99977	3.2853	0.890451	3.68948	0.00022471	0.00120088	3R	CecA1
FBgn0051360	331.461	-0.519309	0.140782	-3.68873	0.000225374	0.00120379	3R	CG31360
FBgn0028396	4.93176	4.37702	1.18676	3.68819	0.000225851	0.00120571	3R	TotA
FBgn0037750	95.8523	0.828109	0.224607	3.68692	0.000226983	0.00121113	3R	Whamy
FBgn0036893	267.492	0.456639	0.123865	3.6866	0.000227273	0.00121205	3L	PIG-F
FBgn0035977	86.3026	1.59263	0.432127	3.68556	0.000228202	0.00121637	3L	PGRP-LF
FBgn0039977	773.116	0.568271	0.154234	3.68446	0.000229186	0.00122097	3L	CG17454
FBgn0051460	307.541	-0.756552	0.205343	-3.68433	0.000229308	0.00122099	3R	CG31460
FBgn0035181	983.584	-0.388262	0.105404	-3.68358	0.000229985	0.00122396	3L	CG9205
FBgn0031256	693.334	-0.547818	0.148784	-3.68198	0.000231434	0.00123103	2L	shv
FBgn0061469	1064.04	-0.343558	0.0933273	-3.68122	0.000232121	0.00123405	3L	Ube3a
FBgn0016122	137.375	1.00463	0.272989	3.68012	0.000233124	0.00123874	2L	Acer
FBgn0030320	561.325	0.512955	0.139395	3.67986	0.000233361	0.00123935	X	CG2247
FBgn0053926	338.545	0.900121	0.244619	3.67968	0.000233524	0.00123958	3L	CG33926
FBgn0262533	60.0378	2.10954	0.573662	3.67733	0.000235688	0.00125042	3L	CR43087
FBgn0259163	13.009	2.92203	0.794773	3.67656	0.000236401	0.00125355	3L	CG42268
FBgn0027111	71.0321	-1.07326	0.291947	-3.67623	0.000236706	0.00125452	3L	miple1
FBgn0027079	2505.96	-0.559119	0.152142	-3.67499	0.00023786	0.00125998	2R	ValRS
FBgn0039645	11.1931	3.91524	1.0656	3.67421	0.000238591	0.0012632	3R	CG11898
FBgn0022702	3501.58	0.715151	0.194651	3.67402	0.000238766	0.00126347	3L	Cht2
FBgn0010352	2485.25	-0.462506	0.12593	-3.67273	0.000239972	0.0012692	3L	Nc73EF
FBgn0025866	1478.27	0.458464	0.124875	3.67139	0.000241239	0.00127525	3L	CalpB
FBgn0051388	116.982	-0.874991	0.238348	-3.67107	0.00024154	0.00127618	3R	CG31388
FBgn0086346	1808.9	-0.394564	0.107527	-3.66943	0.000243087	0.00128369	3R	ALiX
FBgn0086657	564.501	0.474758	0.129389	3.66922	0.000243289	0.0012841	2L	IKKepsilon
FBgn0030030	286.423	0.565949	0.15425	3.66905	0.000243455	0.00128431	X	CG1636
FBgn0028343	3241.49	-0.564325	0.153833	-3.66844	0.000244038	0.00128672	X	Ankle2
FBgn0038426	199.859	-0.836241	0.22797	-3.6682	0.000244261	0.00128724	3R	mRpS33
FBgn0039528	1250.72	0.519968	0.141828	3.66619	0.000246193	0.00129675	3R	dsd
FBgn0011638	6494.43	0.726328	0.198182	3.66494	0.000247393	0.0013024	2L	La
FBgn0005632	5217.22	-0.344844	0.0941022	-3.66456	0.00024776	0.001303	3R	faf
FBgn0052529	8840.17	0.518856	0.141584	3.66466	0.000247663	0.001303	X	Hers
FBgn0027515	318.409	-0.702848	0.19181	-3.66429	0.000248023	0.00130371	2L	CG7115
FBgn0029588	115.945	-0.806111	0.220028	-3.66368	0.000248617	0.00130616	X	CG14798
FBgn0003512	414.344	0.433403	0.118306	3.66342	0.000248873	0.00130684	3R	Sry-delta
FBgn0036991	262.317	-0.593072	0.161949	-3.66209	0.000250166	0.00131291	3L	CtIP
FBgn0003328	231.205	1.42952	0.390384	3.66184	0.000250413	0.00131291	2R	NA
FBgn0262127	894.234	0.843012	0.230208	3.66195	0.000250298	0.00131291	3R	kibra
FBgn0010409	28840.7	0.340875	0.0931011	3.66134	0.000250896	0.00131477	2R	RpL18A
FBgn0034647	28.8238	1.71036	0.467445	3.65896	0.000253237	0.00132636	2R	pirk
FBgn0265633	10.951	3.3529	0.916586	3.65803	0.000254157	0.0013305	4	lncRNA:CR44440
FBgn0028996	47.2437	1.48421	0.406	3.65569	0.000256491	0.00134203	4	onecut
FBgn0037405	12.6077	2.50371	0.685445	3.65267	0.000259523	0.0013572	3R	CG1077
FBgn0030274	748.591	-0.405307	0.110988	-3.6518	0.000260405	0.00136112	X	Lint-1
FBgn0051798	4.04605	4.93807	1.35257	3.65089	0.00026133	0.00136526	2L	CG31798
FBgn0019960	1841.41	-0.477893	0.130912	-3.65049	0.000261744	0.00136672	3R	Mitofilin
FBgn0033749	764.28	-0.51065	0.139942	-3.64901	0.000263253	0.0013739	2R	achi
FBgn0039419	1194.64	0.677797	0.185779	3.64841	0.000263871	0.00137572	3R	CG12290
FBgn0053267	54.1458	-1.43406	0.393058	-3.64846	0.00026382	0.00137572	3L	CG33267
FBgn0085229	844.863	-0.732027	0.200754	-3.64639	0.000265947	0.00138585	2R	CG34200
FBgn0040281	273.577	2.18151	0.598295	3.64621	0.00026614	0.00138614	3L	Aplip1
FBgn0265194	741.253	-0.635031	0.174182	-3.64579	0.000266572	0.00138769	2R	Trpm
FBgn0034918	182.682	0.559554	0.153493	3.64548	0.000266896	0.00138867	2R	Pym
FBgn0016983	1830.75	-0.425844	0.116839	-3.6447	0.0002677	0.00139215	3L	smid
FBgn0020278	3527.06	0.519685	0.142604	3.64424	0.000268182	0.00139324	3R	loco
FBgn0000566	3376.6	0.732688	0.201049	3.64432	0.000268097	0.00139324	2R	Eip55E
FBgn0015032	14.6953	7.04764	1.93493	3.64232	0.000270189	0.00140296	3R	Cyp4c3
FBgn0263112	652.037	0.527507	0.144848	3.64181	0.00027073	0.00140505	4	Mitf
FBgn0030660	346.692	0.460014	0.12632	3.64165	0.000270893	0.00140519	X	CG8097
FBgn0037632	3526	-0.393284	0.108028	-3.64058	0.000272021	0.00141033	3R	CCT7
FBgn0037832	7.76258	4.82013	1.32412	3.64025	0.00027237	0.00141142	3R	Desi
FBgn0038371	50.4028	1.04568	0.287321	3.6394	0.000273275	0.00141539	3R	Pbp45
FBgn0037554	410.605	-0.550027	0.151155	-3.63884	0.000273874	0.00141778	3R	DNApol-iota
FBgn0033929	1910.44	-0.43223	0.118794	-3.63847	0.000274261	0.00141907	2R	Tfb1
FBgn0029936	342.192	0.496216	0.136424	3.63731	0.000275502	0.00142477	X	CG4617
FBgn0034061	177.101	-0.66172	0.182069	-3.63444	0.000278585	0.00143999	2R	Ufc1
FBgn0261270	1144.71	-0.544514	0.149846	-3.63381	0.000279261	0.00144276	2R	SelD
FBgn0038376	1297.92	-0.640324	0.176258	-3.63287	0.000280282	0.0014473	3R	Hmt-1
FBgn0027864	133.473	0.935684	0.257615	3.6321	0.000281119	0.00145089	X	Ogg1
FBgn0015714	48.3519	-1.31628	0.362464	-3.63149	0.000281791	0.00145363	2R	Cyp6a17
FBgn0002878	579.309	-0.508826	0.140159	-3.63036	0.000283029	0.00145928	X	mus101
FBgn0052756	128.698	-0.952848	0.262514	-3.6297	0.000283746	0.00146172	X	CG32756
FBgn0032897	5.40597	4.90413	1.35113	3.62967	0.000283787	0.00146172	2L	CG9336
FBgn0037668	25.902	-1.63911	0.45177	-3.62819	0.00028541	0.00146934	3R	CG16736
FBgn0016984	889.585	-0.471912	0.130232	-3.62362	0.000290514	0.00149486	2R	sktl
FBgn0031091	1088.15	-0.380843	0.105131	-3.62257	0.000291695	0.00150019	X	Phf7
FBgn0069242	401.687	-0.47457	0.131079	-3.62049	0.000294043	0.0015115	3R	eca
FBgn0262719	38.4469	-1.32731	0.366856	-3.61808	0.000296799	0.00152491	3L	CG43163
FBgn0266696	2724.88	0.813685	0.22492	3.61767	0.000297271	0.00152657	3L	Svil
FBgn0028474	1091.43	-0.34548	0.0955153	-3.61701	0.000298028	0.00152903	X	CG4119
FBgn0052625	1144.1	-0.800216	0.221241	-3.61693	0.000298114	0.00152903	X	CG32625
FBgn0027537	2545.51	-0.421735	0.116602	-3.61686	0.000298197	0.00152903	X	Nup93-1
[truncated: 8,251 more rows]

## Sheet: res.DomB-Control
	baseMean	log2FoldChange	lfcSE	stat	pvalue	padj	chr	symbol
FBgn0033469	304.874	5.04051	0.416566	12.1001	1.05434e-33	1.0807e-29	2R	CG12133
FBgn0250819	116.794	4.1058	0.357513	11.4843	1.58137e-30	8.10453e-27	4	CG33521
FBgn0085484	198.929	-2.26184	0.204191	-11.0771	1.62074e-28	5.53752e-25	3L	Pdxk
FBgn0039129	955.575	1.96153	0.181013	10.8364	2.31303e-27	5.92715e-24	3R	RpS19b
FBgn0000826	171.562	-2.24841	0.229801	-9.78418	1.3166e-22	2.69904e-19	X	png
FBgn0000146	1675.08	-1.26697	0.130487	-9.70955	2.74555e-22	4.02027e-19	2L	aub
FBgn0036282	120.019	-3.21568	0.331178	-9.70982	2.73809e-22	4.02027e-19	3L	Smyd4-2
FBgn0032221	192.877	1.74172	0.180786	9.63413	5.73749e-22	7.35116e-19	2L	Schip1
FBgn0031360	406.661	-1.41033	0.147538	-9.55907	1.18823e-21	1.35327e-18	2L	CG31937
FBgn0002962	163.478	1.78816	0.188785	9.47194	2.74684e-21	2.81551e-18	3R	nos
FBgn0030647	142.499	2.50239	0.27108	9.23117	2.6769e-20	2.49438e-17	X	CG6324
FBgn0032449	72.8235	-2.75215	0.301132	-9.13936	6.28217e-20	5.36602e-17	2L	CG17036
FBgn0053138	1040.42	-1.23129	0.135222	-9.10573	8.5686e-20	6.75601e-17	2R	AGBE
FBgn0036191	476.241	-1.29718	0.143899	-9.01452	1.9773e-19	1.44766e-16	3L	Sugb
FBgn0045980	424.706	-1.9833	0.223009	-8.89338	5.92762e-19	4.05054e-16	3R	niki
FBgn0038828	50.3236	6.24756	0.704372	8.86968	7.33535e-19	4.69921e-16	3R	CG17270
FBgn0035847	150.879	1.59912	0.187221	8.54133	1.32684e-17	8.00007e-15	3L	mthl7
FBgn0010549	328.994	-2.50637	0.29598	-8.46801	2.49625e-17	1.42148e-14	2R	l(2)03659
FBgn0283442	44.7672	4.40261	0.52511	8.38417	5.10837e-17	2.75583e-14	2L	vas
FBgn0035151	138.192	-2.01138	0.240223	-8.37297	5.6186e-17	2.87953e-14	3L	CG17129
FBgn0052679	62.7617	3.04603	0.36415	8.36476	6.02382e-17	2.9402e-14	X	CG32679
FBgn0052432	237.942	1.34093	0.161667	8.29437	1.09163e-16	5.08601e-14	3L	CG32432
FBgn0003227	140.342	-1.63826	0.202052	-8.10813	5.14058e-16	2.29091e-13	3R	rec
FBgn0052476	272.414	1.29922	0.160941	8.07264	6.87927e-16	2.93802e-13	3L	mthl14
FBgn0010417	815.874	-0.821646	0.102142	-8.04416	8.68373e-16	3.56033e-13	3L	Taf6
FBgn0026176	272.761	1.85943	0.231738	8.02381	1.02511e-15	3.89161e-13	2R	SkpB
FBgn0030600	396.862	1.73706	0.216398	8.02717	9.97448e-16	3.89161e-13	X	hiw
FBgn0039827	534.969	-1.71924	0.214494	-8.01532	1.0985e-15	4.0213e-13	3R	CG1544
FBgn0029588	115.945	-1.83282	0.230853	-7.93932	2.0329e-15	6.94575e-13	X	CG14798
FBgn0041630	235.321	-2.01185	0.25333	-7.94161	1.99579e-15	6.94575e-13	3L	Hexo1
FBgn0035227	2229.71	-0.674011	0.0852116	-7.90985	2.57695e-15	8.52056e-13	3L	Iml1
FBgn0027528	164.054	2.92797	0.372221	7.86621	3.65542e-15	1.17088e-12	X	goe
FBgn0028408	55.1201	2.61039	0.332215	7.85753	3.91776e-15	1.21688e-12	2R	Drep2
FBgn0030662	211.608	-1.8053	0.233835	-7.72041	1.15955e-14	3.49571e-12	X	CG9220
FBgn0264478	32.7281	4.16742	0.545021	7.64636	2.06748e-14	6.05477e-12	3L	CG43886
FBgn0020908	66.2663	2.2391	0.29491	7.5925	3.13799e-14	8.93455e-12	2R	Scp1
FBgn0040322	162.646	-1.17355	0.155246	-7.55929	4.05266e-14	1.1227e-11	3L	GNBP2
FBgn0025383	47.0647	-2.42373	0.321726	-7.53352	4.93887e-14	1.3322e-11	X	CG14780
FBgn0028990	335.51	1.47085	0.196002	7.50426	6.17758e-14	1.62359e-11	2L	Spn27A
FBgn0023000	228.695	-1.68939	0.225663	-7.48633	7.08239e-14	1.81486e-11	3L	mth
FBgn0085384	1228.79	2.25166	0.30096	7.48159	7.34273e-14	1.83568e-11	3R	CG34355
FBgn0000557	326.23	1.57523	0.210761	7.47401	7.77854e-14	1.89833e-11	3R	eEF1alpha2
FBgn0030669	360.68	-0.949358	0.127525	-7.44446	9.7343e-14	2.32039e-11	X	CG9240
FBgn0034221	177.976	2.48101	0.334525	7.41651	1.20248e-13	2.80124e-11	2R	CG10764
FBgn0052207	372.381	-1.25426	0.16949	-7.40023	1.35946e-13	3.07436e-11	3L	hpRNA:CR32207
FBgn0035496	78.6297	3.48099	0.470514	7.39827	1.37971e-13	3.07436e-11	3L	CG14990
FBgn0022023	4192.08	-0.84222	0.114718	-7.34169	2.10921e-13	4.59988e-11	2L	eIF3h
FBgn0065032	124.328	2.25676	0.309478	7.29215	3.05043e-13	6.51394e-11	X	Arpc3B
FBgn0040351	57.1202	2.56568	0.352527	7.27796	3.38911e-13	7.08947e-11	X	CG11638
FBgn0041105	1216.08	1.61069	0.222324	7.24479	4.33107e-13	8.8787e-11	3R	nerfin-2
FBgn0029708	55.0004	4.3416	0.599544	7.2415	4.43734e-13	8.91818e-11	X	CG3556
FBgn0030747	587.505	1.40661	0.195766	7.18514	6.714e-13	1.32343e-10	X	CG4301
FBgn0037249	14340.1	-0.997224	0.138864	-7.18133	6.90386e-13	1.33518e-10	3R	eIF3a
FBgn0261086	113.493	1.8089	0.252165	7.17349	7.31097e-13	1.38773e-10	3R	Syt14
FBgn0031910	145.39	5.77745	0.806052	7.16759	7.63317e-13	1.42255e-10	2L	CG15818
FBgn0034219	455.814	1.29706	0.181056	7.16387	7.84285e-13	1.43552e-10	2R	mthl4
FBgn0032138	6615.11	-0.875854	0.122852	-7.12936	1.00836e-12	1.81328e-10	2L	CG4364
FBgn0025641	501.2	2.02011	0.283806	7.11791	1.09577e-12	1.9365e-10	X	DAAM
FBgn0000108	397.867	-2.57473	0.363069	-7.09158	1.32586e-12	2.26501e-10	X	Appl
FBgn0023531	734.148	-0.788805	0.111223	-7.09207	1.32121e-12	2.26501e-10	X	CG32809
FBgn0039690	108.549	-1.43818	0.203225	-7.07676	1.47568e-12	2.47962e-10	3R	Gnpnat
FBgn0050345	72.822	-1.77601	0.251186	-7.07049	1.54382e-12	2.55229e-10	2R	CG30345
FBgn0039580	1099.65	-0.743961	0.105605	-7.04476	1.85777e-12	3.02256e-10	3R	Gfat2
FBgn0037921	276.394	1.11726	0.158701	7.04003	1.92195e-12	3.07812e-10	3R	CG6808
FBgn0037850	835.73	1.30962	0.186323	7.02878	2.08344e-12	3.28543e-10	3R	CG14695
FBgn0025640	704.597	-0.86789	0.123666	-7.018	2.25065e-12	3.49533e-10	X	CG13369
FBgn0030040	2231.59	2.43076	0.346694	7.01126	2.3619e-12	3.61335e-10	X	CG15347
FBgn0036551	83.5391	2.41098	0.345569	6.97683	3.01907e-12	4.55081e-10	3L	CG17029
FBgn0037723	347.975	1.4514	0.208473	6.96205	3.35364e-12	4.98185e-10	3R	SpdS
FBgn0033872	104.967	-1.96241	0.282691	-6.9419	3.86872e-12	5.66491e-10	2R	CG6329
FBgn0028473	17761.4	-0.867115	0.125432	-6.91301	4.74469e-12	6.76395e-10	2R	Non1
FBgn0000346	718.167	0.928334	0.134292	6.91282	4.75126e-12	6.76395e-10	X	comt
FBgn0014092	272.719	-0.915644	0.132601	-6.90524	5.01201e-12	7.03742e-10	2L	CG4278
FBgn0027791	425.705	-1.23529	0.179415	-6.88511	5.77431e-12	7.9982e-10	X	O-fut2
FBgn0038832	156.691	3.66778	0.535958	6.8434	7.73351e-12	1.05691e-09	3R	CG15695
FBgn0004635	948.696	2.03096	0.298065	6.81382	9.50435e-12	1.28184e-09	3L	rho
FBgn0051522	531.974	-0.942389	0.138552	-6.8017	1.03394e-11	1.37634e-09	3R	CG31522
FBgn0038243	69.5302	2.96198	0.437024	6.77761	1.22178e-11	1.60554e-09	3R	CG8066
FBgn0030968	70.8323	-1.96369	0.290563	-6.75821	1.39706e-11	1.81264e-09	X	CG7322
FBgn0032520	1559.48	0.731814	0.108816	6.72525	1.75296e-11	2.24597e-09	2L	CG10859
FBgn0030700	116.478	-1.2852	0.191177	-6.72257	1.78545e-11	2.25937e-09	X	CG15914
FBgn0023537	2721.89	-0.898801	0.134555	-6.67981	2.39251e-11	2.99064e-09	X	CG17896
FBgn0040336	311.834	1.09393	0.163871	6.67554	2.46317e-11	3.04186e-09	X	Seipin
FBgn0031245	171.43	-1.65639	0.248492	-6.66577	2.63283e-11	3.21268e-09	2L	CG3625
FBgn0029754	33.8095	2.89936	0.43594	6.65083	2.91451e-11	3.51456e-09	X	CG15930
FBgn0038596	28.1575	4.10811	0.622333	6.60114	4.07999e-11	4.86278e-09	3R	CG14312
FBgn0036258	4207.07	-0.871378	0.132048	-6.59897	4.14025e-11	4.87788e-09	3L	eIF3l
FBgn0034139	328.795	2.19749	0.333159	6.59593	4.22594e-11	4.92225e-09	2R	CG4927
FBgn0036330	78.5567	1.85645	0.282936	6.56139	5.33098e-11	6.13962e-09	3L	CG11263
FBgn0029930	69.4758	3.14529	0.480179	6.55025	5.74414e-11	6.54193e-09	X	CG12541
FBgn0033274	274.879	0.851047	0.130837	6.50462	7.78883e-11	8.77313e-09	2R	CG14757
FBgn0033987	176.033	2.03059	0.312642	6.49493	8.30719e-11	9.2553e-09	2R	ckn
FBgn0038038	158.606	-1.41434	0.217958	-6.48907	8.63694e-11	9.51921e-09	3R	Sccpdh2
FBgn0038575	55.6028	1.72416	0.265819	6.48621	8.80221e-11	9.57683e-09	3R	CG7208
FBgn0035082	375.624	-0.833602	0.128544	-6.48495	8.87608e-11	9.57683e-09	2R	CG2811
FBgn0037482	1278.2	1.14606	0.177165	6.46887	9.87359e-11	1.05421e-08	3R	CG10055
FBgn0032724	495.361	-0.910466	0.140844	-6.46438	1.01718e-10	1.07485e-08	2L	CG10428
FBgn0266854	23.0871	3.37593	0.522774	6.45772	1.06294e-10	1.11175e-08	2R	CR45315
FBgn0037270	4586.22	-0.695815	0.108197	-6.43098	1.26781e-10	1.31263e-08	3R	eIF3f1
FBgn0027550	474.517	-2.26691	0.352955	-6.42266	1.33914e-10	1.37262e-08	2L	CG6495
FBgn0020910	41593.3	-1.00443	0.157269	-6.38667	1.69539e-10	1.72057e-08	3R	RpL3
FBgn0266418	283.531	1.14822	0.180272	6.36941	1.89762e-10	1.90692e-08	3R	wake
FBgn0029970	93.6362	-1.79218	0.281672	-6.36263	1.98322e-10	1.97359e-08	X	Nek2
FBgn0034035	349.035	-0.849655	0.133661	-6.35679	2.06009e-10	2.03038e-08	2R	CG8207
FBgn0030716	128.361	-1.83576	0.289551	-6.34002	2.2973e-10	2.2426e-08	X	CG9170
FBgn0035298	800.275	-0.824158	0.130446	-6.31802	2.64938e-10	2.5619e-08	3L	SCOT
FBgn0053516	328.939	2.23177	0.353677	6.31019	2.7869e-10	2.65982e-08	2L	dpr3
FBgn0085431	173.089	1.88387	0.298585	6.30933	2.80254e-10	2.65982e-08	3R	CG34402
FBgn0266732	32.9525	3.10083	0.492237	6.29947	2.98671e-10	2.8086e-08	3R	asRNA:CR45205
FBgn0052557	66.2852	2.46507	0.392774	6.27606	3.47267e-10	3.2359e-08	X	Mco4
FBgn0027525	3250.37	-0.683276	0.109002	-6.2685	3.64548e-10	3.36632e-08	2R	LTV1
FBgn0030974	1085.66	-0.62914	0.100681	-6.24882	4.13559e-10	3.78481e-08	X	Flacc
FBgn0027521	66.8175	-1.79064	0.28728	-6.2331	4.57302e-10	4.14809e-08	X	CG3679
FBgn0030362	663.885	1.34611	0.216028	6.23117	4.62976e-10	4.16272e-08	X	regucalcin
FBgn0013323	143.797	-1.87112	0.300634	-6.22391	4.84901e-10	4.31789e-08	2L	Ptth
FBgn0020372	902.063	1.53603	0.246843	6.2227	4.88658e-10	4.31789e-08	2R	TM4SF
FBgn0000326	272.071	-1.17975	0.189709	-6.21874	5.01164e-10	4.39054e-08	2R	clt
FBgn0037000	65.8491	1.90477	0.306659	6.21134	5.25341e-10	4.56334e-08	3L	ZnT77C
FBgn0013679	6736.58	1.49639	0.241117	6.20607	5.43274e-10	4.67946e-08	mitochondrion_genome	ND1
FBgn0025582	5414.46	-0.694592	0.111951	-6.20441	5.49041e-10	4.68972e-08	3L	eIF3e
FBgn0037759	622.327	0.902411	0.145724	6.19262	5.91708e-10	5.0124e-08	3R	CG8526
FBgn0004867	21702.4	-0.617237	0.100045	-6.16958	6.84708e-10	5.7059e-08	2L	RpS2
FBgn0063670	1388.48	1.02596	0.16629	6.16968	6.84283e-10	5.7059e-08	3L	CG40228
FBgn0031821	115.579	1.2127	0.196922	6.15827	7.35461e-10	6.07941e-08	2L	KFase
FBgn0038679	111.465	2.2162	0.359999	6.15614	7.45404e-10	6.11231e-08	3R	CG6040
FBgn0050372	1011.15	-0.504869	0.0822185	-6.14058	8.22231e-10	6.68878e-08	2R	Asap
FBgn0014032	42.0229	-2.42054	0.394423	-6.13693	8.41317e-10	6.79015e-08	X	Sptr
FBgn0032787	344.27	-0.864373	0.141082	-6.12675	8.96932e-10	7.13133e-08	2L	CG10195
FBgn0036134	1580.93	-0.598728	0.0977252	-6.12665	8.97504e-10	7.13133e-08	3L	FoxK
FBgn0034258	8373.3	-0.845323	0.138073	-6.12227	9.22502e-10	7.27357e-08	2R	eIF3c
FBgn0038917	75.3049	-1.46964	0.240096	-6.12103	9.29701e-10	7.27438e-08	3R	CG6678
FBgn0261387	2651.28	1.06651	0.174466	6.113	9.77784e-10	7.59264e-08	2R	CG17528
FBgn0250906	2479.53	-0.649253	0.10633	-6.10602	1.02144e-09	7.87198e-08	2L	Pgk
FBgn0031389	3237.85	2.15796	0.353717	6.1008	1.05537e-09	8.07279e-08	2L	CG4259
FBgn0027080	1201.33	-0.637504	0.104532	-6.09863	1.06982e-09	8.12273e-08	3L	TyrRS
FBgn0033928	2144.37	1.03185	0.171479	6.01733	1.77322e-09	1.33643e-07	2R	Arc2
FBgn0031313	824.735	-1.68797	0.281594	-5.99433	2.04332e-09	1.52876e-07	2L	CG5080
FBgn0053654	95.8025	1.65693	0.276696	5.98827	2.1208e-09	1.55273e-07	3R	CG33654
FBgn0034951	170.206	-0.938816	0.156734	-5.98986	2.10026e-09	1.55273e-07	2R	CG3860
FBgn0035770	1746.77	0.643662	0.107474	5.98901	2.11117e-09	1.55273e-07	3L	pst
FBgn0031184	370.709	-1.26841	0.211881	-5.98645	2.14476e-09	1.55913e-07	X	CG14615
FBgn0051272	356.555	2.59764	0.436828	5.9466	2.73777e-09	1.97621e-07	3R	CG31272
FBgn0004359	53.4162	1.66632	0.280466	5.94125	2.82856e-09	2.02746e-07	3R	T48
FBgn0037536	1180.52	-0.799796	0.135116	-5.91932	3.23268e-09	2.215e-07	3R	CG2698
FBgn0037721	36.9758	3.16323	0.534165	5.92183	3.18386e-09	2.215e-07	3R	CG9427
FBgn0037897	791.293	-1.2545	0.211861	-5.92135	3.19301e-09	2.215e-07	3R	CG5270
FBgn0038330	225.509	-1.17913	0.199214	-5.91888	3.24147e-09	2.215e-07	3R	CG14868
FBgn0040602	1630.6	0.94452	0.159437	5.92409	3.1403e-09	2.215e-07	3R	CG14545
FBgn0266253	26.496	4.84668	0.818684	5.92008	3.21786e-09	2.215e-07	3R	lncRNA:CR44948
FBgn0266347	132.877	1.21236	0.204756	5.92098	3.20033e-09	2.215e-07	3L	nAChRalpha4
FBgn0033381	519.373	-0.943524	0.159481	-5.91623	3.29406e-09	2.23603e-07	2R	GstE13
FBgn0033902	6960.34	-0.75782	0.128131	-5.91443	3.33033e-09	2.24578e-07	2R	eIF3m
FBgn0263873	672.657	1.17373	0.198641	5.90879	3.44636e-09	2.30884e-07	2L	sick
FBgn0264975	1182.59	2.15161	0.364317	5.90587	3.50786e-09	2.33478e-07	X	Nrg
FBgn0266873	36.5262	2.82364	0.478917	5.89589	3.72675e-09	2.46447e-07	2L	lncRNA:CR45334
FBgn0037345	815.736	1.71953	0.291928	5.89027	3.85565e-09	2.53336e-07	3R	rev7
FBgn0051472	235.408	1.31256	0.223183	5.88112	4.07498e-09	2.66042e-07	3R	sgll
FBgn0028970	239.838	-0.912622	0.155608	-5.86489	4.49443e-09	2.91569e-07	2L	betaggt-II
FBgn0050499	640.569	-0.790789	0.135215	-5.84841	4.96307e-09	3.195e-07	2R	Rpe
FBgn0264617	91.6926	1.89343	0.323796	5.84759	4.98732e-09	3.195e-07	4	asRNA:CR43957
FBgn0040334	288.053	-1.05577	0.180691	-5.84298	5.12762e-09	3.26448e-07	X	Tsp3A
FBgn0052268	24.9796	4.43247	0.760496	5.82839	5.59634e-09	3.54089e-07	3L	Drsl6
FBgn0040060	17.3098	3.42271	0.588318	5.81779	5.96301e-09	3.74974e-07	3L	yip7
FBgn0263967	114.043	-1.43839	0.248025	-5.79939	6.65559e-09	4.15975e-07	2R	asRNA:CR43723
FBgn0039622	133.221	1.13595	0.195954	5.79703	6.75011e-09	4.16799e-07	3R	eIF4E6
FBgn0035083	1878.16	-0.99977	0.172434	-5.79798	6.71171e-09	4.16799e-07	2R	Tina-1
FBgn0034988	424.936	-1.1863	0.204968	-5.78774	7.13403e-09	4.35261e-07	2R	cN-IIIB
FBgn0031318	2221.05	-0.899591	0.155426	-5.78791	7.12662e-09	4.35261e-07	2L	CG4887
FBgn0039006	903.631	1.15609	0.199848	5.78487	7.25696e-09	4.40141e-07	3R	Cyp6d4
FBgn0004885	73.7719	1.95085	0.338986	5.75498	8.66531e-09	5.22467e-07	3R	tok
FBgn0029123	103.301	1.67691	0.292806	5.72704	1.02197e-08	6.12584e-07	2L	SoxN
FBgn0283510	386.244	-0.715443	0.124959	-5.72543	1.03171e-08	6.14828e-07	2R	Pal1
FBgn0025630	400.448	-1.1358	0.198785	-5.71371	1.10537e-08	6.5115e-07	X	Rtca
FBgn0010772	843.759	-0.600671	0.105122	-5.71401	1.10343e-08	6.5115e-07	3R	Xe7
FBgn0004872	306.645	2.54456	0.445682	5.70937	1.13398e-08	6.64189e-07	2L	piwi
FBgn0031384	67.6783	1.3358	0.234306	5.70109	1.19044e-08	6.93297e-07	2L	CG4238
FBgn0020407	182.651	-1.02586	0.180606	-5.6801	1.34615e-08	7.7955e-07	3R	asun
FBgn0038735	317.946	-1.00393	0.176795	-5.6785	1.35879e-08	7.82451e-07	3R	CG4662
FBgn0037135	4659.83	-0.5623	0.09917	-5.67006	1.42747e-08	8.17407e-07	3L	CG7414
FBgn0002566	3296.25	0.939944	0.166451	5.64698	1.63291e-08	9.29853e-07	2L	lt
FBgn0040281	273.577	3.3598	0.596601	5.63157	1.78579e-08	1.01129e-06	3L	Aplip1
FBgn0036213	27033.2	-0.709984	0.126237	-5.62423	1.86342e-08	1.04945e-06	3L	RpL10Ab
FBgn0035311	155.601	1.60421	0.285889	5.6113	2.00815e-08	1.12478e-06	3L	CR15821
FBgn0001565	3275.57	-0.664956	0.118553	-5.60894	2.03568e-08	1.134e-06	X	Hlc
FBgn0037974	621.492	2.00927	0.360771	5.56938	2.55647e-08	1.41642e-06	3R	CG12224
FBgn0004507	1832.1	-0.696706	0.125118	-5.56838	2.5712e-08	1.41692e-06	2L	GlyP
FBgn0039674	370.082	-0.731346	0.13165	-5.55522	2.77262e-08	1.51975e-06	3R	CG1907
FBgn0035623	289.55	4.54582	0.819118	5.54965	2.86249e-08	1.56066e-06	3L	mthl2
FBgn0036691	416.378	-0.717431	0.129322	-5.54764	2.89552e-08	1.57032e-06	3L	beg
FBgn0035099	991.385	-0.617631	0.111708	-5.52899	3.22075e-08	1.73751e-06	3L	CG6845
FBgn0031816	188.419	1.17019	0.211836	5.52403	3.31318e-08	1.77802e-06	2L	Rchy1
FBgn0017482	140.377	-1.23406	0.223524	-5.52092	3.37234e-08	1.80034e-06	2R	T3dh
FBgn0000053	608.621	-1.28382	0.232606	-5.51928	3.40388e-08	1.80262e-06	2L	Gart
FBgn0261277	27.7114	3.13665	0.56835	5.51887	3.41179e-08	1.80262e-06	X	rtv
FBgn0000644	47.9767	1.69694	0.307543	5.51773	3.43407e-08	1.80509e-06	X	Fcp3C
FBgn0260794	12901.5	0.598662	0.108633	5.51089	3.57025e-08	1.86399e-06	3R	ctrip
FBgn0263772	28.1854	2.22579	0.403937	5.51025	3.58329e-08	1.86399e-06	X	CG43689
FBgn0031451	94.2576	1.52798	0.277341	5.5094	3.60068e-08	1.86399e-06	2L	CG9961
FBgn0027786	1074.47	-0.86188	0.156562	-5.50503	3.69109e-08	1.90119e-06	3L	Mtch
FBgn0028468	925.182	-0.773625	0.140616	-5.50166	3.76222e-08	1.92814e-06	3R	rtet
FBgn0027579	1009.44	-0.50446	0.091765	-5.4973	3.85651e-08	1.96663e-06	3R	mino
FBgn0034928	57.3686	-2.12791	0.387398	-5.49282	3.95559e-08	2.00717e-06	2R	CG13562
FBgn0045761	1558.97	0.697876	0.127421	5.47693	4.32772e-08	2.18518e-06	3R	CHKov1
FBgn0032375	170.124	0.870256	0.159026	5.47241	4.4395e-08	2.23063e-06	2L	CG14932
FBgn0034816	92.0791	-1.55618	0.284714	-5.46577	4.60899e-08	2.30449e-06	2R	CG3085
FBgn0011638	6494.43	1.08004	0.198085	5.45242	4.96877e-08	2.47233e-06	2L	La
FBgn0033033	359.699	1.57718	0.289723	5.44376	5.21678e-08	2.58319e-06	2R	scaf
FBgn0003733	70.142	2.12345	0.390594	5.43647	5.43456e-08	2.67809e-06	2R	tor
FBgn0036984	1062.92	-1.02248	0.188306	-5.42988	5.63933e-08	2.7657e-06	3L	CG13248
FBgn0053465	222.765	3.12179	0.575109	5.42817	5.69342e-08	2.77893e-06	2R	CG33465
FBgn0016126	1080.37	0.918482	0.169263	5.42638	5.7509e-08	2.79369e-06	4	CaMKI
FBgn0035132	134.855	-1.33693	0.246582	-5.42183	5.89936e-08	2.85228e-06	3L	mthl10
FBgn0037296	219.066	1.31656	0.242975	5.41851	6.0099e-08	2.89209e-06	3R	Prosbeta2R2
FBgn0032162	90.4186	-1.34888	0.249625	-5.40361	6.53113e-08	3.12823e-06	2L	CG4592
FBgn0039751	229.723	-0.815012	0.150904	-5.40086	6.63208e-08	3.1618e-06	3R	CG1983
FBgn0033183	1826.11	-0.56865	0.105414	-5.39442	6.87445e-08	3.26218e-06	2R	CG1620
FBgn0035767	229.415	-1.08394	0.20151	-5.37909	7.48616e-08	3.53609e-06	3L	Cln7
FBgn0034184	1511.08	0.779275	0.145061	5.37205	7.7847e-08	3.66024e-06	2R	CG9646
FBgn0038055	335.831	0.673536	0.125464	5.36835	7.94597e-08	3.7021e-06	3R	trus
FBgn0062928	541.517	-1.06057	0.197557	-5.36842	7.94305e-08	3.7021e-06	3L	hpRNA:CR33940
FBgn0051279	133.416	2.85818	0.53261	5.36636	8.03432e-08	3.72633e-06	3R	CG31279
FBgn0040670	34.5727	2.14774	0.400365	5.36445	8.11954e-08	3.74889e-06	3R	e(y)2b
FBgn0020618	25472.8	-0.906333	0.169127	-5.35889	8.3735e-08	3.84881e-06	2L	Rack1
FBgn0030742	49.7181	-1.79815	0.336549	-5.34292	9.14602e-08	4.18512e-06	X	CG9919
FBgn0000246	1153.17	1.41159	0.264274	5.34141	9.22282e-08	4.20151e-06	3R	c(3)G
FBgn0033919	253.182	-1.07521	0.201518	-5.33555	9.52528e-08	4.29068e-06	2R	CG8547
FBgn0265375	77.7624	2.39462	0.448835	5.3352	9.54415e-08	4.29068e-06	2R	lncRNA:CR44316
FBgn0031547	176.506	2.58891	0.48513	5.33652	9.47452e-08	4.29068e-06	2L	Sr-CIV
FBgn0028540	48.9824	1.88735	0.353979	5.33181	9.72376e-08	4.35234e-06	2L	CG9008
FBgn0034365	103.93	-1.37376	0.258202	-5.32049	1.03488e-07	4.61196e-06	2R	CG5335
FBgn0260795	1544.81	1.29444	0.243357	5.3191	1.04283e-07	4.62725e-06	3L	NaPi-III
FBgn0042110	61.3512	2.38915	0.44971	5.31264	1.0805e-07	4.77377e-06	3R	CG18765
FBgn0029672	275.205	1.05976	0.199516	5.31164	1.08642e-07	4.77934e-06	X	CG2875
FBgn0263240	522.371	-0.745177	0.140433	-5.3063	1.11874e-07	4.90046e-06	2R	Coop
FBgn0015288	7981.82	-1.00422	0.189304	-5.30481	1.12789e-07	4.91953e-06	X	RpL22
FBgn0004431	103.962	2.541	0.479071	5.304	1.13291e-07	4.92047e-06	3L	LysX
FBgn0039358	1517.4	-0.83044	0.157396	-5.27611	1.31957e-07	5.70412e-06	3R	CG5028
FBgn0033079	571.611	-0.852847	0.161664	-5.27543	1.32447e-07	5.70412e-06	2R	Fmo-2
FBgn0262954	1656.9	0.926616	0.175921	5.26723	1.38495e-07	5.93966e-06	2R	Rpb12
FBgn0010317	380.813	0.959954	0.182353	5.26426	1.40759e-07	6.01157e-06	3L	CycJ
FBgn0013681	2064.9	1.29215	0.245685	5.25939	1.44536e-07	6.14727e-06	mitochondrion_genome	ND3
FBgn0039630	20.4657	-3.88636	0.740656	-5.24718	1.54441e-07	6.54142e-06	3R	CG11843
FBgn0039640	354.801	1.9687	0.375365	5.24477	1.56479e-07	6.60044e-06	3R	CG14516
FBgn0019890	3954.83	-0.650462	0.124048	-5.24364	1.57439e-07	6.61372e-06	2L	Smg5
FBgn0267084	19.4841	-2.06888	0.39515	-5.23568	1.64382e-07	6.87719e-06	X	asRNA:CR45528
FBgn0003076	2410.14	-1.12048	0.214336	-5.22768	1.71654e-07	7.15225e-06	3L	Pgm1
FBgn0263111	225.368	-1.16998	0.223847	-5.22669	1.72576e-07	7.16154e-06	X	cac
FBgn0039249	219.772	-0.926529	0.177383	-5.22332	1.75746e-07	7.26369e-06	3R	CG11168
FBgn0004859	162.86	1.86219	0.357144	5.21412	1.84694e-07	7.60285e-06	4	ci
FBgn0037664	22.6089	2.75718	0.52912	5.21088	1.87943e-07	7.70565e-06	3R	CG8420
FBgn0031244	299.296	-0.727535	0.139809	-5.20377	1.95281e-07	7.97462e-06	2L	CG11601
FBgn0037849	54.2191	2.07238	0.3985	5.20047	1.9879e-07	8.0857e-06	3R	CG4596
FBgn0030746	253.237	1.54418	0.296976	5.19968	1.99627e-07	8.08765e-06	X	CG9981
FBgn0032700	386.685	-0.789752	0.15203	-5.1947	2.05045e-07	8.27445e-06	2L	CG10338
FBgn0035951	942.893	0.570629	0.110028	5.18622	2.14603e-07	8.62621e-06	3L	CG5068
FBgn0267252	59.2803	2.48109	0.478639	5.18365	2.1759e-07	8.71212e-06	2L	Ggamma30A
FBgn0028746	185.928	0.787784	0.152106	5.17919	2.22854e-07	8.88816e-06	X	CG18508
FBgn0035084	121.91	-1.10852	0.21459	-5.16576	2.39463e-07	9.51356e-06	2R	CG15861
FBgn0053460	554.794	2.23039	0.432488	5.15711	2.50796e-07	9.92531e-06	2R	CG33460
FBgn0028996	47.2437	2.05308	0.398529	5.15163	2.5823e-07	1.01802e-05	4	onecut
FBgn0053107	446.941	1.22979	0.239028	5.14497	2.67568e-07	1.05079e-05	3R	CG33107
FBgn0036749	143.463	1.80054	0.350152	5.14218	2.71567e-07	1.06243e-05	3L	CG7460
FBgn0026428	298.877	-0.873804	0.170241	-5.13276	2.85528e-07	1.1128e-05	X	HDAC6
FBgn0033926	36599.6	0.656324	0.12833	5.11434	3.14835e-07	1.22237e-05	2R	Arc1
FBgn0033020	93.0048	1.71231	0.33487	5.11335	3.16493e-07	1.22417e-05	2R	COX4L
FBgn0051352	322.356	-0.954497	0.186744	-5.11126	3.20013e-07	1.23313e-05	3R	Unc-115a
FBgn0031645	127.607	1.48673	0.291273	5.10427	3.32072e-07	1.27354e-05	2L	CG3036
FBgn0261547	1637.96	1.20035	0.235225	5.10299	3.34336e-07	1.27354e-05	3L	Exn
FBgn0034800	204.561	-1.34166	0.262949	-5.10235	3.35469e-07	1.27354e-05	2R	CG3788
FBgn0035996	457.035	1.56347	0.306352	5.1035	3.33427e-07	1.27354e-05	3L	CG3448
FBgn0040208	974.791	-0.575461	0.112844	-5.09961	3.40362e-07	1.28353e-05	3R	Kat60
FBgn0032452	362.908	0.878072	0.17219	5.09945	3.40638e-07	1.28353e-05	2L	CG15484
FBgn0028979	186.382	1.44564	0.283527	5.09878	3.41858e-07	1.28353e-05	2L	tio
FBgn0026718	208.429	-1.78474	0.350426	-5.09307	3.5232e-07	1.31799e-05	2L	Agpat2
FBgn0035871	2714.48	1.17847	0.231485	5.09089	3.56387e-07	1.32835e-05	3L	BI-1
FBgn0029778	911.398	-0.558987	0.109916	-5.08558	3.66496e-07	1.36108e-05	X	RhoGAP5A
FBgn0033434	942.331	-0.577764	0.113792	-5.07739	3.82657e-07	1.41597e-05	2R	CG1902
FBgn0000139	535.658	-0.610519	0.120481	-5.06735	4.0339e-07	1.48732e-05	3R	ash2
FBgn0050046	1544.92	1.38608	0.273788	5.06261	4.13559e-07	1.51935e-05	2R	CG30046
FBgn0032136	622.086	3.86539	0.763658	5.06168	4.1557e-07	1.52128e-05	2L	Apoltp
FBgn0031115	1121.64	0.709923	0.140435	5.05518	4.29988e-07	1.56845e-05	X	CG11710
FBgn0069923	790.112	0.757129	0.149793	5.0545	4.31514e-07	1.56845e-05	3R	CG41128
FBgn0036437	246.298	1.46748	0.290847	5.04553	4.52265e-07	1.63806e-05	3L	CG5048
FBgn0037581	151.142	-1.07095	0.212287	-5.0448	4.54002e-07	1.63856e-05	3R	CG7352
FBgn0000339	854.411	-0.533478	0.105763	-5.04409	4.55673e-07	1.63883e-05	2L	cni
FBgn0020300	28.0543	2.67903	0.531384	5.0416	4.61645e-07	1.6545e-05	3L	geko
FBgn0040010	639.643	0.868556	0.173053	5.01903	5.19338e-07	1.85478e-05	2L	CG17493
FBgn0040524	226.29	0.974616	0.194271	5.01677	5.25463e-07	1.87014e-05	3R	CG11052
FBgn0014949	35.1574	1.6738	0.333692	5.01599	5.27597e-07	1.87124e-05	3R	btn
FBgn0032922	142.284	-0.877384	0.175235	-5.00689	5.53168e-07	1.95516e-05	2L	Coq3
FBgn0022153	308.155	-0.684223	0.136828	-5.00062	5.71472e-07	2.01292e-05	2L	l(2)k05819
FBgn0015778	10134.3	-0.540157	0.108119	-4.99596	5.85426e-07	2.055e-05	3R	rin
FBgn0000036	1213.77	1.1479	0.23014	4.98783	6.106e-07	2.13606e-05	3R	nAChRalpha1
FBgn0035383	542.526	-0.7688	0.154325	-4.98169	6.30306e-07	2.19749e-05	3L	CPT2
FBgn0024841	272.156	-1.15721	0.23235	-4.98047	6.34287e-07	2.2003e-05	3R	Pcd
FBgn0004852	49.0421	2.03521	0.408666	4.98013	6.35405e-07	2.2003e-05	3L	Ac76E
FBgn0032597	1257.81	0.63407	0.127405	4.97681	6.46417e-07	2.20098e-05	2L	CG17904
FBgn0002868	1400.91	-1.88276	0.378284	-4.9771	6.45428e-07	2.20098e-05	3R	MtnA
FBgn0033725	275.979	1.36271	0.273793	4.97714	6.4532e-07	2.20098e-05	2R	Cpr49Ac
FBgn0033388	1127.77	1.29811	0.260858	4.9763	6.48128e-07	2.20098e-05	2R	CG8046
FBgn0035024	1192.54	-0.466166	0.0936794	-4.97619	6.48483e-07	2.20098e-05	2R	CG11414
FBgn0031020	3338.49	-0.435498	0.0874933	-4.9775	6.44107e-07	2.20098e-05	X	Naa15-16
FBgn0038815	311.496	-0.882885	0.177576	-4.97187	6.63092e-07	2.24313e-05	3R	CG5466
FBgn0033929	1910.44	-0.589283	0.118669	-4.96576	6.84308e-07	2.30729e-05	2R	Tfb1
FBgn0035245	207.611	-1.33692	0.269631	-4.95834	7.10995e-07	2.3816e-05	3L	GC
FBgn0030364	1374.79	-0.698917	0.140958	-4.95834	7.10965e-07	2.3816e-05	X	Lsm12
FBgn0035888	69.4848	-1.9242	0.389063	-4.94573	7.58581e-07	2.53272e-05	3L	CG7120
FBgn0002905	644.403	-0.724754	0.146834	-4.93587	7.97936e-07	2.64299e-05	3R	mus308
FBgn0014427	82.4051	-1.39158	0.281952	-4.93553	7.99344e-07	2.64299e-05	3R	CG11899
FBgn0039737	2346.66	-0.576887	0.11686	-4.93657	7.95096e-07	2.64299e-05	3R	CG7920
FBgn0266669	745.566	-0.69104	0.140072	-4.93345	8.07907e-07	2.66272e-05	3L	Sec3
FBgn0069969	152.403	1.06833	0.216609	4.93206	8.13653e-07	2.67306e-05	2R	CG40498
FBgn0027835	9027.87	-0.704578	0.142992	-4.9274	8.33292e-07	2.71151e-05	2R	Dp1
FBgn0260482	13.0184	2.99331	0.607412	4.92796	8.30917e-07	2.71151e-05	X	CG32599
FBgn0030311	312.772	-0.688221	0.139666	-4.92763	8.32351e-07	2.71151e-05	X	CG11699
FBgn0036487	2055.62	0.891321	0.180978	4.92503	8.43462e-07	2.73591e-05	3L	Prp31
FBgn0030847	33.954	2.6629	0.541999	4.9131	8.9646e-07	2.89865e-05	X	CG12991
FBgn0023083	1077.11	0.692592	0.141006	4.91177	9.02574e-07	2.90924e-05	3R	fray
FBgn0264437	2390.11	2.75217	0.560554	4.90973	9.12027e-07	2.9305e-05	2L	lncRNA:CR43855
FBgn0052017	96.5791	2.65899	0.541652	4.90904	9.15212e-07	2.93154e-05	4	CG32017
FBgn0052533	433.504	-0.616086	0.125554	-4.90695	9.25018e-07	2.95372e-05	X	CG32533
FBgn0036985	54.0581	1.79709	0.366292	4.90616	9.28762e-07	2.95646e-05	3L	zye
FBgn0033446	151.33	2.1256	0.433663	4.9015	9.5106e-07	3.01807e-05	2R	CG1648
FBgn0026375	1266.53	-0.44727	0.091362	-4.89558	9.80184e-07	3.10089e-05	X	RhoGAPp190
FBgn0020389	184.55	-0.881339	0.180052	-4.89492	9.83447e-07	3.10164e-05	3L	Papss
FBgn0030653	136.402	-1.2153	0.248345	-4.89361	9.9005e-07	3.11289e-05	X	CG7860
FBgn0029095	2746.21	0.948878	0.193969	4.89191	9.98644e-07	3.13031e-05	2L	aru
FBgn0053653	429.804	1.66671	0.341046	4.88705	1.02356e-06	3.19864e-05	4	Cadps
FBgn0041627	1608.43	0.720247	0.147445	4.88484	1.03511e-06	3.20539e-05	2L	Ku80
FBgn0039844	110.217	1.42901	0.292484	4.88578	1.0302e-06	3.20539e-05	3R	CG1607
FBgn0264343	628.363	4.13791	0.846997	4.8854	1.03221e-06	3.20539e-05	2L	CG43799
FBgn0036942	24.4468	-2.15261	0.440738	-4.8841	1.03902e-06	3.20782e-05	3L	CG7328
FBgn0031483	663.938	-0.554091	0.11348	-4.88273	1.04629e-06	3.22055e-05	2L	CG9641
FBgn0003517	28870.9	-0.725331	0.148584	-4.88162	1.0522e-06	3.22906e-05	X	sta
FBgn0033980	382.758	1.61556	0.331134	4.87888	1.06691e-06	3.26444e-05	2R	Cyp6a20
FBgn0264561	2355	-0.837896	0.171913	-4.87395	1.09386e-06	3.33694e-05	3L	Glg1
FBgn0034850	38.0214	2.49649	0.513365	4.863	1.15621e-06	3.51667e-05	2R	CG9875
FBgn0028525	16.1179	2.6282	0.541613	4.85254	1.21892e-06	3.69643e-05	2L	c(2)M
FBgn0024984	7.10992	-4.55995	0.940435	-4.84876	1.24233e-06	3.75631e-05	X	CG3457
FBgn0039689	232.988	-0.884341	0.182482	-4.84618	1.25864e-06	3.79443e-05	3R	CIA30
FBgn0263344	30.7349	1.8674	0.385944	4.83852	1.30812e-06	3.93203e-05	4	asRNA:CR43425
FBgn0035233	198.728	-0.775236	0.160312	-4.83579	1.32617e-06	3.97463e-05	3L	Pex10
FBgn0003114	11.4059	2.65786	0.549721	4.83492	1.33197e-06	3.98036e-05	2R	plu
FBgn0266711	533.638	-0.623073	0.128977	-4.83086	1.35942e-06	4.03885e-05	2R	EloC
FBgn0035760	58.2275	-1.5837	0.32781	-4.83115	1.35744e-06	4.03885e-05	3L	CG8607
FBgn0265262	520.059	0.833829	0.172788	4.82574	1.39485e-06	4.13215e-05	2L	Vha68-1
FBgn0028487	347.86	-0.782419	0.162271	-4.82167	1.42358e-06	4.20509e-05	3R	f-cup
FBgn0032262	33.2591	-1.72035	0.356946	-4.81963	1.43824e-06	4.23618e-05	2L	CG7384
FBgn0036331	149.429	0.917364	0.19081	4.80772	1.52658e-06	4.47071e-05	3L	CG14117
FBgn0031611	153.649	-1.09081	0.226871	-4.80807	1.52392e-06	4.47071e-05	2L	FIG4
FBgn0039054	357.903	1.25556	0.261339	4.80432	1.55277e-06	4.52156e-05	3R	Cow
FBgn0026372	35011.4	-0.404378	0.0841639	-4.80465	1.5502e-06	4.52156e-05	3L	RpL23A
FBgn0033015	1836.81	0.705857	0.147349	4.79039	1.66458e-06	4.83341e-05	2R	d4
FBgn0039282	107.76	-1.02263	0.213579	-4.78803	1.68423e-06	4.87665e-05	3R	Bili
FBgn0038326	1596.53	-0.40613	0.0848359	-4.78725	1.69085e-06	4.88203e-05	3R	CG5044
FBgn0034592	53.4401	1.25894	0.263119	4.78469	1.71253e-06	4.9032e-05	2R	CG9406
FBgn0030528	62.5976	-1.19679	0.250129	-4.78469	1.71248e-06	4.9032e-05	X	CG11095
FBgn0036369	22.475	-2.56412	0.535792	-4.78566	1.70423e-06	4.9032e-05	3L	CG10089
FBgn0041087	83.481	1.94833	0.407398	4.78239	1.73223e-06	4.94579e-05	2R	wun2
FBgn0039688	1532.29	1.14372	0.239673	4.772	1.82403e-06	5.17904e-05	3R	Kul
FBgn0027073	906.22	1.08222	0.226765	4.77244	1.82008e-06	5.17904e-05	2R	Ugt49B1
FBgn0024236	4423.52	0.635944	0.133534	4.76241	1.91298e-06	5.41657e-05	3L	foi
FBgn0040370	311.628	1.24711	0.262447	4.75185	2.01559e-06	5.67922e-05	X	CG13375
FBgn0023542	543.679	0.795026	0.167313	4.75173	2.01681e-06	5.67922e-05	X	Nmd3
FBgn0027794	578.054	-0.766281	0.161308	-4.75043	2.02986e-06	5.7003e-05	X	Lrpprc2
FBgn0034237	8828.18	-0.781062	0.164648	-4.74382	2.09725e-06	5.85745e-05	2R	eIF3b
FBgn0264678	49.6175	1.44533	0.304642	4.74435	2.09177e-06	5.85745e-05	X	lncRNA:CR43963
FBgn0034490	68.2924	1.21626	0.256952	4.7334	2.20787e-06	6.14965e-05	2R	CG9864
FBgn0037369	406.516	-0.647817	0.137012	-4.72817	2.26551e-06	6.29309e-05	3R	CG2100
FBgn0039802	856.061	0.600222	0.126988	4.72659	2.28324e-06	6.3252e-05	3R	dj-1beta
FBgn0033686	426.824	1.08612	0.229825	4.72587	2.29133e-06	6.3305e-05	2R	Hen1
FBgn0051626	39.2085	2.25017	0.476385	4.72344	2.31894e-06	6.38954e-05	2L	CG31626
FBgn0030403	900.003	-0.606372	0.128397	-4.72262	2.32822e-06	6.39791e-05	X	CG1824
FBgn0035833	514.031	-0.748781	0.158647	-4.71981	2.3607e-06	6.46984e-05	3L	CG7565
FBgn0030087	2783.04	-0.531714	0.112954	-4.70735	2.50956e-06	6.84122e-05	X	CG7766
FBgn0013684	8729.62	0.989019	0.210093	4.70752	2.50747e-06	6.84122e-05	mitochondrion_genome	ND5
FBgn0053087	4829.28	-1.08704	0.231118	-4.70338	2.55889e-06	6.95719e-05	2R	LRP1
FBgn0010238	400.411	1.7776	0.378078	4.70168	2.58034e-06	6.99695e-05	2R	Lac
FBgn0052944	198.896	0.790504	0.168191	4.70003	2.60118e-06	7.01635e-05	3R	CG32944
FBgn0027780	439.377	-0.736213	0.156627	-4.70043	2.59611e-06	7.01635e-05	2L	Aasdh
FBgn0001189	656.901	-0.50998	0.108568	-4.69734	2.63572e-06	7.09085e-05	X	hfw
FBgn0259111	810.245	1.49786	0.318925	4.69658	2.64554e-06	7.09864e-05	2L	Ndae1
FBgn0036956	51.9933	-1.85844	0.395778	-4.69566	2.65749e-06	7.11208e-05	3L	CG13813
FBgn0032428	10.1842	4.03104	0.859531	4.68982	2.73452e-06	7.29917e-05	2L	CG6405
FBgn0264982	64.1472	1.47683	0.315226	4.685	2.79966e-06	7.45363e-05	3R	lncRNA:CR44133
FBgn0034248	227.187	-0.833511	0.177972	-4.68339	2.82163e-06	7.49268e-05	2R	CG14483
FBgn0031435	42.1375	-2.02138	0.431948	-4.67967	2.87333e-06	7.61024e-05	2L	Elba2
FBgn0051864	163.261	0.87231	0.186799	4.66978	3.01523e-06	7.96549e-05	2L	Qtzl
FBgn0029941	2077.03	-0.4578	0.0981825	-4.66275	3.12017e-06	8.22154e-05	X	CG1677
FBgn0051720	14.0767	2.57199	0.553279	4.64863	3.34153e-06	8.75977e-05	2L	mthl15
FBgn0083975	33.7048	2.75894	0.593461	4.64891	3.337e-06	8.75977e-05	3R	Nlg4
FBgn0034542	429.368	-0.666676	0.143489	-4.64617	3.38158e-06	8.84215e-05	2R	Fem-1
FBgn0033115	28.1242	-2.07774	0.447984	-4.63798	3.51833e-06	9.17632e-05	2R	Spn42De
FBgn0261089	134.507	3.36794	0.728419	4.62363	3.77087e-06	9.81e-05	2L	Sytalpha
FBgn0023511	583.327	-0.583104	0.126222	-4.61966	3.8436e-06	9.97391e-05	X	Edem1
FBgn0262820	130.749	1.24646	0.270063	4.61544	3.92262e-06	0.000101532	2R	CG43191
FBgn0020270	4223.93	0.537286	0.116586	4.60851	4.0557e-06	0.000104713	2L	mre11
FBgn0031036	210.283	-0.735403	0.159615	-4.60735	4.07842e-06	0.000105035	X	CG14220
FBgn0020930	923.789	-0.538813	0.116963	-4.60671	4.09096e-06	0.000105094	2R	Dgkepsilon
FBgn0040070	3599.17	0.731464	0.158824	4.60551	4.11462e-06	0.000105437	2L	Trx-2
FBgn0015838	2145.22	-0.376468	0.0817799	-4.60343	4.1559e-06	0.000106229	2R	Vang
FBgn0033387	608.688	1.27557	0.27731	4.59978	4.22941e-06	0.00010784	2R	CG8008
FBgn0262579	1377.38	0.92451	0.201067	4.59801	4.26538e-06	0.000108487	3L	Ect4
FBgn0036975	457.896	-0.998394	0.21733	-4.59391	4.35011e-06	0.000110095	3L	CG5618
FBgn0050342	387.548	-0.562891	0.122529	-4.59393	4.34978e-06	0.000110095	2R	Prp38
FBgn0024314	1602.53	-0.442123	0.0962607	-4.59298	4.36957e-06	0.000110315	2L	Plap
FBgn0037622	551.111	-0.703576	0.153318	-4.58901	4.45351e-06	0.000112158	3R	CG8202
FBgn0260632	736.693	1.18203	0.258324	4.57576	4.74495e-06	0.000119205	2L	dl
FBgn0028327	3849.37	-0.555549	0.121472	-4.57348	4.79697e-06	0.000120217	X	l(1)G0320
FBgn0001222	912.508	-0.624442	0.136563	-4.57256	4.81808e-06	0.000120452	2R	Hsf
FBgn0032192	43.43	1.63547	0.357913	4.56947	4.88966e-06	0.000121944	2L	CG5731
FBgn0030151	1800.3	-0.476885	0.104395	-4.56807	4.92226e-06	0.000122459	X	CG1354
FBgn0027505	309.224	-0.845427	0.185241	-4.56392	5.02061e-06	0.000124604	2L	Rab3-GAP
FBgn0025109	502.357	-0.551475	0.120957	-4.55926	5.13331e-06	0.000127093	2L	Bem46
FBgn0033465	429.707	-0.694964	0.152496	-4.55727	5.18227e-06	0.000127996	2R	NA
FBgn0086711	37.7676	1.84495	0.405428	4.55061	5.34909e-06	0.000131799	2L	mol
FBgn0030230	369.539	-0.793635	0.174643	-4.54433	5.5111e-06	0.000135465	X	Rph
FBgn0031636	47.4294	1.62192	0.358334	4.52629	6.00276e-06	0.000147197	2L	CG12194
FBgn0032420	281.983	1.00007	0.221002	4.52514	6.03569e-06	0.0001473	2L	CG6583
FBgn0003997	145.146	1.43202	0.316456	4.52518	6.03455e-06	0.0001473	3L	hid
FBgn0051100	16.1622	4.39321	0.971375	4.52268	6.10625e-06	0.000148668	3R	CG31100
FBgn0027657	401.4	1.56584	0.346297	4.52167	6.13538e-06	0.000149023	3R	glob1
FBgn0033019	462.485	0.805561	0.178604	4.51031	6.47333e-06	0.00015686	2R	CG10395
FBgn0051777	295.521	1.58738	0.35226	4.50628	6.59729e-06	0.000159486	2L	CG31777
FBgn0040682	31.4273	1.55893	0.346042	4.50504	6.63599e-06	0.000160044	3R	CG14664
FBgn0038745	852.681	-0.496868	0.110307	-4.50442	6.65534e-06	0.000160134	3R	CG4538
FBgn0020764	351.502	-1.31556	0.292382	-4.49945	6.81292e-06	0.000163542	2R	Alas
FBgn0015277	665.394	-0.746802	0.166151	-4.49473	6.96574e-06	0.00016682	2R	Pi3K59F
FBgn0033184	559.744	-0.726874	0.161786	-4.49282	7.0286e-06	0.000167933	2R	mEFTu2
FBgn0261673	143.035	2.30547	0.51375	4.48752	7.20556e-06	0.000171761	2R	nemy
FBgn0039846	403.171	-0.55381	0.12346	-4.48575	7.26592e-06	0.000172798	3R	PNPase
FBgn0042177	800.501	-0.510074	0.1138	-4.48219	7.38826e-06	0.0001753	3L	Arts
FBgn0052707	325.237	-0.647888	0.144708	-4.4772	7.56271e-06	0.000179025	X	APC4
FBgn0035165	2680.08	0.750353	0.167724	4.47374	7.6862e-06	0.000181529	3L	CG13887
FBgn0035113	587.954	-0.709676	0.158669	-4.47268	7.7246e-06	0.000182016	3L	pyx
FBgn0030028	16.9467	2.55777	0.572036	4.47134	7.77303e-06	0.000182738	X	Corp
FBgn0261862	157.383	0.73382	0.164153	4.47035	7.80912e-06	0.000183166	2R	whd
FBgn0033901	1673.44	-0.589926	0.132014	-4.46865	7.87154e-06	0.000184208	2R	O-fut1
FBgn0267002	477.027	-0.67963	0.152382	-4.46003	8.19465e-06	0.000191333	2R	unc-104
FBgn0003655	382.008	0.805304	0.18062	4.45855	8.25149e-06	0.000191484	X	swa
FBgn0034709	36.1462	2.6992	0.605419	4.45841	8.25716e-06	0.000191484	2R	Swim
FBgn0034965	252.586	-0.80476	0.180482	-4.45896	8.23589e-06	0.000191484	2R	ppk29
FBgn0037290	133.095	1.50255	0.337194	4.45603	8.34907e-06	0.000193178	3R	CG1124
FBgn0053494	1937.92	0.933235	0.209834	4.4475	8.68754e-06	0.000200557	3R	CG33494
FBgn0038890	1304.36	0.743445	0.167233	4.44557	8.76588e-06	0.000201911	3R	CG7956
FBgn0038965	466.395	-0.531419	0.1197	-4.43959	9.01319e-06	0.000207142	3R	mats
FBgn0086130	699.404	-0.501195	0.112914	-4.43871	9.04982e-06	0.000207518	2L	Dbp21E2
FBgn0260440	22.7358	1.84759	0.416361	4.43747	9.10241e-06	0.000208258	3R	spdo
FBgn0086384	1699.86	-0.415648	0.0937417	-4.43397	9.25115e-06	0.00021119	X	Mer
FBgn0027611	104.483	1.32511	0.298972	4.43222	9.3269e-06	0.000212014	2L	LManII
FBgn0265351	111.532	-0.832213	0.187766	-4.43218	9.3286e-06	0.000212014	3R	nac
FBgn0039335	421.63	-0.661915	0.149379	-4.4311	9.3755e-06	0.000212608	3R	Vps33B
FBgn0266685	17.1299	-1.97727	0.446354	-4.42983	9.43077e-06	0.000213389	3L	asRNA:CR45175
FBgn0038344	2525.49	0.727119	0.164207	4.42806	9.50829e-06	0.000214669	3R	obe
FBgn0030878	742.646	0.959682	0.217173	4.41897	9.91716e-06	0.000223409	X	CG6769
FBgn0039882	174.916	-0.896226	0.202897	-4.41716	1.00008e-05	0.000224798	3R	Rift
FBgn0033225	619.739	-0.434303	0.0984345	-4.4121	1.02373e-05	0.000229611	2R	TTLL12
FBgn0039644	3176.46	0.919571	0.208723	4.4057	1.05441e-05	0.000235977	3R	rdog
FBgn0260780	44.6464	1.56815	0.356071	4.40403	1.06257e-05	0.000237285	X	wisp
FBgn0034606	16.3474	2.28114	0.518182	4.4022	1.07158e-05	0.000238777	2R	ASPP
FBgn0037529	946.06	-0.520826	0.118341	-4.40104	1.07733e-05	0.000239537	3R	mRpS9
FBgn0005666	21.1903	2.1553	0.489851	4.39991	1.08295e-05	0.000240264	4	bt
FBgn0029922	557.966	-1.259	0.28628	-4.39781	1.0935e-05	0.000242081	X	CG14431
FBgn0038829	745.541	-0.519887	0.118346	-4.39294	1.1183e-05	0.000247038	3R	CG17271
FBgn0029660	20.3581	3.73101	0.849662	4.39117	1.12744e-05	0.000248521	X	CG10801
FBgn0031086	83.6542	1.57443	0.35866	4.38975	1.1348e-05	0.000249607	X	fd19B
FBgn0003891	3681.02	-0.439884	0.100231	-4.38869	1.14037e-05	0.000250296	2R	tud
FBgn0267487	1437.66	-0.373001	0.0851626	-4.37986	1.18753e-05	0.000260089	3L	Ptp61F
FBgn0033518	301.868	-1.26225	0.288335	-4.37771	1.19934e-05	0.000261566	2R	Prx2540-2
FBgn0019662	513.778	0.633068	0.144612	4.3777	1.19938e-05	0.000261566	3L	qm
FBgn0003250	208.235	0.916344	0.209475	4.37448	1.2172e-05	0.00026489	3L	Rh4
FBgn0014395	37.3294	-1.4534	0.332314	-4.37357	1.22228e-05	0.000265432	X	tilB
FBgn0011770	207.541	-0.876947	0.200701	-4.36943	1.24573e-05	0.000269952	X	Gip
FBgn0034141	750.737	-0.859415	0.196823	-4.36645	1.26285e-05	0.000273084	2R	CG8311
FBgn0037744	546.812	-0.49745	0.113988	-4.36407	1.27664e-05	0.000275486	3R	NA
FBgn0035825	417.9	-0.740101	0.169774	-4.35933	1.30463e-05	0.000280934	3L	CG8111
FBgn0054031	265.349	0.751514	0.172507	4.35643	1.32203e-05	0.000284083	3L	CG34031
FBgn0023091	18.7754	3.36509	0.77256	4.35577	1.32602e-05	0.000284346	2L	dimm
FBgn0037972	30.8485	3.14825	0.722875	4.35518	1.3296e-05	0.000284517	3R	CG10005
FBgn0028484	1062.7	-0.838349	0.192616	-4.35243	1.34635e-05	0.000287503	3L	Ack
FBgn0039916	43.7277	1.55111	0.356575	4.35002	1.36128e-05	0.000290086	4	Ekar
FBgn0039296	504.827	0.972996	0.223912	4.34544	1.39e-05	0.000295591	3R	Sil1
FBgn0001987	413.666	1.40136	0.322623	4.34366	1.40129e-05	0.000297376	2L	Gli
FBgn0028399	1365.56	0.787592	0.181433	4.34095	1.41869e-05	0.000300445	3L	TMS1
FBgn0085376	172.238	-1.28068	0.295449	-4.33468	1.45974e-05	0.000308502	3R	CG34347
FBgn0030796	1055.18	1.56339	0.360845	4.33259	1.47367e-05	0.000310168	X	CG4829
FBgn0052512	2005.13	-1.28569	0.296744	-4.33265	1.47328e-05	0.000310168	X	CG32512
FBgn0264746	14.9455	2.4446	0.564626	4.32959	1.49387e-05	0.000313773	3L	CG44004
FBgn0025373	2006.52	-1.13464	0.262098	-4.32907	1.49739e-05	0.000313869	2R	Fpps
FBgn0004623	8.97879	4.37374	1.01164	4.32341	1.53637e-05	0.000321384	3L	Gbeta76C
FBgn0029785	25882.6	-0.478769	0.11085	-4.31906	1.56699e-05	0.000326223	X	RpL35
FBgn0032586	4547.75	0.850601	0.196954	4.31879	1.56889e-05	0.000326223	2L	Tpr2
FBgn0038470	1809.97	0.76442	0.177	4.31876	1.56905e-05	0.000326223	3R	CG18213
FBgn0025382	412.152	-0.60138	0.139292	-4.31739	1.57887e-05	0.000327599	X	Rab27
FBgn0267347	690.621	0.800145	0.185372	4.31642	1.58581e-05	0.000328376	2L	squ
FBgn0266304	69.1654	1.55434	0.360543	4.3111	1.62445e-05	0.000335022	2L	asRNA:CR44969
FBgn0026593	106.472	1.33427	0.309489	4.3112	1.62374e-05	0.000335022	3L	CG5707
FBgn0040096	41.1197	-1.51351	0.351489	-4.30599	1.66241e-05	0.000342162	2L	lectin-33A
FBgn0051388	116.982	-1.02143	0.237335	-4.30375	1.67934e-05	0.000344954	3R	CG31388
FBgn0036547	123.748	-0.88781	0.206369	-4.30204	1.69229e-05	0.00034692	3L	CG17032
FBgn0029167	27759.5	1.15801	0.269268	4.30059	1.70344e-05	0.000348509	3L	Hml
FBgn0000071	122.986	-2.15614	0.501672	-4.29791	1.72415e-05	0.000352043	3R	Ama
FBgn0263022	88.0832	0.936651	0.218163	4.29335	1.75999e-05	0.000358647	3R	CG43317
FBgn0011230	6418.44	0.373425	0.0870323	4.29065	1.78154e-05	0.000362318	2L	poe
FBgn0013689	55.1736	1.46216	0.340839	4.28989	1.78761e-05	0.000362832	mitochondrion_genome	trnA
FBgn0032329	334.835	0.816366	0.190508	4.28521	1.82566e-05	0.000369823	2L	Art8
FBgn0032729	685.741	-0.660579	0.154267	-4.28206	1.85173e-05	0.000374364	2L	L2HGDH
FBgn0250755	33.8153	-1.60347	0.374937	-4.27663	1.89741e-05	0.000382843	3R	CG42233
FBgn0053978	40.1424	1.40573	0.328823	4.27504	1.91105e-05	0.000384837	4	CG33978
FBgn0037637	2868.89	0.514749	0.120428	4.27432	1.91721e-05	0.000385322	3R	IscU
FBgn0035523	49.4725	-1.35407	0.316866	-4.27332	1.92587e-05	0.000386306	3L	Ctl1
FBgn0038851	16.9481	2.63285	0.616244	4.27241	1.93373e-05	0.000387123	3R	dmrt93B
FBgn0038881	151.738	-1.12939	0.264487	-4.27011	1.95378e-05	0.000390375	3R	CG16791
FBgn0001942	28469.6	-0.447838	0.104909	-4.26884	1.96496e-05	0.000391845	2L	eIF4A
FBgn0031894	59.5784	1.6101	0.377879	4.26089	2.03618e-05	0.000403808	2L	CG4496
FBgn0261649	77.7826	1.84195	0.432262	4.26119	2.03339e-05	0.000403808	3R	tinc
FBgn0265810	73.7738	-1.6263	0.381687	-4.26082	2.03677e-05	0.000403808	2L	asRNA:CR44599
FBgn0086355	1799.2	-0.602598	0.141525	-4.25787	2.06379e-05	0.000408376	3R	Tpi
FBgn0035253	3914.92	-0.367797	0.0864065	-4.25658	2.07575e-05	0.00040995	3L	CG7971
FBgn0038260	86.7962	2.67595	0.629735	4.24933	2.14407e-05	0.000419043	3R	CG14855
FBgn0039560	642.9	-0.795315	0.187168	-4.24921	2.14527e-05	0.000419043	3R	BOD1
FBgn0029924	204.431	-0.985219	0.23185	-4.24937	2.1437e-05	0.000419043	X	CG4586
FBgn0262952	6517.4	0.851321	0.200275	4.25077	2.13035e-05	0.000419043	mitochondrion_genome	ND4
FBgn0267635	2072.89	0.887682	0.208932	4.24867	2.15041e-05	0.000419043	3L	lncRNA:CR45973
FBgn0036764	1625.21	0.957325	0.225305	4.24902	2.14712e-05	0.000419043	3L	CG5535
FBgn0028379	17.0217	2.52421	0.594072	4.24899	2.14737e-05	0.000419043	3L	fan
FBgn0052225	24.113	2.11605	0.498149	4.24783	2.1585e-05	0.000419822	3L	CG32225
FBgn0051159	115.002	-0.873462	0.205681	-4.24667	2.16968e-05	0.000419963	3R	mRRF2
FBgn0033692	508.702	1.00855	0.237457	4.2473	2.16365e-05	0.000419963	2R	wash
FBgn0015558	133.241	1.34554	0.316859	4.24648	2.17152e-05	0.000419963	X	tty
FBgn0264984	112.37	2.04359	0.481408	4.24503	2.18565e-05	0.0004219	3R	lncRNA:CR44135
FBgn0040206	844.121	-0.679195	0.160031	-4.24415	2.19425e-05	0.000422765	3R	krz
FBgn0024994	505.573	-0.841005	0.198226	-4.24265	2.20895e-05	0.000424002	X	Ugalt
FBgn0029896	3580.53	1.05528	0.248729	4.2427	2.20848e-05	0.000424002	X	CG3168
FBgn0033204	73.6742	1.78211	0.420725	4.23581	2.27734e-05	0.000436312	2R	CG2065
FBgn0032744	611.937	0.634828	0.149983	4.23266	2.30947e-05	0.000441643	2L	Ttc19
FBgn0038056	356.507	0.876783	0.207248	4.23061	2.33063e-05	0.000444859	3R	CG5961
FBgn0003137	2047.3	1.45474	0.343939	4.22963	2.34076e-05	0.000445962	3R	Ppn
FBgn0032422	51.5207	3.04163	0.719664	4.22645	2.37406e-05	0.000451467	2L	atilla
FBgn0033373	337.803	-0.698015	0.165201	-4.22526	2.3867e-05	0.000452839	2R	CG8080
FBgn0036862	154.928	-1.0813	0.255933	-4.22493	2.39011e-05	0.000452839	3L	Gbs-76A
FBgn0037754	329.745	-1.06897	0.253088	-4.2237	2.40319e-05	0.000454477	3R	CG8500
FBgn0010100	3469.19	-0.550266	0.130682	-4.21071	2.54569e-05	0.000480105	2L	mAcon1
FBgn0038725	37.3078	1.5538	0.36903	4.2105	2.54807e-05	0.000480105	3R	CG6184
FBgn0264291	663.125	0.533545	0.12678	4.20842	2.57162e-05	0.000483653	3R	Det
FBgn0034264	37.5681	2.43237	0.578372	4.20554	2.6046e-05	0.00048896	2R	Dlish
FBgn0004650	21.63	2.69716	0.641489	4.20453	2.61628e-05	0.000490254	X	fs(1)N
FBgn0039665	424.294	0.966159	0.230016	4.20039	2.66451e-05	0.00049838	3R	CG2310
FBgn0032781	1762.34	0.507453	0.120867	4.19843	2.68771e-05	0.000501415	2L	RtcB
FBgn0016034	403.448	-0.576428	0.137304	-4.19819	2.69052e-05	0.000501415	3L	mael
FBgn0038387	197.251	-0.668742	0.15951	-4.19249	2.75914e-05	0.00051327	3R	blp
FBgn0264895	623.328	1.49698	0.357524	4.18709	2.82559e-05	0.000524679	2L	RapGAP1
FBgn0022800	15.0598	2.51914	0.601955	4.18492	2.85264e-05	0.000528744	3R	Cad96Ca
FBgn0030451	63.6641	-0.988307	0.23635	-4.18154	2.89536e-05	0.000535694	X	CG15717
FBgn0016032	186.082	1.28663	0.307869	4.17913	2.92626e-05	0.000539997	2R	lbm
FBgn0001258	16604.6	-1.32116	0.316149	-4.17891	2.92916e-05	0.000539997	3L	Ldh
FBgn0259823	122.891	1.12156	0.268502	4.17708	2.9528e-05	0.000542922	3R	CG42404
FBgn0264748	24.5293	2.58108	0.617947	4.17686	2.95561e-05	0.000542922	3L	CG44006
FBgn0033807	28.3241	2.28642	0.548053	4.17188	3.0209e-05	0.000553922	2R	AQP
FBgn0037618	19.21	2.13874	0.512853	4.17027	3.04239e-05	0.000556866	3R	ouib
FBgn0051370	21.9636	1.88396	0.452081	4.16731	3.08219e-05	0.000563146	3R	CG31370
FBgn0038191	10.6286	2.82524	0.678496	4.16397	3.12764e-05	0.000570433	3R	CG9925
FBgn0039946	65.9542	-1.35907	0.326486	-4.16271	3.14487e-05	0.000572556	X	ATbp
FBgn0041182	2595.57	0.811138	0.194981	4.1601	3.18113e-05	0.00057813	2L	Tep2
FBgn0035111	1069.37	-0.350669	0.0843299	-4.1583	3.20622e-05	0.000581659	3L	Dis3l2
FBgn0039759	9.41633	4.0645	0.978103	4.15549	3.24592e-05	0.000587821	3R	CG9733
FBgn0052436	728.737	0.642139	0.154642	4.15242	3.28977e-05	0.000594712	3L	CG32436
FBgn0010247	2609.17	-1.51281	0.364449	-4.15095	3.31101e-05	0.000597497	3R	Parp
FBgn0011828	825.581	1.3843	0.333996	4.14465	3.40331e-05	0.000613074	3L	Pxn
FBgn0035312	669.515	0.830952	0.200569	4.14297	3.42843e-05	0.000616515	3L	CG15820
FBgn0004118	631.102	-0.587004	0.141729	-4.14175	3.44669e-05	0.000618714	3R	nAChRbeta2
FBgn0031773	135.019	-0.922504	0.223019	-4.13644	3.52743e-05	0.000632101	2L	Fbw5
FBgn0029657	127.262	1.50165	0.363317	4.13315	3.57821e-05	0.000640081	X	CG12535
FBgn0267605	29.1056	1.76476	0.427105	4.13192	3.59749e-05	0.000642232	3L	asRNA:CR45943
FBgn0035693	60.6654	1.15691	0.280016	4.13158	3.60276e-05	0.000642232	3L	CG8219
FBgn0034025	537.488	-0.490851	0.118907	-4.12801	3.6591e-05	0.000651142	2R	Pgant1
FBgn0027779	1913.15	-0.358904	0.0870015	-4.12526	3.7032e-05	0.000657589	2L	VhaSFD
FBgn0283535	7992.72	-0.408783	0.0991001	-4.12495	3.70816e-05	0.000657589	3R	Vha26
FBgn0033696	90.9102	-0.924816	0.224387	-4.12152	3.76387e-05	0.000665922	2R	Cyp6g2
FBgn0263977	4994.9	0.696625	0.169032	4.12125	3.76814e-05	0.000665922	3R	Tim17b
FBgn0259734	671.029	-0.722426	0.175502	-4.11634	3.84936e-05	0.000679104	X	Nost
FBgn0031247	223.878	-0.64882	0.157664	-4.11521	3.86835e-05	0.000680112	2L	CG11562
FBgn0261933	737.016	0.826565	0.200841	4.11551	3.86323e-05	0.000680112	3L	SmD1
FBgn0033427	435.934	0.697944	0.169768	4.11115	3.93686e-05	0.000690972	2R	Smyd4-1
FBgn0031307	6483.42	-0.840737	0.204631	-4.10855	3.98144e-05	0.000697603	2L	MFS3
FBgn0266599	57812.9	-0.678429	0.165214	-4.10635	4.01952e-05	0.000701876	3R	Hsc70-4
FBgn0030511	149.855	-0.773188	0.188274	-4.10672	4.01318e-05	0.000701876	X	CG11158
FBgn0032200	995.977	0.564793	0.137791	4.09892	4.15078e-05	0.000722343	2L	CG5676
FBgn0034720	9.27976	3.56049	0.868642	4.09892	4.15083e-05	0.000722343	2R	Liprin-gamma
FBgn0029689	476.639	0.771515	0.18832	4.09682	4.18859e-05	0.000727679	X	CG6428
FBgn0034654	1849.52	-0.6117	0.149376	-4.09503	4.2212e-05	0.000732104	2R	eIF3k
FBgn0037917	300.826	-0.735883	0.179722	-4.09456	4.2298e-05	0.000732355	3R	wkd
FBgn0020388	1460.59	0.715387	0.174792	4.09279	4.26216e-05	0.000736714	3L	Gcn5
FBgn0038583	188.722	-0.69354	0.169499	-4.0917	4.28224e-05	0.000738939	3R	CG7183
FBgn0003638	1663.98	-0.572255	0.139927	-4.08966	4.32e-05	0.000744201	X	su(w[a])
FBgn0011259	150.762	1.01694	0.248811	4.08718	4.36646e-05	0.000750943	2L	Sema1a
FBgn0039969	1200.8	0.560367	0.137326	4.08055	4.49291e-05	0.000771396	2R	Fis1
FBgn0010808	828.262	-0.378091	0.0927284	-4.0774	4.55412e-05	0.000780598	3R	Chchd3
FBgn0036752	4632.96	1.40482	0.34462	4.07644	4.57305e-05	0.000782533	3L	Adgf-A
FBgn0035122	246.662	-0.599614	0.147147	-4.07493	4.60288e-05	0.000786325	3L	mRpL17
FBgn0031764	255.669	0.594822	0.14614	4.07023	4.69666e-05	0.000801011	2L	CG9107
FBgn0036931	139.69	-1.13192	0.278132	-4.06971	4.70721e-05	0.000801477	3L	CG14183
FBgn0040099	72.4464	2.66937	0.656074	4.0687	4.72764e-05	0.00080264	2L	lectin-28C
FBgn0030904	170.677	3.05144	0.749999	4.0686	4.7297e-05	0.00080264	X	upd2
FBgn0051467	60.513	-1.31846	0.324687	-4.0607	4.89252e-05	0.000828898	3R	CG31467
FBgn0266211	59.7805	-1.23414	0.303994	-4.05975	4.91262e-05	0.00083093	2L	CR44906
FBgn0034013	726.131	1.14287	0.28163	4.05807	4.94808e-05	0.000835549	2R	unc-5
FBgn0015569	88.7046	1.71484	0.422759	4.0563	4.98568e-05	0.000840514	3R	alpha-Est10
FBgn0030174	56.0206	-1.3918	0.343464	-4.05223	5.0732e-05	0.000853864	X	CG15312
FBgn0031829	148.06	0.76677	0.189321	4.0501	5.11957e-05	0.000860256	2L	IFT52
FBgn0033507	454.379	0.667404	0.164947	4.04617	5.20632e-05	0.0008734	2R	CG12909
FBgn0037936	21.0304	2.96308	0.732682	4.04415	5.25125e-05	0.000879499	3R	CG6908
FBgn0029798	587.683	-0.544006	0.134683	-4.03915	5.36442e-05	0.000896365	X	CG4078
FBgn0005278	7343.93	-0.637198	0.157764	-4.03894	5.36944e-05	0.000896365	2L	Sam-S
FBgn0003074	2312.89	-0.545523	0.135182	-4.03547	5.4494e-05	0.000908234	2R	Pgi
FBgn0000114	21.2309	2.47159	0.612745	4.03364	5.49192e-05	0.000913834	2L	bru1
FBgn0086254	8010.97	-0.663159	0.164581	-4.02938	5.59248e-05	0.000929058	3L	CG6084
FBgn0038373	13.1253	2.10838	0.523348	4.02864	5.60998e-05	0.000930458	3R	CG4546
FBgn0032394	366.477	-0.699065	0.173584	-4.02725	5.64334e-05	0.000934478	2L	Hacd1
FBgn0028856	1202.59	0.688281	0.17108	4.02315	5.74237e-05	0.000947815	2L	CG18063
FBgn0014869	1453.56	-0.36098	0.0897189	-4.02345	5.73512e-05	0.000947815	3R	Pglym78
FBgn0032846	213.628	-0.597155	0.148478	-4.02185	5.77419e-05	0.00095016	2L	Pyroxd1
FBgn0033827	53.216	1.19576	0.297318	4.02182	5.77512e-05	0.00095016	2R	CG17047
FBgn0028670	2250.96	-0.679627	0.169084	-4.01945	5.83331e-05	0.000958195	3R	Vha100-2
FBgn0283500	1783.22	-0.405322	0.100854	-4.01888	5.84747e-05	0.000958986	3L	Sac1
FBgn0034403	56.8044	-1.66075	0.413387	-4.01742	5.88379e-05	0.000963401	2R	CG18190
FBgn0035955	77.0084	-1.01352	0.252364	-4.01609	5.91719e-05	0.000967325	3L	CG5194
FBgn0023407	2070.52	0.644045	0.160693	4.00793	6.12535e-05	0.000999758	2L	B4
FBgn0030740	3869.63	0.788614	0.196893	4.00528	6.19431e-05	0.00100941	X	CG9917
FBgn0004132	317.557	-0.766115	0.19148	-4.00101	6.30723e-05	0.00102618	2R	boca
FBgn0051676	251.504	1.20702	0.301827	3.99905	6.35978e-05	0.00103309	2L	CG31676
FBgn0031661	373.908	-0.465767	0.116501	-3.99796	6.38898e-05	0.00103619	2L	Gmd
FBgn0087002	55.7137	1.33443	0.334477	3.98961	6.61809e-05	0.00106827	4	apolpp
FBgn0262169	162.879	1.24086	0.310987	3.99006	6.60568e-05	0.00106827	2R	magu
FBgn0035811	68.1333	-1.10516	0.277004	-3.9897	6.61582e-05	0.00106827	3L	Mcad
FBgn0016076	902.568	0.607251	0.152254	3.9884	6.65201e-05	0.00107038	2L	vri
FBgn0283658	2036.64	-0.580348	0.145506	-3.98848	6.64968e-05	0.00107038	2L	muc
FBgn0029629	3303.96	-0.534616	0.134137	-3.98559	6.73128e-05	0.00108144	X	eIF3g1
FBgn0011706	73.7223	1.66656	0.418207	3.98502	6.74741e-05	0.00108233	3L	rpr
FBgn0037935	11.0103	3.53125	0.886285	3.98433	6.76703e-05	0.00108378	3R	CG6834
FBgn0016919	135.884	1.29498	0.325058	3.98385	6.78074e-05	0.00108428	2L	nompB
FBgn0000633	57.9161	1.66762	0.418807	3.98183	6.83861e-05	0.00108862	2R	CG17716
FBgn0262901	49.4105	1.40053	0.351679	3.9824	6.82238e-05	0.00108862	2R	lncRNA:CR43256
FBgn0042712	998.885	0.414625	0.10413	3.98179	6.83975e-05	0.00108862	3L	HBS1
FBgn0053468	64.8871	1.55271	0.39006	3.98069	6.87152e-05	0.00109199	2R	CG33468
FBgn0261276	3967.5	-0.499404	0.125487	-3.97973	6.89926e-05	0.0010947	2R	Opa1
FBgn0033062	1859.87	-0.400614	0.100678	-3.97915	6.91616e-05	0.00109568	2R	Ars2
FBgn0052343	372.433	-0.571485	0.143765	-3.97513	7.0342e-05	0.00111266	3L	Atac3
FBgn0039889	607.074	0.58204	0.14651	3.9727	7.10611e-05	0.00111956	4	Arl4
FBgn0033170	49.7202	-1.3021	0.327722	-3.97317	7.09217e-05	0.00111956	2R	sPLA2
FBgn0036926	83.0569	0.98493	0.247934	3.97256	7.11056e-05	0.00111956	3L	CG7646
FBgn0036152	353.771	0.942385	0.237308	3.97114	7.15292e-05	0.0011245	3L	CG6175
FBgn0028411	1297.53	0.939505	0.236719	3.96886	7.22179e-05	0.00113359	2R	Nxt1
FBgn0037778	112.361	-0.715739	0.180443	-3.96657	7.29148e-05	0.00114278	3R	mtTFB2
FBgn0032906	3672.62	0.632274	0.159451	3.96533	7.3296e-05	0.001147	2L	RPA2
FBgn0026738	522.51	0.488775	0.123368	3.96194	7.43438e-05	0.00116162	3L	CG7857
FBgn0010591	880.065	-0.552023	0.139387	-3.96036	7.48382e-05	0.00116757	2R	Sply
FBgn0033214	10.6864	2.2674	0.572624	3.95966	7.50568e-05	0.0011692	2R	CG1941
FBgn0030613	17.4849	3.02566	0.764265	3.95892	7.52899e-05	0.00117105	X	Rab3-GEF
FBgn0034535	83.9065	-0.785489	0.198449	-3.95814	7.55343e-05	0.00117307	2R	CG11110
FBgn0029094	1065.61	-1.17328	0.296572	-3.95616	7.61644e-05	0.00118107	3L	asf1
FBgn0000247	756.403	-0.510051	0.129218	-3.9472	7.90718e-05	0.0012243	3R	ca
FBgn0052850	224.285	0.724629	0.183747	3.94363	8.02571e-05	0.00124078	4	CG32850
FBgn0029888	515.569	-0.464258	0.117741	-3.94303	8.04576e-05	0.001242	X	ND-ASHI
FBgn0053289	7.37481	3.06017	0.776601	3.94046	8.13239e-05	0.00125161	3L	ppk5
FBgn0020392	560.498	-0.482518	0.122452	-3.94046	8.13244e-05	0.00125161	3L	Nmt
FBgn0261641	1586	-0.643786	0.163411	-3.93968	8.15908e-05	0.00125383	3R	CG42724
FBgn0032988	1483.35	0.558982	0.142093	3.93392	8.35716e-05	0.00128235	2L	Tif-IA
FBgn0032031	196.802	-0.726923	0.184843	-3.93266	8.40123e-05	0.00128526	2L	CG13390
FBgn0033205	2486.68	1.0878	0.276599	3.93276	8.39766e-05	0.00128526	2R	CG2064
FBgn0041710	2233.11	0.714328	0.181872	3.92764	8.57827e-05	0.00131039	3R	yellow-f
FBgn0267037	9.57029	3.42627	0.873114	3.9242	8.70197e-05	0.00132731	X	asRNA:CR45481
FBgn0032517	423.175	-0.737322	0.18795	-3.92296	8.74672e-05	0.00133215	2L	CG7099
FBgn0034362	445.054	0.566616	0.144501	3.92119	8.81138e-05	0.00133802	2R	CG5323
FBgn0035422	22855.8	-0.404833	0.103235	-3.92148	8.80064e-05	0.00133802	3L	RpL28
FBgn0263110	967.024	-0.573802	0.146381	-3.91992	8.85785e-05	0.00134309	3L	CG43367
FBgn0265633	10.951	3.55976	0.909118	3.91562	9.01714e-05	0.00136522	4	lncRNA:CR44440
FBgn0002643	1264.04	0.61995	0.158519	3.91088	9.19597e-05	0.00139025	2R	mam
FBgn0034940	239.785	0.701675	0.179549	3.90797	9.30731e-05	0.00140501	2R	CG16787
FBgn0085292	38.6602	1.46109	0.374491	3.90152	9.55899e-05	0.00144088	3L	CG34263
FBgn0038299	18.8043	2.66168	0.68245	3.90019	9.61186e-05	0.00144396	3R	Spn88Eb
FBgn0263233	9.8007	2.63731	0.676305	3.89958	9.63582e-05	0.00144396	2R	robls54B
FBgn0034876	695.412	-0.378146	0.0969597	-3.90003	9.61802e-05	0.00144396	2R	wmd
FBgn0264699	163.792	0.979895	0.251261	3.89991	9.62287e-05	0.00144396	3L	CG43968
FBgn0029996	2515.94	0.556458	0.142714	3.89912	9.65423e-05	0.00144409	X	UbcE2H
FBgn0034742	914.163	-0.498864	0.127951	-3.89886	9.66485e-05	0.00144409	2R	CG4294
FBgn0266745	29.2501	-1.27578	0.327272	-3.89822	9.69021e-05	0.00144577	3R	CG45218
FBgn0039504	29.7646	-1.18462	0.304002	-3.89676	9.74893e-05	0.00145242	3R	CG14260
FBgn0012344	39.3049	1.90593	0.489239	3.89571	9.79117e-05	0.0014566	3R	Dh44
FBgn0035204	674.734	-0.579198	0.14872	-3.89454	9.83839e-05	0.0014615	3L	CG2277
FBgn0000414	1145.02	0.818305	0.210199	3.893	9.90141e-05	0.00146873	3L	Dab
FBgn0005596	620.644	-0.549804	0.141277	-3.89166	9.95596e-05	0.00147469	3R	yem
FBgn0003483	988.206	0.636733	0.163659	3.8906	9.99949e-05	0.001479	3R	spn-E
FBgn0087011	29.0945	-1.68313	0.432719	-3.88967	0.000100382	0.00148259	2R	CG41520
FBgn0037760	1136.06	-0.522706	0.134417	-3.88868	0.00010079	0.00148646	3R	FBXO11
FBgn0051068	3.39604	5.99784	1.543	3.88713	0.000101438	0.00149388	3R	CG31068
FBgn0039117	508.371	-0.535043	0.13783	-3.8819	0.000103643	0.00152417	3R	tst
FBgn0039501	97.1837	0.917021	0.236312	3.88056	0.000104218	0.00152832	3R	TTLL6B
FBgn0027583	153.942	-0.792625	0.204275	-3.88019	0.000104373	0.00152832	3R	CG7601
FBgn0266411	2644.65	-0.663215	0.170915	-3.88039	0.000104291	0.00152832	3R	sima
FBgn0043903	469.284	-0.759139	0.195708	-3.87893	0.000104916	0.00153407	X	dome
FBgn0023528	487.852	-0.483945	0.124815	-3.87728	0.00010563	0.00154012	X	CG2924
FBgn0028940	48.89	1.69975	0.438387	3.87728	0.000105629	0.00154012	2L	Cyp28a5
FBgn0030876	334.714	0.907046	0.234064	3.8752	0.000106537	0.00154965	X	CG6762
FBgn0031114	850.104	0.544637	0.140548	3.87509	0.000106586	0.00154965	X	cactin
FBgn0027108	84.4683	1.56742	0.404523	3.87473	0.000106744	0.00154975	X	Inx2
FBgn0033000	1307.9	0.627873	0.162205	3.87086	0.000108454	0.00157235	2R	CG14464
FBgn0035206	479.822	-0.579934	0.149945	-3.86765	0.000109891	0.00159093	3L	CG9186
FBgn0037671	3449.34	-0.470232	0.121617	-3.8665	0.000110409	0.00159618	3R	ATP6AP2
FBgn0033266	274.594	-0.554991	0.143772	-3.86021	0.000113289	0.00163551	2R	Socs44A
FBgn0031213	914.849	-0.65566	0.170023	-3.8563	0.000115117	0.00165956	2L	galectin
FBgn0261929	700.411	1.05085	0.272574	3.85529	0.000115593	0.00166408	3R	5-HT2B
FBgn0029974	517.259	0.936993	0.243075	3.85475	0.000115846	0.00166539	X	dpr14
FBgn0033481	17.2786	1.89219	0.491093	3.85301	0.000116675	0.00167496	2R	CG12920
FBgn0037841	62.3686	1.10926	0.287973	3.85197	0.000117172	0.00167974	3R	CG4565
FBgn0030883	235.26	0.747922	0.19421	3.85111	0.000117584	0.00168329	X	CG7772
FBgn0051974	250.055	1.33076	0.345999	3.84613	0.00012	0.00171548	2L	CG31974
FBgn0035879	537.268	-0.641718	0.167038	-3.84175	0.000122162	0.00174396	3L	GAPcenA
FBgn0261596	12711.3	-0.398566	0.103829	-3.83868	0.000123695	0.00176339	2R	RpS24
FBgn0267551	141.88	1.25342	0.326616	3.83759	0.000124249	0.00176883	3R	asRNA:CR45891
FBgn0015269	1169.46	-0.415889	0.108391	-3.83693	0.000124584	0.00177114	3R	Nf1
FBgn0012036	10116.1	-0.617708	0.161046	-3.83561	0.000125252	0.00177816	2L	Aldh
FBgn0000221	152.921	-0.725295	0.189156	-3.83437	0.000125886	0.001779	X	brn
FBgn0053542	1126.91	1.45181	0.378644	3.83424	0.000125953	0.001779	X	upd3
FBgn0261363	286.856	-1.26882	0.330955	-3.8338	0.000126179	0.001779	2R	PPO3
FBgn0267976	1867.36	0.418661	0.109194	3.83412	0.000126016	0.001779	2L	Tim23
FBgn0035697	91.2318	-1.96913	0.51357	-3.83419	0.000125979	0.001779	3L	CG10163
FBgn0062440	279.543	-0.751961	0.196197	-3.83268	0.000126754	0.00178466	2R	EMRE
FBgn0050161	17.7964	2.07242	0.540808	3.83208	0.000127064	0.00178657	2R	CG30161
FBgn0030189	2474.26	1.42993	0.373614	3.82728	0.000129565	0.00181924	X	CG2909
FBgn0034730	43.7267	1.88732	0.493181	3.82683	0.000129802	0.00182007	2R	ppk12
FBgn0265058	124.038	-0.804054	0.21023	-3.82464	0.000130963	0.00183134	2R	asRNA:CR44169
FBgn0260450	713.185	-0.580785	0.151845	-3.82487	0.000130843	0.00183134	X	CalpC
FBgn0058045	2902.13	0.497308	0.130173	3.82036	0.000133257	0.00186087	3L	CG40045
FBgn0052815	62.9182	-1.24775	0.326671	-3.81959	0.000133672	0.00186159	X	CG32815
FBgn0038973	23.7847	-1.50904	0.395063	-3.81975	0.000133584	0.00186159	3R	Pebp1
FBgn0266657	36.6926	1.4169	0.371347	3.81556	0.000135873	0.00188969	3L	asRNA:CR45164
FBgn0264691	1942.94	0.650345	0.170514	3.81404	0.000136714	0.0018988	X	Lst8
FBgn0011205	1262.63	-0.510652	0.133906	-3.81351	0.000137009	0.00189973	3L	fbl
FBgn0032259	273.491	-0.657445	0.172411	-3.81325	0.000137151	0.00189973	2L	CG6144
FBgn0033349	1774.89	-0.378213	0.0992082	-3.81231	0.000137674	0.0019044	2R	CG8243
FBgn0262117	1481.15	0.513547	0.134855	3.80814	0.000140017	0.00193419	2R	IntS3
FBgn0031717	142.267	-0.799562	0.209997	-3.80749	0.000140386	0.00193668	2L	Oscillin
FBgn0031945	38.7872	1.67381	0.439715	3.80657	0.000140905	0.00194123	2L	CG7191
FBgn0034493	833.366	-0.949787	0.249639	-3.80465	0.000142007	0.00195379	2R	CG8908
FBgn0243514	390.447	1.1998	0.315424	3.80378	0.000142505	0.00195801	3R	eater
FBgn0027619	2374.23	0.421452	0.110819	3.80308	0.000142907	0.00195908	2R	eIF3j
FBgn0026061	35.7599	1.44981	0.38123	3.80298	0.000142965	0.00195908	3L	Mipp1
FBgn0039003	704.799	0.998104	0.262542	3.80169	0.00014371	0.00196666	3R	wfs1
FBgn0034804	31.9627	-1.43537	0.377599	-3.80131	0.000143934	0.00196709	2R	CG3831
FBgn0034931	136.939	-0.88964	0.234191	-3.79878	0.000145409	0.00198462	2R	CG2812
FBgn0259145	25.5317	1.62004	0.426643	3.79718	0.000146352	0.00199482	2R	CG42260
FBgn0052181	45.7618	2.43019	0.640285	3.79549	0.000147354	0.00200582	3L	CG32181
FBgn0025885	21590.2	-0.816385	0.215172	-3.79411	0.000148177	0.00201434	2R	Inos
FBgn0003886	232.122	1.40855	0.371546	3.79105	0.000150009	0.00203655	3R	alphaTub85E
FBgn0005649	2574.27	-0.546455	0.144165	-3.79049	0.000150348	0.00203779	3R	Rox8
FBgn0266676	29.7688	1.97761	0.521763	3.79025	0.000150499	0.00203779	3L	lncRNA:CR45166
FBgn0033426	521.326	-0.458177	0.120947	-3.78825	0.000151709	0.00205148	2R	CG1814
FBgn0040752	737.433	0.88049	0.232465	3.78762	0.000152097	0.00205401	2R	Prosap
FBgn0036846	326.416	-0.624656	0.165113	-3.78319	0.000154831	0.00208818	3L	MESR6
FBgn0013694	30.3277	1.5124	0.400215	3.77896	0.000157485	0.00212119	mitochondrion_genome	trnG
FBgn0034435	13.5672	5.01577	1.32816	3.77649	0.000159055	0.00213952	2R	fest
FBgn0261269	296.693	0.647206	0.171413	3.77571	0.000159554	0.00214342	2R	conv
FBgn0039329	121.776	-0.779601	0.206562	-3.77417	0.000160539	0.00215102	3R	CG10669
FBgn0259246	702.863	0.561731	0.148834	3.77422	0.000160506	0.00215102	2R	brp
FBgn0039804	9.76439	2.66513	0.706327	3.77323	0.000161148	0.00215635	3R	CG15544
FBgn0260746	506.124	2.5261	0.669785	3.77151	0.000162265	0.00216848	3R	Ect3
FBgn0034880	64.378	1.08823	0.288622	3.77044	0.000162961	0.00217493	2R	ItgaPS5
FBgn0036762	3113.7	-0.409794	0.108711	-3.76956	0.000163533	0.00217973	3L	CG7430
FBgn0050016	61.3189	1.00853	0.267659	3.76799	0.000164567	0.00218844	2R	CG30016
FBgn0031452	275.904	-0.556216	0.147619	-3.76792	0.000164614	0.00218844	2L	Cwc25
FBgn0035980	111.517	-0.700417	0.18594	-3.76691	0.000165283	0.00219449	3L	mRRF1
FBgn0052698	37.7242	-2.30045	0.611299	-3.76322	0.000167737	0.0022242	X	CARPB
FBgn0267041	15.2057	-1.80505	0.479698	-3.76289	0.000167964	0.00222433	X	asRNA:CR45485
FBgn0052196	29.4723	1.48415	0.394503	3.76208	0.000168507	0.00222864	3L	CG32196
FBgn0283536	1265.35	-0.321806	0.085581	-3.76025	0.000169746	0.00224213	3R	Vha13
FBgn0004400	190.815	-0.793168	0.210971	-3.75961	0.000170179	0.00224496	2R	rhi
FBgn0038989	801.118	0.740198	0.197122	3.75501	0.000173333	0.00228362	3R	CG6937
FBgn0038704	840.317	-0.376846	0.10037	-3.75457	0.00017364	0.00228474	3R	CG5316
FBgn0004587	3838.61	-0.634679	0.169061	-3.75413	0.000173942	0.00228578	3R	B52
FBgn0259916	117.231	-0.69357	0.184794	-3.7532	0.000174591	0.00229137	3L	CG42445
FBgn0033321	104.223	0.801572	0.213619	3.75235	0.000175186	0.00229624	2R	CG8738
FBgn0039136	821.614	-0.455172	0.12135	-3.75091	0.000176195	0.00230652	3R	CG5902
FBgn0262115	1397.67	0.425721	0.113588	3.74795	0.000178286	0.00232913	2R	CG17683
FBgn0262945	283.625	1.51585	0.404462	3.74782	0.000178377	0.00232913	X	lncRNA:CR43264
FBgn0024945	260.902	-0.587294	0.157071	-3.73904	0.000184728	0.00240898	3L	NitFhit
FBgn0040271	1972.6	1.2702	0.339765	3.73846	0.000185149	0.00241141	3R	Sulf1
FBgn0033272	571.079	-0.493066	0.132003	-3.73526	0.000187523	0.00243922	2R	RagC-D
FBgn0265901	218.454	-0.570821	0.152868	-3.73407	0.000188408	0.00244764	X	asRNA:CR44690
FBgn0260990	1097.84	-0.468839	0.125576	-3.73351	0.000188832	0.00245004	3R	yata
FBgn0035691	28.0063	-1.48382	0.397749	-3.73054	0.000191073	0.00247598	3L	CG7386
FBgn0031091	1088.15	0.383446	0.102829	3.72896	0.000192274	0.00248839	X	Phf7
FBgn0038972	424.722	-0.660004	0.177131	-3.72608	0.000194478	0.00251374	3R	CG7054
FBgn0030855	1235.26	0.896226	0.24055	3.72573	0.000194752	0.00251412	X	CG5800
FBgn0030605	568.929	-0.471649	0.126644	-3.72421	0.000195925	0.00252608	X	ND-B18
FBgn0035999	194.413	-0.701187	0.188346	-3.72286	0.000196979	0.00253647	3L	CG3552
FBgn0025352	814.441	-0.475393	0.127778	-3.72045	0.000198867	0.00255757	2R	Thiolase
FBgn0033289	2.79635	5.76777	1.55092	3.71894	0.000200057	0.00256966	2R	CG2121
FBgn0033905	178	-0.843609	0.226874	-3.7184	0.000200486	0.00257195	2R	CG18324
FBgn0051897	45.5954	1.11027	0.298752	3.71635	0.000202122	0.00258784	2L	CG31897
FBgn0039788	96.3259	1.33224	0.358493	3.71621	0.00020223	0.00258784	3R	Rpt6R
FBgn0266692	34.5323	1.22947	0.331183	3.71235	0.00020534	0.00262436	3L	asRNA:CR45182
FBgn0023536	212.221	-0.638986	0.172163	-3.71151	0.000206026	0.00262985	X	CG3156
FBgn0037513	135.1	-1.01311	0.273133	-3.70923	0.00020789	0.00264536	3R	pyd3
FBgn0083984	107.952	-0.731455	0.197192	-3.70936	0.000207782	0.00264536	3R	CG34148
FBgn0262524	571.6	0.857011	0.231058	3.70908	0.000208016	0.00264536	3L	ver
FBgn0034060	640.629	-0.411959	0.111195	-3.70484	0.000211523	0.00268663	2R	CG8370
FBgn0010278	3731.01	0.798206	0.215562	3.70291	0.000213138	0.00270379	2R	Ssrp
FBgn0259741	45.2221	-1.18741	0.320698	-3.70257	0.000213424	0.00270407	X	CG42395
FBgn0037332	645.233	-0.389231	0.105176	-3.70075	0.000214967	0.00271691	3R	Hcs
FBgn0033137	61.9105	0.924444	0.249788	3.70092	0.000214818	0.00271691	2R	Tsp42Ep
FBgn0264325	358.453	-0.584356	0.158035	-3.69763	0.000217622	0.00274526	3R	Atg6
FBgn0285962	192.844	-0.559117	0.151222	-3.69732	0.000217884	0.00274526	2R	CG46338
FBgn0036479	232.827	2.9872	0.807967	3.69717	0.000218014	0.00274526	3L	CG13458
FBgn0263088	6.46669	3.74298	1.01269	3.69606	0.000218968	0.00275389	2L	lncRNA:CR43356
FBgn0039809	288.993	0.674875	0.182635	3.69522	0.000219696	0.00275966	3R	CG15547
FBgn0028863	10.7434	2.96656	0.803014	3.69428	0.000220509	0.00276649	2L	CG4587
FBgn0036687	21.1448	-1.6547	0.448014	-3.69342	0.000221258	0.00277249	3L	CG6652
FBgn0037973	1454.57	2.11321	0.572399	3.69184	0.000222635	0.00278634	3R	CG18547
FBgn0030465	59.8213	-0.912048	0.24717	-3.68996	0.000224292	0.00280365	X	CG15743
FBgn0037386	53.6146	2.31971	0.628808	3.68906	0.000225081	0.00281008	3R	CG1208
FBgn0086906	64.6429	1.48682	0.40311	3.68837	0.000225694	0.00281431	3L	sls
FBgn0041180	8996.4	1.0348	0.280614	3.68763	0.000226351	0.00281908	2L	Tep4
FBgn0052791	666.71	1.24705	0.338474	3.68431	0.00022932	0.00285258	X	DIP-alpha
FBgn0010246	5412.26	0.515778	0.140122	3.68091	0.000232404	0.00288745	3L	Myo61F
FBgn0051473	6.03513	3.24394	0.881464	3.68017	0.00023308	0.00289234	3R	CG31473
FBgn0037612	361.789	-0.545925	0.148426	-3.67809	0.000234991	0.00291252	3R	CG8112
FBgn0262970	110.271	0.751312	0.204403	3.67564	0.000237256	0.00293705	2R	CR43281
FBgn0032246	1574.39	0.317162	0.0863347	3.67363	0.000239127	0.00295664	2L	Wdfy2
FBgn0039564	274.593	-0.49742	0.135454	-3.67225	0.000240426	0.00296912	3R	Nep7
FBgn0086446	353.357	-0.600308	0.163534	-3.67083	0.00024176	0.00298199	2L	DCTN6-p27
FBgn0044047	84.9566	-0.95844	0.261147	-3.67011	0.000242442	0.0029857	X	Ilp6
FBgn0032252	210.579	0.974914	0.265695	3.66929	0.00024322	0.0029857	2L	loh
FBgn0051251	157.479	0.574761	0.156641	3.66929	0.000243225	0.0029857	3R	CG31251
FBgn0262887	207.505	0.688022	0.187497	3.66951	0.000243018	0.0029857	2L	lncRNA:CR43242
FBgn0262109	19125.3	-0.857348	0.233675	-3.66898	0.00024352	0.00298574	3L	lncRNA:CR42862
FBgn0285910	1260.12	-0.318994	0.0870104	-3.66616	0.00024622	0.00301524	X	VhaAC39-1
FBgn0034729	11.4081	-2.88622	0.787511	-3.66499	0.000247346	0.00302344	2R	CG10344
FBgn0264679	32.2512	-1.62591	0.443649	-3.66485	0.00024748	0.00302344	2R	asRNA:CR43964
FBgn0010265	16673.1	-0.380324	0.103864	-3.66177	0.000250483	0.00305649	2L	RpS13
FBgn0267126	20.9215	-1.44509	0.395008	-3.65838	0.000253813	0.00309344	3R	lncRNA:CR45566
FBgn0032613	109.891	2.27131	0.620961	3.65774	0.000254447	0.00309748	2L	Nepl9
FBgn0263599	4308.48	0.408737	0.11177	3.65694	0.000255244	0.0031035	3L	l(3)72Ab
FBgn0031768	340.191	-0.438446	0.119929	-3.65588	0.000256298	0.00310941	2L	CG12393
FBgn0034126	56.7913	1.654	0.452426	3.65584	0.000256337	0.00310941	2R	jtb
FBgn0265419	11.7946	2.56715	0.702379	3.65493	0.000257251	0.00311682	3R	lncRNA:CR44331
FBgn0051637	1025.41	0.972353	0.266144	3.65349	0.000258702	0.00313069	2L	CG31637
FBgn0031676	223.112	-0.801528	0.219495	-3.6517	0.000260511	0.00314887	2L	senju
FBgn0015360	628.015	-0.425223	0.116517	-3.64945	0.000262806	0.00317286	3L	oxt
FBgn0033767	287.548	0.790127	0.216659	3.64687	0.000265459	0.00320112	2R	CG13148
FBgn0032680	15.8388	2.18922	0.601045	3.64235	0.000270163	0.00325402	2L	Ntf-2r
FBgn0013697	31.6027	1.3917	0.382206	3.64123	0.000271337	0.00326433	mitochondrion_genome	trnK
FBgn0032168	398.084	-0.516676	0.142002	-3.63852	0.000274205	0.00329496	2L	CG13126
FBgn0039257	13.8172	2.66288	0.732169	3.63698	0.000275857	0.00331093	3R	tnc
FBgn0263747	69.1597	1.29225	0.35551	3.63492	0.000278065	0.00333353	X	CG43672
FBgn0051821	137.66	2.95496	0.813623	3.63186	0.000281386	0.0033694	2L	CG31821
FBgn0025693	605.974	0.898468	0.247457	3.63081	0.000282536	0.00337922	2R	ZnT41F
FBgn0032391	178.801	-0.662331	0.182487	-3.62946	0.000284011	0.0033929	2L	escl
FBgn0036199	926.076	-0.757447	0.208776	-3.62804	0.000285583	0.00340771	3L	Bmcp
FBgn0031149	3851.21	-0.503967	0.138945	-3.6271	0.000286625	0.00341617	X	Stt3A
FBgn0037809	403.03	0.708636	0.195409	3.62643	0.000287372	0.0034211	3R	CG12818
FBgn0033117	364.757	-0.501323	0.138262	-3.62589	0.000287965	0.00342417	2R	CG3358
FBgn0030290	26.1596	1.52816	0.421945	3.6217	0.000292669	0.00347608	X	CG11756
FBgn0086444	803.276	-0.413203	0.114125	-3.62061	0.000293912	0.00348681	2L	l(2)37Cb
FBgn0030858	781.765	-0.49101	0.135691	-3.61858	0.00029622	0.00351013	X	IntS2
FBgn0051051	7.35384	3.21869	0.88963	3.61801	0.000296873	0.0035138	3R	CG31051
FBgn0020416	385.767	-1.29619	0.358443	-3.61617	0.000298999	0.00353488	2L	Idgf1
FBgn0063923	50.7499	-1.11329	0.308039	-3.61411	0.000301376	0.00355887	3L	Kaz1-ORFB
FBgn0032849	259.503	-0.603282	0.166974	-3.61304	0.00030263	0.00356388	2L	mRpS18B
FBgn0035237	453.554	0.917306	0.253901	3.61286	0.000302843	0.00356388	3L	CG13917
FBgn0029133	4778.54	0.627179	0.173577	3.61326	0.000302375	0.00356388	X	REG
FBgn0020386	2265.16	0.559005	0.154935	3.608	0.000308562	0.00362702	3L	Pdk1
FBgn0000447	1302.79	-0.430062	0.119241	-3.60667	0.000310152	0.00364154	3R	Dhod
FBgn0024194	410.071	-0.56021	0.155379	-3.60544	0.000311626	0.00365465	3L	rasp
FBgn0263077	1556	0.944363	0.261988	3.6046	0.000312631	0.00366225	2R	CG43340
FBgn0034527	439.97	0.777161	0.215656	3.60371	0.000313705	0.00366645	2R	CG9945
FBgn0033428	724.831	0.633342	0.175737	3.60393	0.000313444	0.00366645	2R	Updo
FBgn0030518	269.441	0.69219	0.192222	3.60099	0.000317011	0.00370087	X	CG11134
FBgn0003261	15349.8	-0.40396	0.112194	-3.60054	0.000317558	0.00370303	3R	Rm62
FBgn0002521	826.618	0.592011	0.164495	3.59896	0.00031949	0.00371711	4	pho
FBgn0259228	2516.3	0.69827	0.194018	3.59899	0.000319456	0.00371711	X	C3G
FBgn0036063	61.7097	-0.894217	0.248517	-3.59821	0.000320415	0.00372364	3L	CG6674
FBgn0261439	1735.61	-0.419753	0.116704	-3.59673	0.000322248	0.00374071	2R	SdhA
FBgn0037375	105.043	0.9587	0.266654	3.59529	0.00032403	0.00375713	3R	kat-60L1
FBgn0037902	430.611	0.564129	0.15705	3.59202	0.000328123	0.00380029	3R	CG5281
FBgn0039328	672.8	0.769725	0.21432	3.59148	0.000328802	0.00380386	3R	CHKov2
FBgn0031390	1213.75	-0.367167	0.102307	-3.58886	0.000332123	0.00383794	2L	tho2
FBgn0027889	1435.36	-0.484582	0.135091	-3.58707	0.000334411	0.00386003	3R	ball
FBgn0010408	26046.3	-0.461285	0.12862	-3.58641	0.000335263	0.00386551	3L	RpS9
FBgn0026319	490.737	0.940803	0.262463	3.58451	0.000337706	0.00388931	2L	Traf4
FBgn0033735	306.611	-0.512887	0.143133	-3.58329	0.000339293	0.0039032	2R	Dera
FBgn0083940	43.7644	1.09657	0.306071	3.58273	0.000340023	0.00390721	X	RhoU
FBgn0037265	278.183	-0.623224	0.174105	-3.57958	0.000344145	0.00395016	3R	spartin
FBgn0032026	4254.95	0.797426	0.222839	3.57849	0.000345591	0.00396231	2L	CG7627
FBgn0036974	3622.88	-0.437521	0.122357	-3.57576	0.000349209	0.0039963	3L	eRF1
FBgn0263444	24.7102	2.03052	0.567919	3.57538	0.000349725	0.0039963	2R	asRNA:CR43467
FBgn0036126	705.534	0.555177	0.155275	3.57543	0.000349649	0.0039963	3L	Irbp18
FBgn0034817	295.877	-0.663414	0.185577	-3.57487	0.000350396	0.00399848	2R	Art7
FBgn0263339	18.9486	2.01927	0.564887	3.57465	0.000350696	0.00399848	2L	lncRNA:CR43420
FBgn0026634	587.371	-0.385626	0.107956	-3.57207	0.000354166	0.00403356	3R	ldlCp
FBgn0037010	976.255	-0.441286	0.123585	-3.57071	0.000356019	0.00405016	3L	CG4825
FBgn0032620	862.312	0.749764	0.210156	3.56764	0.000360205	0.00409324	2L	CG12288
FBgn0000808	53.6206	-0.975356	0.27347	-3.56659	0.000361653	0.00410515	X	gd
FBgn0039155	85.8599	2.15612	0.604674	3.56575	0.000362813	0.00411375	3R	Kal1
FBgn0264386	39.2708	2.28395	0.640988	3.56318	0.000366392	0.00414974	X	Ca-alpha1T
FBgn0015351	450.832	0.96766	0.271627	3.56246	0.000367399	0.00415656	3R	CG14906
FBgn0033677	255.123	0.754934	0.211968	3.56154	0.00036868	0.00415839	2R	CG8321
FBgn0043025	175.157	1.11982	0.314427	3.56147	0.000368778	0.00415839	3L	Adgf-A2
FBgn0036629	71.0725	-0.939105	0.263662	-3.56178	0.000368355	0.00415839	3L	GluRS-m
FBgn0034915	1413.64	1.17223	0.329323	3.55953	0.00037152	0.0041847	2R	eIF6
FBgn0263601	3535.98	0.658292	0.185035	3.55767	0.000374163	0.00420985	3L	mib1
FBgn0032509	964.719	-0.462143	0.129936	-3.55669	0.000375557	0.0042209	2L	CG6523
FBgn0030011	57.6345	-0.937358	0.26357	-3.5564	0.000375974	0.00422096	X	Gbeta5
FBgn0010043	236.829	-0.999609	0.281152	-3.5554	0.000377405	0.00423239	3R	GstD7
FBgn0031920	8.96313	3.64409	1.02525	3.55434	0.000378934	0.00424025	2L	CG6441
FBgn0266084	702.257	1.15912	0.326095	3.55453	0.000378649	0.00424025	3L	Fhos
FBgn0032864	4897.67	0.643661	0.181195	3.55232	0.000381848	0.00426402	2L	CG2493
FBgn0067317	40.5828	1.1839	0.333277	3.55229	0.00038189	0.00426402	3R	Cby
FBgn0030655	649.195	0.394843	0.111163	3.55191	0.000382442	0.00426554	X	CG9213
FBgn0052625	1144.1	0.778856	0.219321	3.55122	0.00038345	0.00427213	X	CG32625
FBgn0000395	1098.05	0.998307	0.281388	3.54779	0.000388476	0.00432258	2R	cv-2
FBgn0034417	166.259	1.64285	0.463094	3.54756	0.000388822	0.00432258	2R	CG15117
FBgn0033187	387.39	-0.63624	0.179399	-3.54651	0.000390368	0.00433508	2R	PIG-G
FBgn0003475	1988.19	1.32893	0.374991	3.54391	0.000394241	0.00437334	2L	spir
FBgn0050052	42.3297	1.8955	0.535052	3.54264	0.000396144	0.0043897	2R	Obp49a
FBgn0037891	1737.36	-0.355588	0.100473	-3.53915	0.000401415	0.00443975	3R	CG5214
FBgn0011289	986.963	-0.526043	0.148638	-3.53908	0.000401527	0.00443975	3R	TfIIA-L
FBgn0283503	498.382	-0.521101	0.147358	-3.5363	0.000405768	0.00448181	3L	Neurl4
FBgn0032000	207.41	-0.518553	0.146716	-3.5344	0.000408701	0.00450935	2L	CG8372
FBgn0030001	11.6706	2.32822	0.659132	3.53226	0.000412028	0.00454117	X	cyr
FBgn0035087	1576.53	-0.798924	0.226209	-3.5318	0.000412736	0.00454409	2R	CG2765
FBgn0036279	80.8372	1.19533	0.338649	3.5297	0.000416031	0.00457545	3L	Ncc69
FBgn0035107	400.918	-0.409532	0.116188	-3.52472	0.000423928	0.0046573	3L	mri
FBgn0033627	269.1	-0.47678	0.135291	-3.5241	0.000424916	0.00466316	2R	CG13204
FBgn0034005	27.4537	2.67077	0.758053	3.5232	0.000426373	0.00466915	2R	ItgaPS4
FBgn0036849	28.5536	-1.29653	0.367992	-3.52325	0.000426282	0.00466915	3L	CG14079
FBgn0052666	417.388	0.461305	0.131014	3.52103	0.00042987	0.00470242	X	Drak
FBgn0038327	234.735	-0.686384	0.195074	-3.51859	0.000433849	0.00473584	3R	Trax
FBgn0038893	1174.31	0.950472	0.270124	3.51865	0.000433751	0.00473584	3R	Archease
FBgn0265434	9778.54	-0.418831	0.119198	-3.51373	0.000441868	0.00481824	2R	zip
FBgn0038550	151.007	-0.990163	0.281896	-3.51251	0.000443895	0.0048352	3R	CG17801
FBgn0016797	178.245	-1.20868	0.344251	-3.51105	0.000446334	0.0048566	3L	fz2
FBgn0260749	758.005	-0.59821	0.170478	-3.50901	0.000449777	0.00488888	2L	Utx
FBgn0062565	106.278	0.752088	0.214433	3.50734	0.000452612	0.00491448	X	Or19b
FBgn0033782	330.785	-0.988125	0.281821	-3.50622	0.000454517	0.00492995	2R	sug
FBgn0264481	21.2159	1.93953	0.553629	3.5033	0.000459533	0.00497908	3L	asRNA:CR43889
FBgn0034786	408.402	-0.568455	0.162433	-3.49962	0.000465921	0.00504297	2R	CG13531
FBgn0032793	926.16	0.908632	0.259665	3.49925	0.000466577	0.00504474	2L	CG10189
FBgn0034753	3338	-0.472594	0.135082	-3.49857	0.000467766	0.00505227	2R	CG2852
FBgn0029529	120.403	-0.630663	0.180321	-3.49746	0.000469719	0.00506611	X	CG13365
FBgn0029718	540.367	0.609478	0.174272	3.49728	0.000470036	0.00506611	X	mRpL30
FBgn0085466	1090.51	1.23273	0.352804	3.49408	0.00047569	0.00511712	3R	CG34437
FBgn0036239	2484.39	0.713808	0.204293	3.49404	0.000475767	0.00511712	3L	Pop2
FBgn0020248	30.7931	1.24868	0.357439	3.49342	0.000476883	0.00512375	3L	stet
FBgn0010173	10605.1	0.589207	0.168714	3.49234	0.000478801	0.00513896	3R	RpA-70
FBgn0035027	386.308	-0.474988	0.136123	-3.48941	0.000484087	0.00519026	2R	CG3511
FBgn0037312	625.419	0.587463	0.168415	3.48819	0.000486296	0.0052085	3R	CG11999
FBgn0031232	9.83971	2.05903	0.590559	3.48658	0.000489237	0.00523453	2L	CG11617
FBgn0031518	16.5119	2.01575	0.578204	3.48623	0.000489871	0.00523585	2L	CG3277
FBgn0038115	13.3963	1.78931	0.51333	3.48569	0.00049087	0.00524106	3R	CG7966
FBgn0038039	576.814	-0.51645	0.148208	-3.48464	0.000492807	0.00525626	3R	CG5196
FBgn0030057	541.707	-0.550193	0.158013	-3.48194	0.000497789	0.00530389	X	Ppt1
FBgn0037741	414.85	-0.493597	0.141881	-3.47894	0.000503395	0.0053427	3R	CG16908
FBgn0039666	11.9404	2.14243	0.615712	3.47959	0.000502173	0.0053427	3R	Diedel
FBgn0031575	279.96	0.580636	0.166896	3.47903	0.000503226	0.0053427	2L	Cep97
FBgn0086371	556.409	-0.504511	0.145021	-3.47888	0.000503517	0.0053427	3R	poly
FBgn0020445	53.4651	1.14822	0.330093	3.47848	0.000504259	0.00534282	2L	E23
FBgn0086683	882.04	0.578681	0.166368	3.47832	0.000504571	0.00534282	2L	Spf45
FBgn0029733	546.503	0.753693	0.216846	3.47571	0.0005095	0.00538945	X	CG6927
FBgn0040346	527.933	-0.491533	0.141636	-3.47039	0.000519708	0.00549176	X	CG3704
FBgn0051712	670.901	-0.419993	0.121042	-3.46981	0.00052082	0.00549784	2L	CG31712
FBgn0033159	1042.02	-1.04573	0.301466	-3.46881	0.000522777	0.00551282	2R	Dscam1
FBgn0086679	902.842	0.490056	0.141336	3.4673	0.000525706	0.00553801	3R	p
FBgn0260720	44.148	-1.07364	0.309776	-3.46585	0.000528549	0.00556224	2R	asRNA:CR42547
FBgn0032640	1892.11	0.508469	0.146753	3.4648	0.000530628	0.00557269	2L	Sgt
FBgn0035793	1424.64	-0.371905	0.107338	-3.46482	0.000530588	0.00557269	3L	CG7546
FBgn0037880	169.572	-0.634262	0.183402	-3.45832	0.000543559	0.00570264	3R	CG17726
FBgn0024150	31.2592	2.08374	0.603067	3.45523	0.000549816	0.00576239	3L	Ac78C
FBgn0014342	441.274	0.552181	0.160038	3.45031	0.000559936	0.0058505	3R	mia
FBgn0030884	92.6604	1.62152	0.469933	3.45054	0.000559471	0.0058505	X	CG6847
FBgn0016694	1855.22	-0.450821	0.130647	-3.45067	0.000559206	0.0058505	3L	Pdp1
FBgn0046247	401.149	-0.414575	0.120199	-3.44907	0.000562527	0.0058716	3R	CG5938
FBgn0263395	868.179	0.386882	0.112211	3.4478	0.000565163	0.00588712	2R	hppy
FBgn0036502	373.587	-0.654574	0.189845	-3.44794	0.00056488	0.00588712	3L	CG7841
FBgn0025624	204.144	-0.639888	0.185664	-3.44649	0.000567919	0.00590982	X	CG4025
FBgn0036008	370.889	-0.4716	0.136953	-3.44353	0.00057418	0.00596891	3L	CG3408
FBgn0278604	1300.01	0.558769	0.162383	3.44106	0.000579444	0.00601753	3R	dmt
FBgn0040227	4806.74	-0.412603	0.119922	-3.4406	0.000580423	0.00602159	3R	eIF3d1
FBgn0039612	116.071	-1.37596	0.400087	-3.43915	0.000583541	0.00604783	3R	Nepl19
FBgn0038427	978.493	-0.379573	0.110384	-3.43867	0.000584586	0.00605254	3R	ema
FBgn0263832	1731.51	-0.554232	0.161261	-3.43686	0.000588492	0.00608683	3L	Rcd5
FBgn0037298	712.648	-0.753299	0.21931	-3.43485	0.00059288	0.00611986	3R	Sccpdh1
FBgn0031637	1058.81	-0.415699	0.121015	-3.43511	0.000592304	0.00611986	2L	mxt
FBgn0041102	12.9347	1.70574	0.496639	3.43457	0.000593487	0.00611996	3R	ocn
FBgn0037782	3.55544	4.67071	1.36159	3.43034	0.000602826	0.00621002	3R	Npc2d
FBgn0036183	7.33598	3.54907	1.03507	3.42883	0.000606183	0.00623833	3L	CG6083
FBgn0265988	808.507	-0.643487	0.187695	-3.42837	0.000607227	0.0062428	3L	mv
FBgn0034605	446.675	0.936576	0.273287	3.42708	0.000610109	0.00626615	2R	Ugt49C1
FBgn0051219	5.99242	5.16885	1.50886	3.42566	0.000613311	0.00628147	3R	CG31219
FBgn0031414	5.53208	3.61537	1.0554	3.4256	0.000613439	0.00628147	2L	eys
FBgn0011726	8981.95	0.673212	0.196512	3.42581	0.000612974	0.00628147	2R	tsr
FBgn0004584	2195.3	-0.396533	0.115824	-3.4236	0.000617979	0.00632164	2L	Rrp1
FBgn0039341	564.55	-0.43364	0.126718	-3.42208	0.000621443	0.00635074	3R	CG5112
FBgn0029175	147.534	-0.607241	0.17755	-3.42011	0.000625962	0.00639055	2R	sotv
FBgn0013675	22658	0.539039	0.157684	3.41849	0.000629701	0.00642232	mitochondrion_genome	COX2
FBgn0262533	60.0378	1.95651	0.57276	3.41594	0.000635623	0.00647628	3L	CR43087
FBgn0053792	13.8239	1.76307	0.51645	3.41382	0.000640599	0.0065205	2R	CG33792
FBgn0024366	52.6261	1.54055	0.451389	3.41291	0.000642737	0.00653577	X	CG11409
FBgn0263232	662.577	-0.888278	0.260295	-3.41258	0.000643511	0.00653715	3L	Nxf3
FBgn0030508	66.3475	1.66924	0.489282	3.41162	0.000645789	0.0065538	X	CG15760
FBgn0037617	529.771	0.527889	0.15477	3.41079	0.000647738	0.00656708	3R	nom
FBgn0263593	1990.72	-0.700963	0.205558	-3.41006	0.000649492	0.00657835	2R	Lpin
FBgn0051643	119.201	-0.635313	0.186324	-3.40971	0.000650315	0.00658019	2L	CG31643
FBgn0022160	1236.75	-0.624039	0.183037	-3.40937	0.000651132	0.00658196	2R	Gpo1
FBgn0024491	4528.31	-1.21819	0.357393	-3.40855	0.000653091	0.00659525	3R	Bin1
FBgn0037020	659.323	0.401597	0.117872	3.40705	0.00065669	0.00660546	3L	Pex14
FBgn0026196	1972.54	0.507428	0.148958	3.40652	0.000657968	0.00660546	2L	nop5
FBgn0013531	141.422	-0.632803	0.185754	-3.40668	0.000657587	0.00660546	2L	MED20
FBgn0034243	1788.31	-0.373009	0.109474	-3.40727	0.00065616	0.00660546	2R	Ns2
FBgn0013683	35.3273	1.131	0.331952	3.40711	0.000656538	0.00660546	mitochondrion_genome	ND4L
FBgn0052195	1051.15	1.75186	0.514172	3.40715	0.000656457	0.00660546	3L	CG32195
FBgn0040705	7.9802	2.87957	0.845562	3.40551	0.000660394	0.00662333	2L	ND-B8
FBgn0035540	202.067	-0.553842	0.162712	-3.40382	0.000664512	0.00665811	3L	Syx17
FBgn0026263	211.967	1.36855	0.403124	3.39487	0.000686603	0.00687274	3L	bip1
FBgn0038455	2365.39	1.16908	0.344401	3.39452	0.000687487	0.00687487	3R	CG14907
FBgn0004034	103.592	2.45447	0.723251	3.39366	0.000689649	0.00688977	X	y
FBgn0032230	8.66527	2.09682	0.618422	3.3906	0.000697401	0.00695843	2L	lft
FBgn0030984	15.9469	-1.73656	0.512199	-3.39041	0.000697879	0.00695843	X	tgy
FBgn0265312	52.4283	1.47893	0.436835	3.38555	0.000710354	0.00707593	2R	lncRNA:CR44285
FBgn0037749	374.141	-0.701178	0.207184	-3.38432	0.000713541	0.00710078	3R	CG9471
FBgn0260985	2172.05	0.724323	0.21417	3.38201	0.000719584	0.00715396	3L	RfC4
FBgn0031265	1108.21	-0.443654	0.131245	-3.38034	0.000723958	0.00719048	2L	CG2794
FBgn0024912	1130.56	0.786702	0.232759	3.3799	0.000725125	0.0071951	3R	agt
FBgn0003326	8.02216	2.52656	0.747779	3.37875	0.000728161	0.00721823	2R	sca
FBgn0030725	5.82995	2.63028	0.779207	3.37558	0.000736593	0.00729476	X	CG8958
FBgn0011596	40.2942	0.894888	0.265149	3.37504	0.000738047	0.00730211	3R	fzo
FBgn0011566	126.503	-0.598758	0.177462	-3.37402	0.000740801	0.00732229	X	Smyd3
FBgn0033520	77.6017	-1.17497	0.348463	-3.37186	0.000746614	0.00737263	2R	Prx2540-1
FBgn0003423	77.2787	-0.810901	0.240561	-3.37087	0.000749314	0.00739218	X	slgA
FBgn0052205	38.2329	-0.989714	0.293682	-3.37002	0.000751623	0.00740782	3L	hpRNA:CR32205
FBgn0035676	41.9212	1.08353	0.321687	3.36826	0.000756445	0.00744818	3L	ssp6
FBgn0028833	1387.33	-0.398536	0.118344	-3.36762	0.000758195	0.00745825	3R	Dak1
FBgn0032536	76.0146	0.85274	0.253574	3.36288	0.000771327	0.00758015	2L	Ance-3
FBgn0000180	36.4123	1.09448	0.325512	3.36233	0.000772866	0.007588	2L	bib
FBgn0032535	118.551	0.99735	0.296655	3.36199	0.000773833	0.00759023	2L	Ance-2
FBgn0051915	597.925	-0.464635	0.138246	-3.36093	0.000776792	0.00761196	2L	CG31915
FBgn0032029	146.286	-0.63226	0.188455	-3.35497	0.000793732	0.00777054	2L	CG17292
FBgn0035854	136.826	0.656733	0.195878	3.35276	0.0008001	0.0078254	3L	CG8005
FBgn0037719	593.143	0.562648	0.167881	3.35148	0.000803817	0.00785426	3R	bocks
FBgn0031713	423.505	0.590077	0.176146	3.34992	0.000808335	0.00788638	2L	Coq6
FBgn0033480	251.49	0.641586	0.191529	3.34982	0.000808643	0.00788638	2R	mRpL42
FBgn0005198	905.006	-0.478418	0.142915	-3.34757	0.000815231	0.00794307	3L	gig
FBgn0038974	219.808	-1.01976	0.304727	-3.34648	0.000818437	0.00796243	3R	CG5377
FBgn0034735	453.666	-0.542642	0.162158	-3.34637	0.000818771	0.00796243	2R	CG4610
FBgn0039125	729.395	0.829452	0.24792	3.34564	0.000820939	0.00796251	3R	Ndc1
FBgn0030628	1094.5	-0.405744	0.121277	-3.34559	0.000821086	0.00796251	X	CG9114
FBgn0036147	9089.53	-0.429338	0.12833	-3.34558	0.000821109	0.00796251	3L	Plod
FBgn0038683	853.701	-0.357029	0.10675	-3.34452	0.000824257	0.00797517	3R	CG11779
FBgn0265928	452.432	0.808977	0.241894	3.34435	0.000824749	0.00797517	3L	lncRNA:CR44717
FBgn0267763	18.8414	1.39747	0.417815	3.3447	0.000823711	0.00797517	3R	lncRNA:CR46094
FBgn0037018	253.558	-0.45107	0.134904	-3.34365	0.000826849	0.00798794	3L	CG4042
FBgn0040056	858.06	0.609342	0.182412	3.34048	0.000836343	0.00807205	3L	CG17698
FBgn0052368	1018.94	1.05595	0.316241	3.33906	0.000840629	0.00810578	3L	CG32368
FBgn0032782	118.716	-0.772328	0.231331	-3.33863	0.000841924	0.00811064	2L	Rab9
FBgn0040091	533.636	-0.946765	0.283714	-3.33704	0.000846767	0.00814964	2R	Ugt317A1
FBgn0264721	39.1848	1.54832	0.464209	3.3354	0.000851782	0.00819021	3L	lncRNA:CR43989
FBgn0031304	1361.19	0.321021	0.0962615	3.33488	0.00085335	0.0081976	2L	CG4552
FBgn0024997	14.4327	1.78481	0.535435	3.33337	0.000858	0.0082225	X	CG2681
FBgn0037156	250.452	-0.446326	0.1339	-3.33326	0.000858335	0.0082225	3L	CG11523
FBgn0032935	168.287	0.743322	0.223019	3.333	0.000859151	0.0082225	2L	Atg18b
FBgn0035947	1058.54	0.36558	0.109677	3.33325	0.000858378	0.0082225	3L	Srp68
FBgn0259740	1169.59	0.808644	0.24277	3.3309	0.000865642	0.00827689	3R	CG42394
FBgn0030610	477.428	0.470278	0.141296	3.32831	0.000873745	0.00834658	X	CG9065
FBgn0026259	2382.01	-0.343919	0.10334	-3.32805	0.000874572	0.00834671	3L	eIF5B
FBgn0038966	381.304	0.606549	0.182308	3.32705	0.000877713	0.0083689	3R	pinta
FBgn0047178	212.164	-0.552755	0.166176	-3.32633	0.000879989	0.00838279	3L	CG32147
FBgn0035065	191.929	-0.570532	0.17161	-3.32459	0.000885472	0.0084272	2R	CG3589
FBgn0041184	1994.34	0.63414	0.190809	3.32343	0.000889188	0.00845471	2L	Socs36E
FBgn0259152	1684.95	0.718683	0.216326	3.32222	0.000893048	0.00848355	3R	Clbn
FBgn0019936	14264.2	-0.620396	0.186815	-3.32091	0.000897237	0.00851544	3R	RpS20
FBgn0027617	454.168	-0.542257	0.163408	-3.31843	0.000905251	0.00857562	3R	CG5808
FBgn0034641	1739.61	0.510797	0.153919	3.31861	0.000904657	0.00857562	2R	mahj
FBgn0058178	782.8	0.782223	0.235816	3.31709	0.000909601	0.00860887	3L	CG40178
FBgn0001280	640.562	0.575949	0.173707	3.31563	0.000914362	0.00864595	3R	janA
FBgn0000318	1077.53	0.517168	0.156024	3.31468	0.000917484	0.00866747	2L	cl
FBgn0023519	252.318	0.475021	0.14333	3.31417	0.000919166	0.00867537	X	mRpL16
FBgn0038407	805.334	0.614991	0.185638	3.31285	0.000923509	0.00870834	3R	CG6126
FBgn0085465	27.8076	2.25211	0.680125	3.31132	0.000928575	0.00874807	3R	CG34436
FBgn0260971	89.2646	-0.732584	0.221339	-3.30978	0.000933701	0.00878828	X	CG42594
FBgn0035208	31.9649	1.34212	0.405666	3.30844	0.000938172	0.00882003	3L	CG9184
FBgn0052039	224.839	-0.496783	0.150165	-3.30825	0.000938795	0.00882003	3L	CG32039
FBgn0265038	8.1882	2.81208	0.850158	3.30771	0.000940606	0.00882895	3R	asRNA:CR44155
FBgn0264006	14.5553	2.44245	0.738479	3.30741	0.000941617	0.00883035	3L	dysc
FBgn0037742	652.251	0.403546	0.122051	3.30638	0.000945106	0.00885497	3R	Rpt3R
FBgn0036202	76.0176	1.70249	0.515252	3.30419	0.000952528	0.00891636	3L	CG6024
FBgn0052703	559.429	-0.659591	0.199692	-3.30305	0.000956393	0.00894437	X	Erk7
FBgn0015553	359.485	-0.487017	0.147629	-3.29892	0.000970561	0.00906034	2L	tos
FBgn0033054	4.44301	3.85545	1.16869	3.29895	0.000970456	0.00906034	2R	CG14591
FBgn0032811	365.024	-0.517717	0.157081	-3.29586	0.000981196	0.00915129	2L	CG10268
FBgn0085245	11.234	2.09542	0.635929	3.29505	0.000984054	0.0091696	2R	CG34216
FBgn0033845	1540	-0.437385	0.132832	-3.29278	0.000992033	0.00923555	2R	mars
FBgn0031107	1242.36	0.409093	0.124286	3.29154	0.000996415	0.00926792	X	HERC2
FBgn0015521	10357.1	-0.56685	0.172255	-3.29075	0.000999202	0.00928542	2L	RpS21
FBgn0038194	45.5019	1.03891	0.315838	3.28938	0.00100407	0.00932218	3R	Cyp6d5
FBgn0039691	1716.77	0.471101	0.143286	3.28785	0.00100956	0.00936468	3R	IntS11
FBgn0086710	16867.3	-0.336935	0.10253	-3.2862	0.00101547	0.00940252	2L	RpL30
FBgn0030739	375.844	-0.413567	0.125848	-3.28625	0.00101532	0.00940252	X	SWIP
FBgn0038303	864.897	-0.412194	0.125491	-3.28466	0.00102107	0.00943814	3R	SIDL
FBgn0033031	23.5556	1.38897	0.422871	3.28463	0.00102116	0.00943814	2R	CG8245
FBgn0261835	34.4358	1.24339	0.378996	3.28075	0.0010353	0.00956025	X	lncRNA:CR42767
FBgn0040931	485.019	-0.443007	0.135057	-3.28014	0.00103756	0.00957248	X	CG9034
FBgn0261618	12102.6	-0.506472	0.154495	-3.27825	0.00104454	0.00962817	3R	larp
FBgn0030915	324.492	0.530161	0.16174	3.27786	0.00104599	0.00963286	X	CG6179
FBgn0264384	33.12	-1.16245	0.354686	-3.27742	0.00104761	0.00963914	X	lncRNA:CR43836
FBgn0267762	27.7378	1.24559	0.380163	3.27647	0.00105114	0.00966299	3R	asRNA:CR46093
FBgn0033706	9.54142	4.50268	1.3748	3.27516	0.00105601	0.00969901	2R	Vha36-2
FBgn0266953	66.8893	1.01164	0.309101	3.27284	0.00106471	0.00977016	3L	lncRNA:CR45404
FBgn0036888	2412.04	-0.391279	0.11958	-3.27212	0.00106742	0.00978632	3L	CG9330
FBgn0031044	445.675	-0.471444	0.144259	-3.26805	0.00108293	0.00991959	X	MKP-4
FBgn0051431	369.658	0.804695	0.246277	3.26744	0.00108526	0.00992322	3R	CG31431
FBgn0263112	652.037	0.471861	0.144406	3.26759	0.00108466	0.00992322	4	Mitf
FBgn0033921	459.971	0.6091	0.186448	3.26687	0.00108745	0.00993438	2R	tej
FBgn0051510	427.472	-0.513735	0.157325	-3.26543	0.00109299	0.00997604	3R	CG31510
FBgn0050340	159.642	0.744089	0.227905	3.26491	0.00109499	0.00998544	2R	CG30340
FBgn0052576	253.715	-0.472929	0.144876	-3.26437	0.00109707	0.00999554	X	CG32576
FBgn0266044	191.256	1.40561	0.430664	3.26382	0.0010992	0.010006	2L	lncRNA:CR44809
FBgn0038629	8.37902	2.55617	0.78342	3.26283	0.00110306	0.0100233	3R	CG14304
FBgn0000017	2277.19	0.474366	0.145378	3.263	0.00110241	0.0100233	3L	Abl
FBgn0011207	1364.14	-0.306075	0.0938183	-3.26243	0.00110462	0.0100287	2L	pelo
FBgn0039488	592.062	0.966323	0.296245	3.2619	0.00110667	0.0100295	3R	CG6066
FBgn0083991	4.79038	2.86049	0.876894	3.26207	0.00110601	0.0100295	3R	CG34155
FBgn0003464	2577.75	-0.350552	0.107488	-3.26131	0.001109	0.0100417	X	sol
FBgn0010774	2691.76	0.599058	0.183921	3.25714	0.00112542	0.0101814	3R	Ref1
FBgn0010651	1402.78	-0.913455	0.280578	-3.25562	0.00113145	0.010227	2R	MFS14
FBgn0262601	954.398	0.540185	0.165938	3.25535	0.00113254	0.0102278	2L	SmB
FBgn0264446	57.45	0.859417	0.264034	3.25495	0.00113413	0.0102332	X	asRNA:CR43864
FBgn0038268	175.695	-0.568016	0.174534	-3.25447	0.00113605	0.0102414	3R	CG3631
FBgn0036910	16.6586	1.47779	0.454223	3.25344	0.00114017	0.0102696	3L	Cyp305a1
FBgn0040759	7.45191	3.57439	1.09919	3.25184	0.0011466	0.0103184	2R	CG13177
FBgn0039048	16.5299	1.79333	0.551641	3.2509	0.0011504	0.0103435	3R	CG17111
FBgn0030872	307.343	-0.43976	0.135472	-3.24613	0.00116986	0.0105092	X	Ucp4A
FBgn0038291	207.198	0.813471	0.250623	3.2458	0.00117121	0.0105121	3R	CG3984
FBgn0034858	1392.53	-0.444434	0.137	-3.24404	0.00117848	0.0105682	2R	eIF2Bdelta
FBgn0027491	12.9287	1.89165	0.583309	3.24296	0.00118294	0.0105804	2L	Cdk5alpha
FBgn0030093	1820.3	-0.43252	0.133353	-3.24342	0.00118102	0.0105804	X	Bap111
FBgn0036819	60.6283	-0.824159	0.254135	-3.243	0.0011828	0.0105804	3L	Dysb
FBgn0030657	146.943	0.567975	0.175167	3.24248	0.00118496	0.0105892	X	cerv
FBgn0003292	5.62757	2.97569	0.918341	3.24029	0.00119409	0.0106615	3L	rt
FBgn0038909	317.19	1.34447	0.415639	3.2347	0.00121769	0.0108527	3R	CG6569
FBgn0036900	855.418	-0.45596	0.140971	-3.23442	0.0012189	0.0108527	3L	CG8765
FBgn0083961	144.1	-0.756582	0.233902	-3.23461	0.0012181	0.0108527	2L	CG34125
FBgn0261016	191.297	0.79793	0.246734	3.23398	0.0012208	0.0108527	2R	clos
FBgn0036777	156.625	1.00258	0.309993	3.23419	0.0012199	0.0108527	3L	CG7341
FBgn0029801	995.597	-0.576127	0.178263	-3.2319	0.0012297	0.0109224	X	CG15771
FBgn0087007	382.767	1.33601	0.413574	3.2304	0.00123616	0.0109702	3L	bbg
FBgn0031772	139.2	0.661629	0.204988	3.22764	0.00124815	0.0110671	2L	CG13994
FBgn0084008	87.011	0.671389	0.208033	3.22731	0.00124958	0.0110702	2R	lncRNA:CR41443
FBgn0037688	186.183	-0.517791	0.160662	-3.22287	0.00126915	0.0112338	3R	CG9356
FBgn0086909	360.101	0.664655	0.206296	3.22186	0.00127361	0.0112636	2L	CG31751
FBgn0004858	47.9254	1.3007	0.404271	3.2174	0.00129357	0.0114303	2L	elB
FBgn0020391	188.734	-0.525079	0.163229	-3.21683	0.00129616	0.0114432	2R	Nrk
FBgn0025549	484.423	0.372063	0.115768	3.21388	0.00130957	0.0115517	X	unc-119
FBgn0263256	15.1606	1.8067	0.562846	3.20994	0.00132761	0.0117008	2L	CG43394
FBgn0031011	175.432	-0.916846	0.285725	-3.20884	0.0013327	0.0117356	X	CG8034
FBgn0037491	202.209	-0.457429	0.142579	-3.20825	0.00133544	0.0117496	3R	CG1227
FBgn0086681	87.2665	-1.43063	0.445964	-3.20795	0.00133687	0.0117521	2L	Mst36Fa
FBgn0028862	12.2128	1.56531	0.488297	3.20566	0.00134755	0.011833	2L	dao
FBgn0030805	692.216	0.50268	0.156819	3.20548	0.00134838	0.011833	X	wus
FBgn0037900	236.479	-0.610611	0.190575	-3.20405	0.00135509	0.0118817	3R	CG5276
FBgn0000244	162.049	1.00923	0.315187	3.20201	0.00136474	0.0119561	3R	by
FBgn0033741	3201.42	0.513084	0.160629	3.19423	0.00140206	0.0122725	2R	CG8545
FBgn0052814	8.63961	2.09113	0.655113	3.19201	0.00141285	0.0123459	X	CG32814
FBgn0031420	188.598	-0.563022	0.176385	-3.19202	0.00141283	0.0123459	2L	Atxn7
FBgn0039525	70.0259	-0.928267	0.290868	-3.19137	0.00141599	0.0123595	3R	CG5646
FBgn0020493	801.222	0.539952	0.1692	3.1912	0.00141682	0.0123595	3R	Dad
FBgn0028360	1222.03	-0.443019	0.13889	-3.18971	0.00142416	0.0124121	X	Cdc7
FBgn0010397	1705.98	0.715937	0.224485	3.18924	0.00142649	0.0124121	2R	LamC
FBgn0259212	3773.27	0.413886	0.12977	3.18937	0.00142581	0.0124121	3R	cno
FBgn0028530	254.908	-0.435012	0.136443	-3.18823	0.00143148	0.0124383	2L	mTTF
FBgn0000629	602.097	-0.369002	0.115742	-3.18814	0.00143192	0.0124383	3L	E(z)
FBgn0003328	231.205	1.24276	0.390063	3.18604	0.00144237	0.0125185	2R	NA
FBgn0037354	954.921	0.565726	0.177595	3.18548	0.00144515	0.012532	3R	CG12171
FBgn0050414	148.757	-0.811589	0.254908	-3.18385	0.00145329	0.0125813	2R	CG30414
FBgn0030790	882.393	-0.344379	0.108158	-3.18404	0.00145233	0.0125813	X	CG4768
FBgn0027359	602.658	0.544382	0.171056	3.18248	0.00146021	0.0126305	X	Tim8
FBgn0051390	506.015	0.528147	0.166003	3.18155	0.00146492	0.0126605	3R	MED7
FBgn0030761	322.254	-0.564078	0.177339	-3.18079	0.00146876	0.0126723	X	CG9784
FBgn0260441	19063.3	-0.547044	0.171979	-3.18088	0.00146829	0.0126723	3L	NA
FBgn0003575	725.316	-0.373455	0.117433	-3.18017	0.0014719	0.0126888	X	su(sable)
FBgn0039631	87.9705	-0.683323	0.21489	-3.17987	0.0014734	0.0126911	3R	Sirt7
FBgn0030196	369.102	0.36865	0.115943	3.17957	0.00147495	0.0126937	X	Psf3
FBgn0051005	167.843	-0.580007	0.182588	-3.17658	0.00149023	0.0128144	3R	qless
FBgn0001091	2978.22	-0.395463	0.124513	-3.17607	0.00149287	0.0128264	2R	Gapdh1
FBgn0034734	550.495	0.469679	0.147951	3.17456	0.00150062	0.0128822	2R	CG4554
FBgn0039319	12.5466	2.39605	0.755128	3.17304	0.00150854	0.0129393	3R	CG13659
FBgn0030522	186.632	-0.61736	0.19461	-3.17229	0.00151241	0.0129617	X	CG11103
FBgn0002590	30994.5	-0.30327	0.0957176	-3.16839	0.00153286	0.013126	X	RpS5a
FBgn0037525	336.658	0.710725	0.224508	3.16569	0.00154713	0.0132371	3R	CG17816
FBgn0052311	57.7382	1.62623	0.515276	3.15604	0.00159929	0.013672	3L	zormin
FBgn0033221	77.5349	1.21617	0.3855	3.15479	0.00160613	0.013719	2R	CG12825
FBgn0052099	273.383	0.676724	0.214574	3.1538	0.00161159	0.0137542	3L	CG32099
FBgn0037205	634.934	-0.3498	0.110965	-3.15235	0.0016196	0.0138111	3L	BoYb
FBgn0040319	2895.05	0.437711	0.138895	3.15138	0.00162502	0.0138458	X	Gclc
FBgn0013759	1068.19	-0.379292	0.120378	-3.15084	0.00162804	0.01386	3R	CASK
FBgn0032124	176.499	0.680357	0.215946	3.15059	0.00162943	0.0138603	2L	CG17855
FBgn0021847	416.444	-0.471715	0.149762	-3.14976	0.00163402	0.0138878	2R	Ttc7
FBgn0026598	340.328	-0.653012	0.207403	-3.14852	0.00164097	0.0139238	3R	Apc2
FBgn0261014	12155.1	0.352737	0.112025	3.14873	0.00163982	0.0139238	2R	NA
FBgn0035170	322.67	0.624556	0.198413	3.14776	0.00164526	0.0139487	3L	dpr20
FBgn0025743	840.351	-0.397971	0.126496	-3.14611	0.00165456	0.0140159	X	mbt
FBgn0262819	18.4509	1.64905	0.524557	3.14371	0.00166821	0.0141199	2R	CG43190
FBgn0033814	453.493	-0.761603	0.242302	-3.14319	0.00167115	0.0141331	2R	Qsox1
FBgn0037327	2137.69	0.345555	0.109966	3.14238	0.0016758	0.0141607	3R	PEK
FBgn0030706	21.1304	1.47024	0.468347	3.13922	0.001694	0.0143027	X	Lrp4
FBgn0033539	630.631	-0.373072	0.118883	-3.13814	0.00170022	0.0143434	2R	Git
FBgn0024362	772.608	-0.380446	0.121287	-3.13673	0.00170844	0.0144009	X	Naa30A
FBgn0051223	178.947	-0.517979	0.165204	-3.1354	0.00171622	0.0144546	3R	CG31223
FBgn0031814	465.923	0.393683	0.125577	3.13498	0.00171864	0.0144631	2L	retm
FBgn0030695	833.27	0.365992	0.116773	3.13421	0.00172317	0.0144797	X	PGRP-LE
FBgn0052100	281.167	-0.526506	0.167989	-3.13417	0.00172344	0.0144797	3L	CG32100
FBgn0035805	335.759	0.56855	0.18142	3.13389	0.00172503	0.0144812	3L	CG7506
FBgn0052313	200.519	0.595775	0.190179	3.13271	0.00173202	0.014528	3L	CG32313
FBgn0032295	668.843	-0.521614	0.166555	-3.13178	0.0017375	0.0145501	2L	CG12299
FBgn0036734	600.797	-0.433581	0.138444	-3.13181	0.00173733	0.0145501	3L	CG7564
FBgn0260938	1243.19	-0.285717	0.0912408	-3.13146	0.00173939	0.0145541	X	tay
FBgn0016701	725.087	-0.294643	0.0941378	-3.12991	0.00174858	0.0146072	2R	Rab4
FBgn0267365	466.27	0.562685	0.179766	3.1301	0.00174746	0.0146072	2L	l(2)SH0834
FBgn0030207	28.1217	1.33179	0.425541	3.12963	0.00175024	0.0146091	X	CG2887
FBgn0033891	179.896	-0.464971	0.148583	-3.12938	0.00175178	0.01461	2R	CG8067
FBgn0011290	509.531	-0.400583	0.12804	-3.12858	0.00175653	0.0146378	3R	Taf12
FBgn0031048	1225.3	-0.301886	0.0966161	-3.12459	0.00178051	0.0148255	X	CG12237
FBgn0038341	668.366	0.668686	0.214045	3.12404	0.00178387	0.0148414	3R	NA
FBgn0039849	644.435	-0.295261	0.0945394	-3.12316	0.00178923	0.0148619	3R	CG11334
FBgn0033635	59.9442	2.44635	0.783257	3.1233	0.00178833	0.0148619	2R	Prip
FBgn0036999	217.652	-0.635892	0.203696	-3.12177	0.00179768	0.01492	3L	isoQC
FBgn0034194	233.328	1.05179	0.336984	3.12118	0.00180127	0.0149377	2R	CG15611
FBgn0036826	236.297	-0.497088	0.159304	-3.12036	0.00180627	0.0149671	3L	arx
FBgn0038143	70.0737	0.953547	0.305733	3.11888	0.00181537	0.0150182	3R	CG9813
FBgn0033547	88.8757	-0.690954	0.221533	-3.11897	0.00181484	0.0150182	2R	CG12935
FBgn0033199	333.723	-0.570127	0.182908	-3.11702	0.00182686	0.0151011	2R	CG17985
FBgn0265045	67.8793	0.877177	0.281529	3.11576	0.00183473	0.0151539	2R	Strn-Mlck
FBgn0032054	240.654	-0.474535	0.152354	-3.11469	0.00184137	0.0151824	2L	Uba4
FBgn0267027	76.4	-0.640844	0.205762	-3.11449	0.00184263	0.0151824	2R	lncRNA:CR45471
FBgn0040805	12.3952	2.6125	0.838777	3.11465	0.0018416	0.0151824	3L	CG12355
FBgn0039955	2580.34	0.716695	0.230178	3.11365	0.00184786	0.0152133	3R	CG41099
FBgn0053017	9.25074	1.72165	0.553521	3.11036	0.00186859	0.0153636	2R	CG33017
FBgn0033468	648.953	0.428029	0.137618	3.11028	0.00186912	0.0153636	2R	CG1418
FBgn0036627	15.9674	2.92914	0.941933	3.10971	0.00187272	0.0153809	3L	Gagr
FBgn0030066	156.119	-0.538664	0.173296	-3.10836	0.00188131	0.0154144	X	Uros1
FBgn0036099	512.261	-0.357566	0.115021	-3.1087	0.00187916	0.0154144	3L	CG11811
FBgn0021800	26.5335	-1.32325	0.425689	-3.10849	0.00188047	0.0154144	2L	Reph
FBgn0031971	2682.37	-1.86856	0.601406	-3.10699	0.00189002	0.0154734	2L	Sirup
FBgn0028474	1091.43	-0.294311	0.0947748	-3.10537	0.00190043	0.0155462	X	CG4119
FBgn0032638	121.459	-1.19594	0.385176	-3.1049	0.00190341	0.0155582	2L	SPH93
FBgn0032727	708.005	0.553132	0.178326	3.1018	0.00192346	0.015697	2L	CG10623
FBgn0039068	93.4133	-1.07703	0.347216	-3.10192	0.00192273	0.015697	3R	CG13827
FBgn0033224	1026.15	-0.450487	0.145357	-3.09917	0.00194063	0.0158245	2R	Nop17l
FBgn0261530	1149.47	1.04122	0.33605	3.09841	0.0019456	0.0158525	3L	nbs
FBgn0053158	742.196	0.375022	0.12107	3.09757	0.00195116	0.0158852	3L	CG33158
FBgn0036668	1504.46	-0.36137	0.116716	-3.09616	0.00196045	0.0159481	3L	Zcchc7
FBgn0035371	5777.83	-0.281459	0.090915	-3.09584	0.00196255	0.0159525	3L	AhcyL1
FBgn0267505	245.617	0.712785	0.230272	3.09541	0.00196543	0.0159633	rDNA	pre-rRNA:CR45845
FBgn0032390	836.917	0.539216	0.174225	3.09495	0.00196847	0.0159753	2L	dgt2
FBgn0250788	7608.6	-0.418557	0.135281	-3.09398	0.00197491	0.0160149	X	beta-Spec
FBgn0002563	37.6157	-1.11584	0.360941	-3.09148	0.00199161	0.0161376	2L	Lsp1beta
FBgn0016078	250.488	0.638071	0.206485	3.09015	0.00200052	0.016197	2R	wun
FBgn0267693	149.303	-0.780339	0.252559	-3.08973	0.00200342	0.0162076	3R	asRNA:CR46029
FBgn0261588	148.731	1.156	0.374191	3.08933	0.00200609	0.0162164	2R	pdm3
FBgn0031321	1332.32	-0.256308	0.082975	-3.08898	0.00200845	0.0162227	2L	Tgt
FBgn0037653	848.752	-0.375156	0.121468	-3.08851	0.00201162	0.0162227	3R	Iru
FBgn0011640	1599.36	-0.349359	0.113107	-3.08875	0.00201004	0.0162227	3L	lark
FBgn0034398	10925.7	0.501923	0.162627	3.08633	0.00202641	0.0163292	2R	CG15098
FBgn0086687	8183.11	-0.452685	0.146686	-3.08609	0.00202806	0.0163296	3R	Desat1
FBgn0067779	496.245	0.557189	0.180626	3.08477	0.00203709	0.0163884	2L	dbr
FBgn0026181	1841.1	-0.347019	0.112502	-3.08456	0.00203855	0.0163884	X	Rok
FBgn0011236	855.211	0.327723	0.106316	3.08253	0.00205247	0.0164873	2R	ken
FBgn0037755	669.938	0.373894	0.121333	3.08154	0.0020593	0.0165146	3R	CG12945
FBgn0033733	5.60227	3.24779	1.05402	3.08134	0.0020607	0.0165146	2R	CG8834
FBgn0036368	244.401	-0.607792	0.197227	-3.08169	0.00205829	0.0165146	3L	CG10738
FBgn0004436	2703.2	0.517436	0.167982	3.0803	0.00206789	0.0165593	3R	Ubc6
FBgn0011655	685.6	-0.436241	0.141646	-3.0798	0.00207142	0.0165746	3R	Med
FBgn0037607	3556.83	-0.61724	0.200453	-3.07922	0.00207542	0.0165936	3R	CG8036
FBgn0051718	22.9006	1.26594	0.411398	3.07718	0.0020897	0.0166948	2L	Ir31a
FBgn0001250	65.147	1.67576	0.54478	3.07603	0.0020978	0.0167464	X	if
FBgn0052000	2243.16	0.530893	0.172718	3.07375	0.00211385	0.0168615	4	anne
FBgn0051174	42.4811	1.06851	0.347823	3.07199	0.00212637	0.0169482	3R	CG31174
FBgn0267814	3.6309	-4.35125	1.41685	-3.07109	0.00213282	0.0169863	3R	asRNA:CR46139
FBgn0031851	538.373	0.434817	0.141616	3.0704	0.00213775	0.0170123	2L	Aatf
FBgn0029606	13.9772	1.81167	0.590371	3.0687	0.00214995	0.0170962	X	CG14052
FBgn0039114	245.51	-0.403126	0.13139	-3.06816	0.00215383	0.0171138	3R	Lsd-1
FBgn0053181	44.8403	1.19086	0.388197	3.06768	0.00215729	0.017128	X	CG33181
FBgn0052668	29.4928	1.69085	0.551595	3.06539	0.00217386	0.0172462	X	CG32668
FBgn0052037	36.2403	-1.05215	0.343371	-3.06417	0.00218275	0.0173033	3L	CG32037
FBgn0085433	435.475	-0.708744	0.23138	-3.06311	0.00219047	0.0173511	3R	CG34404
FBgn0039417	206.417	0.888799	0.290354	3.06108	0.00220538	0.0174288	3R	CG6073
FBgn0050185	666.674	0.367528	0.120064	3.0611	0.00220524	0.0174288	2R	AIMP3
FBgn0036857	290.747	0.781417	0.255245	3.06144	0.00220278	0.0174288	3L	Aldh7A1
FBgn0037370	284.814	-0.420597	0.137504	-3.0588	0.00222226	0.0175487	3R	CG1236
FBgn0027087	2113.23	0.336348	0.109998	3.05778	0.00222984	0.0175949	X	HisRS
FBgn0265611	129.232	0.786373	0.25723	3.05708	0.00223506	0.017609	X	asRNA:CR44429
FBgn0035667	49.2713	2.10432	0.688306	3.05725	0.00223379	0.017609	3L	Jon65Ai
FBgn0000611	1454.88	0.401759	0.131452	3.05631	0.00224081	0.0176273	X	exd
FBgn0030349	950.345	-0.443918	0.145236	-3.05653	0.00223911	0.0176273	X	CG10353
FBgn0028369	200.546	0.814931	0.26694	3.05286	0.00226675	0.0178098	X	kirre
FBgn0043012	653.362	-0.550352	0.180295	-3.0525	0.0022694	0.0178098	3R	AP-2sigma
FBgn0029176	29143.2	-0.364918	0.119553	-3.05237	0.00227046	0.0178098	3R	eEF1gamma
FBgn0011824	938.184	0.481892	0.157878	3.0523	0.00227097	0.0178098	2R	CG4038
FBgn0038058	270.459	-0.396011	0.129858	-3.04957	0.0022917	0.0179586	3R	CG5608
FBgn0033728	16.3648	1.90131	0.623539	3.04922	0.00229435	0.0179657	2R	Cpr49Ae
FBgn0032149	298.644	0.68312	0.224221	3.04663	0.00231421	0.0180882	2L	CG4036
FBgn0052681	19.0042	2.09435	0.687462	3.04649	0.00231529	0.0180882	X	CG32681
FBgn0033483	428.251	1.17964	0.387201	3.04658	0.00231461	0.0180882	2R	egr
FBgn0036806	19.3923	2.10887	0.69295	3.04332	0.00233982	0.0182659	3L	Cyp12c1
FBgn0011725	885.07	-0.469469	0.154284	-3.04289	0.00234317	0.0182781	3R	twin
FBgn0000008	58.6745	1.00961	0.331915	3.04177	0.00235191	0.0183324	2R	a
FBgn0001311	4.42518	4.05583	1.33449	3.03924	0.00237178	0.0184365	3R	kkv
FBgn0051674	69.5271	0.754731	0.2483	3.03959	0.00236901	0.0184365	2L	CG31674
FBgn0265873	102.839	-0.797304	0.262335	-3.03926	0.00237163	0.0184365	X	lncRNA:CR44662
FBgn0266697	80.2205	0.709846	0.233567	3.03915	0.00237247	0.0184365	3R	lncRNA:CR45187
FBgn0030099	400.768	-0.722015	0.237611	-3.03865	0.00237643	0.0184533	X	CG12056
FBgn0032715	116.597	-0.62928	0.207209	-3.03694	0.00238992	0.0185441	2L	CG17597
FBgn0031263	4409.79	-0.791343	0.260637	-3.03619	0.00239591	0.0185764	2L	Tspo
FBgn0039911	30.2405	1.18654	0.390897	3.03544	0.00240187	0.0186086	4	CG1909
FBgn0027567	1401.7	-0.971135	0.320046	-3.03436	0.00241044	0.0186609	3L	CG8108
FBgn0265613	4.72314	2.79127	0.920311	3.03297	0.0024216	0.018719	X	asRNA:CR44431
FBgn0035911	182.06	-0.889569	0.293298	-3.03299	0.00242141	0.018719	3L	CG6638
FBgn0033215	29.2708	1.56231	0.51515	3.03272	0.00242359	0.0187202	2R	Dgat2
FBgn0259705	121.509	0.956191	0.315546	3.03027	0.00244336	0.0188587	3R	CG42359
FBgn0020377	16.6571	-2.82868	0.934655	-3.02644	0.0024745	0.0190848	2R	Sr-CII
FBgn0026197	82.9532	0.821812	0.27157	3.02615	0.00247691	0.019089	3L	lncRNA:noe
FBgn0039494	838.401	-0.606093	0.200342	-3.0253	0.00248389	0.0191284	3R	grass
FBgn0034095	69.73	1.10681	0.365992	3.02415	0.00249336	0.0191869	2R	CG15701
FBgn0030607	225.79	-0.571062	0.188963	-3.02208	0.00251045	0.0193039	X	dob
FBgn0037561	239.448	-0.457446	0.151443	-3.02057	0.00252296	0.019365	3R	CG9630
FBgn0030598	18.9102	-1.57069	0.520019	-3.02044	0.00252406	0.019365	X	CG9503
FBgn0036266	286.338	0.388693	0.128681	3.02058	0.00252292	0.019365	3L	CG5626
FBgn0040005	1267.23	0.364801	0.120859	3.01841	0.00254107	0.0194809	2R	CG17883
FBgn0260962	3133.56	0.366618	0.12147	3.01817	0.00254303	0.0194813	3R	pic
FBgn0001179	457.942	0.427424	0.141657	3.01732	0.00255018	0.0195215	3L	hay
FBgn0005638	19.6678	1.84811	0.612694	3.01637	0.00255821	0.0195684	2R	slbo
FBgn0004629	1882.3	1.07152	0.355286	3.01592	0.00256197	0.0195826	3R	Cys
FBgn0033649	115.434	0.82331	0.273073	3.01498	0.00256996	0.019629	2R	pyr
FBgn0265048	2920.74	-0.802737	0.26628	-3.01464	0.00257287	0.0196366	3R	cv-d
FBgn0039739	2.60613	4.48907	1.48928	3.01425	0.00257615	0.019647	3R	RpS28a
FBgn0002036	108.245	-0.548887	0.182156	-3.01328	0.00258438	0.0196804	2L	CG10561
FBgn0034215	702.325	-0.513759	0.170489	-3.01345	0.00258297	0.0196804	2R	Mtap
FBgn0034392	232.128	-0.637099	0.211631	-3.01042	0.00260884	0.0198421	2R	MFS15
FBgn0085423	1207.16	0.414473	0.137683	3.01035	0.00260947	0.0198421	2L	GramD1B
FBgn0030060	714.019	-0.620691	0.206279	-3.00899	0.00262115	0.0198719	X	CG2004
FBgn0039757	37190.2	-0.295472	0.0981867	-3.00929	0.00261859	0.0198719	3R	RpS7
FBgn0039959	3431.97	-0.622053	0.206728	-3.00904	0.00262078	0.0198719	3L	CG17514
FBgn0267995	8.20224	2.12611	0.706447	3.00958	0.00261607	0.0198719	2L	asRNA:CR46262
FBgn0029706	880.957	-0.367802	0.122262	-3.00832	0.00262695	0.0199011	X	CG3626
FBgn0035283	264.326	-0.616702	0.205189	-3.00554	0.0026511	0.0200544	3L	CG12024
FBgn0035916	189.424	-0.437655	0.145608	-3.00571	0.00264962	0.0200544	3L	GAPsec
FBgn0032196	548.629	0.429843	0.143037	3.00513	0.00265471	0.0200669	2L	CG5708
FBgn0038861	155.595	-0.511426	0.170288	-3.0033	0.00267073	0.0201732	3R	CG7009
FBgn0039881	27.1614	-1.07206	0.357214	-3.00119	0.0026893	0.0202985	3R	CG1971
FBgn0028506	1358.88	-0.428423	0.142785	-3.00048	0.0026955	0.0203216	2L	CG4455
FBgn0267456	36.1948	1.06977	0.356545	3.00039	0.00269633	0.0203216	3L	asRNA:CR45806
FBgn0015575	156.194	2.66878	0.8896	2.99998	0.00269997	0.0203341	3R	alpha-Est7
FBgn0050489	24.3137	1.47244	0.491116	2.99816	0.00271613	0.0204408	2R	Cyp12d1-p
FBgn0033400	358.088	0.483339	0.16125	2.99744	0.00272254	0.020459	2R	CG2063
FBgn0265574	925.968	-0.326928	0.109062	-2.99764	0.00272076	0.020459	3L	Cdc5
FBgn0039993	1969.47	-0.3469	0.115774	-2.99635	0.00273235	0.0205177	2R	CG17691
FBgn0034595	52.2118	1.35379	0.451881	2.9959	0.00273641	0.0205331	2R	CG15657
FBgn0032321	530.066	-0.335627	0.112039	-2.99563	0.00273876	0.0205357	2L	YL-1
FBgn0265000	2.73271	4.41106	1.47321	2.99417	0.00275189	0.0206191	2L	lncRNA:CR44151
FBgn0037998	563.67	-0.381114	0.127327	-2.99319	0.00276081	0.0206708	3R	Cog1
FBgn0086768	815.198	-0.447977	0.149705	-2.99239	0.00276801	0.0207096	3R	Pcmt
FBgn0032421	210.799	0.608505	0.203415	2.99145	0.00277654	0.0207522	2L	crok
FBgn0250816	1486.14	-0.713823	0.238632	-2.99132	0.00277775	0.0207522	3L	AGO3
FBgn0038922	1142.62	-0.297948	0.0996272	-2.99063	0.002784	0.0207837	3R	Idh3b
FBgn0085612	16.4985	1.65554	0.553633	2.99032	0.00278684	0.0207897	3L	CR41320
FBgn0058191	1173.22	0.392039	0.131235	2.98731	0.00281449	0.0209807	2R	CG40191
FBgn0033431	467.503	-0.789005	0.264182	-2.98659	0.00282104	0.020999	2R	CG1827
FBgn0085400	26.6558	1.58216	0.529716	2.9868	0.00281914	0.020999	2R	side-V
FBgn0031298	992.791	-0.376127	0.125978	-2.98566	0.00282965	0.0210478	2L	Atg4a
FBgn0037466	562.35	-0.314426	0.105346	-2.9847	0.00283852	0.0210985	3R	CG1965
FBgn0039212	370.974	0.515777	0.172839	2.98415	0.00284366	0.0211214	3R	Syx18
FBgn0036381	16.4378	-2.19802	0.736767	-2.98333	0.0028513	0.0211628	3L	CG8745
FBgn0000303	14.2569	1.84768	0.619416	2.98294	0.00285493	0.0211744	3R	ChAT
FBgn0027885	2886.44	-0.380092	0.127496	-2.98121	0.00287112	0.0212791	2L	NA
FBgn0030545	355.388	0.592292	0.198757	2.97999	0.00288261	0.0213488	X	CG11590
FBgn0004926	4968.46	0.369953	0.124172	2.97937	0.00288844	0.0213765	3L	eIF2beta
FBgn0038400	1283.74	0.499704	0.167748	2.9789	0.00289286	0.0213938	3R	CG5903
FBgn0035443	241.6	-0.40046	0.134624	-2.97466	0.00293317	0.0216763	3L	CG12010
FBgn0030391	350.458	0.395724	0.133072	2.97376	0.00294175	0.021724	X	Rab40
FBgn0263241	696.068	1.04227	0.350526	2.97343	0.0029449	0.0217316	3L	Mocs1
FBgn0023521	90.5899	-0.629575	0.211801	-2.97248	0.00295404	0.0217834	X	CG3587
FBgn0029891	872.98	-0.265948	0.0895533	-2.96972	0.00298072	0.0219643	X	Pink1
FBgn0034110	390.749	-0.521542	0.175643	-2.96934	0.00298444	0.0219759	2R	Atg9
FBgn0035085	412.476	-0.561122	0.189209	-2.96562	0.00302073	0.0222272	2R	CG3770
FBgn0053558	457.714	-0.35019	0.118122	-2.96465	0.00303029	0.0222816	2R	mim
FBgn0037975	502.016	1.87162	0.631449	2.96401	0.00303654	0.0223115	3R	CG3397
FBgn0039862	23.8526	1.38064	0.466533	2.95935	0.00308286	0.0226356	3R	kek6
FBgn0263049	5.5311	3.10574	1.05045	2.95658	0.00311068	0.0228103	2L	lncRNA:let7C
FBgn0031002	188.02	1.40703	0.475904	2.95654	0.00311111	0.0228103	X	CG14196
FBgn0033717	3974.81	0.492736	0.16676	2.95476	0.0031291	0.0229258	2R	CG8839
FBgn0033551	702.858	-0.314613	0.10655	-2.95271	0.00314997	0.0230458	2R	CG7222
FBgn0003557	1470.09	-0.367429	0.124435	-2.95278	0.00314931	0.0230458	2L	Su(dx)
FBgn0026679	942.597	-0.461183	0.156274	-2.95111	0.00316638	0.0231494	X	IntS4
FBgn0037364	321.332	0.575239	0.195036	2.9494	0.00318395	0.0232612	3R	Rab23
FBgn0035515	628.12	-0.401061	0.135993	-2.94913	0.00318665	0.0232643	3L	CG14997
FBgn0037654	150.38	0.719345	0.243958	2.94864	0.00319176	0.0232851	3R	CG11983
FBgn0030853	726.307	-0.26903	0.0912636	-2.94784	0.00320006	0.0233291	X	ND-24
FBgn0086253	699.033	-0.513655	0.174325	-2.94654	0.00321352	0.0234105	3R	rumi
FBgn0026417	361.309	0.716569	0.243255	2.94575	0.00322175	0.0234538	3R	Hus1-like
FBgn0039130	1064.97	-0.387545	0.131571	-2.94552	0.00322409	0.0234541	3R	CG5854
FBgn0051109	125.857	-0.545159	0.185217	-2.94335	0.00324681	0.0236027	3R	CG31109
FBgn0260817	408.518	0.377867	0.128411	2.94263	0.00325433	0.0236406	2L	gkt
FBgn0032596	1700.03	0.437451	0.148684	2.94216	0.00325927	0.0236597	2L	Prosbeta4
FBgn0024846	678.4	-0.28668	0.0974709	-2.94119	0.00326959	0.0237178	2L	p38b
FBgn0035830	1015.5	0.640159	0.217872	2.93824	0.00330082	0.0239275	3L	CG8209
FBgn0034879	457.457	-0.388229	0.132202	-2.93663	0.00331804	0.0240353	2R	Rrp4
FBgn0026393	89.3003	-0.616096	0.209927	-2.93481	0.00333749	0.0241526	2R	Or43b
FBgn0053221	13.22	1.78452	0.608079	2.93468	0.00333895	0.0241526	X	CR33221
FBgn0031813	185.292	-0.516346	0.176123	-2.93174	0.00337066	0.0243648	2L	CG9527
FBgn0031450	790.472	-0.332254	0.113372	-2.93066	0.00338241	0.0244325	2L	Hrs
FBgn0051064	400.294	-0.62106	0.211962	-2.93005	0.00338906	0.0244612	3R	CG31064
FBgn0086361	4759.29	0.314375	0.107303	2.92978	0.00339205	0.0244612	3R	alph
FBgn0035059	173.114	-0.496909	0.169614	-2.92964	0.00339355	0.0244612	2R	CG3894
FBgn0050380	13.0317	1.73269	0.591531	2.92915	0.00339886	0.0244823	2R	CG30380
FBgn0036395	86.3326	-0.574471	0.196221	-2.92767	0.00341513	0.0245823	3L	CG17361
FBgn0035518	257.092	-0.464522	0.15876	-2.92594	0.00343413	0.0247016	3L	CG15011
FBgn0035121	3806.09	-0.402624	0.137675	-2.92446	0.00345058	0.0248026	3L	Tudor-SN
FBgn0038418	147.74	-0.452348	0.154797	-2.92219	0.00347576	0.024966	3R	pad
FBgn0033584	533.726	-0.800224	0.273934	-2.92123	0.00348651	0.0250257	2R	CG7737
FBgn0030410	67.3612	-0.710259	0.243435	-2.91765	0.00352681	0.0252973	X	Aven
FBgn0032233	215.217	-0.513631	0.176153	-2.91583	0.00354747	0.0254099	2L	dpr19
FBgn0261599	31698.1	-0.53153	0.18229	-2.91585	0.0035472	0.0254099	3R	RpS29
FBgn0037440	208.464	-0.505079	0.173293	-2.91459	0.00356159	0.0254933	3R	CRAT
FBgn0024361	70.606	-0.973458	0.334024	-2.91434	0.00356442	0.0254957	X	Tsp2A
FBgn0260431	151.572	0.522066	0.179236	2.91273	0.00358281	0.0255812	3L	CG42526
FBgn0262515	2343.27	-0.299529	0.102826	-2.91295	0.0035803	0.0255812	2R	VhaAC45
FBgn0264265	10.8231	2.04018	0.700457	2.91264	0.00358386	0.0255812	2L	lncRNA:CR43765
FBgn0033134	2702.39	0.689717	0.236939	2.91095	0.00360334	0.0257023	2R	Tsp42El
FBgn0001991	55.4588	1.24384	0.427525	2.9094	0.00362125	0.0258121	2L	Ca-alpha1D
FBgn0053182	181.196	-0.672709	0.231355	-2.90769	0.00364105	0.0259352	2R	Kdm4B
FBgn0037028	1009.23	0.504487	0.173559	2.90672	0.00365244	0.0259764	3L	CG3618
FBgn0030343	720.862	-0.468785	0.161279	-2.90667	0.00365303	0.0259764	X	ATP7
FBgn0036623	720.763	-0.508124	0.17482	-2.90655	0.00365443	0.0259764	3L	Agpat3
FBgn0037064	7.95047	-1.96051	0.675555	-2.90207	0.00370704	0.026332	3L	CG9389
FBgn0031836	1823.18	-0.537184	0.185247	-2.89982	0.00373371	0.0265032	2L	CG11050
FBgn0038606	338.323	0.932434	0.321592	2.89943	0.00373839	0.026518	3R	CG15803
FBgn0029932	4.40077	3.83245	1.32225	2.89842	0.0037505	0.0265855	X	CG4607
FBgn0266275	26.793	1.28232	0.442536	2.89767	0.00375947	0.0266307	X	asRNA:CR44960
FBgn0037574	162.332	-0.467867	0.161568	-2.8958	0.00378194	0.0267529	3R	Coq2
FBgn0020379	173.881	0.512664	0.177026	2.89598	0.00377981	0.0267529	3R	Rfx
FBgn0051612	30.9094	-0.934077	0.322802	-2.89365	0.00380791	0.026918	2L	CG31612
FBgn0005558	4.14777	3.54585	1.2256	2.89316	0.00381386	0.0269377	4	ey
FBgn0035231	101.347	-0.783366	0.270781	-2.89299	0.00381595	0.0269377	3L	Pcyt2
FBgn0085242	69.9178	-0.780143	0.269698	-2.89266	0.00382	0.0269477	2R	CG34213
FBgn0005616	140.264	-0.602827	0.208489	-2.89141	0.0038352	0.0270363	2L	msl-2
FBgn0033615	402.8	0.415677	0.143871	2.88924	0.0038617	0.0272044	2R	CG7741
FBgn0034275	4.70019	2.99786	1.03782	2.88861	0.00386943	0.0272401	2R	CG5002
FBgn0032228	322.275	0.471979	0.163492	2.88686	0.00389105	0.0273735	2L	CG5367
FBgn0030088	252.006	-0.375677	0.130162	-2.88623	0.00389885	0.0274096	X	Arfrp1
FBgn0036552	13.5051	2.03197	0.704167	2.88563	0.00390629	0.0274431	3L	CG17028
FBgn0037538	378.118	0.345582	0.119927	2.88161	0.00395653	0.0277591	3R	CG3223
FBgn0040290	591.246	-0.340831	0.118279	-2.88159	0.00395669	0.0277591	3L	RecQ4
FBgn0053461	42.1842	3.24389	1.12584	2.8813	0.00396038	0.027766	2R	CG33461
FBgn0030067	602.841	0.50178	0.174187	2.8807	0.00396791	0.0277808	X	Rbm13
FBgn0264703	41.4975	0.773975	0.268656	2.88091	0.00396525	0.0277808	3L	CR43972
FBgn0039002	29.018	1.00173	0.34777	2.88045	0.0039711	0.0277841	3R	CG17625
FBgn0034442	48.1269	-0.914364	0.317562	-2.87933	0.00398524	0.0278471	2R	CG11257
FBgn0033757	309.147	-0.588301	0.204321	-2.8793	0.00398553	0.0278471	2R	muskelin
FBgn0261999	8.64434	1.84426	0.641217	2.87618	0.00402517	0.0281049	2L	Ca-Ma2d
FBgn0039531	117.978	-0.675048	0.234858	-2.87428	0.00404954	0.0282558	3R	CG5611
FBgn0053054	109.775	-1.39633	0.485971	-2.87327	0.00406244	0.0283265	3L	CG33054
FBgn0032402	331.361	0.859535	0.299262	2.87218	0.00407649	0.0284052	2L	CG14945
FBgn0026238	1096.79	0.404269	0.140866	2.86988	0.0041063	0.0285934	2R	gus
FBgn0021767	116.619	0.981603	0.342228	2.86827	0.00412722	0.02871	X	org-1
FBgn0030735	609.544	-0.374202	0.130468	-2.86816	0.00412864	0.02871	X	CG3632
FBgn0050296	86.8279	0.852225	0.297308	2.86647	0.0041508	0.0288445	2R	RIC-3
FBgn0028479	1196.21	-0.483964	0.168889	-2.86557	0.00416263	0.0288824	2L	Mtpalpha
FBgn0086613	513.942	-0.366697	0.127974	-2.86541	0.0041647	0.0288824	3R	Ino80
FBgn0031478	263.224	-0.36898	0.12876	-2.86565	0.0041615	0.0288824	2L	CG8814
FBgn0023477	2077.6	-0.336009	0.117351	-2.86328	0.00419283	0.0290578	2R	Taldo
FBgn0039316	86.7718	1.22473	0.427901	2.86219	0.0042073	0.0291384	3R	CG11893
FBgn0026090	323.024	-0.361398	0.126303	-2.86136	0.00421823	0.0291747	X	CG14812
FBgn0052641	70.7607	0.740001	0.258611	2.86145	0.00421713	0.0291747	X	CG32641
FBgn0020278	3527.06	0.40765	0.142539	2.85992	0.0042375	0.0292882	3R	loco
FBgn0029849	505.611	-0.660986	0.231177	-2.85922	0.00424681	0.0293328	X	Efr
FBgn0029502	419.775	-0.469797	0.164382	-2.85795	0.00426382	0.0294304	X	Coq7
FBgn0039625	563.338	-0.477063	0.16721	-2.85308	0.00432981	0.029863	3R	beta4GalNAcTB
FBgn0030512	408.932	-0.397028	0.139167	-2.85289	0.00433232	0.029863	X	Nadsyn
FBgn0032819	388.946	0.418408	0.146724	2.85167	0.00434906	0.0299583	2L	CG10463
FBgn0038912	639.161	0.62197	0.218214	2.85027	0.00436821	0.030032	3R	CG6656
FBgn0263766	130.448	0.804297	0.282206	2.85003	0.00437147	0.030032	2L	asRNA:CR43683
FBgn0029148	991.343	0.764206	0.26814	2.85003	0.00437149	0.030032	3L	NHP2
FBgn0031319	847.213	-0.274414	0.0962775	-2.85024	0.00436859	0.030032	2L	CG4896
FBgn0033710	11.179	2.37307	0.832865	2.84929	0.00438169	0.030082	2R	CG17739
FBgn0030648	1096.34	-0.406755	0.14278	-2.84883	0.00438807	0.0301056	X	CG6340
FBgn0035632	216.785	-0.428216	0.150414	-2.84691	0.00441454	0.0302669	3L	Ppat-Dpck
FBgn0033754	119.493	0.597876	0.210026	2.84668	0.0044178	0.030269	2R	Ak6
FBgn0004841	4.16606	3.53594	1.24266	2.84546	0.00443479	0.0303651	3R	TkR86C
FBgn0034792	1276.55	-0.418697	0.147208	-2.84426	0.00445148	0.0304534	2R	YME1L
FBgn0010350	622.211	-0.35732	0.125635	-2.84411	0.00445363	0.0304534	3L	Cds
FBgn0085468	635.826	-0.383442	0.134858	-2.8433	0.00446495	0.0305105	2R	ND-MWFE
FBgn0051716	1273.47	-0.269145	0.0947043	-2.84195	0.00448381	0.030619	2L	Cnot4
FBgn0037011	626.712	0.574153	0.202109	2.84081	0.00449989	0.0306573	3L	CG4858
FBgn0039228	7.50094	2.14641	0.755478	2.84113	0.00449544	0.0306573	3R	CG6980
FBgn0270927	582.743	-0.553169	0.19473	-2.84071	0.00450138	0.0306573	3R	betaGlu
FBgn0035468	11.1355	2.5428	0.895095	2.84081	0.00449989	0.0306573	3L	Gr63a
FBgn0031379	767.926	-0.343461	0.120982	-2.83895	0.00452624	0.0308061	2L	CG7289
FBgn0039386	11.9666	1.57614	0.555274	2.83849	0.00453278	0.0308301	3R	CG5948
FBgn0032901	95.6547	-0.637075	0.22453	-2.83737	0.00454862	0.0309059	2L	sky
FBgn0050163	7.87286	2.02732	0.714528	2.83728	0.00454995	0.0309059	2R	Cpr60D
FBgn0029969	394.994	-0.499215	0.175979	-2.83678	0.00455706	0.0309337	X	CG10932
FBgn0017558	418.267	-0.43741	0.15422	-2.83627	0.00456436	0.0309627	2R	Pdk
FBgn0031003	409.663	0.426893	0.150688	2.83296	0.00461191	0.0312646	X	CG7889
FBgn0039229	1176.41	-0.355869	0.125639	-2.83247	0.00461894	0.0312916	3R	Saf-B
FBgn0022344	377.451	0.470893	0.166274	2.83203	0.00462531	0.0312934	3R	CG10340
FBgn0030520	9711.25	-0.917304	0.323879	-2.83224	0.00462231	0.0312934	X	Pdcd4
FBgn0051633	156.272	0.831312	0.293565	2.83178	0.00462894	0.031295	2L	CG31633
FBgn0030015	1.66722	4.59106	1.62137	2.83159	0.00463166	0.031295	X	CG10761
FBgn0264272	21.2692	1.89909	0.670793	2.83111	0.00463875	0.0313222	3L	mwh
FBgn0034971	1067.58	-0.40432	0.142879	-2.82981	0.00465757	0.0314287	2R	Gpat4
FBgn0031022	342.15	-0.47892	0.169368	-2.82769	0.00468845	0.0316162	X	CG12204
FBgn0264707	502.138	0.546529	0.193309	2.82723	0.00469525	0.0316412	3L	RhoGEF3
FBgn0023489	22.1131	1.29555	0.458327	2.82671	0.00470296	0.0316723	2L	Pph13
FBgn0087039	309.248	0.465362	0.164695	2.8256	0.00471915	0.0317605	3L	Sbp2
FBgn0001125	1982	-0.487232	0.172484	-2.82479	0.00473111	0.0318201	2L	Got2
FBgn0037026	730.951	-0.306522	0.108564	-2.82342	0.00475141	0.0319299	3L	CG3634
FBgn0035167	116.444	-0.748269	0.265036	-2.82327	0.00475366	0.0319299	3L	Gr61a
FBgn0033669	1833.6	0.322224	0.114186	2.82191	0.00477379	0.0320441	2R	PI31
FBgn0032876	823.34	0.270837	0.0959845	2.82168	0.00477734	0.0320469	2L	Cen
FBgn0037645	11.6046	2.08062	0.737442	2.8214	0.00478149	0.0320538	3R	NA
FBgn0051108	361.104	0.416833	0.147794	2.82036	0.00479699	0.0321367	3R	TTLL5
FBgn0036030	1552.72	-0.497637	0.176467	-2.82	0.0048024	0.032152	3L	CG6767
FBgn0034718	134.045	-1.23983	0.439745	-2.81942	0.00481101	0.0321886	2R	wdp
FBgn0030447	72.4454	-0.764243	0.271148	-2.81854	0.00482423	0.0322559	X	CG2200
FBgn0030994	93.6364	1.14059	0.404859	2.81724	0.00484383	0.0323659	X	HP1D3csd
FBgn0032916	332.542	-0.485646	0.17245	-2.81616	0.00486018	0.0324328	2L	CG9257
FBgn0034182	75.5722	0.611697	0.217194	2.81637	0.00485704	0.0324328	2R	SmydA-7
FBgn0003169	692.635	-0.379399	0.134768	-2.81519	0.00487479	0.0325092	3R	put
FBgn0031053	335.32	0.611785	0.217342	2.81484	0.00488013	0.0325237	X	CG14223
FBgn0031099	170.162	-0.694804	0.246913	-2.81396	0.00489347	0.0325913	X	CG17065
FBgn0040251	164.957	1.8818	0.669428	2.81106	0.00493783	0.0328228	3R	Ugt302K1
FBgn0034674	991.798	0.531974	0.18922	2.8114	0.00493267	0.0328228	2R	CG9304
FBgn0033367	70.3934	2.60188	0.92554	2.8112	0.00493573	0.0328228	2R	PPO2
FBgn0052719	13.6159	1.63663	0.582289	2.81069	0.00494359	0.0328398	X	CG32719
FBgn0261671	1306.73	-0.330622	0.117652	-2.81017	0.00495147	0.0328709	2L	tweek
FBgn0264607	2754.47	0.599843	0.213488	2.80972	0.00495846	0.032896	4	CaMKII
FBgn0031683	180.256	-0.547082	0.194764	-2.80895	0.00497033	0.0329533	2L	CG4230
FBgn0033755	1563.47	-0.400083	0.142455	-2.80848	0.00497758	0.0329653	2R	ClC-b
FBgn0031589	1384.11	-0.459421	0.163587	-2.80842	0.00497857	0.0329653	2L	Naprt
FBgn0004924	3298.74	-0.409567	0.145865	-2.80785	0.00498737	0.0330023	X	Top1
FBgn0030938	30.4541	-0.895215	0.318889	-2.80729	0.00499604	0.0330384	X	CG15047
FBgn0033756	1705.16	0.765434	0.272727	2.80659	0.00500684	0.0330884	2R	CG17760
FBgn0033372	230.819	-0.451954	0.161077	-2.80583	0.00501873	0.0331456	2R	CG13742
FBgn0015834	3098.95	-0.373991	0.133317	-2.80529	0.00502721	0.0331509	2L	eIF3i
FBgn0265194	741.253	-0.486111	0.173292	-2.80516	0.00502923	0.0331509	2R	Trpm
FBgn0265340	56.6739	0.979888	0.349292	2.80536	0.0050261	0.0331509	2R	lncRNA:CR44294
FBgn0031759	1932.39	-0.24086	0.0858751	-2.80477	0.00503522	0.0331591	2L	lid
FBgn0037448	163.405	2.18636	0.779604	2.80445	0.00504018	0.0331591	3R	CG15186
FBgn0086608	9.98669	-1.68842	0.602047	-2.80446	0.00504009	0.0331591	3R	CG34112
FBgn0032244	423.634	0.516039	0.184125	2.80265	0.0050684	0.0333234	2L	RfC3
FBgn0038053	393.559	-0.496391	0.177274	-2.80014	0.0051081	0.0335629	3R	CG18549
FBgn0036142	101.644	-0.625281	0.223326	-2.79986	0.00511241	0.0335697	3L	CG7616
FBgn0265068	165.539	0.833317	0.297658	2.79958	0.00511698	0.0335782	3R	asRNA:CR44179
FBgn0039756	123.689	1.41479	0.50553	2.79862	0.00513211	0.0336559	3R	CG9743
FBgn0041100	73.4052	-0.631162	0.225555	-2.79826	0.00513788	0.0336722	3L	park
FBgn0002622	26426.2	-0.338089	0.120909	-2.79622	0.00517041	0.0338637	3R	RpS3
FBgn0010438	1037.69	0.440775	0.157684	2.79531	0.00518498	0.0339158	3R	mtSSB
FBgn0034935	327.115	0.456851	0.163434	2.79533	0.00518468	0.0339158	2R	Orcokinin
FBgn0037856	278.302	0.521661	0.186643	2.79496	0.00519063	0.0339311	3R	Leash
FBgn0037239	1041.96	0.880607	0.315105	2.79464	0.0051957	0.0339426	3R	Sfxn1-3
FBgn0038516	733.825	0.516258	0.184788	2.79378	0.00520957	0.03401	3R	P5cr-2
FBgn0038638	69.5247	-0.837917	0.299943	-2.79359	0.00521265	0.03401	3R	CG7702
FBgn0033451	431.891	-0.405756	0.145258	-2.79335	0.00521648	0.0340133	2R	Marc
FBgn0039698	257.21	-0.402369	0.144098	-2.79233	0.00523304	0.0340996	3R	CG7789
FBgn0036187	403.007	0.673631	0.241354	2.79105	0.00525366	0.0342122	3L	RIOK1
FBgn0037225	19.351	1.60889	0.576578	2.7904	0.00526423	0.0342158	3R	TwdlG
FBgn0032848	605.39	0.573581	0.205546	2.79052	0.00526235	0.0342158	2L	nesd
FBgn0053099	20.6335	1.29307	0.4634	2.79041	0.00526419	0.0342158	3R	CG33099
FBgn0001098	7958.8	-0.505289	0.181133	-2.7896	0.00527728	0.0342789	3R	Gdh
FBgn0266727	3.58864	3.86679	1.38734	2.7872	0.0053166	0.0345124	4	lncRNA:CR45200
FBgn0036117	165.5	-0.458143	0.164454	-2.78585	0.00533879	0.0346345	3L	CG6321
FBgn0266417	449.014	1.15282	0.413881	2.7854	0.00534625	0.034661	3L	ringer
FBgn0261446	7.66946	2.85758	1.02701	2.78243	0.00539533	0.0349571	X	CG13377
FBgn0032772	22.8821	1.36901	0.492198	2.78142	0.00541223	0.0349782	2L	CG17350
FBgn0038877	444.133	-0.437666	0.157336	-2.78172	0.00540714	0.0349782	3R	CG3308
FBgn0039153	343.545	-0.446354	0.160463	-2.78167	0.00540808	0.0349782	3R	GatB
FBgn0031183	525.881	0.42369	0.152324	2.78151	0.00541068	0.0349782	X	CG14621
FBgn0262965	2.51378	4.41434	1.58733	2.78099	0.00541931	0.0350018	2R	CR43276
FBgn0032519	269.273	-0.733996	0.264196	-2.77823	0.00546565	0.0352789	2L	CG16957
FBgn0027094	3858.81	0.298716	0.107584	2.77659	0.00549331	0.0354352	2L	AlaRS
FBgn0037350	51.9114	0.791316	0.285171	2.77489	0.00552212	0.0355711	3R	CG2911
FBgn0037829	12.0676	1.83392	0.660987	2.77452	0.00552828	0.0355711	3R	CG14691
FBgn0039627	475.473	0.480755	0.173266	2.77466	0.00552598	0.0355711	3R	CG11837
FBgn0011592	1699.22	-0.693763	0.250038	-2.77463	0.0055265	0.0355711	2R	fra
FBgn0265726	23.404	1.60972	0.580594	2.77255	0.00556196	0.0357654	X	Nna1
FBgn0037583	892.998	-0.362662	0.130871	-2.77114	0.00558612	0.0358758	3R	CG9684
FBgn0260722	167.443	-0.574965	0.207473	-2.77127	0.00558378	0.0358758	3R	lncRNA:CR42549
FBgn0004404	4469.9	-0.486742	0.17585	-2.76793	0.00564129	0.0362074	X	RpS14b
FBgn0037293	469.144	0.430074	0.155533	2.76516	0.00568949	0.0364483	3R	CG12007
FBgn0085436	8277.21	0.347665	0.125727	2.76522	0.00568839	0.0364483	2R	Not1
FBgn0035044	161.392	0.573766	0.207479	2.76542	0.00568501	0.0364483	2R	CG3663
FBgn0261597	36305.5	-0.24018	0.086871	-2.76478	0.00569603	0.0364674	2L	RpS26
FBgn0085317	96.018	0.750592	0.271537	2.76423	0.00570565	0.0365062	3R	CG34288
FBgn0038612	2529.01	0.491723	0.177904	2.76397	0.00571028	0.036513	3R	cona
FBgn0010482	101.777	0.832811	0.301432	2.76285	0.00572995	0.0365829	2R	l(2)01289
FBgn0033178	458.244	-0.467151	0.16909	-2.76274	0.00573192	0.0365829	2R	CG11127
FBgn0030854	1436.32	-0.28903	0.104603	-2.76311	0.00572527	0.0365829	X	CG8289
FBgn0025336	400.329	-0.366996	0.132943	-2.76054	0.00577055	0.0368066	2R	CG4882
FBgn0030724	710.762	-0.306867	0.111174	-2.76025	0.00577577	0.036817	X	Nipsnap
FBgn0037489	633.175	0.415146	0.150421	2.7599	0.00578191	0.0368332	3R	CG1234
FBgn0037071	579.201	0.487287	0.176685	2.75795	0.00581652	0.0370158	3L	CG7632
FBgn0011708	804.602	-0.343074	0.124402	-2.75779	0.00581941	0.0370158	2L	Syx5
FBgn0266284	692.775	0.424814	0.154048	2.75767	0.00582141	0.0370158	X	Ns3
FBgn0032652	14.3804	3.61324	1.31057	2.757	0.00583339	0.037069	2L	CG6870
FBgn0034230	1514.07	-0.339847	0.123279	-2.75672	0.0058384	0.0370778	2R	CG4853
FBgn0261108	747.653	-0.506174	0.183842	-2.75331	0.00589953	0.0374428	3R	Atg13
FBgn0050413	6.10457	2.5683	0.932998	2.75274	0.0059098	0.0374848	2R	CG30413
FBgn0036821	17.5617	-1.27576	0.463745	-2.75099	0.0059415	0.0376626	3L	CG3961
FBgn0051465	18.6528	1.75496	0.638013	2.75066	0.00594745	0.037677	3R	CG31465
FBgn0083960	14.3424	1.53525	0.558394	2.74941	0.00597024	0.037798	2L	CG34124
FBgn0031969	1877.95	0.476072	0.173171	2.74914	0.0059751	0.0378054	2L	pes
FBgn0028992	903.409	-0.313971	0.114218	-2.74887	0.00598005	0.0378134	3R	sds22
FBgn0036433	11.8715	1.44835	0.526984	2.74838	0.00598911	0.0378473	3L	CG9628
FBgn0028499	213.804	0.861952	0.313721	2.74752	0.00600484	0.0379234	3R	CG7985
FBgn0029986	49.0217	-0.958069	0.34882	-2.7466	0.00602167	0.0379829	X	CG15332
FBgn0265715	156.82	-1.21634	0.442825	-2.74677	0.00601848	0.0379829	3L	lncRNA:CR44522
FBgn0034117	582.013	0.550424	0.200469	2.74569	0.00603838	0.0380519	2R	CG7997
FBgn0031195	397.935	0.526352	0.191708	2.7456	0.00604005	0.0380519	X	CG17600
FBgn0029906	281.988	-0.464616	0.169368	-2.74323	0.00608377	0.0383039	X	xit
FBgn0036136	803.297	-0.258247	0.09415	-2.74294	0.00608925	0.0383148	3L	Ufd1-like
FBgn0032139	29.6325	1.92774	0.703066	2.7419	0.00610841	0.0384118	2L	CG13116
FBgn0004394	2.69234	4.60026	1.67902	2.73985	0.00614673	0.0386291	2L	pdm2
FBgn0035016	1189.98	-0.441286	0.161093	-2.73932	0.00615667	0.0386678	2R	CG4612
FBgn0038868	277.216	-0.510065	0.186368	-2.73687	0.00620277	0.0388106	3R	CG5862
FBgn0033661	1723.07	-0.876256	0.320132	-2.73717	0.00619707	0.0388106	2R	CG13185
FBgn0031093	699.721	-0.410329	0.149936	-2.7367	0.00620591	0.0388106	X	CG9581
FBgn0030629	199.666	-0.579266	0.211626	-2.73721	0.00619624	0.0388106	X	CG9123
FBgn0036294	51.7383	0.934254	0.341341	2.73701	0.00619998	0.0388106	3L	CG10654
FBgn0036186	250.832	0.748604	0.273453	2.73759	0.00618907	0.0388106	3L	CG6071
FBgn0015618	107.067	-0.511509	0.186843	-2.73764	0.00618814	0.0388106	3L	Cdk8
FBgn0260858	733.206	-0.277003	0.101261	-2.73552	0.00622814	0.0389259	X	Ykt6
FBgn0033949	31.163	1.43331	0.524006	2.73529	0.00623248	0.0389293	2R	Had2
FBgn0023441	534.747	-1.06033	0.387935	-2.73326	0.00627109	0.0391466	2R	fus
FBgn0037686	16276.4	-0.408197	0.149358	-2.73301	0.00627588	0.0391526	3R	RpL34b
FBgn0031536	437.968	-0.464252	0.170021	-2.73057	0.00632259	0.03942	2L	Cog3
FBgn0283473	282.112	-0.358672	0.131375	-2.73014	0.00633067	0.0394464	X	S6KL
FBgn0262559	1638.57	-0.410884	0.150662	-2.7272	0.0063875	0.0397763	3R	Mdh2
FBgn0037383	176.645	0.425953	0.156307	2.72511	0.006428	0.0400042	3R	CG2023
FBgn0034530	117.092	-0.567649	0.208322	-2.72486	0.00643284	0.0400101	2R	Rcd6
FBgn0027621	864.175	0.300896	0.110484	2.72343	0.00646075	0.0401593	X	Pfrx
FBgn0013733	22922.8	0.426948	0.156782	2.72319	0.00646554	0.0401647	2R	shot
FBgn0266182	12.0237	1.69484	0.622585	2.72227	0.00648358	0.0402524	X	lncRNA:CR44888
FBgn0039137	184.416	-0.393536	0.144584	-2.72184	0.00649187	0.0402794	3R	CG13604
FBgn0038277	95.933	0.925854	0.340233	2.72123	0.00650395	0.0403056	3R	RpS5b
FBgn0035155	337.014	0.352506	0.129536	2.72129	0.00650267	0.0403056	3L	RabX6
FBgn0051614	35.9201	1.12397	0.413386	2.71893	0.00654936	0.0405625	2L	His-Psi:CR31614
FBgn0038446	156.058	0.477912	0.17586	2.71757	0.00657632	0.0407049	3R	CG14903
FBgn0020399	15.144	-1.41695	0.521622	-2.71643	0.00659895	0.0407957	3R	Mst89B
FBgn0026722	409.52	-0.455838	0.167796	-2.71662	0.00659515	0.0407957	2R	drosha
FBgn0029882	1324.04	0.423195	0.155851	2.71538	0.00662005	0.0409014	X	CG3226
FBgn0085337	15.4294	-1.44066	0.530766	-2.7143	0.00664161	0.04101	3R	CG34308
FBgn0004837	256.693	0.32715	0.12061	2.71245	0.0066787	0.0411893	2L	Su(H)
FBgn0266860	5.16452	3.22815	1.1901	2.7125	0.0066777	0.0411893	2R	lncRNA:CR45321
FBgn0263118	139.864	1.33735	0.493145	2.71188	0.00669037	0.0412365	3R	tx
FBgn0083978	13.1393	2.6362	0.972245	2.71146	0.00669885	0.0412459	3L	CG17672
FBgn0035690	396.512	0.360676	0.133022	2.7114	0.00669994	0.0412459	3L	CG10274
FBgn0011227	524.073	-0.55455	0.204641	-2.70986	0.0067311	0.0414128	2R	ox
FBgn0013676	44097.8	0.442112	0.163225	2.70861	0.00675667	0.0415452	mitochondrion_genome	COX3
FBgn0031351	67.2376	-0.619074	0.228622	-2.70785	0.00677215	0.0416154	2L	CG14352
FBgn0034741	101.201	0.694772	0.256633	2.70726	0.00678405	0.0416636	2R	CG4269
FBgn0002638	3360.94	-0.447195	0.165215	-2.70674	0.00679473	0.0417042	3L	Rcc1
FBgn0038834	17896.7	-0.280187	0.103533	-2.70626	0.0068045	0.0417391	3R	RpS30
FBgn0035435	41.8682	-0.860365	0.317971	-2.70579	0.00681415	0.0417733	3L	PIG-C
FBgn0037070	307.794	-0.460259	0.170115	-2.70557	0.00681868	0.0417761	3L	CG11309
FBgn0034529	220.016	-0.453054	0.167469	-2.7053	0.0068243	0.0417856	2R	FAM21
FBgn0026261	315.009	-0.374042	0.138285	-2.70486	0.0068334	0.0418163	2R	bonsai
FBgn0037644	838.467	-0.317451	0.117372	-2.70465	0.00683768	0.0418176	3R	CG11964
FBgn0038916	5.12784	2.50942	0.92873	2.70199	0.00689251	0.0421278	3R	dnd
FBgn0259221	333.227	-0.526895	0.19507	-2.70105	0.00691202	0.0422218	2R	ATP8A
FBgn0033010	993.673	0.4308	0.159539	2.70029	0.00692799	0.0422793	2R	Atf6
FBgn0031491	790.504	-0.319471	0.118314	-2.70021	0.00692968	0.0422793	2L	alpha4GT1
FBgn0038461	323.736	0.387282	0.143438	2.69999	0.00693408	0.042281	3R	CG3678
FBgn0026088	255.714	-0.397964	0.147419	-2.69954	0.00694361	0.0423139	X	CG14818
FBgn0033913	2573.76	0.731312	0.270933	2.69923	0.00694998	0.0423275	2R	CG8468
FBgn0051551	8.45712	2.70428	1.00203	2.69881	0.00695889	0.0423315	3R	CG31551
FBgn0033048	1.82501	4.5832	1.69816	2.69892	0.00695651	0.0423315	2R	CG7881
FBgn0035088	276.963	-0.334461	0.124057	-2.69603	0.00701717	0.0426607	2R	CG3776
FBgn0033763	3.26275	3.09859	1.14945	2.69572	0.00702375	0.0426754	2R	CG8646
FBgn0039712	681.751	-0.303309	0.11255	-2.69488	0.00704133	0.0427569	3R	CG15514
FBgn0266652	2.35208	4.65278	1.72675	2.69454	0.00704866	0.0427761	3L	lncRNA:CR45159
FBgn0028663	1746.46	0.366592	0.136159	2.69238	0.00709437	0.043028	3L	VhaM9.7-b
FBgn0262565	6.35988	3.49708	1.29904	2.69205	0.00710138	0.0430451	2R	CR43105
FBgn0003449	800.449	0.472335	0.17557	2.69029	0.00713892	0.043247	X	snf
FBgn0265365	3.66324	-2.76026	1.02776	-2.6857	0.00723776	0.0438199	2R	lncRNA:CR44306
FBgn0041181	2.24533	4.19627	1.56283	2.68505	0.00725184	0.0438792	2L	Tep3
FBgn0000158	443.743	0.683864	0.254759	2.68435	0.00726703	0.0439257	3R	bam
FBgn0266218	10.3086	-1.84698	0.688066	-2.6843	0.00726809	0.0439257	2L	lncRNA:CR44913
FBgn0264492	3217.28	0.458461	0.170828	2.68376	0.00727996	0.0439715	3L	CkIIalpha
FBgn0283461	191.412	1.67753	0.625327	2.68265	0.00730421	0.044092	3L	Drs
FBgn0031573	85.3533	-0.563808	0.210188	-2.6824	0.00730952	0.044098	2L	CG3407
FBgn0031760	359.728	-0.409451	0.152675	-2.68185	0.00732164	0.0441452	2L	Tsp26A
FBgn0037949	256.423	-0.47058	0.175505	-2.68128	0.00733403	0.0441939	3R	prd1
FBgn0263602	368.1	-0.370257	0.138224	-2.67867	0.00739155	0.0445143	3L	Tasp1
FBgn0085263	18.9564	1.30832	0.488775	2.67673	0.00743447	0.0447465	2R	CG34234
FBgn0031842	940.773	-0.257509	0.0962779	-2.67465	0.00748079	0.0449817	2L	Tango1
FBgn0052483	900.999	0.808147	0.302159	2.67458	0.00748232	0.0449817	3L	CG32483
FBgn0046294	16.9158	2.59712	0.971588	2.67306	0.00751622	0.045159	2R	CG12699
FBgn0030092	108.501	-0.544359	0.203684	-2.67257	0.00752722	0.0451986	X	fh
FBgn0033607	516.003	-0.293598	0.109865	-2.67235	0.00753216	0.0452018	2R	CG9062
FBgn0032374	46.9188	0.81109	0.303655	2.67109	0.0075606	0.0453459	2L	CG14931
FBgn0053971	51.6329	-0.769433	0.288097	-2.67074	0.00756838	0.045366	3L	Ir62a
FBgn0038567	8.43149	2.15637	0.807497	2.67044	0.00757525	0.0453807	3R	CG14316
FBgn0037215	1661.52	-0.441236	0.165265	-2.66987	0.00758809	0.045431	3R	beta-Man
FBgn0036139	7.75801	1.81022	0.678079	2.66963	0.00759341	0.0454364	3L	CG6216
FBgn0030048	1152.37	0.509248	0.190845	2.66838	0.00762169	0.045579	X	CG12112
FBgn0037486	48.5203	2.63065	0.985939	2.66816	0.00762677	0.0455828	3R	CG14605
FBgn0051694	2670.32	0.621768	0.233051	2.66795	0.0076315	0.0455844	2L	CG31694
FBgn0029848	8.56657	1.74905	0.655779	2.66712	0.00765033	0.0456703	X	Btnd
FBgn0051161	33.2167	-0.95723	0.358929	-2.66691	0.00765531	0.0456734	3R	CG31161
FBgn0037134	197.514	-0.399563	0.149884	-2.66582	0.00768014	0.0457949	3L	CG7407
FBgn0264821	162.273	-0.746392	0.280177	-2.664	0.00772171	0.046016	4	asRNA:CR44029
FBgn0016031	1042.96	0.648968	0.243656	2.66346	0.00773406	0.0460628	3L	lama
FBgn0037815	245.082	0.57114	0.214489	2.6628	0.00774938	0.0461273	3R	Rrp46
FBgn0031888	6968.29	0.57905	0.217524	2.662	0.0077678	0.0461768	2L	Pvf2
FBgn0045035	2995.13	-0.280223	0.105304	-2.66109	0.0077889	0.0461768	3R	tefu
FBgn0010389	3.94663	3.34382	1.25628	2.66167	0.0077753	0.0461768	3R	htl
FBgn0050122	3398.37	-0.284422	0.106836	-2.66224	0.00776234	0.0461768	2R	CG30122
FBgn0033524	9.78502	2.13054	0.800612	2.66114	0.0077877	0.0461768	2R	Cyp49a1
FBgn0263598	2565.42	-0.303024	0.113873	-2.66107	0.00778923	0.0461768	2L	Vha68-2
FBgn0027616	1396.4	-0.31084	0.116797	-2.66136	0.00778249	0.0461768	3L	Ythdc1
FBgn0265671	15.9499	1.85095	0.695625	2.66085	0.00779445	0.046181	2L	lncRNA:CR44478
FBgn0031150	1055.51	0.505211	0.189885	2.66061	0.00779988	0.0461864	X	bves
FBgn0030503	151.655	-0.520065	0.195487	-2.66035	0.00780598	0.0461959	X	Tango2
FBgn0039530	9.61778	1.83024	0.68829	2.65912	0.00783457	0.0463383	3R	Tusp
FBgn0259722	185.944	-0.40116	0.150894	-2.65856	0.00784749	0.046388	X	CG42376
FBgn0032477	319.571	-0.413248	0.155534	-2.65696	0.00788497	0.0465827	2L	CG5287
FBgn0039857	26834.6	-0.276495	0.104086	-2.6564	0.00789794	0.0466324	3R	RpL6
FBgn0037107	6.33059	2.08955	0.786898	2.65542	0.00792086	0.046714	3L	CG7166
FBgn0013685	102.903	0.867818	0.326789	2.65559	0.0079169	0.046714	mitochondrion_genome	ND6
FBgn0032609	29.6665	1.26465	0.476466	2.65422	0.00794919	0.0467926	2L	CG13280
FBgn0030073	139.409	-0.682657	0.257205	-2.65414	0.00795107	0.0467926	X	CG10962
FBgn0261532	1161.44	-0.341477	0.128661	-2.65408	0.00795246	0.0467926	3R	cdm
FBgn0030432	34.7546	-0.840566	0.316673	-2.65436	0.00794578	0.0467926	X	CG4404
FBgn0261004	951.4	-0.301046	0.113476	-2.65294	0.00797934	0.0469238	3R	asl
FBgn0033028	1307.69	0.524463	0.197707	2.65274	0.00798422	0.0469256	2R	hrm
FBgn0034921	219.827	0.426067	0.160633	2.65242	0.00799176	0.046943	2R	DCP1
FBgn0034109	195.738	-0.41412	0.156148	-2.6521	0.0079994	0.046961	2R	CG7747
FBgn0039429	7.39845	2.48729	0.938028	2.65162	0.00801069	0.0470003	3R	CG14238
FBgn0260935	330.835	-0.445872	0.168168	-2.65135	0.00801698	0.0470103	3R	Vps15
FBgn0029993	3.71438	3.7977	1.43353	2.6492	0.00806818	0.0472638	X	CG1571
FBgn0261703	1470.76	0.480438	0.181355	2.64915	0.00806943	0.0472638	X	gce
FBgn0037046	170.255	0.898534	0.339354	2.64778	0.00810218	0.0474285	3L	CG10581
FBgn0033543	56.4348	-0.747167	0.282272	-2.64698	0.00812142	0.047514	2R	CG12338
FBgn0283478	3506.37	-0.273713	0.103442	-2.64605	0.00814372	0.0476173	2L	und
FBgn0028740	8.50914	1.56081	0.590035	2.64529	0.00816202	0.0476699	2R	CG6362
FBgn0270926	712.781	-0.424382	0.160427	-2.64533	0.00816107	0.0476699	3L	AsnS
FBgn0261808	691.981	-0.746471	0.282252	-2.6447	0.00817639	0.0477267	3R	cu
FBgn0051601	17.1545	1.80398	0.682171	2.64447	0.008182	0.0477322	2L	CG31601
FBgn0032717	1853.52	-0.364638	0.137904	-2.64414	0.00818976	0.0477503	2L	CG10600
FBgn0028490	6239.38	0.511694	0.193567	2.64349	0.00820554	0.0478151	2L	CG31705
FBgn0039315	2.35528	4.76545	1.80365	2.64212	0.00823898	0.0479827	3R	CG13658
FBgn0053230	1063.38	0.786557	0.297737	2.64179	0.00824699	0.0479912	3L	CG33230
FBgn0036741	256.821	-0.357812	0.135449	-2.64167	0.00824981	0.0479912	3L	anchor
FBgn0011703	6286.32	0.357286	0.135352	2.63969	0.00829828	0.0481911	2L	RnrL
FBgn0005671	2841.81	-0.233801	0.0885597	-2.64003	0.00828975	0.0481911	3R	Vha55
FBgn0020277	13.0559	1.78494	0.676186	2.63972	0.00829745	0.0481911	3L	lush
FBgn0037276	5.80157	2.11692	0.802183	2.63896	0.00831616	0.0482677	3R	CG17387
FBgn0026751	1108.88	0.40996	0.155386	2.63833	0.00833158	0.0483298	X	XRCC1
FBgn0030270	13.754	-1.40908	0.534376	-2.63688	0.0083673	0.0485095	X	CG15199
FBgn0004856	1256.97	-0.292649	0.111055	-2.63516	0.00840964	0.0487274	X	Bx42
FBgn0036240	418.504	0.561065	0.212985	2.63429	0.00843122	0.0488249	3L	CG6928
FBgn0039324	5.5761	2.71804	1.03302	2.63114	0.00850981	0.0491921	3R	CG10553
FBgn0039925	4.25053	2.83258	1.07644	2.63144	0.00850228	0.0491921	4	Kif3C
FBgn0261403	3216.46	0.397107	0.150937	2.63094	0.00851478	0.0491921	2R	sxc
FBgn0027329	5390.73	-0.346415	0.131677	-2.63079	0.00851863	0.0491921	X	CCT6
FBgn0031453	8146.37	-0.327823	0.12461	-2.6308	0.00851852	0.0491921	2L	Bacc
FBgn0259167	2.4033	4.03299	1.53314	2.63054	0.00852482	0.0492001	3L	CG42272
FBgn0033816	631.983	-0.369963	0.140655	-2.63029	0.0085311	0.0492086	2R	CG4679
FBgn0086442	1965.84	0.300066	0.114097	2.62991	0.00854078	0.0492368	2L	mib2
FBgn0030004	79.9029	-0.630612	0.239984	-2.62773	0.00859569	0.0495255	X	CG10958
FBgn0032456	9167.84	0.335689	0.127784	2.627	0.00861402	0.0496032	2L	MRP
FBgn0043900	931.873	-0.271211	0.103274	-2.62614	0.00863605	0.0496742	3R	pygo
FBgn0005564	6.81568	1.69614	0.645855	2.6262	0.00863445	0.0496742	3L	Shal
FBgn0028895	69.1781	-0.677529	0.258075	-2.62532	0.00865681	0.04971	2L	CG17328
FBgn0030769	16.0922	2.04526	0.779026	2.6254	0.00865472	0.04971	X	CG13012
FBgn0003941	14389.8	-0.235786	0.0898122	-2.62532	0.00865665	0.04971	2L	RpL40
FBgn0039593	191.85	1.33898	0.51027	2.62405	0.00868901	0.0498436	3R	Sid
FBgn0034070	8.95956	2.03769	0.776553	2.62402	0.00868981	0.0498436	2R	SP2353
FBgn0037473	212.38	-0.485507	0.185125	-2.62259	0.00872646	0.0498863	3R	CG10068
FBgn0038168	942.522	-0.531583	0.202632	-2.62338	0.00870611	0.0498863	3R	omd
FBgn0038252	4.33263	2.4821	0.946234	2.62313	0.0087126	0.0498863	3R	BigH1
FBgn0004607	513.603	0.439311	0.167488	2.62295	0.00871722	0.0498863	4	zfh2
FBgn0039943	511.141	-0.511563	0.19506	-2.62259	0.00872631	0.0498863	X	CG17168
FBgn0052549	2286.05	0.622596	0.237352	2.62309	0.00871363	0.0498863	X	CG32549
FBgn0085399	14.7359	1.74025	0.663818	2.62157	0.00875256	0.0500077	2R	CG34370
FBgn0267792	1850.95	0.224742	0.085783	2.61989	0.00879585	0.050227	2R	rgr
FBgn0050077	194.84	-0.514054	0.196244	-2.61946	0.00880703	0.0502538	2R	Blos1
FBgn0053926	338.545	0.64073	0.244616	2.61933	0.00881035	0.0502538	3L	CG33926
FBgn0045038	3.13362	3.32573	1.26993	2.61883	0.00882323	0.0502714	2L	Proc
FBgn0030697	57.4937	1.12547	0.429761	2.61883	0.00882324	0.0502714	X	CG8565
FBgn0027580	221.118	-0.634423	0.242428	-2.61696	0.00887175	0.0505029	2R	PCB
FBgn0030581	517.433	-0.274744	0.104989	-2.61688	0.00887373	0.0505029	X	CG14408
FBgn0024989	32.0025	1.03843	0.396938	2.6161	0.00889397	0.050562	X	CG3777
FBgn0034214	232.361	-0.361178	0.138054	-2.61621	0.00889127	0.050562	2R	CG6550
FBgn0029713	515.349	-0.558728	0.213691	-2.61466	0.00893164	0.0507198	X	CG11436
FBgn0031442	4.90775	3.2506	1.24314	2.61484	0.00892698	0.0507198	2L	Prosbeta4R1
FBgn0043458	4111.32	0.470258	0.179889	2.61415	0.00894494	0.0507672	3L	CG12084
FBgn0034071	2559.93	-0.28496	0.109088	-2.61219	0.00899641	0.0510311	2R	CG8405
FBgn0266521	1902.97	0.850209	0.325583	2.61134	0.00901872	0.0511294	2L	stai
FBgn0039664	85.8908	-0.535302	0.205098	-2.60998	0.00905479	0.0513055	3R	CG2006
FBgn0042134	5048.97	-0.273757	0.10493	-2.60895	0.00908202	0.0514313	3L	Capr
FBgn0267348	17904.1	-0.371434	0.142391	-2.60855	0.00909276	0.0514637	3L	LanB2
FBgn0032002	102.839	0.607589	0.233113	2.60641	0.00914956	0.0517566	2L	CG8353
FBgn0034062	93.0624	-0.539234	0.206962	-2.60548	0.00917459	0.0518696	2R	CG8388
FBgn0036483	470.332	0.381484	0.146453	2.60482	0.00919219	0.0519239	3L	CG12316
FBgn0052109	207.502	0.396477	0.152214	2.60474	0.00919434	0.0519239	3L	CG32109
FBgn0022359	16.9099	1.33894	0.514315	2.60334	0.00923196	0.052079	3R	Sodh-2
FBgn0260987	2339.16	0.439506	0.168813	2.60351	0.00922736	0.052079	3L	vtd
FBgn0033699	27002.4	-0.283269	0.108852	-2.60234	0.00925912	0.0522035	2R	RpS11
FBgn0028896	10.0958	1.52685	0.587192	2.60027	0.00931515	0.0524693	2L	CG17329
FBgn0262366	161.319	-0.681468	0.262081	-2.60022	0.00931649	0.0524693	3L	CG43064
FBgn0020660	183.152	0.963747	0.370781	2.59924	0.00934315	0.0525905	3L	eIF4B
FBgn0062442	650.654	-0.369442	0.142148	-2.599	0.00934953	0.0525924	3R	Cisd2
FBgn0035439	182.096	0.596923	0.229688	2.59885	0.00935374	0.0525924	3L	CG14961
FBgn0004509	1239.99	0.85565	0.329481	2.59696	0.00940521	0.0528527	3R	Fur1
FBgn0031189	153.969	-0.513812	0.197876	-2.59663	0.00941426	0.0528746	X	CG14618
FBgn0032730	55.4031	-0.752942	0.290065	-2.59577	0.00943788	0.0529441	2L	CG10431
FBgn0003527	14.5362	1.68761	0.650223	2.59543	0.00944729	0.0529441	2R	stil
FBgn0054034	7.47311	1.77869	0.685299	2.59549	0.00944559	0.0529441	3R	CG34034
FBgn0260243	826.192	0.509317	0.196194	2.59598	0.00943204	0.0529441	3R	E(var)3-9
FBgn0033989	431.518	-0.518474	0.199788	-2.59512	0.00945576	0.0529626	2R	CG7639
FBgn0039510	4.08604	2.33145	0.89877	2.59404	0.00948542	0.0530997	3R	CG3339
FBgn0031399	446.633	-0.515141	0.198646	-2.59326	0.00950698	0.0531913	2L	mio
FBgn0036997	259.204	2.58401	0.996825	2.59224	0.00953544	0.0532635	3L	CG5955
FBgn0033158	12.543	2.40956	0.929488	2.59236	0.0095321	0.0532635	2R	CG12164
FBgn0266421	3155.77	0.452547	0.174578	2.59224	0.00953546	0.0532635	X	RPA3
FBgn0038331	943.095	0.364311	0.14059	2.59129	0.0095617	0.0533519	3R	Ccm3
FBgn0262570	48.8549	1.2719	0.490811	2.59142	0.00955809	0.0533519	2R	CG43110
FBgn0014931	207.257	-0.479731	0.18516	-2.5909	0.00957258	0.0533836	3R	CG2678
FBgn0032818	483.095	-0.29856	0.115266	-2.59018	0.00959244	0.0534492	2L	CG10628
FBgn0259238	389.676	-0.381875	0.147458	-2.58973	0.0096052	0.0534492	2R	CG42336
FBgn0260862	174.63	-0.467208	0.180398	-2.58987	0.00960123	0.0534492	3L	Vti1a
FBgn0266671	613.313	-0.260865	0.100719	-2.59001	0.00959728	0.0534492	2R	Sec6
FBgn0027568	1336.88	0.323507	0.124954	2.58902	0.00962509	0.0535307	2L	Cand1
FBgn0031257	32.5923	-1.22517	0.473285	-2.58866	0.00963495	0.0535565	2L	CG4133
FBgn0004649	9.07126	2.15106	0.831048	2.58837	0.00964304	0.0535725	X	yl
FBgn0032086	31.8594	1.93758	0.748672	2.58802	0.00965291	0.053579	2L	CG17906
FBgn0001977	1457.83	0.407363	0.157417	2.58779	0.00965932	0.053579	2L	CIAPIN1
FBgn0035586	342.694	-0.35675	0.13786	-2.58777	0.0096599	0.053579	3L	Fitm
FBgn0016697	1737.62	0.374856	0.144891	2.58716	0.00967708	0.0536453	2R	Prosalpha5
FBgn0038196	628.101	0.554075	0.214284	2.58571	0.00971801	0.053843	3R	CG9922
FBgn0261545	688.013	0.408351	0.157977	2.58488	0.00974131	0.0539139	2R	CG42663
FBgn0036512	401.786	-0.325163	0.125794	-2.58489	0.00974099	0.0539139	3L	CG16979
FBgn0031500	80.0638	-0.600262	0.232409	-2.58278	0.00980086	0.0542142	2L	CG17221
FBgn0031664	329.434	-0.438672	0.170016	-2.58019	0.00987474	0.05459	2L	CG8892
FBgn0267205	11.9816	1.90813	0.739579	2.58002	0.00987945	0.05459	3R	lncRNA:CR45645
FBgn0030056	1074.38	0.342183	0.13268	2.57902	0.0099081	0.0547188	X	CAH3
FBgn0032433	182.575	0.802282	0.311107	2.5788	0.00991446	0.0547244	2L	Oatp33Ea
FBgn0266918	830.484	0.47581	0.184527	2.57853	0.00992208	0.054737	3L	CG32486
FBgn0035209	913.639	0.589385	0.228618	2.57804	0.00993634	0.0547862	3L	msd1
FBgn0031255	141.449	0.700176	0.271682	2.57719	0.00996074	0.0548053	2L	BBS8
FBgn0032845	122.572	-0.535251	0.207694	-2.57712	0.00996274	0.0548053	2L	CG10747
FBgn0039581	1434.92	-0.323777	0.125622	-2.57739	0.00995504	0.0548053	3R	Moca-cyp
FBgn0036871	26.2846	-1.01773	0.394929	-2.57699	0.00996654	0.0548053	3L	CG14096
FBgn0030478	638.074	-0.434455	0.168589	-2.57701	0.00996601	0.0548053	X	CG1640
FBgn0037301	1006.69	0.395157	0.153354	2.57677	0.00997286	0.0548106	3R	Mms19
FBgn0015776	2863.67	0.42594	0.16534	2.57614	0.00999101	0.0548222	2L	nrv1
FBgn0033408	12.9279	-1.52052	0.590274	-2.57596	0.00999636	0.0548222	2R	CG8800
FBgn0034878	946.061	-0.385603	0.149672	-2.57631	0.00998602	0.0548222	2R	pita
FBgn0030777	193.434	-0.555849	0.215783	-2.57597	0.00999606	0.0548222	X	CG9672
FBgn0033638	1593.97	0.408722	0.158741	2.57477	0.0100307	0.0549812	2R	CG9005
FBgn0033241	1371.74	-0.399383	0.155176	-2.57374	0.0100607	0.0550867	2R	CG2915
FBgn0033566	327.696	0.361557	0.140479	2.57374	0.0100604	0.0550867	2R	CG18004
FBgn0023520	129.399	-0.533024	0.207129	-2.57339	0.0100706	0.0551075	X	CG3857
FBgn0032205	190.543	0.488345	0.189778	2.57324	0.0100753	0.0551075	2L	CG4957
FBgn0034534	261.88	-0.37838	0.147065	-2.57288	0.0100855	0.0551325	2R	maf-S
FBgn0085386	50.38	1.41579	0.550335	2.5726	0.0100939	0.0551325	3R	CG34357
FBgn0267985	157.423	-0.510958	0.198621	-2.57252	0.010096	0.0551325	3L	lncRNA:CR46252
FBgn0032253	21.911	1.64576	0.639879	2.57198	0.0101118	0.0551599	2L	LManI
FBgn0032644	162.14	0.510033	0.198296	2.57208	0.010109	0.0551599	2L	CG5131
FBgn0030717	245.667	-0.36085	0.140353	-2.57101	0.0101402	0.0552856	X	Slc25A46a
FBgn0052732	468.94	-0.382142	0.148668	-2.57043	0.0101572	0.0553489	X	Setd3
FBgn0032897	5.40597	3.54741	1.38039	2.56987	0.0101737	0.0554094	2L	CG9336
FBgn0003480	106.769	-0.531374	0.206825	-2.5692	0.0101934	0.055487	3R	spn-B
FBgn0034172	94.7762	-0.719591	0.280261	-2.56758	0.0102412	0.0557176	2R	CG6665
FBgn0031196	39.6223	1.06868	0.416296	2.56712	0.0102546	0.0557611	X	Cluap1
FBgn0051710	351.439	0.470608	0.183363	2.56653	0.0102721	0.0557675	2L	CG31710
FBgn0033544	1419.07	-0.448584	0.174774	-2.56665	0.0102685	0.0557675	2R	CG7220
FBgn0012034	2130.17	-0.463138	0.180428	-2.56688	0.0102619	0.0557675	3L	AcCoAS
FBgn0260435	3.26042	3.29646	1.2847	2.56593	0.0102901	0.0558357	2L	CR42530
FBgn0036569	206.064	-0.589709	0.229846	-2.56567	0.0102978	0.0558479	3L	IleRS-m
FBgn0085322	37.4496	-0.809199	0.315422	-2.56545	0.0103042	0.0558528	3R	CG34293
FBgn0038363	129.339	-0.532217	0.207556	-2.5642	0.0103413	0.0559792	3R	Acyp2
FBgn0260855	1368.71	0.356	0.138824	2.56439	0.0103357	0.0559792	X	Sec22
FBgn0036934	21.2135	1.07685	0.41997	2.56412	0.0103439	0.0559792	3L	sNPF-R
FBgn0031643	3495.04	0.831178	0.324239	2.56347	0.0103631	0.0560535	2L	CG3008
FBgn0266724	162.434	-0.408808	0.159517	-2.56278	0.0103837	0.0561358	3L	Trs20
FBgn0026749	92.7622	-0.518267	0.202269	-2.56226	0.0103993	0.0561901	X	Yippee
FBgn0036928	2308.23	0.434457	0.169625	2.56128	0.0104288	0.0563199	3L	Tom20
FBgn0038961	295.868	-0.432133	0.168749	-2.5608	0.0104432	0.0563679	3R	CG13850
FBgn0019949	208.004	-0.371885	0.145319	-2.55909	0.0104948	0.056587	2R	Cdk9
FBgn0052582	319.351	0.537326	0.209968	2.55908	0.0104948	0.056587	X	lncRNA:CR32582
FBgn0032358	93.7912	-0.683113	0.266967	-2.55879	0.0105038	0.0566054	2L	Ppt2
FBgn0052230	2143.16	0.404519	0.158154	2.55776	0.010535	0.0567437	3L	ND-MLRQ
FBgn0001341	612.157	0.534701	0.209152	2.55651	0.0105727	0.0568572	X	Mybbp1A
FBgn0038803	57.3016	-1.16637	0.45624	-2.55649	0.0105734	0.0568572	3R	CG5191
FBgn0015037	175.972	1.14674	0.448619	2.55615	0.0105838	0.0568572	2R	Cyp4p1
FBgn0030863	1693.49	-0.314128	0.122875	-2.55649	0.0105733	0.0568572	X	CG8188
FBgn0052137	4.23163	2.41212	0.943638	2.55619	0.0105824	0.0568572	3L	CG32137
FBgn0046225	168.133	-0.530312	0.207498	-2.55575	0.0105961	0.0568934	3R	CG17230
FBgn0052712	8.42922	2.04547	0.800532	2.55514	0.0106146	0.0569082	X	CG32712
FBgn0033453	1803.72	0.633415	0.247901	2.55511	0.0106155	0.0569082	2R	Sting
FBgn0036386	246.563	-0.400907	0.156889	-2.55536	0.0106077	0.0569082	3L	CG8833
FBgn0263042	18.5657	1.58205	0.619764	2.55267	0.0106901	0.0572487	3L	CG43337
FBgn0285963	20.1787	1.4479	0.567197	2.55272	0.0106884	0.0572487	3R	CG46339
FBgn0263342	48.3591	0.780165	0.305674	2.55228	0.0107021	0.0572826	3L	lncRNA:CR43423
FBgn0027655	1317.26	-0.389877	0.1528	-2.55156	0.0107242	0.0573127	3R	htt
FBgn0053635	95.8594	-0.567069	0.222219	-2.55185	0.0107152	0.0573127	2L	CG33635
FBgn0036482	15.4474	1.77032	0.693822	2.55155	0.0107245	0.0573127	3L	CG13457
FBgn0025571	842.098	-0.323113	0.126669	-2.55084	0.0107463	0.0573995	3R	SF1
FBgn0037540	117.827	-0.523009	0.205134	-2.54959	0.010785	0.0575761	3R	Pbp95
FBgn0005771	48.7863	0.727978	0.285727	2.5478	0.0108403	0.0578269	2L	noc
FBgn0015527	1475.3	0.289313	0.113558	2.54771	0.0108432	0.0578269	X	peng
FBgn0036165	612.362	0.639931	0.251223	2.54727	0.0108571	0.0578705	3L	chrb
FBgn0037490	114.999	-0.481824	0.18919	-2.54678	0.0108723	0.0578791	3R	CG10053
FBgn0259683	1613.22	1.51923	0.596525	2.5468	0.0108714	0.0578791	2L	Ir40a
FBgn0260755	553.079	0.552305	0.216873	2.54667	0.0108756	0.0578791	3L	CG42553
FBgn0024983	351.559	-0.470403	0.184788	-2.54563	0.010908	0.0580215	X	CG4293
FBgn0003308	93.9176	-0.819637	0.322103	-2.54464	0.010939	0.058156	3R	ry
FBgn0010194	748.63	-0.437655	0.172017	-2.54426	0.010951	0.0581898	X	Wnt5
FBgn0040907	186.16	-0.591822	0.232641	-2.54393	0.0109613	0.0582142	X	mRpL33
FBgn0052544	11.5231	-1.67064	0.656765	-2.54373	0.0109674	0.0582166	X	CG32544
FBgn0038772	653.295	0.386643	0.152087	2.54225	0.0110141	0.0584338	3R	mdlc
FBgn0033258	51.6418	-0.641956	0.252536	-2.54204	0.0110207	0.058439	2R	CG8712
FBgn0041186	1443.14	0.278953	0.109778	2.54106	0.0110516	0.0585179	3R	Slbp
FBgn0051324	1296.77	0.596825	0.234843	2.54138	0.0110417	0.0585179	3R	CG31324
FBgn0085352	11.4184	1.25816	0.495173	2.54085	0.0110585	0.0585179	X	CG34323
FBgn0041342	4003.29	-0.447653	0.176181	-2.54086	0.0110579	0.0585179	3L	Pcyt1
FBgn0052554	77.5932	0.550914	0.216865	2.54035	0.0110742	0.0585708	X	CG32554
FBgn0000259	3191.54	-0.402463	0.158729	-2.53554	0.0112275	0.0593204	X	CkIIbeta
FBgn0053687	33.0235	0.822918	0.324535	2.53569	0.0112228	0.0593204	3L	CG33687
FBgn0261437	234.616	-0.407591	0.160769	-2.53526	0.0112364	0.0593368	2L	CSN8
FBgn0041588	451.291	-0.499208	0.196978	-2.53433	0.0112662	0.0594333	3R	eIF2D
FBgn0026409	4772.06	-0.345383	0.136278	-2.5344	0.011264	0.0594333	3L	Mpcp2
FBgn0266183	15.253	-1.35841	0.536066	-2.53404	0.0112755	0.0594516	X	lncRNA:CR44889
FBgn0030006	92.4615	-0.565239	0.223096	-2.53361	0.0112894	0.0594945	X	CG17982
FBgn0038118	976.334	-0.404844	0.159813	-2.53324	0.0113013	0.0595263	3R	timeout
FBgn0031782	398.238	-0.348592	0.1377	-2.53153	0.0113565	0.0597865	2L	WDR79
FBgn0028919	188.19	0.716969	0.283275	2.53099	0.011374	0.0598169	2L	CG16865
FBgn0032646	1174.57	0.385383	0.152265	2.53101	0.0113736	0.0598169	2L	mEFTs
FBgn0032242	1673.99	-0.274646	0.108554	-2.53003	0.0114053	0.059951	2L	CG5355
FBgn0034408	271.228	1.67313	0.661623	2.52882	0.0114446	0.0601269	2R	sano
FBgn0035553	11.8141	2.05241	0.811803	2.52821	0.0114645	0.0602005	3L	CG13722
FBgn0040340	778.231	-0.469323	0.185773	-2.52633	0.0115261	0.0604929	X	TRAM
FBgn0011274	588.581	0.676019	0.267646	2.5258	0.0115436	0.0605537	2L	Dif
FBgn0037899	2425.91	-0.346345	0.137139	-2.52549	0.0115536	0.0605593	3R	RpL24-like
FBgn0027587	658.067	-0.267628	0.105974	-2.52541	0.0115565	0.0605593	3L	CG7028
FBgn0033429	75.3872	-0.615519	0.243756	-2.52515	0.011565	0.0605731	2R	CG12929
FBgn0035372	681.289	-0.295365	0.117018	-2.52411	0.0115993	0.0607217	3L	CG12093
FBgn0022981	23.415	0.998521	0.395631	2.52387	0.0116072	0.0607318	3R	rpk
FBgn0032514	2885.34	-0.326218	0.12929	-2.52315	0.011631	0.0608256	2L	CG9302
FBgn0032488	597.358	0.285156	0.113048	2.52244	0.0116544	0.0609165	2L	CG16812
FBgn0033993	63.4718	-0.665709	0.263956	-2.52204	0.0116675	0.0609543	2R	CG8089
FBgn0013576	12251.9	-0.841681	0.333902	-2.52074	0.0117108	0.0611493	3R	mtd
FBgn0025692	124.894	0.818158	0.324614	2.5204	0.0117221	0.0611767	2R	Lfg
FBgn0053689	9.17874	1.70154	0.675436	2.51917	0.0117632	0.06136	3L	CG33689
FBgn0036809	9.04944	2.1742	0.863199	2.51877	0.0117767	0.0613992	3L	CG12477
FBgn0039635	1219.93	-0.310549	0.123343	-2.51778	0.0118098	0.0615406	3R	Pdhb
FBgn0261261	429.209	-0.549855	0.218742	-2.51372	0.0119465	0.0622216	3R	plx
FBgn0031688	19.0269	1.22312	0.486834	2.51241	0.0119911	0.0624217	2L	Cyp28d2
FBgn0003961	9.30061	2.47534	0.985433	2.51193	0.0120072	0.0624423	2L	Uro
FBgn0051807	57.1155	0.968566	0.385582	2.51196	0.0120063	0.0624423	2L	CG31807
FBgn0035677	3.14148	3.89752	1.55185	2.51153	0.0120208	0.0624815	3L	CG13293
FBgn0038490	66.6676	-0.726569	0.289505	-2.5097	0.0120835	0.0627756	3R	CG5285
FBgn0037468	10894.6	0.431413	0.171995	2.50829	0.0121317	0.0629936	3R	CG1943
FBgn0267363	6.71075	3.54548	1.41396	2.50748	0.0121597	0.0631073	4	JYalpha
FBgn0036848	361.029	-0.393038	0.156786	-2.50684	0.0121816	0.0631888	3L	Naxd
FBgn0038462	122.3	0.436338	0.174078	2.50657	0.0121909	0.0632053	3R	CG17556
FBgn0011754	731.278	-0.340745	0.135951	-2.50638	0.0121976	0.063208	X	PhKgamma
FBgn0260758	7.54758	-1.69753	0.677695	-2.50485	0.0122502	0.0634486	2L	CG42556
FBgn0034737	17.8722	1.35202	0.539935	2.50404	0.0122785	0.063563	2R	CG11362
FBgn0029861	632.364	-0.581456	0.23229	-2.50315	0.0123094	0.0636633	X	CG3815
FBgn0052218	119.353	0.699473	0.27944	2.50312	0.0123103	0.0636633	3L	lncRNA:CR32218
FBgn0039044	3635.59	0.912407	0.364564	2.50274	0.0123237	0.0636684	3R	p53
FBgn0250789	15568.3	-0.329578	0.131682	-2.50283	0.0123206	0.0636684	3L	alpha-Spec
FBgn0040929	94.9298	0.526551	0.210471	2.50178	0.0123572	0.0638093	X	CG12659
FBgn0037643	3436.63	0.311522	0.124546	2.50127	0.0123749	0.0638684	3R	ScsbetaA
FBgn0031142	86.5692	0.603985	0.241507	2.5009	0.0123879	0.0639034	X	r-cup
FBgn0026872	17.0334	-1.24624	0.498448	-2.50025	0.0124107	0.0639886	X	CG14777
FBgn0027950	250.069	-0.324743	0.129899	-2.49996	0.0124207	0.0640082	3R	MBD-like
FBgn0030063	301.295	0.446915	0.17884	2.49896	0.0124557	0.0641563	X	CG1789
FBgn0037073	1065.31	0.407057	0.162906	2.49872	0.0124642	0.0641675	3L	Tsr1
FBgn0032247	112.146	-0.459086	0.183786	-2.49793	0.012492	0.0642584	2L	CG5188
FBgn0032364	8.1426	1.93809	0.775899	2.49787	0.0124943	0.0642584	2L	CG4970
FBgn0038865	5.58538	-2.76439	1.10702	-2.49715	0.0125195	0.0643535	3R	cDIP
FBgn0085319	2.02588	4.15321	1.66329	2.49699	0.0125254	0.0643535	3R	CG34290
FBgn0266083	962.926	0.415289	0.166354	2.49643	0.0125452	0.064423	2R	ocm
FBgn0034918	182.682	0.381923	0.153018	2.49594	0.0125625	0.0644793	2R	Pym
FBgn0035995	309.455	-0.377329	0.15121	-2.49539	0.0125819	0.0645467	3L	CG3529
FBgn0037469	452.787	0.477571	0.19143	2.49475	0.0126044	0.0646301	3R	Dpck
[truncated: 8,251 more rows]

## Sheet: res.H2Av-Control
	baseMean	log2FoldChange	lfcSE	stat	pvalue	padj	chr	symbol
FBgn0014092	272.719	-2.10539	0.143732	-14.648	1.38774e-48	1.42243e-44	2L	CG4278
FBgn0052207	372.381	-2.5114	0.176346	-14.2414	5.07324e-46	2.60003e-42	3L	hpRNA:CR32207
FBgn0000146	1675.08	-1.84511	0.131066	-14.0777	5.20759e-45	1.77926e-41	2L	aub
FBgn0037298	712.648	-3.00182	0.226203	-13.2704	3.43521e-40	8.80272e-37	3R	Sccpdh1
FBgn0000826	171.562	-3.16993	0.240691	-13.1701	1.30372e-39	2.67262e-36	X	png
FBgn0002962	163.478	2.35647	0.185528	12.7014	5.80489e-37	9.91669e-34	3R	nos
FBgn0031245	171.43	-3.33588	0.263939	-12.6388	1.28995e-36	1.88886e-33	2L	CG3625
FBgn0038815	311.496	-2.33445	0.187777	-12.432	1.75167e-35	2.24432e-32	3R	CG5466
FBgn0263111	225.368	-2.92997	0.236641	-12.3815	3.29165e-35	3.74883e-32	X	cac
FBgn0031313	824.735	-3.50936	0.287332	-12.2136	2.63048e-34	2.69625e-31	2L	CG5080
FBgn0000108	397.867	-4.51914	0.37733	-11.9766	4.71111e-33	4.3899e-30	X	Appl
FBgn0035151	138.192	-3.1049	0.262786	-11.8153	3.25311e-32	2.77869e-29	3L	CG17129
FBgn0051658	307.551	-1.8482	0.157564	-11.7298	8.96304e-32	6.56223e-29	2L	Nnf1b
FBgn0036191	476.241	-1.69518	0.144459	-11.7347	8.4604e-32	6.56223e-29	3L	Sugb
FBgn0016034	403.448	-1.64365	0.141916	-11.5819	5.09222e-31	3.47969e-28	3L	mael
FBgn0036282	120.019	-3.85894	0.341545	-11.2985	1.33495e-29	8.55202e-27	3L	Smyd4-2
FBgn0030230	369.539	-1.99477	0.180564	-11.0475	2.2549e-28	1.35957e-25	X	Rph
FBgn0040322	162.646	-1.74179	0.158899	-10.9616	5.84588e-28	3.3289e-25	3L	GNBP2
FBgn0027550	474.517	-3.96258	0.361748	-10.954	6.3601e-28	3.43111e-25	2L	CG6495
FBgn0062928	541.517	-2.18258	0.200496	-10.8859	1.34586e-27	6.89752e-25	3L	hpRNA:CR33940
FBgn0003227	140.342	-2.19725	0.206947	-10.6174	2.47304e-26	1.20708e-23	3R	rec
FBgn0023000	228.695	-2.41971	0.229617	-10.538	5.77065e-26	2.6886e-23	3L	mth
FBgn0024196	998.41	-1.37664	0.131108	-10.5	8.63565e-26	3.84849e-23	2R	robl
FBgn0038330	225.509	-2.16039	0.206465	-10.4637	1.26778e-25	5.41447e-23	3R	CG14868
FBgn0035227	2229.71	-0.887526	0.0851285	-10.4257	1.89215e-25	7.75783e-23	3L	Iml1
FBgn0034248	227.187	-1.92632	0.185634	-10.377	3.15529e-25	1.24391e-22	2R	CG14483
FBgn0030057	541.707	-1.67715	0.161789	-10.3663	3.52966e-25	1.33996e-22	X	Ppt1
FBgn0032715	116.597	-2.35685	0.23319	-10.107	5.14363e-24	1.88294e-21	2L	CG17597
FBgn0010549	328.994	-2.98999	0.296804	-10.074	7.20152e-24	2.54536e-21	2R	l(2)03659
FBgn0033469	304.874	4.17427	0.41716	10.0064	1.42847e-23	4.88062e-21	2R	CG12133
FBgn0002021	680.309	-1.52291	0.154614	-9.84977	6.87025e-23	2.27162e-20	2L	l(2)37Bb
FBgn0029588	115.945	-2.30711	0.234538	-9.83681	7.81466e-23	2.50313e-20	X	CG14798
FBgn0037332	645.233	-1.04903	0.106858	-9.81706	9.50763e-23	2.95313e-20	3R	Hcs
FBgn0086446	353.357	-1.63084	0.167589	-9.73114	2.22083e-22	6.69514e-20	2L	DCTN6-p27
FBgn0027791	425.705	-1.75511	0.180705	-9.71254	2.66609e-22	7.80784e-20	X	O-fut2
FBgn0260932	114.763	-2.22397	0.229129	-9.7062	2.83727e-22	8.07835e-20	2R	cuff
FBgn0030669	360.68	-1.2285	0.127572	-9.62981	5.98396e-22	1.65772e-19	X	CG9240
FBgn0030717	245.667	-1.41751	0.147438	-9.61433	6.95575e-22	1.87622e-19	X	Slc25A46a
FBgn0045980	424.706	-2.13667	0.222456	-9.60487	7.62523e-22	2.00407e-19	3R	niki
FBgn0259722	185.944	-1.49996	0.158022	-9.49207	2.26483e-21	5.80362e-19	X	CG42376
FBgn0039690	108.549	-1.9535	0.207767	-9.40239	5.33368e-21	1.33342e-18	3R	Gnpnat
FBgn0035608	3282.08	-2.29926	0.246112	-9.34236	9.4214e-21	2.29927e-18	3L	blanks
FBgn0085484	198.929	-1.80905	0.194824	-9.28559	1.60813e-20	3.83332e-18	3L	Pdxk
FBgn0013323	143.797	-2.82437	0.309727	-9.11889	7.58951e-20	1.76801e-17	2L	Ptth
FBgn0031247	223.878	-1.46792	0.161942	-9.06447	1.25212e-19	2.85205e-17	2L	CG11562
FBgn0035955	77.0084	-2.70434	0.299189	-9.0389	1.58252e-19	3.52627e-17	3L	CG5194
FBgn0004507	1832.1	-1.11474	0.125297	-8.89673	5.75173e-19	1.25144e-16	2L	GlyP
FBgn0017482	140.377	-2.06544	0.232246	-8.89333	5.93042e-19	1.25144e-16	2R	T3dh
FBgn0035132	134.855	-2.27929	0.25632	-8.89236	5.98249e-19	1.25144e-16	3L	mthl10
FBgn0000808	53.6206	-2.8554	0.322301	-8.85941	8.04358e-19	1.64893e-16	X	gd
FBgn0040466	259.49	-1.38611	0.156859	-8.83667	9.86118e-19	1.94379e-16	3R	Dlip2
FBgn0030968	70.8323	-2.68435	0.303715	-8.83838	9.71176e-19	1.94379e-16	X	CG7322
FBgn0026176	272.761	2.03907	0.230938	8.8295	1.05143e-18	2.03343e-16	2R	SkpB
FBgn0021856	550.106	-1.01819	0.115395	-8.82355	1.10887e-18	2.1048e-16	2L	l(2)k14505
FBgn0025582	5414.46	-0.986541	0.111963	-8.81132	1.23677e-18	2.30488e-16	3L	eIF3e
FBgn0266211	59.7805	-3.04788	0.349055	-8.73181	2.50632e-18	4.58747e-16	2L	CR44906
FBgn0035523	49.4725	-3.11538	0.357363	-8.71769	2.83929e-18	5.10574e-16	3L	Ctl1
FBgn0033244	976.853	-0.926561	0.106905	-8.66717	4.4299e-18	7.8287e-16	2R	CG8726
FBgn0033225	619.739	-0.85201	0.0990433	-8.6024	7.80674e-18	1.35626e-15	2R	TTLL12
FBgn0033451	431.891	-1.27029	0.147718	-8.59944	8.01084e-18	1.36852e-15	2R	Marc
FBgn0036826	236.297	-1.39587	0.164497	-8.48566	2.1449e-17	3.60414e-15	3L	arx
FBgn0034035	349.035	-1.13235	0.133704	-8.46907	2.47351e-17	4.08927e-15	2R	CG8207
FBgn0025640	704.597	-1.04381	0.123394	-8.45912	2.69412e-17	4.38329e-15	X	CG13369
FBgn0038735	317.946	-1.50349	0.177898	-8.45138	2.87882e-17	4.55767e-15	3R	CG4662
FBgn0038972	424.722	-1.51478	0.179245	-8.45092	2.89023e-17	4.55767e-15	3R	CG7054
FBgn0014032	42.0229	-3.9866	0.472916	-8.42983	3.46156e-17	5.37591e-15	X	Sptr
FBgn0037358	746.682	-1.09235	0.12993	-8.40719	4.19946e-17	6.42454e-15	3R	elm
FBgn0032449	72.8235	-2.23004	0.26546	-8.40068	4.4391e-17	6.6913e-15	2L	CG17036
FBgn0031360	406.661	-1.19682	0.144381	-8.28931	1.13905e-16	1.69207e-14	2L	CG31937
FBgn0013531	141.422	-1.61398	0.195944	-8.23696	1.7664e-16	2.55008e-14	2L	MED20
FBgn0039270	134.186	-1.50569	0.182794	-8.23706	1.76491e-16	2.55008e-14	3R	PQBP1
FBgn0038327	234.735	-1.63478	0.199954	-8.17578	2.93954e-16	4.18477e-14	3R	Trax
FBgn0031059	290.314	-1.6034	0.197999	-8.09803	5.58549e-16	7.84264e-14	X	CG14229
FBgn0038490	66.6676	-2.67594	0.330866	-8.08767	6.08147e-16	8.42365e-14	3R	CG5285
FBgn0265177	175.844	-1.57367	0.195391	-8.05397	8.01481e-16	1.09536e-13	2R	CG44242
FBgn0034221	177.976	2.66925	0.332989	8.01602	1.09226e-15	1.47082e-13	2R	CG10764
FBgn0033905	178	-1.87976	0.234542	-8.01461	1.10491e-15	1.47082e-13	2R	CG18324
FBgn0032873	639.639	-0.893867	0.111854	-7.99138	1.33435e-15	1.73168e-13	2L	CG2614
FBgn0038053	393.559	-1.43684	0.1798	-7.99135	1.33466e-15	1.73168e-13	3R	CG18549
FBgn0050499	640.569	-1.0807	0.135264	-7.98951	1.35475e-15	1.73577e-13	2R	Rpe
FBgn0032923	1578.97	-1.20651	0.151095	-7.98513	1.40378e-15	1.77639e-13	2L	CG9248
FBgn0034951	170.206	-1.24734	0.157039	-7.94289	1.97528e-15	2.43935e-13	2R	CG3860
FBgn0030678	267.445	-1.43138	0.180181	-7.94413	1.95558e-15	2.43935e-13	X	CG11679
FBgn0023528	487.852	-0.996464	0.125776	-7.92255	2.32681e-15	2.83926e-13	X	CG2924
FBgn0032787	344.27	-1.11243	0.140862	-7.89736	2.84879e-15	3.43531e-13	2L	CG10195
FBgn0030799	113.736	-2.56654	0.327034	-7.84794	4.22939e-15	5.04085e-13	X	CG4872
FBgn0086856	242.233	-1.67592	0.214639	-7.80809	5.80633e-15	6.84079e-13	2L	CG11555
FBgn0038828	50.3236	5.50619	0.705653	7.80297	6.04668e-15	7.04301e-13	3R	CG17270
FBgn0004087	238.099	-1.44254	0.185294	-7.78516	6.96245e-15	8.01856e-13	3R	Dhfr
FBgn0031483	663.938	-0.881929	0.11367	-7.75868	8.58154e-15	9.77342e-13	2L	CG9641
FBgn0261041	2626.85	-1.05682	0.136592	-7.73702	1.01773e-14	1.14635e-12	2R	stj
FBgn0027521	66.8175	-2.23929	0.291135	-7.69158	1.45327e-14	1.61913e-12	X	CG3679
FBgn0023521	90.5899	-1.75093	0.227738	-7.68833	1.49072e-14	1.643e-12	X	CG3587
FBgn0023531	734.148	-0.849309	0.110567	-7.68142	1.57335e-14	1.71562e-12	X	CG32809
FBgn0041588	451.291	-1.53157	0.199435	-7.67956	1.59634e-14	1.72236e-12	3R	eIF2D
FBgn0030938	30.4541	-2.90169	0.378244	-7.67147	1.70037e-14	1.8155e-12	X	CG15047
FBgn0039525	70.0259	-2.35234	0.306853	-7.66602	1.77413e-14	1.8582e-12	3R	CG5646
FBgn0034046	314.567	-1.36219	0.177697	-7.66584	1.77662e-14	1.8582e-12	2R	tun
FBgn0033883	486.201	-0.860513	0.112443	-7.65287	1.96542e-14	2.03491e-12	2R	CG16935
FBgn0263029	60.2834	-2.29157	0.299499	-7.65134	1.98896e-14	2.03868e-12	2R	CG43324
FBgn0010772	843.759	-0.802459	0.104907	-7.64926	2.02132e-14	2.05134e-12	3R	Xe7
FBgn0037897	791.293	-1.61578	0.212116	-7.61742	2.58796e-14	2.60064e-12	3R	CG5270
FBgn0037270	4586.22	-0.819369	0.108122	-7.57821	3.50353e-14	3.48653e-12	3R	eIF3f1
FBgn0041630	235.321	-1.88257	0.2491	-7.5575	4.10885e-14	4.04959e-12	3L	Hexo1
FBgn0051855	446.51	-0.879476	0.116622	-7.54125	4.65487e-14	4.54404e-12	2L	CG31855
FBgn0030511	149.855	-1.45415	0.193136	-7.52913	5.10806e-14	4.93939e-12	X	CG11158
FBgn0036916	324.716	-1.02513	0.136222	-7.52543	5.25458e-14	5.03359e-12	3L	Mtr3
FBgn0038042	76.7363	-2.0824	0.277823	-7.4954	6.60946e-14	6.27287e-12	3R	Scgbeta
FBgn0062442	650.654	-1.07346	0.143384	-7.48657	7.06944e-14	6.64787e-12	3R	Cisd2
FBgn0037535	263.342	-0.998112	0.133425	-7.4807	7.39286e-14	6.8888e-12	3R	PIG-H
FBgn0035335	336.242	-1.2822	0.171827	-7.46218	8.50994e-14	7.85828e-12	3L	mRpL23
FBgn0037550	187.114	-1.46269	0.196093	-7.45919	8.70592e-14	7.96747e-12	3R	CG9667
FBgn0019830	362.734	-1.06749	0.144052	-7.41041	1.25907e-13	1.14208e-11	2L	colt
FBgn0035727	153.38	-1.6639	0.225058	-7.39321	1.4333e-13	1.28871e-11	3L	CG10063
FBgn0037898	75.5482	-2.08337	0.282428	-7.37664	1.62337e-13	1.44692e-11	3R	Dtd
FBgn0011770	207.541	-1.50598	0.204339	-7.37004	1.70583e-13	1.50731e-11	X	Gip
FBgn0037537	1057.76	-0.682307	0.092633	-7.3657	1.76222e-13	1.54383e-11	3R	CG2767
FBgn0037581	151.142	-1.57951	0.214608	-7.35997	1.83948e-13	1.59236e-11	3R	CG7352
FBgn0016701	725.087	-0.69632	0.0946177	-7.35931	1.8487e-13	1.59236e-11	2R	Rab4
FBgn0027525	3250.37	-0.799236	0.108889	-7.33993	2.13713e-13	1.82547e-11	2R	LTV1
FBgn0033372	230.819	-1.20822	0.164819	-7.3306	2.2913e-13	1.94098e-11	2R	CG13742
FBgn0035082	375.624	-0.935103	0.12765	-7.32551	2.37989e-13	1.9995e-11	2R	CG2811
FBgn0024236	4423.52	0.975593	0.133312	7.3181	2.51504e-13	2.09587e-11	3L	foi
FBgn0038038	158.606	-1.58948	0.217233	-7.31691	2.53741e-13	2.09746e-11	3R	Sccpdh2
FBgn0262820	130.749	1.94886	0.266715	7.30691	2.73358e-13	2.24154e-11	2R	CG43191
FBgn0035496	78.6297	3.41803	0.469727	7.27664	3.42227e-13	2.78399e-11	3L	CG14990
FBgn0011207	1364.14	-0.681221	0.0940236	-7.24521	4.31766e-13	3.48473e-11	2L	pelo
FBgn0025336	400.329	-0.973248	0.134719	-7.22426	5.03826e-13	4.03454e-11	2R	CG4882
FBgn0022023	4192.08	-0.825731	0.114547	-7.20869	5.64935e-13	4.48882e-11	2L	eIF3h
FBgn0050372	1011.15	-0.588488	0.0816676	-7.20589	5.76656e-13	4.54671e-11	2R	Asap
FBgn0032943	271.762	-1.37203	0.190942	-7.18559	6.69178e-13	5.23594e-11	2L	Tsp39D
FBgn0034816	92.0791	-2.06844	0.288594	-7.16732	7.64828e-13	5.93901e-11	2R	CG3085
FBgn0032233	215.217	-1.27971	0.178834	-7.15583	8.31654e-13	6.40937e-11	2L	dpr19
FBgn0259982	200.388	-1.44269	0.202034	-7.14082	9.27762e-13	7.09668e-11	2L	Uxt
FBgn0037440	208.464	-1.26496	0.178141	-7.10092	1.23928e-12	9.40936e-11	3R	CRAT
FBgn0037019	384.312	-0.81436	0.115385	-7.05774	1.69237e-12	1.27461e-10	3L	Pex16
FBgn0036942	24.4468	-4.5943	0.651044	-7.05681	1.70363e-12	1.27461e-10	3L	CG7328
FBgn0031639	269.162	-1.06835	0.151484	-7.05256	1.75657e-12	1.3047e-10	2L	mRpS2
FBgn0052448	190.692	-1.24125	0.176055	-7.05034	1.78476e-12	1.3161e-10	3L	CG32448
FBgn0028408	55.1201	2.33385	0.332232	7.02477	2.14426e-12	1.5699e-10	2R	Drep2
FBgn0010808	828.262	-0.650432	0.0927113	-7.01567	2.28844e-12	1.65187e-10	3R	Chchd3
FBgn0030151	1800.3	-0.732318	0.104371	-7.01647	2.27544e-12	1.65187e-10	X	CG1354
FBgn0031011	175.432	-2.03861	0.29099	-7.00577	2.45639e-12	1.7607e-10	X	CG8034
FBgn0026741	287.625	-1.18959	0.169909	-7.00131	2.53572e-12	1.80494e-10	2R	mRpL18
FBgn0036254	422.882	-1.02451	0.146526	-6.99202	2.70949e-12	1.91533e-10	3L	CG5645
FBgn0053138	1040.42	-0.937728	0.134213	-6.98685	2.81129e-12	1.97368e-10	2R	AGBE
FBgn0259823	122.891	1.82895	0.262033	6.97983	2.95536e-12	2.06071e-10	3R	CG42404
FBgn0031461	382.862	-1.71944	0.246443	-6.97701	3.0152e-12	2.08823e-10	2L	daw
FBgn0039674	370.082	-0.914695	0.131201	-6.97171	3.13114e-12	2.15397e-10	3R	CG1907
FBgn0035372	681.289	-0.820067	0.11791	-6.955	3.52553e-12	2.40911e-10	3L	CG12093
FBgn0051800	377.298	-1.21525	0.17476	-6.95384	3.55475e-12	2.41299e-10	2L	CG31800
FBgn0036909	298.879	-1.05835	0.152594	-6.93575	4.04066e-12	2.72479e-10	3L	Ccdc58
FBgn0034928	57.3686	-2.76263	0.398874	-6.92607	4.32685e-12	2.89871e-10	2R	CG13562
FBgn0264478	32.7281	3.77647	0.545654	6.921	4.48468e-12	2.98493e-10	3L	CG43886
FBgn0032849	259.503	-1.16868	0.169009	-6.91491	4.68146e-12	3.09581e-10	2L	mRpS18B
FBgn0262467	401.144	-0.821868	0.1193	-6.88908	5.61532e-12	3.68955e-10	2L	Scox
FBgn0039112	761.935	-0.874142	0.127074	-6.879	6.02762e-12	3.93523e-10	3R	SdhD
FBgn0024846	678.4	-0.672824	0.0978773	-6.87416	6.23545e-12	4.03003e-10	2L	p38b
FBgn0033381	519.373	-1.09365	0.159105	-6.8738	6.25147e-12	4.03003e-10	2R	GstE13
FBgn0028970	239.838	-1.06226	0.15456	-6.8728	6.29519e-12	4.03286e-10	2L	betaggt-II
FBgn0039846	403.171	-0.848462	0.123531	-6.86842	6.49156e-12	4.13283e-10	3R	PNPase
FBgn0052679	62.7617	2.50732	0.365395	6.86196	6.79209e-12	4.29746e-10	X	CG32679
FBgn0050342	387.548	-0.840121	0.122529	-6.8565	7.05697e-12	4.43767e-10	2R	Prp38
FBgn0033814	453.493	-1.67692	0.244705	-6.8528	7.24195e-12	4.52622e-10	2R	Qsox1
FBgn0032162	90.4186	-1.71672	0.251329	-6.83054	8.4595e-12	5.25515e-10	2L	CG4592
FBgn0014023	396.342	-0.969825	0.142328	-6.81403	9.49021e-12	5.85992e-10	3R	mRpL47
FBgn0010417	815.874	-0.686851	0.100827	-6.81216	9.61452e-12	5.90113e-10	3L	Taf6
FBgn0037778	112.361	-1.25918	0.185016	-6.8058	1.0049e-11	6.12133e-10	3R	mtTFB2
FBgn0034058	213.804	-1.0971	0.161236	-6.80432	1.01525e-11	6.12133e-10	2R	Pex11
FBgn0031651	264.511	-0.973182	0.143023	-6.80438	1.01487e-11	6.12133e-10	2L	mRpL24
FBgn0030605	568.929	-0.862734	0.127044	-6.79082	1.11497e-11	6.6833e-10	X	ND-B18
FBgn0035099	991.385	-0.756512	0.111432	-6.78898	1.12932e-11	6.72994e-10	3L	CG6845
FBgn0010407	131.458	-1.4561	0.214831	-6.77791	1.21925e-11	7.22389e-10	2L	Ror
FBgn0010520	122.633	-1.21428	0.17952	-6.764	1.34235e-11	7.90755e-10	2L	Bka
FBgn0032000	207.41	-1.0048	0.148643	-6.75984	1.38144e-11	8.09126e-10	2L	CG8372
FBgn0001197	7260.02	-4.12396	0.610356	-6.75664	1.41225e-11	8.22474e-10	3R	His2Av
FBgn0250868	214.42	-1.45258	0.215049	-6.75462	1.4321e-11	8.29323e-10	2R	CG42239
FBgn0032763	121.083	-1.5419	0.228633	-6.74401	1.54071e-11	8.87207e-10	2L	CG17568
FBgn0014931	207.257	-1.2749	0.189201	-6.73831	1.60241e-11	9.17583e-10	3R	CG2678
FBgn0030853	726.307	-0.61373	0.0915202	-6.70596	2.00089e-11	1.13939e-09	X	ND-24
FBgn0267985	157.423	-1.36533	0.203723	-6.70187	2.05763e-11	1.15883e-09	3L	lncRNA:CR46252
FBgn0284435	1618.41	-1.22987	0.183505	-6.70209	2.05456e-11	1.15883e-09	X	tyn
FBgn0039269	588.393	-0.925911	0.138188	-6.70037	2.0789e-11	1.16441e-09	3R	veli
FBgn0035888	69.4848	-2.72405	0.406643	-6.69887	2.10035e-11	1.17003e-09	3L	CG7120
FBgn0010340	162.856	-1.15844	0.173032	-6.69494	2.15765e-11	1.19546e-09	3R	140up
FBgn0030629	199.666	-1.44785	0.216437	-6.68948	2.23971e-11	1.23425e-09	X	CG9123
FBgn0004118	631.102	-0.949412	0.14195	-6.68835	2.25693e-11	1.23709e-09	3R	nAChRbeta2
FBgn0038183	252.339	-1.03394	0.154636	-6.68631	2.28873e-11	1.24785e-09	3R	CG9286
FBgn0004872	306.645	2.97363	0.445136	6.68026	2.38515e-11	1.29353e-09	2L	piwi
FBgn0038268	175.695	-1.18898	0.178063	-6.67729	2.43395e-11	1.30618e-09	3R	CG3631
FBgn0027601	579.513	-0.948901	0.142102	-6.67763	2.42838e-11	1.30618e-09	X	pdgy
FBgn0270927	582.743	-1.30846	0.196062	-6.67371	2.4941e-11	1.33148e-09	3R	betaGlu
FBgn0032703	256.584	-1.00762	0.151009	-6.67259	2.51323e-11	1.33475e-09	2L	CG10343
FBgn0030647	142.499	1.81079	0.27225	6.6512	2.90705e-11	1.52862e-09	X	CG6324
FBgn0020389	184.55	-1.19931	0.180317	-6.65115	2.9081e-11	1.52862e-09	3L	Papss
FBgn0030716	128.361	-1.91325	0.287909	-6.64533	3.02541e-11	1.58217e-09	X	CG9170
FBgn0039868	366.366	-0.983459	0.148048	-6.64286	3.07658e-11	1.60076e-09	3R	CG11563
FBgn0261373	68.6164	-1.67051	0.252051	-6.62765	3.41068e-11	1.76563e-09	2R	CG33228
FBgn0034243	1788.31	-0.725858	0.109572	-6.62451	3.48412e-11	1.79459e-09	2R	Ns2
FBgn0043012	653.362	-1.19995	0.181299	-6.61859	3.62637e-11	1.85851e-09	3R	AP-2sigma
FBgn0032262	33.2591	-2.49966	0.377995	-6.61293	3.76775e-11	1.91185e-09	2L	CG7384
FBgn0031048	1225.3	-0.640033	0.096778	-6.61342	3.7554e-11	1.91185e-09	X	CG12237
FBgn0032321	530.066	-0.740217	0.112674	-6.56953	5.04733e-11	2.50291e-09	2L	YL-1
FBgn0032487	131.156	-1.44644	0.220137	-6.57065	5.00945e-11	2.50291e-09	2L	Ski6
FBgn0024841	272.156	-1.52918	0.232753	-6.56994	5.03342e-11	2.50291e-09	3R	Pcd
FBgn0085384	1228.79	1.97771	0.30096	6.57136	4.98573e-11	2.50291e-09	3R	CG34355
FBgn0030742	49.7181	-2.25283	0.342932	-6.56932	5.05466e-11	2.50291e-09	X	CG9919
FBgn0265191	740.274	-1.37889	0.20994	-6.56799	5.09988e-11	2.51316e-09	2R	Gyg
FBgn0032595	170.054	-1.10932	0.168971	-6.56518	5.19706e-11	2.5488e-09	2L	CG17996
FBgn0032221	192.877	1.19497	0.182187	6.55903	5.41579e-11	2.64342e-09	2L	Schip1
FBgn0036629	71.0725	-1.81984	0.277706	-6.55312	5.63456e-11	2.73717e-09	3L	GluRS-m
FBgn0027378	429.377	-0.861378	0.131516	-6.5496	5.76932e-11	2.78941e-09	3R	MRG15
FBgn0039993	1969.47	-0.758069	0.115928	-6.53916	6.18671e-11	2.97717e-09	2R	CG17691
FBgn0266042	225.511	-1.75381	0.268747	-6.52587	6.76079e-11	3.23823e-09	2R	asRNA:CR44807
FBgn0036691	416.378	-0.838765	0.128566	-6.52401	6.8452e-11	3.26341e-09	3L	beg
FBgn0037671	3449.34	-0.792964	0.121647	-6.51854	7.09932e-11	3.36889e-09	3R	ATP6AP2
FBgn0038575	55.6028	1.71662	0.263591	6.51244	7.3941e-11	3.4926e-09	3R	CG7208
FBgn0030311	312.772	-0.905495	0.139258	-6.5023	7.91001e-11	3.71916e-09	X	CG11699
FBgn0033900	264.015	-0.947958	0.146186	-6.48461	8.89635e-11	4.16382e-09	2R	CysRS-m
FBgn0035149	383.321	-0.85552	0.132139	-6.47442	9.51795e-11	4.4345e-09	3L	MED30
FBgn0034067	265.6	-2.42657	0.374988	-6.47104	9.73286e-11	4.51411e-09	2R	CG8399
FBgn0039358	1517.4	-1.01769	0.157291	-6.47008	9.79509e-11	4.52251e-09	3R	CG5028
FBgn0038471	271.279	-0.892547	0.138126	-6.46185	1.03433e-10	4.73297e-09	3R	CG5220
FBgn0263025	74.8647	-1.71589	0.265532	-6.4621	1.03262e-10	4.73297e-09	3R	HSPBAP1
FBgn0026261	315.009	-0.902017	0.139656	-6.45886	1.05498e-10	4.80603e-09	2R	bonsai
FBgn0037561	239.448	-0.99191	0.153626	-6.45667	1.07029e-10	4.83282e-09	3R	CG9630
FBgn0040323	292.322	-1.07705	0.166795	-6.45733	1.06563e-10	4.83282e-09	3L	GNBP1
FBgn0038742	1197.04	-0.63759	0.098896	-6.44708	1.14027e-10	5.12621e-09	3R	Arc42
FBgn0083961	144.1	-1.54117	0.239293	-6.4405	1.19082e-10	5.33008e-09	2L	CG34125
FBgn0267084	19.4841	-2.63029	0.409262	-6.4269	1.30233e-10	5.80384e-09	X	asRNA:CR45528
FBgn0038243	69.5302	2.80271	0.436177	6.42563	1.31325e-10	5.82721e-09	3R	CG8066
FBgn0038917	75.3049	-1.51007	0.235188	-6.42069	1.35655e-10	5.99337e-09	3R	CG6678
FBgn0037369	406.516	-0.877292	0.136772	-6.41427	1.41497e-10	6.22464e-09	3R	CG2100
FBgn0020305	723.023	-0.796914	0.124515	-6.40016	1.55211e-10	6.79877e-09	2L	dbe
FBgn0261437	234.616	-1.04531	0.163443	-6.39556	1.59959e-10	6.97694e-09	2L	CSN8
FBgn0036551	83.5391	2.20152	0.344914	6.3828	1.73878e-10	7.5519e-09	3L	CG17029
FBgn0031601	53.6401	-2.26424	0.355637	-6.36672	1.9311e-10	8.3518e-09	2L	Dim1
FBgn0032922	142.284	-1.1113	0.174575	-6.36573	1.94363e-10	8.37066e-09	2L	Coq3
FBgn0010265	16673.1	-0.660623	0.103865	-6.36041	2.01215e-10	8.62952e-09	2L	RpS13
FBgn0052205	38.2329	-2.02032	0.317996	-6.35328	2.10766e-10	9.00146e-09	3L	hpRNA:CR32205
FBgn0039859	63.4245	-1.64563	0.25905	-6.35255	2.11775e-10	9.00705e-09	3R	CG11539
FBgn0033901	1673.44	-0.837653	0.131976	-6.34701	2.19537e-10	9.29857e-09	2R	O-fut1
FBgn0032509	964.719	-0.825337	0.130143	-6.34177	2.27147e-10	9.58129e-09	2L	CG6523
FBgn0031286	591.895	-0.74982	0.118438	-6.33092	2.43707e-10	1.02377e-08	2L	CG3862
FBgn0038803	57.3016	-3.13533	0.495868	-6.32291	2.56678e-10	1.06949e-08	3R	CG5191
FBgn0033755	1563.47	-0.902494	0.142731	-6.32304	2.56465e-10	1.06949e-08	2R	ClC-b
FBgn0039136	821.614	-0.767045	0.121432	-6.31666	2.67281e-10	1.10734e-08	3R	CG5902
FBgn0034027	139.313	-1.09159	0.172822	-6.31629	2.67923e-10	1.10734e-08	2R	CG8187
FBgn0285962	192.844	-0.963239	0.152551	-6.31421	2.71546e-10	1.11781e-08	2R	CG46338
FBgn0037108	794.374	-0.730205	0.115686	-6.31195	2.75536e-10	1.1297e-08	3L	Alg11
FBgn0032138	6615.11	-0.774412	0.122723	-6.31025	2.78587e-10	1.13766e-08	2L	CG4364
FBgn0029175	147.534	-1.13738	0.180275	-6.30912	2.80624e-10	1.14143e-08	2R	sotv
FBgn0033987	176.033	1.96882	0.312149	6.30729	2.83956e-10	1.15041e-08	2R	ckn
FBgn0036811	208.767	-1.14347	0.181541	-6.29871	3.00132e-10	1.21116e-08	3L	MED11
FBgn0267027	76.4	-1.34445	0.213575	-6.29499	3.07411e-10	1.23567e-08	2R	lncRNA:CR45471
FBgn0038811	288.82	-0.984345	0.156488	-6.29022	3.17013e-10	1.26929e-08	3R	Pus1
FBgn0036512	401.786	-0.797767	0.126855	-6.28879	3.19955e-10	1.27609e-08	3L	CG16979
FBgn0035590	151.229	-1.19108	0.189461	-6.2867	3.24289e-10	1.28836e-08	3L	Prpk
FBgn0052707	325.237	-0.908243	0.144606	-6.28082	3.36802e-10	1.3329e-08	X	APC4
FBgn0036369	22.475	-5.29183	0.842988	-6.27747	3.44134e-10	1.35668e-08	3L	CG10089
FBgn0033088	401.845	-0.891329	0.14263	-6.24922	4.12507e-10	1.62e-08	2R	PGAP3
FBgn0001189	656.901	-0.675209	0.108215	-6.23949	4.39e-10	1.71746e-08	X	hfw
FBgn0039114	245.51	-0.825377	0.132467	-6.2308	4.64045e-10	1.80854e-08	3R	Lsd-1
FBgn0260450	713.185	-0.946853	0.152103	-6.22509	4.81291e-10	1.86865e-08	X	CalpC
FBgn0275436	420.251	-1.11804	0.179975	-6.21219	5.22509e-10	2.02102e-08	2R	PheRS-m
FBgn0040334	288.053	-1.11176	0.179054	-6.20907	5.32978e-10	2.05377e-08	X	Tsp3A
FBgn0039004	916.562	-0.743412	0.119742	-6.20847	5.35042e-10	2.054e-08	3R	Nup133
FBgn0037102	283.41	-1.19684	0.193212	-6.19442	5.85017e-10	2.23747e-08	3L	CRIF
FBgn0031435	42.1375	-2.76826	0.447355	-6.18805	6.09114e-10	2.32097e-08	2L	Elba2
FBgn0010213	1023.47	-0.658153	0.107068	-6.14703	7.89453e-10	2.99216e-08	2R	Sod2
FBgn0283442	44.7672	3.25427	0.529434	6.1467	7.91099e-10	2.99216e-08	2L	vas
FBgn0000447	1302.79	-0.73218	0.119298	-6.13739	8.38873e-10	3.16119e-08	3R	Dhod
FBgn0037338	664.499	-0.790245	0.128848	-6.13314	8.616e-10	3.23495e-08	3R	Snm1
FBgn0026375	1266.53	-0.557953	0.0910373	-6.12884	8.85217e-10	3.31149e-08	X	RhoGAPp190
FBgn0038299	18.8043	4.05087	0.66244	6.11507	9.65126e-10	3.59729e-08	3R	Spn88Eb
FBgn0032790	187.737	-0.994722	0.162865	-6.10763	1.01121e-09	3.75541e-08	2L	CG10194
FBgn0034965	252.586	-1.10147	0.180591	-6.09926	1.06562e-09	3.94318e-08	2R	ppk29
FBgn0062440	279.543	-1.20193	0.197147	-6.0966	1.08345e-09	3.99473e-08	2R	EMRE
FBgn0052268	24.9796	4.61762	0.757626	6.09485	1.09539e-09	4.02429e-08	3L	Drsl6
FBgn0032430	521.666	-0.726099	0.119185	-6.09222	1.11356e-09	4.07643e-08	2L	CG6388
FBgn0025777	581.189	-0.69253	0.113736	-6.08894	1.13664e-09	4.14609e-08	2L	homer
FBgn0052163	173.598	-1.37761	0.22653	-6.08135	1.19172e-09	4.33161e-08	3L	CG32163
FBgn0037749	374.141	-1.26439	0.20819	-6.07324	1.25353e-09	4.54017e-08	3R	CG9471
FBgn0035101	598.529	-0.96316	0.158737	-6.06764	1.29806e-09	4.68489e-08	3L	p130CAS
FBgn0023520	129.399	-1.29175	0.212973	-6.06532	1.31691e-09	4.73624e-08	X	CG3857
FBgn0265351	111.532	-1.14114	0.188207	-6.0632	1.33436e-09	4.78222e-08	3R	nac
FBgn0038609	411.571	-0.772406	0.127428	-6.06149	1.34867e-09	4.8167e-08	3R	Nup43
FBgn0029754	33.8095	2.6405	0.435842	6.05837	1.37505e-09	4.89383e-08	X	CG15930
FBgn0051522	531.974	-0.831397	0.137311	-6.05485	1.40548e-09	4.98484e-08	3R	CG31522
FBgn0034535	83.9065	-1.21883	0.201477	-6.04948	1.45311e-09	5.13599e-08	2R	CG11110
FBgn0264384	33.12	-2.26076	0.374028	-6.04435	1.50009e-09	5.28383e-08	X	lncRNA:CR43836
FBgn0031816	188.419	1.27007	0.210242	6.041	1.53166e-09	5.37654e-08	2L	Rchy1
FBgn0037529	946.06	-0.712204	0.118163	-6.0273	1.66724e-09	5.83249e-08	3R	mRpS9
FBgn0260720	44.148	-1.97647	0.328267	-6.02093	1.73418e-09	6.04605e-08	2R	asRNA:CR42547
FBgn0036956	51.9933	-2.4608	0.409433	-6.01026	1.85227e-09	6.43584e-08	3L	CG13813
FBgn0038363	129.339	-1.27109	0.211772	-6.00217	1.94693e-09	6.74189e-08	3R	Acyp2
FBgn0028664	210.389	-0.869128	0.145165	-5.98716	2.13538e-09	7.36959e-08	3L	VhaM9.7-c
FBgn0033233	186.887	-1.03271	0.172515	-5.9862	2.148e-09	7.38824e-08	2R	Kdm4A
FBgn0260862	174.63	-1.0994	0.183752	-5.98309	2.18944e-09	7.50561e-08	3L	Vti1a
FBgn0261671	1306.73	-0.703715	0.117789	-5.97436	2.3099e-09	7.89217e-08	2L	tweek
FBgn0037282	1723.48	-0.657945	0.110219	-5.96945	2.38055e-09	8.10652e-08	3R	CG14657
FBgn0051713	44.7094	-1.73752	0.291159	-5.96758	2.40792e-09	8.17258e-08	2L	Apf
FBgn0036063	61.7097	-1.52856	0.256339	-5.96303	2.47604e-09	8.37604e-08	3L	CG6674
FBgn0021967	452.9	-0.758259	0.127201	-5.96113	2.50493e-09	8.44589e-08	2L	ND-PDSW
FBgn0022153	308.155	-0.807066	0.135848	-5.94093	2.83409e-09	9.52439e-08	2L	l(2)k05819
FBgn0034231	100.063	-1.13733	0.191506	-5.93888	2.8698e-09	9.6129e-08	2R	APC10
FBgn0039183	1483.47	-0.793248	0.133584	-5.9382	2.88173e-09	9.62141e-08	3R	Dis3
FBgn0031428	48.2958	-1.81904	0.306494	-5.935	2.93848e-09	9.77904e-08	2L	CG9886
FBgn0034654	1849.52	-0.886466	0.149378	-5.93439	2.94937e-09	9.78351e-08	2R	eIF3k
FBgn0045761	1558.97	0.752915	0.127129	5.92246	3.17162e-09	1.04531e-07	3R	CHKov1
FBgn0026086	438.905	-0.8555	0.144445	-5.92266	3.16778e-09	1.04531e-07	X	Adar
FBgn0001491	555.737	-0.779863	0.13172	-5.92059	3.2079e-09	1.05347e-07	X	l(1)10Bb
FBgn0030655	649.195	0.650408	0.109864	5.92013	3.21695e-09	1.05347e-07	X	CG9213
FBgn0003317	475.338	-0.717593	0.121382	-5.91188	3.3823e-09	1.10409e-07	2R	sax
FBgn0034177	119.351	-1.2142	0.205527	-5.90776	3.46793e-09	1.12845e-07	2R	AsnRS-m
FBgn0039129	955.575	1.07047	0.181429	5.90022	3.6301e-09	1.17748e-07	3R	RpS19b
FBgn0028382	219.288	-1.06417	0.180397	-5.89903	3.65648e-09	1.1823e-07	2R	cyp33
FBgn0031813	185.292	-1.0515	0.178277	-5.89816	3.67583e-09	1.18482e-07	2L	CG9527
FBgn0037802	59.168	-1.54907	0.263066	-5.88853	3.89645e-09	1.25199e-07	3R	Sirt6
FBgn0261266	217.57	-0.921044	0.156471	-5.88635	3.9481e-09	1.26463e-07	2L	zuc
FBgn0283503	498.382	-0.86854	0.147671	-5.88159	4.06349e-09	1.29753e-07	3L	Neurl4
FBgn0003638	1663.98	-0.822134	0.139901	-5.87653	4.18946e-09	1.3336e-07	X	su(w[a])
FBgn0083984	107.952	-1.1707	0.199254	-5.87542	4.21783e-09	1.33847e-07	3R	CG34148
FBgn0032029	146.286	-1.12102	0.190822	-5.87466	4.23713e-09	1.34045e-07	2L	CG17292
FBgn0032634	503.556	-0.781717	0.133166	-5.87022	4.35209e-09	1.36988e-07	2L	Rpb11
FBgn0026372	35011.4	-0.493945	0.0841468	-5.87004	4.3569e-09	1.36988e-07	3L	RpL23A
FBgn0025109	502.357	-0.704597	0.12025	-5.85945	4.64415e-09	1.45573e-07	2L	Bem46
FBgn0003941	14389.8	-0.525817	0.0898155	-5.85442	4.78683e-09	1.49589e-07	2L	RpL40
FBgn0031717	142.267	-1.23617	0.211396	-5.84764	4.98601e-09	1.54401e-07	2L	Oscillin
FBgn0053977	189.355	-1.1796	0.201705	-5.84814	4.97105e-09	1.54401e-07	3R	CG33977
FBgn0031149	3851.21	-0.812631	0.138962	-5.84785	4.97967e-09	1.54401e-07	X	Stt3A
FBgn0037661	190.209	-1.02043	0.17477	-5.8387	5.26082e-09	1.61932e-07	3R	Ada
FBgn0039697	667.525	-0.856908	0.14676	-5.83884	5.25662e-09	1.61932e-07	3R	CG7834
FBgn0040534	163.669	-1.23603	0.211947	-5.83178	5.48381e-09	1.68291e-07	3R	Sf3b5
FBgn0266685	17.1299	-2.76974	0.476185	-5.81652	6.00837e-09	1.83838e-07	3L	asRNA:CR45175
FBgn0036741	256.821	-0.795521	0.136785	-5.81585	6.03278e-09	1.84036e-07	3L	anchor
FBgn0000339	854.411	-0.611718	0.105229	-5.81319	6.12918e-09	1.86422e-07	2L	cni
FBgn0035169	282.336	-1.04457	0.179714	-5.81242	6.15761e-09	1.86732e-07	3L	Dci
FBgn0038601	435.717	-1.16379	0.200269	-5.81111	6.20615e-09	1.87649e-07	3R	CG18600
FBgn0036687	21.1448	-3.14398	0.54128	-5.8084	6.30709e-09	1.9014e-07	3L	CG6652
FBgn0027093	820	-0.6858	0.118104	-5.80674	6.3701e-09	1.91477e-07	X	ArgRS
FBgn0260858	733.206	-0.588453	0.101358	-5.80566	6.41131e-09	1.91786e-07	X	Ykt6
FBgn0031062	481.67	-0.652122	0.112329	-5.80549	6.41783e-09	1.91786e-07	X	CG14230
FBgn0034365	103.93	-1.48905	0.256568	-5.80372	6.48595e-09	1.93259e-07	2R	CG5335
FBgn0038723	415.921	-0.795442	0.137147	-5.79994	6.63397e-09	1.97096e-07	3R	CG6195
FBgn0039829	129.652	-1.32108	0.227819	-5.79881	6.67853e-09	1.97847e-07	3R	CG15561
FBgn0027583	153.942	-1.19123	0.205536	-5.79574	6.80221e-09	2.0093e-07	3R	CG7601
FBgn0266711	533.638	-0.743762	0.128466	-5.78956	7.05711e-09	2.0786e-07	2R	EloC
FBgn0035253	3914.92	-0.499615	0.0863122	-5.78846	7.10346e-09	2.0803e-07	3L	CG7971
FBgn0261985	733.189	-0.691237	0.119416	-5.78847	7.10321e-09	2.0803e-07	3L	Ptpmeg
FBgn0033089	181.309	-1.1707	0.202433	-5.78314	7.33196e-09	2.1411e-07	2R	CG17266
FBgn0029929	415.525	-0.760004	0.131438	-5.7822	7.37283e-09	2.14692e-07	X	CG4593
FBgn0030481	179.432	-0.907789	0.157087	-5.77888	7.52012e-09	2.1836e-07	X	CG1662
FBgn0033266	274.594	-0.830637	0.143761	-5.7779	7.56375e-09	2.19007e-07	2R	Socs44A
FBgn0031043	733.251	-0.635072	0.109966	-5.77519	7.68654e-09	2.21935e-07	X	Naa20A
FBgn0031379	767.926	-0.699995	0.121224	-5.7744	7.72262e-09	2.22351e-07	2L	CG7289
FBgn0030092	108.501	-1.20326	0.208446	-5.77253	7.80889e-09	2.24205e-07	X	fh
FBgn0037071	579.201	1.01118	0.175492	5.76199	8.31298e-09	2.38011e-07	3L	CG7632
FBgn0025352	814.441	-0.734454	0.127736	-5.74978	8.93615e-09	2.55141e-07	2R	Thiolase
FBgn0025630	400.448	-1.137	0.197888	-5.74564	9.15721e-09	2.59286e-07	X	Rtca
FBgn0028468	925.182	-0.804503	0.140016	-5.74579	9.14922e-09	2.59286e-07	3R	rtet
FBgn0035164	283.845	-1.13649	0.197778	-5.74628	9.12301e-09	2.59286e-07	3L	CG13901
FBgn0031910	145.39	4.63664	0.807154	5.74444	9.22281e-09	2.60424e-07	2L	CG15818
FBgn0037759	622.327	0.834875	0.145406	5.7417	9.3731e-09	2.6394e-07	3R	CG8526
FBgn0066114	345.613	-1.11913	0.194932	-5.74115	9.4035e-09	2.64071e-07	X	GlcAT-I
FBgn0034000	155.497	-1.11288	0.193874	-5.74022	9.45518e-09	2.64797e-07	2R	CG11808
FBgn0026089	195.115	-1.06688	0.185908	-5.73877	9.53657e-09	2.6601e-07	X	CG14817
FBgn0033457	285.709	-0.797402	0.138956	-5.73853	9.55042e-09	2.6601e-07	2R	Ntmt
FBgn0032511	719.11	-0.866176	0.150969	-5.73743	9.61223e-09	2.67006e-07	2L	ND-B22
FBgn0034432	1084.76	-0.765308	0.133724	-5.72306	1.04624e-08	2.89836e-07	2R	CG7461
FBgn0035111	1069.37	-0.480042	0.0839289	-5.71963	1.06755e-08	2.94692e-07	3L	Dis3l2
FBgn0267693	149.303	-1.45746	0.254832	-5.71932	1.06952e-08	2.94692e-07	3R	asRNA:CR46029
FBgn0262511	1987.73	-0.497492	0.0869957	-5.71858	1.0742e-08	2.95067e-07	2R	Vha44
FBgn0035588	166.812	-1.5924	0.27848	-5.71819	1.07663e-08	2.95067e-07	3L	CG10672
FBgn0015818	610.217	-0.54096	0.0946138	-5.71756	1.08065e-08	2.95377e-07	X	Spx
FBgn0035999	194.413	-1.07982	0.189238	-5.70613	1.15571e-08	3.15055e-07	3L	CG3552
FBgn0054008	66.5969	-1.76341	0.309218	-5.70279	1.17865e-08	3.20457e-07	3R	CG34008
FBgn0267585	318.877	-1.14563	0.200927	-5.70171	1.18609e-08	3.21625e-07	2R	lncRNA:CR45923
FBgn0036918	645.064	-0.996833	0.174926	-5.69859	1.208e-08	3.26703e-07	3L	Pfdn6
FBgn0038596	28.1575	3.55236	0.624026	5.69266	1.25077e-08	3.3738e-07	3R	CG14312
FBgn0039946	65.9542	-1.89165	0.332641	-5.68676	1.29475e-08	3.48325e-07	X	ATbp
FBgn0033375	169.807	-0.912484	0.160492	-5.68553	1.30406e-08	3.49912e-07	2R	CG8078
FBgn0084049	107.697	-1.00359	0.176562	-5.68409	1.31512e-08	3.51958e-07	2R	CR41440
FBgn0034109	195.738	-0.897683	0.158031	-5.68042	1.34366e-08	3.58658e-07	2R	CG7747
FBgn0032053	120.98	-1.24127	0.21875	-5.67436	1.39205e-08	3.70611e-07	2L	mRpL51
FBgn0039882	174.916	-1.14938	0.202663	-5.6714	1.41639e-08	3.76115e-07	3R	Rift
FBgn0033605	85.9747	-1.16426	0.205343	-5.66983	1.42937e-08	3.78579e-07	2R	CG9067
FBgn0031321	1332.32	-0.469545	0.0828581	-5.66685	1.45446e-08	3.84232e-07	2L	Tgt
FBgn0052476	272.414	0.914023	0.161372	5.66407	1.47824e-08	3.89512e-07	3L	mthl14
FBgn0031676	223.112	-1.24998	0.220791	-5.66137	1.50168e-08	3.94672e-07	2L	senju
FBgn0034214	232.361	-0.788193	0.139281	-5.659	1.52256e-08	3.99136e-07	2R	CG6550
FBgn0034217	135.403	-1.04733	0.185117	-5.65767	1.53438e-08	4.00972e-07	2R	Lhr
FBgn0025519	538.216	-0.868297	0.153482	-5.65734	1.53739e-08	4.00972e-07	2R	fidipidine
FBgn0030292	272.843	-1.34816	0.23855	-5.65147	1.59081e-08	4.13853e-07	X	CG11752
FBgn0034628	264.679	-0.772327	0.136707	-5.64951	1.60904e-08	4.17536e-07	2R	Acox57D-p
FBgn0028707	69.1232	-1.41143	0.249955	-5.64675	1.63506e-08	4.23215e-07	2L	Mt2
FBgn0038965	466.395	-0.671953	0.11905	-5.64429	1.65863e-08	4.28235e-07	3R	mats
FBgn0034001	152.631	-1.00501	0.178097	-5.64307	1.67048e-08	4.30213e-07	2R	mRpL41
FBgn0030789	469.529	-0.732876	0.129918	-5.64107	1.68993e-08	4.3413e-07	X	Rrp45
FBgn0038389	231.132	-0.911482	0.161674	-5.63779	1.72243e-08	4.41371e-07	3R	CG5516
FBgn0029970	93.6362	-1.54334	0.274025	-5.6321	1.78033e-08	4.55072e-07	X	Nek2
FBgn0016797	178.245	-1.95892	0.347907	-5.6306	1.79586e-08	4.579e-07	3L	fz2
FBgn0033475	437.046	-0.66324	0.117827	-5.62894	1.81322e-08	4.61179e-07	2R	CG12129
FBgn0065035	207.695	-1.24477	0.221446	-5.62109	1.8976e-08	4.81445e-07	X	AlkB
FBgn0037578	538.73	-0.60956	0.108483	-5.61893	1.92149e-08	4.86302e-07	3R	CG9601
FBgn0032701	282.698	-1.1826	0.210672	-5.61347	1.98303e-08	5.00643e-07	2L	CG10341
FBgn0086605	759.875	-0.805201	0.143537	-5.60971	2.02668e-08	5.10405e-07	3R	CG9853
FBgn0003116	204.671	-0.925698	0.165058	-5.60832	2.04297e-08	5.13247e-07	X	pn
FBgn0038550	151.007	-1.58966	0.284421	-5.58912	2.28223e-08	5.71951e-07	3R	CG17801
FBgn0010747	1404.97	-0.414733	0.0742236	-5.58761	2.30219e-08	5.75549e-07	3L	Srp54k
FBgn0033539	630.631	-0.663669	0.118927	-5.58048	2.39861e-08	5.98193e-07	2R	Git
FBgn0037070	307.794	-0.953441	0.171402	-5.56262	2.6576e-08	6.61174e-07	3L	CG11309
FBgn0032249	416.755	-0.994656	0.178954	-5.55818	2.72606e-08	6.76564e-07	2L	TBC1D16
FBgn0033570	519.091	-0.860122	0.154808	-5.55605	2.75947e-08	6.83201e-07	2R	ND-B14
FBgn0035141	228.13	-0.913176	0.16457	-5.54886	2.87535e-08	7.10178e-07	3L	Cypl
FBgn0039849	644.435	-0.523474	0.0943775	-5.5466	2.91286e-08	7.17711e-07	3R	CG11334
FBgn0015777	608.54	-1.10717	0.199644	-5.5457	2.92777e-08	7.19655e-07	2L	nrv2
FBgn0000183	547.454	-0.785812	0.141793	-5.54197	2.99085e-08	7.33401e-07	2L	BicD
FBgn0042213	159.68	-0.962258	0.174226	-5.52305	3.33158e-08	8.15005e-07	3R	CG18731
FBgn0033528	453.196	-0.717317	0.129938	-5.52047	3.38094e-08	8.25109e-07	2R	trsn
FBgn0040907	186.16	-1.29956	0.235577	-5.51651	3.4579e-08	8.41887e-07	X	mRpL33
FBgn0029778	911.398	-0.602618	0.109337	-5.51155	3.55693e-08	8.63946e-07	X	RhoGAP5A
FBgn0030099	400.768	-1.31499	0.23869	-5.50921	3.60444e-08	8.71356e-07	X	CG12056
FBgn0031657	248.125	-0.958504	0.173969	-5.50962	3.59611e-08	8.71356e-07	2L	CG3756
FBgn0030573	44.186	-1.64817	0.299225	-5.50811	3.62698e-08	8.74742e-07	X	nmdyn-D6
FBgn0051360	331.461	-0.764943	0.13906	-5.50083	3.78014e-08	9.09542e-07	3R	CG31360
FBgn0038745	852.681	-0.603585	0.109849	-5.4947	3.91384e-08	9.39504e-07	3R	CG4538
FBgn0013759	1068.19	-0.661341	0.120388	-5.4934	3.94266e-08	9.44212e-07	3R	CASK
FBgn0033527	122.845	-1.1021	0.200877	-5.48644	4.10108e-08	9.79863e-07	2R	CG11777
FBgn0032408	386.146	-1.22741	0.22392	-5.48146	4.21838e-08	1.00554e-06	2L	CG6712
FBgn0014395	37.3294	-1.84042	0.336375	-5.47133	4.46658e-08	1.06224e-06	X	tilB
FBgn0032907	258.614	-1.22652	0.224296	-5.46831	4.54343e-08	1.07801e-06	2L	CG9272
FBgn0033272	571.079	-0.720664	0.131844	-5.46604	4.60188e-08	1.08936e-06	2R	RagC-D
FBgn0034986	239.543	-0.935161	0.171107	-5.46535	4.62007e-08	1.09114e-06	2R	mRpS17
FBgn0029986	49.0217	-2.0252	0.370683	-5.46344	4.67004e-08	1.10041e-06	X	CG15332
FBgn0037817	574.663	-1.05231	0.192633	-5.46278	4.68726e-08	1.10194e-06	3R	Cyp12e1
FBgn0010339	785.151	-0.633235	0.11613	-5.45282	4.95763e-08	1.16283e-06	2R	128up
FBgn0051648	144.985	-0.994101	0.182338	-5.45196	4.98188e-08	1.16584e-06	2L	CG31648
FBgn0038369	578.364	-0.69077	0.126711	-5.45155	4.9932e-08	1.16584e-06	3R	Arpc3A
FBgn0051875	169.595	-1.10428	0.202716	-5.44742	5.11058e-08	1.19053e-06	2L	CG31875
FBgn0003744	920.649	-0.563425	0.103469	-5.44535	5.1705e-08	1.20176e-06	3L	trc
FBgn0038652	1045.18	-1.90665	0.350778	-5.43548	5.46495e-08	1.26732e-06	3R	CG7720
FBgn0031253	130.4	-1.26069	0.232017	-5.43361	5.5226e-08	1.2778e-06	2L	CG11885
FBgn0034403	56.8044	-2.26902	0.417729	-5.43178	5.57934e-08	1.28802e-06	2R	CG18190
FBgn0032480	1133.52	-0.653376	0.120322	-5.43021	5.62865e-08	1.29358e-06	2L	Edem2
FBgn0034528	470.563	-0.998584	0.183892	-5.43027	5.6268e-08	1.29358e-06	2R	CG11180
FBgn0036124	610.802	-0.900962	0.16598	-5.42815	5.69422e-08	1.30572e-06	3L	CG7839
FBgn0266668	763.477	-0.820216	0.151232	-5.42356	5.84236e-08	1.3367e-06	3R	Exo84
FBgn0033191	505.134	-0.820573	0.151592	-5.41303	6.1966e-08	1.41459e-06	2R	CG1598
FBgn0031458	291.814	-0.932691	0.172344	-5.41181	6.23925e-08	1.42116e-06	2L	aph-1
FBgn0026088	255.714	-0.802497	0.148319	-5.41062	6.28071e-08	1.42743e-06	X	CG14818
FBgn0033810	323.363	-0.803004	0.148681	-5.40085	6.63273e-08	1.5041e-06	2R	CG4646
FBgn0260866	138.352	-1.34519	0.249109	-5.39999	6.6644e-08	1.50795e-06	2R	dnr1
FBgn0027080	1201.33	-0.560676	0.103861	-5.39832	6.7266e-08	1.51867e-06	3L	TyrRS
FBgn0027528	164.054	2.01586	0.373648	5.39507	6.8496e-08	1.54304e-06	X	goe
FBgn0266582	1204.36	-0.575595	0.106715	-5.39374	6.9006e-08	1.55112e-06	3L	ND-30
FBgn0032204	145.698	-0.988554	0.183443	-5.3889	7.08899e-08	1.58305e-06	2L	CG4953
FBgn0033317	1282.22	-0.43517	0.0807507	-5.38906	7.08289e-08	1.58305e-06	2R	CG8635
FBgn0034742	914.163	-0.688499	0.127753	-5.38929	7.07365e-08	1.58305e-06	2R	CG4294
FBgn0029857	556.411	-0.797841	0.148369	-5.37743	7.55572e-08	1.68182e-06	X	wuho
FBgn0036099	512.261	-0.618003	0.11493	-5.37723	7.5641e-08	1.68182e-06	3L	CG11811
FBgn0037200	285.496	-0.887953	0.16536	-5.36981	7.88177e-08	1.74866e-06	3L	CG11109
FBgn0035167	116.444	-1.44188	0.268763	-5.36488	8.10014e-08	1.79323e-06	3L	Gr61a
FBgn0030061	957.019	-0.835858	0.155838	-5.36364	8.15614e-08	1.80173e-06	X	CG1785
FBgn0039504	29.7646	-1.66413	0.310333	-5.36239	8.21265e-08	1.81032e-06	3R	CG14260
FBgn0250755	33.8153	-2.0534	0.38302	-5.36108	8.27264e-08	1.81963e-06	3R	CG42233
FBgn0010269	294.03	-0.636802	0.11886	-5.35759	8.43391e-08	1.85113e-06	X	Dsor1
FBgn0033547	88.8757	-1.20296	0.224771	-5.35192	8.70236e-08	1.9019e-06	2R	CG12935
FBgn0261068	938.934	-0.804805	0.150368	-5.35224	8.687e-08	1.9019e-06	2L	LSm7
FBgn0037634	208.414	-0.844769	0.157898	-5.3501	8.7905e-08	1.91301e-06	3R	hng2
FBgn0039751	229.723	-0.795166	0.148617	-5.35045	8.77376e-08	1.91301e-06	3R	CG1983
FBgn0033816	631.983	-0.753143	0.140928	-5.34416	9.08367e-08	1.97262e-06	2R	CG4679
FBgn0032670	35.9515	-2.35181	0.44083	-5.33496	9.55633e-08	2.07088e-06	2L	CG5783
FBgn0039229	1176.41	-0.670061	0.125688	-5.33113	9.7601e-08	2.11057e-06	3R	Saf-B
FBgn0033891	179.896	-0.794903	0.149144	-5.32975	9.83466e-08	2.12222e-06	2R	CG8067
FBgn0032031	196.802	-0.984019	0.184673	-5.32844	9.9062e-08	2.13316e-06	2L	CG13390
FBgn0053523	809.097	-0.61193	0.114928	-5.32444	1.01262e-07	2.17597e-06	3L	CG33523
FBgn0052528	1510.93	-0.726586	0.136618	-5.31836	1.04705e-07	2.24523e-06	X	parvin
FBgn0035422	22855.8	-0.548723	0.103219	-5.31612	1.06006e-07	2.26839e-06	3L	RpL28
FBgn0040754	283.448	-1.00179	0.18858	-5.31229	1.08253e-07	2.31166e-06	2R	CG17059
FBgn0032033	78.5147	-1.11984	0.21139	-5.29751	1.1739e-07	2.50155e-06	2L	CG13392
FBgn0031227	108.303	-1.31198	0.247945	-5.29141	1.21378e-07	2.56521e-06	2L	CG3709
FBgn0011584	1412.72	-0.617182	0.116634	-5.29161	1.21246e-07	2.56521e-06	2L	Trp1
FBgn0037700	753.412	-0.714023	0.134912	-5.2925	1.20655e-07	2.56521e-06	3R	CG8149
FBgn0261535	331.832	-0.994807	0.187995	-5.29167	1.21205e-07	2.56521e-06	2L	l(2)34Fd
FBgn0037359	156.328	-0.949816	0.179534	-5.29046	1.2201e-07	2.57326e-06	3R	MED27
FBgn0050077	194.84	-1.0493	0.198482	-5.28661	1.24604e-07	2.62258e-06	2R	Blos1
FBgn0030662	211.608	-1.21	0.228963	-5.28471	1.25904e-07	2.6445e-06	X	CG9220
FBgn0038431	62.3161	-1.43957	0.27244	-5.284	1.26395e-07	2.64938e-06	3R	CG10405
FBgn0031494	141.208	-0.979559	0.18544	-5.28235	1.27537e-07	2.66786e-06	2L	CG17219
FBgn0035691	28.0063	-2.18636	0.414007	-5.28098	1.28492e-07	2.68237e-06	3L	CG7386
FBgn0034232	282.196	-1.1007	0.208442	-5.2806	1.28759e-07	2.68248e-06	2R	CG4866
FBgn0053145	871.566	-0.723208	0.136981	-5.27961	1.29457e-07	2.69156e-06	2R	GalT1
FBgn0032720	166.138	-0.907346	0.171882	-5.27888	1.29977e-07	2.69672e-06	2L	mRpL13
FBgn0019644	1257.85	-0.586204	0.111055	-5.27852	1.30232e-07	2.69672e-06	3L	ATPsynB
FBgn0028916	180.995	-1.11299	0.210881	-5.27781	1.30735e-07	2.70167e-06	2L	CG33090
FBgn0010247	2609.17	-1.92264	0.364576	-5.27362	1.33756e-07	2.75855e-06	3R	Parp
FBgn0029941	2077.03	-0.516213	0.0979146	-5.27207	1.34895e-07	2.77522e-06	X	CG1677
FBgn0030611	103.028	-1.49063	0.282756	-5.27178	1.35106e-07	2.77522e-06	X	CG15027
FBgn0039630	20.4657	-3.73086	0.707765	-5.27132	1.35445e-07	2.77663e-06	3R	CG11843
FBgn0035122	246.662	-0.771393	0.146364	-5.27038	1.36143e-07	2.78536e-06	3L	mRpL17
FBgn0051950	38.8041	-1.69554	0.321762	-5.26956	1.36749e-07	2.79218e-06	2L	Sbat
FBgn0031036	210.283	-0.832803	0.158088	-5.26797	1.37944e-07	2.81099e-06	X	CG14220
FBgn0013697	31.6027	1.96249	0.372577	5.26735	1.38407e-07	2.81482e-06	mitochondrion_genome	trnK
FBgn0032054	240.654	-0.804122	0.152747	-5.2644	1.4065e-07	2.85479e-06	2L	Uba4
FBgn0039970	1462.77	-0.644305	0.12245	-5.26178	1.42671e-07	2.89007e-06	2R	CG17508
FBgn0032642	263.293	-1.13613	0.215966	-5.26069	1.43514e-07	2.90141e-06	2L	CG5110
FBgn0263197	2368.14	-0.760364	0.144772	-5.25213	1.50352e-07	3.03367e-06	2R	Patronin
FBgn0036984	1062.92	-0.984607	0.187734	-5.24468	1.56551e-07	3.15254e-06	3L	CG13248
FBgn0027579	1009.44	-0.47592	0.090959	-5.23225	1.67459e-07	3.36559e-06	3R	mino
FBgn0050345	72.822	-1.22637	0.234444	-5.23098	1.68612e-07	3.38213e-06	2R	CG30345
FBgn0029706	880.957	-0.639074	0.122265	-5.22697	1.72313e-07	3.44591e-06	X	CG3626
FBgn0014417	387.681	-1.04736	0.200386	-5.22671	1.72554e-07	3.44591e-06	2L	CG13397
FBgn0038467	433.065	-0.741443	0.141864	-5.22645	1.728e-07	3.44591e-06	3R	AdSL
FBgn0033429	75.3872	-1.31067	0.250801	-5.22593	1.73282e-07	3.44882e-06	2R	CG12929
FBgn0039664	85.8908	-1.09746	0.210056	-5.22461	1.74518e-07	3.46669e-06	3R	CG2006
FBgn0033555	558.461	-1.10319	0.211194	-5.2236	1.75476e-07	3.47897e-06	2R	RpS15Ab
FBgn0035754	144.941	-1.18226	0.226484	-5.22003	1.78893e-07	3.53988e-06	3L	MED4
FBgn0037664	22.6089	2.74763	0.526486	5.2188	1.80086e-07	3.55662e-06	3R	CG8420
FBgn0052533	433.504	-0.64954	0.124479	-5.21807	1.80801e-07	3.56386e-06	X	CG32533
FBgn0015359	648.823	-0.554153	0.10636	-5.21019	1.88651e-07	3.71146e-06	3L	CG2034
FBgn0030598	18.9102	-2.95592	0.567755	-5.20632	1.92617e-07	3.78224e-06	X	CG9503
FBgn0010651	1402.78	-1.46156	0.280849	-5.20406	1.94983e-07	3.81408e-06	2R	MFS14
FBgn0034950	76.9774	-1.90321	0.365702	-5.20428	1.94754e-07	3.81408e-06	2R	Pask
FBgn0038275	203.722	-1.05764	0.203598	-5.19477	2.04977e-07	3.99433e-06	3R	CG3817
FBgn0020930	923.789	-0.604806	0.116422	-5.19495	2.04777e-07	3.99433e-06	2R	Dgkepsilon
FBgn0036974	3622.88	-0.635242	0.122307	-5.19384	2.05995e-07	4.00655e-06	3L	eRF1
FBgn0033473	471.922	-0.668701	0.128763	-5.19325	2.06649e-07	4.01166e-06	2R	CG12128
FBgn0039528	1250.72	-0.741912	0.142889	-5.19223	2.07787e-07	4.02611e-06	3R	dsd
FBgn0036500	390.904	-0.822499	0.158543	-5.18787	2.12712e-07	4.11377e-06	3L	CG7275
FBgn0034086	254.576	-0.870245	0.168	-5.18002	2.21867e-07	4.28274e-06	2R	CG8441
FBgn0027291	2539.36	-0.516764	0.0998896	-5.17335	2.2993e-07	4.43005e-06	X	Idh3a
FBgn0039741	417.442	-0.66105	0.127952	-5.16641	2.38639e-07	4.58922e-06	3R	CG7943
FBgn0038269	442.118	-0.639544	0.123865	-5.16322	2.42733e-07	4.6592e-06	3R	Rrp6
FBgn0266005	160.172	-1.3195	0.255594	-5.16249	2.43686e-07	4.66876e-06	X	lncRNA:CR44779
FBgn0030512	408.932	-0.719258	0.13934	-5.16188	2.4448e-07	4.67522e-06	X	Nadsyn
FBgn0020908	66.2663	1.54295	0.298998	5.16039	2.46436e-07	4.70386e-06	2R	Scp1
FBgn0002590	30994.5	-0.493821	0.0957097	-5.15957	2.47524e-07	4.71583e-06	X	RpS5a
FBgn0284246	618.817	-0.97551	0.189105	-5.15858	2.48834e-07	4.73201e-06	2R	l(2)k09848
FBgn0036889	286.904	-0.825276	0.160004	-5.15784	2.49811e-07	4.73302e-06	3L	CG14100
FBgn0035692	648.801	-0.496041	0.0961696	-5.15798	2.49622e-07	4.73302e-06	3L	Sf3b6
FBgn0037490	114.999	-0.991136	0.192212	-5.15648	2.51632e-07	4.75873e-06	3R	CG10053
FBgn0036819	60.6283	-1.33565	0.259046	-5.15603	2.52246e-07	4.76155e-06	3L	Dysb
FBgn0266719	507.916	-0.864028	0.167626	-5.15451	2.54289e-07	4.7913e-06	3R	stac
FBgn0015794	564.38	-0.560329	0.10877	-5.15149	2.58429e-07	4.86036e-06	X	Rab18
FBgn0039017	307.912	-0.724877	0.140863	-5.14595	2.66165e-07	4.99668e-06	3R	CG6985
FBgn0024194	410.071	-0.798162	0.155187	-5.14324	2.70038e-07	5.06013e-06	3L	rasp
FBgn0259697	67.5818	-1.47098	0.286057	-5.14225	2.71468e-07	5.07764e-06	3L	nvd
FBgn0037930	1821.87	-0.879592	0.171091	-5.14109	2.73153e-07	5.09985e-06	3R	CG14715
FBgn0035088	276.963	-0.638455	0.124234	-5.13912	2.76033e-07	5.14424e-06	2R	CG3776
FBgn0026090	323.024	-0.649096	0.126369	-5.1365	2.799e-07	5.20686e-06	X	CG14812
FBgn0031771	1051.38	-0.612802	0.119315	-5.13601	2.8063e-07	5.21098e-06	2L	ND-51
FBgn0026718	208.429	-1.79036	0.348636	-5.13532	2.81665e-07	5.22073e-06	2L	Agpat2
FBgn0028990	335.51	1.01143	0.196994	5.13433	2.83154e-07	5.22943e-06	2L	Spn27A
FBgn0037744	546.812	-0.581815	0.113316	-5.13444	2.8299e-07	5.22943e-06	3R	NA
FBgn0035336	450.844	-0.893776	0.174189	-5.13108	2.88086e-07	5.31093e-06	3L	CG9004
FBgn0020391	188.734	-0.83806	0.163499	-5.1258	2.96284e-07	5.43529e-06	2R	Nrk
FBgn0004463	558.239	-0.511209	0.0997262	-5.12612	2.95767e-07	5.43529e-06	2R	RpIII128
FBgn0031022	342.15	-0.871012	0.16993	-5.12571	2.96422e-07	5.43529e-06	X	CG12204
FBgn0039876	216.087	-0.852034	0.166258	-5.12479	2.97873e-07	5.45215e-06	3R	CG2126
FBgn0034351	180.565	-0.858192	0.167511	-5.12321	3.00384e-07	5.4883e-06	2R	rswl
FBgn0260407	316.079	-0.929146	0.181478	-5.11988	3.05733e-07	5.57608e-06	2L	mRpS23
FBgn0024984	7.10992	-5.20951	1.01928	-5.11096	3.20528e-07	5.83555e-06	X	CG3457
FBgn0052576	253.715	-0.738952	0.144756	-5.10481	3.31125e-07	6.01402e-06	X	CG32576
FBgn0036052	357.789	-0.598598	0.117266	-5.10459	3.31504e-07	6.01402e-06	3L	CG10809
FBgn0039531	117.978	-1.21246	0.23778	-5.09908	3.41316e-07	6.18107e-06	3R	CG5611
FBgn0037377	325.225	-1.08248	0.212402	-5.09639	3.46183e-07	6.25816e-06	3R	CG1218
FBgn0266854	23.0871	2.68307	0.527442	5.08696	3.63856e-07	6.56606e-06	2R	CR45315
FBgn0067629	123.277	-0.972747	0.191241	-5.08649	3.64749e-07	6.57061e-06	3R	CG33332
FBgn0024330	278.395	-0.790278	0.155517	-5.08162	3.7423e-07	6.72957e-06	3R	MED6
FBgn0029785	25882.6	-0.562993	0.110832	-5.0797	3.78032e-07	6.78605e-06	X	RpL35
FBgn0030291	218.534	-1.12047	0.220686	-5.0772	3.83035e-07	6.86382e-06	X	CG1738
FBgn0029713	515.349	-1.08823	0.214402	-5.07568	3.86113e-07	6.9069e-06	X	CG11436
FBgn0029710	74.3846	-1.58444	0.312308	-5.07332	3.90934e-07	6.98096e-06	X	CG3568
FBgn0025383	47.0647	-1.41559	0.279141	-5.07126	3.95196e-07	7.04479e-06	X	CG14780
FBgn0040529	1552.97	-0.83136	0.164249	-5.0616	4.15754e-07	7.3984e-06	3R	COX7A
FBgn0033258	51.6418	-1.32998	0.262786	-5.06109	4.16865e-07	7.40532e-06	2R	CG8712
FBgn0038876	356.875	-0.668981	0.132192	-5.06066	4.17817e-07	7.40939e-06	3R	Idi
FBgn0001942	28469.6	-0.530552	0.104891	-5.05815	4.23342e-07	7.49439e-06	2L	eIF4A
FBgn0038678	186.493	-1.06713	0.211057	-5.05615	4.27816e-07	7.56053e-06	3R	mRpL55
FBgn0022987	929.171	-0.595489	0.11789	-5.05125	4.38928e-07	7.74356e-06	2R	qkr54B
FBgn0037156	250.452	-0.673323	0.133461	-5.04509	4.5331e-07	7.98356e-06	3L	CG11523
FBgn0040207	530.416	-0.611089	0.121269	-5.03913	4.67648e-07	8.22194e-06	X	kat80
FBgn0037305	614.807	-0.674082	0.133835	-5.03665	4.73749e-07	8.31495e-06	3R	CG12173
FBgn0035879	537.268	-0.839861	0.166776	-5.03586	4.75706e-07	8.33502e-06	3L	GAPcenA
FBgn0024807	1769.17	-0.48189	0.0958701	-5.02649	4.99527e-07	8.73746e-06	X	DIP1
FBgn0033351	532.048	-0.597755	0.118935	-5.02589	5.01091e-07	8.74989e-06	2R	AIMP1
FBgn0013732	244.638	-1.0447	0.207928	-5.02436	5.05107e-07	8.80502e-06	2R	sced
FBgn0036871	26.2846	-2.11098	0.420612	-5.01883	5.19877e-07	9.0471e-06	3L	CG14096
FBgn0038387	197.251	-0.794108	0.15833	-5.01553	5.28881e-07	9.18818e-06	3R	blp
FBgn0261285	242.842	-1.03706	0.207155	-5.00619	5.55185e-07	9.61257e-06	3R	Ppcs
FBgn0283535	7992.72	-0.495849	0.0990455	-5.00628	5.54921e-07	9.61257e-06	3R	Vha26
FBgn0031250	224.598	-0.79562	0.158983	-5.00444	5.60236e-07	9.66738e-06	2L	Ent1
FBgn0030791	771.905	-0.692351	0.138339	-5.00476	5.59325e-07	9.66738e-06	X	CG9132
FBgn0000499	838.585	-0.55077	0.110142	-5.00055	5.71658e-07	9.8479e-06	X	dsh
FBgn0036990	425.689	-0.728684	0.145773	-4.99877	5.76966e-07	9.92265e-06	3L	mRpL15
FBgn0283659	190.492	-0.783054	0.156828	-4.99306	5.94286e-07	1.02034e-05	2L	THG
FBgn0032788	32.8711	-2.50311	0.501434	-4.9919	5.97879e-07	1.02479e-05	2L	CG13084
FBgn0259734	671.029	-0.874753	0.17525	-4.99146	5.99244e-07	1.02542e-05	X	Nost
FBgn0034436	601.623	-0.826285	0.165685	-4.98709	6.12957e-07	1.04713e-05	2R	CG11961
FBgn0028530	254.908	-0.678257	0.13616	-4.98131	6.31558e-07	1.07712e-05	2L	mTTF
FBgn0038834	17896.7	-0.515236	0.103528	-4.97679	6.4649e-07	1.10075e-05	3R	RpS30
FBgn0026324	128.947	-0.913608	0.183627	-4.97534	6.5134e-07	1.10717e-05	2L	Taf10b
FBgn0029088	1060.66	-0.58493	0.117725	-4.96861	6.74337e-07	1.14436e-05	3R	disp
FBgn0052343	372.433	-0.709543	0.142913	-4.96485	6.87543e-07	1.16484e-05	3L	Atac3
FBgn0039282	107.76	-1.04649	0.210899	-4.96204	6.97553e-07	1.17617e-05	3R	Bili
FBgn0036862	154.928	-1.268	0.255509	-4.96262	6.95484e-07	1.17617e-05	3L	Gbs-76A
FBgn0052418	228.772	-1.30881	0.263766	-4.96201	6.97671e-07	1.17617e-05	3L	vito
FBgn0040467	56.0787	-1.31431	0.264894	-4.96165	6.98981e-07	1.17645e-05	X	Dlip1
FBgn0031684	339.841	-0.851192	0.17162	-4.95975	7.05831e-07	1.18603e-05	2L	ND-13A
FBgn0083968	206.073	-1.19699	0.241448	-4.95756	7.13822e-07	1.19749e-05	2L	CG34132
FBgn0039305	271.488	-1.09223	0.220575	-4.95174	7.35514e-07	1.23099e-05	3R	CG11858
FBgn0033340	393.076	-0.86558	0.174809	-4.95156	7.36193e-07	1.23099e-05	2R	CG13751
FBgn0038924	293.168	-0.952892	0.19252	-4.94957	7.43773e-07	1.24164e-05	3R	CG6028
FBgn0032453	1406.3	-0.873533	0.176524	-4.94852	7.47793e-07	1.24632e-05	2L	CG6180
FBgn0051457	133.693	-0.791636	0.160015	-4.94726	7.5267e-07	1.25241e-05	3R	CG31457
FBgn0037478	345.386	-0.761576	0.153954	-4.94678	7.54516e-07	1.25345e-05	3R	CG2656
FBgn0034534	261.88	-0.728827	0.147489	-4.94157	7.74968e-07	1.28534e-05	2R	maf-S
FBgn0024889	738.215	-0.653632	0.132331	-4.93937	7.83768e-07	1.29784e-05	3L	Kap-alpha1
FBgn0033551	702.858	-0.524534	0.106306	-4.93419	8.04861e-07	1.33046e-05	2R	CG7222
FBgn0266581	1076.12	-0.878002	0.177953	-4.93389	8.06064e-07	1.33046e-05	3R	pit
FBgn0036571	293.086	-0.780047	0.15812	-4.93326	8.08668e-07	1.33261e-05	3L	Strumpellin
FBgn0039259	234.096	-1.02187	0.207158	-4.9328	8.10585e-07	1.33363e-05	3R	CG11781
FBgn0000115	393.224	-0.730654	0.148135	-4.93235	8.12467e-07	1.33458e-05	3L	Arl1
FBgn0030686	833.944	-0.610641	0.123841	-4.93086	8.18679e-07	1.34263e-05	X	mRpL3
FBgn0038829	745.541	-0.580425	0.117723	-4.93042	8.20545e-07	1.34354e-05	3R	CG17271
FBgn0031307	6483.42	-1.00855	0.204618	-4.92893	8.26817e-07	1.35165e-05	2L	MFS3
FBgn0034073	405.817	-0.701477	0.142466	-4.92382	8.48697e-07	1.38521e-05	2R	CG8414
FBgn0035440	905.181	-0.686342	0.139522	-4.91925	8.68763e-07	1.41571e-05	3L	CG14969
FBgn0033209	394.077	-0.946255	0.192394	-4.91832	8.72903e-07	1.4202e-05	2R	CG12107
FBgn0039291	161.915	-0.881256	0.179303	-4.9149	8.88283e-07	1.44065e-05	3R	CG13663
FBgn0035524	786.423	-0.786616	0.160043	-4.91502	8.87738e-07	1.44065e-05	3L	CG11583
FBgn0037543	130.523	-1.18808	0.241859	-4.91229	9.00176e-07	1.45763e-05	3R	CG10903
FBgn0030876	334.714	1.14506	0.233225	4.90969	9.12217e-07	1.4748e-05	X	CG6762
FBgn0051715	547.147	-0.631518	0.128753	-4.90487	9.34905e-07	1.5091e-05	2L	CG31715
FBgn0034050	283.995	-1.00293	0.205021	-4.89183	9.99007e-07	1.61003e-05	2R	bug
FBgn0034933	219.351	-0.700746	0.143322	-4.88933	1.01182e-06	1.62812e-05	2R	CG3735
FBgn0035421	178.424	-0.827089	0.169191	-4.88848	1.01618e-06	1.63257e-05	3L	nSMase
FBgn0030625	328.07	-0.624014	0.127673	-4.88758	1.02083e-06	1.63748e-05	X	CG5877
FBgn0036258	4207.07	-0.644053	0.131792	-4.88688	1.02444e-06	1.64071e-05	3L	eIF3l
FBgn0051373	53.2792	-2.14568	0.439269	-4.88466	1.03608e-06	1.65418e-05	3R	CG31373
FBgn0036908	588.057	-0.803088	0.164405	-4.8848	1.03534e-06	1.65418e-05	3L	TORIP
FBgn0032752	988.634	-1.17133	0.239977	-4.88098	1.05558e-06	1.68226e-05	2L	CG10702
FBgn0039336	164.76	-0.883106	0.180937	-4.88073	1.05695e-06	1.68226e-05	3R	CG4553
FBgn0038861	155.595	-0.833283	0.170782	-4.87922	1.06508e-06	1.69257e-05	3R	CG7009
FBgn0032400	1151.32	1.47199	0.30171	4.87881	1.06726e-06	1.69341e-05	2L	CG6770
FBgn0032700	386.685	-0.733424	0.150401	-4.87645	1.08012e-06	1.71116e-05	2L	CG10338
FBgn0015781	257.944	-0.816447	0.167447	-4.87584	1.08346e-06	1.71381e-05	3R	P5cr
FBgn0031661	373.908	-0.562137	0.11532	-4.87459	1.09036e-06	1.72206e-05	2L	Gmd
FBgn0037061	276.288	-0.994011	0.203965	-4.87343	1.09674e-06	1.72948e-05	3L	CG12975
FBgn0039464	898.589	-1.37599	0.282663	-4.86793	1.12771e-06	1.77558e-05	3R	CG6330
FBgn0261086	113.493	1.23304	0.253524	4.86361	1.15266e-06	1.81208e-05	3R	Syt14
FBgn0261286	565.935	-0.804334	0.165603	-4.85701	1.19174e-06	1.87065e-05	3R	Mat89Ba
FBgn0039698	257.21	-0.700183	0.144262	-4.85354	1.21275e-06	1.89981e-05	3R	CG7789
FBgn0031500	80.0638	-1.14874	0.236692	-4.85333	1.21402e-06	1.89981e-05	2L	CG17221
FBgn0031244	299.296	-0.665964	0.137268	-4.85157	1.22486e-06	1.91384e-05	2L	CG11601
FBgn0033199	333.723	-0.887922	0.183095	-4.84951	1.23764e-06	1.92794e-05	2R	CG17985
FBgn0035232	1933.68	-0.824248	0.169956	-4.84976	1.23611e-06	1.92794e-05	3L	CG12099
FBgn0011566	126.503	-0.858977	0.177235	-4.84655	1.25628e-06	1.954e-05	X	Smyd3
FBgn0031832	212.688	-0.690764	0.14265	-4.84237	1.28301e-06	1.99255e-05	2L	CG9596
FBgn0040064	502.772	-0.621433	0.128367	-4.84106	1.29146e-06	2.00265e-05	2L	yip2
FBgn0035675	192.303	-0.824894	0.170465	-4.83907	1.3045e-06	2.0198e-05	3L	CG6610
FBgn0029512	958.229	-0.581542	0.120309	-4.83374	1.33993e-06	2.07154e-05	3R	Aos1
FBgn0037340	204.251	-0.896194	0.1855	-4.83123	1.35693e-06	2.09466e-05	3R	CG14671
FBgn0042111	436.186	-0.608526	0.125993	-4.82983	1.36652e-06	2.10628e-05	3R	CG18766
FBgn0029945	54.8183	1.3581	0.281208	4.82952	1.36865e-06	2.1064e-05	X	CG18155
FBgn0037205	634.934	-0.533807	0.110597	-4.82658	1.38895e-06	2.13445e-05	3L	BoYb
FBgn0033557	521.531	-0.92609	0.191909	-4.82567	1.39536e-06	2.14109e-05	2R	CG12325
FBgn0267487	1437.66	-0.408323	0.0846534	-4.82347	1.41083e-06	2.16158e-05	3L	Ptp61F
FBgn0039650	61.0307	-1.2102	0.250958	-4.82233	1.41888e-06	2.16743e-05	3R	Mesh1
FBgn0042135	719.274	-0.977076	0.202603	-4.82262	1.41686e-06	2.16743e-05	2R	Gdap2
FBgn0039731	132.543	-0.977374	0.203088	-4.81257	1.48999e-06	2.2693e-05	3R	Sas-6
FBgn0036090	100.993	-1.10175	0.228925	-4.81273	1.48885e-06	2.2693e-05	3L	CG8009
FBgn0035529	239.54	-0.791433	0.16457	-4.80911	1.51607e-06	2.30559e-05	3L	Fdx2
FBgn0036263	522.229	-0.697369	0.145079	-4.80682	1.53353e-06	2.32869e-05	3L	thoc6
FBgn0038106	529.082	-0.627493	0.130565	-4.80597	1.54004e-06	2.33188e-05	3R	CG7488
FBgn0025574	1077.21	-1.05491	0.219504	-4.80589	1.54066e-06	2.33188e-05	3R	Pli
FBgn0262512	587.68	-0.741948	0.154392	-4.8056	1.54285e-06	2.33188e-05	2R	Vha14-1
FBgn0036820	290.419	-0.636258	0.132406	-4.80536	1.54473e-06	2.33188e-05	3L	Grx1
FBgn0262560	325.005	-0.776173	0.161549	-4.80455	1.55097e-06	2.33786e-05	2R	wcd
FBgn0013334	1346.82	-0.60184	0.125315	-4.80261	1.56607e-06	2.35715e-05	3R	Sap47
FBgn0031640	328.129	-0.710641	0.148073	-4.79926	1.59254e-06	2.39347e-05	2L	Mon1
FBgn0034543	333.146	-0.676683	0.141097	-4.79586	1.61978e-06	2.43086e-05	2R	galla-1
FBgn0037834	2338.67	-0.595014	0.124081	-4.79538	1.6237e-06	2.43317e-05	3R	Art1
FBgn0250874	847.265	-0.937611	0.19568	-4.79156	1.6549e-06	2.47631e-05	X	ttm50
FBgn0031972	318.485	-1.05909	0.221099	-4.79012	1.66683e-06	2.49053e-05	2L	Wwox
FBgn0036396	111.529	-0.846389	0.176708	-4.78976	1.66978e-06	2.4913e-05	3L	CG17359
FBgn0036484	799.152	-0.471367	0.0985141	-4.78477	1.71182e-06	2.55031e-05	3L	Pex3
FBgn0004597	344.836	-0.621086	0.129857	-4.78285	1.72827e-06	2.57109e-05	3R	CycC
FBgn0085192	79.0949	-1.23668	0.25872	-4.77997	1.75321e-06	2.60441e-05	2L	CG34163
FBgn0044511	288.889	-0.816764	0.170966	-4.77735	1.77622e-06	2.63477e-05	3R	mRpS21
FBgn0031842	940.773	-0.458818	0.0960807	-4.77534	1.79407e-06	2.6574e-05	2L	Tango1
FBgn0033471	505.618	-0.784469	0.164334	-4.77362	1.80939e-06	2.67623e-05	2R	CG12134
FBgn0051852	618.299	-0.634676	0.133044	-4.77043	1.83829e-06	2.71505e-05	2L	Tap42
FBgn0041605	2339.97	-0.728859	0.152845	-4.7686	1.85507e-06	2.73589e-05	3R	cpx
FBgn0039158	216.814	-0.700734	0.147004	-4.76676	1.87209e-06	2.75704e-05	3R	TBC1d7
FBgn0046247	401.149	-0.569587	0.119566	-4.76377	1.90006e-06	2.7942e-05	3R	CG5938
FBgn0001125	1982	-0.821611	0.172529	-4.76216	1.91532e-06	2.81262e-05	2L	Got2
FBgn0040786	70.512	-1.06983	0.224794	-4.75915	1.94409e-06	2.85078e-05	3L	CG14104
FBgn0050105	201.08	-0.883941	0.186025	-4.75173	2.0168e-06	2.95317e-05	2R	CG30105
FBgn0031711	345.223	-0.683338	0.143817	-4.75143	2.0198e-06	2.95334e-05	2L	CG6907
FBgn0039757	37190.2	-0.466233	0.0981788	-4.74881	2.04615e-06	2.98761e-05	3R	RpS7
FBgn0051272	356.555	2.07458	0.437211	4.74502	2.08484e-06	3.03977e-05	3R	CG31272
FBgn0033159	1042.02	-1.43034	0.301569	-4.743	2.10573e-06	3.06588e-05	2R	Dscam1
FBgn0039163	712.474	-0.70159	0.147933	-4.74263	2.10963e-06	3.06641e-05	3R	CG5515
FBgn0020372	902.063	1.17088	0.246896	4.74239	2.11208e-06	3.06641e-05	2R	TM4SF
FBgn0038857	330.527	-0.698009	0.147245	-4.74047	2.13228e-06	3.09136e-05	3R	Bdbt
FBgn0040899	180.739	-0.819865	0.173012	-4.73877	2.15022e-06	3.11297e-05	X	CG17776
FBgn0000326	272.071	-0.880813	0.186028	-4.73485	2.19216e-06	3.16766e-05	2R	clt
FBgn0024188	565.899	-0.807291	0.170506	-4.73466	2.19419e-06	3.16766e-05	2R	san
FBgn0032940	794.193	-0.753233	0.159117	-4.73383	2.20327e-06	3.17631e-05	2L	Mondo
FBgn0040227	4806.74	-0.567399	0.119873	-4.73332	2.20879e-06	3.17794e-05	3R	eIF3d1
FBgn0033781	281.696	-0.828939	0.175135	-4.73315	2.2106e-06	3.17794e-05	2R	CG13319
FBgn0019925	1341.37	-0.542164	0.114658	-4.72851	2.26169e-06	3.24683e-05	3R	Surf4
FBgn0025373	2006.52	-1.23689	0.26202	-4.72059	2.3516e-06	3.37118e-05	2R	Fpps
FBgn0030645	41.3143	-1.46199	0.310108	-4.71446	2.42352e-06	3.46469e-05	X	Alg14
FBgn0036932	275.818	-0.635671	0.134834	-4.71445	2.42359e-06	3.46469e-05	3L	CG14184
FBgn0037087	362.066	-0.866348	0.18388	-4.71148	2.45924e-06	3.51076e-05	3L	CG7519
FBgn0036973	158.232	-0.923481	0.196056	-4.7103	2.47358e-06	3.52631e-05	3L	Rbbp5
FBgn0036570	295.429	-0.718091	0.152477	-4.70952	2.48302e-06	3.53486e-05	3L	IntS9
FBgn0033543	56.4348	-1.35652	0.288179	-4.70719	2.5115e-06	3.57043e-05	2R	CG12338
FBgn0265102	43.026	-1.42715	0.30341	-4.7037	2.55493e-06	3.62715e-05	3L	Oseg1
FBgn0011474	883.677	-0.627936	0.133572	-4.70109	2.58776e-06	3.66868e-05	3R	PR-Set7
FBgn0039689	232.988	-0.847232	0.180275	-4.69968	2.60573e-06	3.68606e-05	3R	CIA30
FBgn0085405	168.821	-0.957444	0.203731	-4.69956	2.60721e-06	3.68606e-05	3R	CG34376
FBgn0263605	217.021	-0.850102	0.180939	-4.69827	2.62373e-06	3.7043e-05	3L	l(3)72Dn
FBgn0026060	107.498	-1.04384	0.222289	-4.69585	2.65496e-06	3.7381e-05	X	Mipp2
FBgn0039727	623.05	-0.768907	0.163736	-4.69603	2.65262e-06	3.7381e-05	3R	Vps13B
FBgn0011592	1699.22	-1.17459	0.250179	-4.69501	2.66593e-06	3.74728e-05	2R	fra
FBgn0033166	851.706	-0.516632	0.110044	-4.69479	2.66879e-06	3.74728e-05	2R	Eaf
FBgn0016970	141.395	-0.824678	0.175734	-4.69276	2.69546e-06	3.77954e-05	2R	l(2)k10201
FBgn0034729	11.4081	-4.35193	0.928201	-4.68856	2.75138e-06	3.85268e-05	2R	CG10344
FBgn0031873	131.99	-1.01398	0.216374	-4.68626	2.78249e-06	3.89093e-05	2L	Gas41
FBgn0051712	670.901	-0.564322	0.120647	-4.67746	2.90447e-06	4.05596e-05	2L	CG31712
FBgn0036927	528.727	-0.848156	0.181625	-4.66983	3.01453e-06	4.20393e-05	3L	Gabat
FBgn0262515	2343.27	-0.479732	0.102743	-4.66923	3.02333e-06	4.21048e-05	2R	VhaAC45
FBgn0285948	27762.7	-0.519171	0.111227	-4.66765	3.04658e-06	4.2371e-05	2L	RpL27A
FBgn0036998	233.675	-0.910507	0.195113	-4.66656	3.06291e-06	4.25405e-05	3L	CG5969
FBgn0038039	576.814	-0.689688	0.14784	-4.66509	3.08483e-06	4.27869e-05	3R	CG5196
FBgn0020909	441.71	-0.890551	0.190923	-4.66446	3.09428e-06	4.286e-05	X	Rtc1
FBgn0004867	21702.4	-0.466251	0.0999921	-4.66288	3.1181e-06	4.31316e-05	2L	RpS2
FBgn0033751	1084.67	-0.485451	0.104166	-4.66034	3.15693e-06	4.35738e-05	2R	CG8818
FBgn0261602	46714.2	-0.479814	0.102959	-4.66023	3.15857e-06	4.35738e-05	3L	RpL8
FBgn0036893	267.492	-0.596498	0.128115	-4.65597	3.22455e-06	4.44242e-05	3L	PIG-F
FBgn0037610	280.675	-0.638416	0.137167	-4.65429	3.25103e-06	4.46092e-05	3R	CG8043
FBgn0262714	771.931	-0.519048	0.111509	-4.65476	3.24353e-06	4.46092e-05	3L	Sap130
FBgn0035283	264.326	-0.956376	0.205472	-4.65453	3.24726e-06	4.46092e-05	3L	CG12024
FBgn0053051	155.818	-0.883926	0.189949	-4.65349	3.26362e-06	4.46986e-05	3L	CG33051
FBgn0052076	346.051	-0.630011	0.13539	-4.65332	3.26627e-06	4.46986e-05	3L	Alg10
FBgn0032479	1672.77	-0.815109	0.175242	-4.65134	3.29784e-06	4.50704e-05	2L	CG16974
FBgn0039688	1532.29	1.11396	0.239589	4.64946	3.32806e-06	4.54229e-05	3R	Kul
FBgn0037574	162.332	-0.751159	0.161586	-4.64866	3.34104e-06	4.55e-05	3R	Coq2
FBgn0050394	392.824	-0.680666	0.146425	-4.64856	3.34259e-06	4.55e-05	2R	CG30394
FBgn0039712	681.751	-0.521977	0.11234	-4.6464	3.37774e-06	4.58568e-05	3R	CG15514
FBgn0030930	1389.99	-0.52079	0.112078	-4.64666	3.37349e-06	4.58568e-05	X	Pgant7
FBgn0034959	141.636	-1.07191	0.230888	-4.64254	3.44151e-06	4.66608e-05	2R	Xxylt
FBgn0263772	28.1854	1.87851	0.404705	4.64168	3.45587e-06	4.67935e-05	X	CG43689
FBgn0039132	1065.35	-0.550288	0.118605	-4.63968	3.48949e-06	4.71863e-05	3R	AP-1sigma
FBgn0016691	1630.78	-0.683103	0.147302	-4.63745	3.52742e-06	4.76364e-05	3R	ATPsynO
FBgn0037873	846.687	-0.571643	0.123278	-4.63701	3.53482e-06	4.76735e-05	3R	SdhC
FBgn0033188	4010.21	-1.29757	0.280134	-4.63195	3.6224e-06	4.87906e-05	2R	Drat
FBgn0036537	675.195	-0.620578	0.134172	-4.62523	3.74178e-06	5.03324e-05	3L	CG18081
FBgn0040682	31.4273	1.58055	0.341825	4.62385	3.76676e-06	5.06019e-05	3R	CG14664
FBgn0038672	263.543	-0.672549	0.145473	-4.62321	3.77854e-06	5.06937e-05	3R	CG6005
FBgn0035571	24.2201	-3.18	0.688216	-4.62064	3.82555e-06	5.12574e-05	3L	CG12493
FBgn0042177	800.501	-0.52287	0.113166	-4.62036	3.83066e-06	5.12588e-05	3L	Arts
FBgn0034061	177.101	-0.825739	0.178885	-4.61603	3.91151e-06	5.22725e-05	2R	Ufc1
FBgn0036857	290.747	1.16793	0.253278	4.61124	4.00278e-06	5.34225e-05	3L	Aldh7A1
FBgn0038830	155.47	-0.827393	0.179443	-4.61089	4.00943e-06	5.34417e-05	3R	CG17272
FBgn0036330	78.5567	1.31122	0.284489	4.60905	4.04514e-06	5.38477e-05	3L	CG11263
FBgn0035356	177.2	-0.93864	0.203798	-4.60574	4.10999e-06	5.464e-05	3L	CG16986
FBgn0039360	457.176	-0.536495	0.116545	-4.60331	4.1582e-06	5.52092e-05	3R	CLS
FBgn0003134	1580.12	-0.414597	0.0901247	-4.60025	4.21979e-06	5.59545e-05	3R	Pp1alpha-96A
FBgn0036853	298.722	-0.773923	0.168257	-4.59965	4.23197e-06	5.60435e-05	3L	mRpL21
FBgn0037943	781.945	-0.523192	0.113783	-4.59815	4.26251e-06	5.63752e-05	3R	CG14722
FBgn0031238	151.787	-0.972026	0.211474	-4.59644	4.29778e-06	5.67631e-05	2L	CG3645
FBgn0038922	1142.62	-0.456911	0.099411	-4.59619	4.30292e-06	5.67631e-05	3R	Idh3b
FBgn0035690	396.512	0.602834	0.131184	4.59532	4.32077e-06	5.69253e-05	3L	CG10274
FBgn0004404	4469.9	-0.808064	0.175872	-4.5946	4.33572e-06	5.7049e-05	X	RpS14b
FBgn0029665	121.476	-0.944268	0.205539	-4.59411	4.34605e-06	5.71116e-05	X	CG14270
FBgn0033699	27002.4	-0.499763	0.108847	-4.59143	4.40212e-06	5.77743e-05	2R	RpS11
FBgn0026722	409.52	-0.771148	0.167974	-4.59088	4.41389e-06	5.78548e-05	2R	drosha
FBgn0034537	395.467	-0.546754	0.119103	-4.5906	4.41978e-06	5.78579e-05	2R	DMAP1
FBgn0028473	17761.4	-0.575346	0.12536	-4.58956	4.44179e-06	5.80719e-05	2R	Non1
FBgn0002736	851.348	-0.659328	0.143723	-4.58749	4.48599e-06	5.8575e-05	2R	mago
FBgn0029629	3303.96	-0.61466	0.134022	-4.58624	4.5129e-06	5.88514e-05	X	eIF3g1
FBgn0036301	339.406	-0.841885	0.183603	-4.58535	4.53232e-06	5.90295e-05	3L	CG4069
FBgn0033934	1172.55	-0.453224	0.0988718	-4.58396	4.56251e-06	5.93473e-05	2R	CG17385
FBgn0259221	333.227	-0.895843	0.19549	-4.58255	4.59346e-06	5.96743e-05	2R	ATP8A
FBgn0029906	281.988	-0.776932	0.16961	-4.58069	4.63443e-06	6.01303e-05	X	xit
FBgn0051957	57.1973	-1.23458	0.26962	-4.57896	4.6729e-06	6.05527e-05	2L	CG31957
FBgn0052803	185.698	-0.763902	0.166888	-4.57735	4.70913e-06	6.09451e-05	X	CG32803
FBgn0031768	340.191	-0.543681	0.118815	-4.57585	4.74284e-06	6.1304e-05	2L	CG12393
FBgn0086855	599.293	-0.46054	0.100695	-4.57362	4.79369e-06	6.18832e-05	2L	CG17078
FBgn0031776	458.835	-0.805416	0.176189	-4.57131	4.84691e-06	6.24131e-05	2L	Pfdn1
FBgn0003308	93.9176	-1.48601	0.325056	-4.57155	4.84139e-06	6.24131e-05	3R	ry
FBgn0039505	329.619	-0.735808	0.161086	-4.56779	4.92903e-06	6.33115e-05	3R	CG5934
FBgn0031392	532.457	-0.480427	0.105176	-4.56783	4.92802e-06	6.33115e-05	2L	AIF
FBgn0015834	3098.95	-0.608673	0.133293	-4.56644	4.96065e-06	6.35584e-05	2L	eIF3i
FBgn0026428	298.877	-0.768181	0.16822	-4.56653	4.95855e-06	6.35584e-05	X	HDAC6
FBgn0030700	116.478	-0.809248	0.177284	-4.56471	5.00193e-06	6.40072e-05	X	CG15914
FBgn0025615	795.883	-0.902293	0.19769	-4.56419	5.0143e-06	6.40855e-05	X	Torsin
FBgn0250791	1416.07	-0.473582	0.103796	-4.56264	5.05138e-06	6.4479e-05	3L	alphaSnap
FBgn0031673	987.113	-0.741586	0.162574	-4.56154	5.07809e-06	6.4632e-05	2L	CG31650
FBgn0034237	8828.18	-0.750817	0.16459	-4.56174	5.07306e-06	6.4632e-05	2R	eIF3b
FBgn0034065	186.98	-0.812568	0.178141	-4.56136	5.08228e-06	6.4632e-05	2R	Rrp42
FBgn0032101	310.057	-0.679329	0.148958	-4.56053	5.10242e-06	6.48076e-05	2L	CG9586
FBgn0035603	363.424	-1.04184	0.228691	-4.55565	5.22242e-06	6.62497e-05	3L	Pfdn4
FBgn0029525	393.865	-0.721286	0.158344	-4.55518	5.23412e-06	6.63161e-05	X	CG18273
FBgn0020018	287.579	-0.588656	0.129247	-4.55451	5.2509e-06	6.64466e-05	3R	Ppox
FBgn0026147	861.436	-0.550498	0.120906	-4.5531	5.28599e-06	6.67982e-05	2L	TTLL4A
FBgn0038739	300.415	-0.75156	0.165074	-4.55288	5.29172e-06	6.67982e-05	3R	CG4686
FBgn0052412	11.4191	-2.99061	0.656972	-4.5521	5.31125e-06	6.69622e-05	3L	QC
FBgn0034795	489.499	-0.569837	0.125225	-4.5505	5.35179e-06	6.73905e-05	2R	MED23
FBgn0010770	583.108	-0.777193	0.170826	-4.54961	5.37457e-06	6.75943e-05	3R	ppan
FBgn0037241	944.892	-0.616822	0.13574	-4.54413	5.51621e-06	6.92907e-05	3R	CG14646
FBgn0039965	471.973	-0.700396	0.154171	-4.54298	5.54641e-06	6.95847e-05	X	Coa7
FBgn0267126	20.9215	-1.81012	0.398497	-4.54235	5.56299e-06	6.97073e-05	3R	lncRNA:CR45566
FBgn0034595	52.2118	2.02268	0.445523	4.54001	5.62506e-06	7.03992e-05	2R	CG15657
FBgn0032168	398.084	-0.641594	0.141334	-4.53957	5.63693e-06	7.04616e-05	2L	CG13126
FBgn0010741	1061.12	-0.52928	0.116671	-4.53654	5.71858e-06	7.13952e-05	3L	Pfdn2
FBgn0259112	213.751	-0.909554	0.200548	-4.53535	5.75081e-06	7.17103e-05	2R	asRNA:CR42254
FBgn0030735	609.544	-0.590593	0.130265	-4.53378	5.7936e-06	7.21561e-05	X	CG3632
FBgn0031094	260.87	-0.602503	0.132963	-4.53136	5.86057e-06	7.29015e-05	X	CG9578
FBgn0051716	1273.47	-0.427739	0.0944713	-4.52771	5.96258e-06	7.40806e-05	2L	Cnot4
FBgn0010411	28095.8	-0.486823	0.107547	-4.52662	5.99348e-06	7.43743e-05	2R	RpS18
FBgn0034988	424.936	-0.920612	0.203427	-4.52552	6.0246e-06	7.46701e-05	2R	cN-IIIB
FBgn0025638	1058.78	-0.576099	0.127326	-4.52461	6.05059e-06	7.49016e-05	X	Roc1a
FBgn0038763	418.138	-0.571876	0.126401	-4.5243	6.05961e-06	7.49194e-05	3R	PIG-L
FBgn0026393	89.3003	-0.953547	0.210773	-4.52405	6.06665e-06	7.49194e-05	2R	Or43b
FBgn0034242	421.148	-0.689621	0.152663	-4.51727	6.26431e-06	7.72673e-05	2R	CG14480
FBgn0266723	189.765	-0.794291	0.175925	-4.51493	6.33366e-06	7.80289e-05	2R	Trs31
FBgn0033434	942.331	-0.50977	0.112996	-4.51138	6.44069e-06	7.92522e-05	2R	CG1902
FBgn0036538	529.211	-0.756155	0.167641	-4.51056	6.4656e-06	7.94633e-05	3L	CG15715
FBgn0037652	491.193	-0.715899	0.158744	-4.50976	6.49016e-06	7.96696e-05	3R	CG11980
FBgn0085468	635.826	-0.607498	0.134722	-4.50927	6.50516e-06	7.97583e-05	2R	ND-MWFE
FBgn0038049	1052.08	-0.483612	0.107285	-4.50774	6.55228e-06	8.01442e-05	3R	CG5844
FBgn0039427	666.571	-0.523902	0.116219	-4.50789	6.54741e-06	8.01442e-05	3R	CG5447
FBgn0035236	1006.33	-0.597603	0.132622	-4.50605	6.60456e-06	8.06874e-05	3L	CG12004
FBgn0032925	1083.9	-0.746172	0.16561	-4.50561	6.61814e-06	8.07571e-05	2L	CG9246
FBgn0035321	118.597	-1.65752	0.368088	-4.50306	6.69815e-06	8.16362e-05	3L	CG1275
FBgn0083953	151.149	-1.10433	0.245327	-4.50146	6.74892e-06	8.21573e-05	3R	CG34117
FBgn0033744	58.584	-1.69743	0.377172	-4.50042	6.78205e-06	8.24627e-05	2R	Dh44-R2
FBgn0085242	69.9178	-1.22597	0.272572	-4.49778	6.86661e-06	8.33919e-05	2R	CG34213
FBgn0021979	1152.26	-0.661908	0.147181	-4.49723	6.88453e-06	8.35105e-05	2R	l(2)k09913
FBgn0032346	255.853	-0.903274	0.200903	-4.49606	6.92236e-06	8.38702e-05	2L	Csl4
FBgn0032217	1016.08	-0.656055	0.145941	-4.49535	6.94544e-06	8.40504e-05	2L	CG4972
FBgn0031351	67.2376	-1.03996	0.231404	-4.49412	6.98568e-06	8.44377e-05	2L	CG14352
FBgn0037619	107.157	-0.797717	0.177786	-4.48696	7.22474e-06	8.71637e-05	3R	CG8159
FBgn0033357	903.811	-0.899422	0.200463	-4.48672	7.23278e-06	8.71637e-05	2R	Tom7
FBgn0030801	222.299	-0.668723	0.149049	-4.4866	7.23671e-06	8.71637e-05	X	Rcp
FBgn0004380	311.208	-0.65498	0.146003	-4.48608	7.2544e-06	8.72742e-05	3L	Klp64D
FBgn0036624	895.669	-0.419783	0.0936082	-4.48447	7.30959e-06	8.7835e-05	3L	RAF2
FBgn0052069	89.0127	-1.10874	0.247303	-4.48333	7.34877e-06	8.82024e-05	3L	CG32069
FBgn0023212	1609.71	-0.534729	0.119383	-4.4791	7.49595e-06	8.98637e-05	3R	EloB
FBgn0029711	596.78	-0.666506	0.148825	-4.47845	7.51875e-06	8.99357e-05	X	Usf
FBgn0004629	1882.3	1.5902	0.35508	4.47843	7.5195e-06	8.99357e-05	3R	Cys
FBgn0039130	1064.97	-0.588676	0.131459	-4.47803	7.53339e-06	8.99968e-05	3R	CG5854
FBgn0036405	249.959	-0.931712	0.208298	-4.47298	7.71377e-06	9.20444e-05	3L	CG6833
FBgn0051548	346.269	-0.789325	0.176511	-4.47182	7.75578e-06	9.24381e-05	3R	CG31548
FBgn0266732	32.9525	2.22514	0.497709	4.47076	7.7942e-06	9.27881e-05	3R	asRNA:CR45205
FBgn0023519	252.318	-0.662075	0.148198	-4.46749	7.91436e-06	9.41093e-05	X	mRpL16
FBgn0267408	7701.77	1.37498	0.307995	4.46428	8.03369e-06	9.54175e-05	3R	AOX1
FBgn0030410	67.3612	-1.09549	0.245601	-4.46045	8.17878e-06	9.70283e-05	X	Aven
FBgn0037687	350.551	-0.712667	0.159793	-4.45994	8.19834e-06	9.7148e-05	3R	CG8132
FBgn0032228	322.275	-0.74772	0.167682	-4.45916	8.22813e-06	9.72761e-05	2L	CG5367
FBgn0265180	134.324	-1.14444	0.256647	-4.45918	8.22724e-06	9.72761e-05	2R	CG44245
FBgn0039955	2580.34	-1.02962	0.230991	-4.45741	8.29553e-06	9.79599e-05	3R	CG41099
FBgn0015269	1169.46	-0.481305	0.10799	-4.45693	8.31412e-06	9.80664e-05	3R	Nf1
FBgn0032354	132.283	-0.982471	0.220509	-4.45548	8.37065e-06	9.86197e-05	2L	CG4788
FBgn0029888	515.569	-0.520067	0.116749	-4.45457	8.40632e-06	9.89262e-05	X	ND-ASHI
FBgn0025683	1971.02	-0.772189	0.173363	-4.45417	8.42184e-06	9.89953e-05	2L	CG3164
FBgn0034313	698.009	-0.464171	0.104247	-4.4526	8.48353e-06	9.94922e-05	2R	CG5726
FBgn0033178	458.244	-0.753193	0.16915	-4.45282	8.47503e-06	9.94922e-05	2R	CG11127
FBgn0033104	232.925	-0.593704	0.133436	-4.44935	8.61296e-06	0.000100895	2R	CG15237
FBgn0039765	91.8651	-1.02368	0.230126	-4.44834	8.65355e-06	0.000101168	3R	mRpS18C
FBgn0039942	94.4875	-0.912243	0.205078	-4.44828	8.65606e-06	0.000101168	X	CG17163
FBgn0029874	310.494	-0.678967	0.152669	-4.4473	8.69558e-06	0.000101514	X	CG3342
FBgn0051229	228.032	-0.862484	0.194127	-4.4429	8.87558e-06	0.00010338	3R	CG31229
FBgn0030974	1085.66	-0.442913	0.0996883	-4.44298	8.87222e-06	0.00010338	X	Flacc
FBgn0052274	15.6059	4.1828	0.941879	4.44092	8.95767e-06	0.000104218	3L	Drsl1
FBgn0031479	292.393	-0.782765	0.176275	-4.44059	8.97122e-06	0.000104257	2L	Prx6005
FBgn0033349	1774.89	-0.439203	0.0989337	-4.43937	9.02221e-06	0.000104731	2R	CG8243
FBgn0038166	376.683	-0.720823	0.16245	-4.43721	9.11328e-06	0.000105669	3R	CG9588
FBgn0265058	124.038	-0.925438	0.208609	-4.43622	9.15506e-06	0.000106033	2R	asRNA:CR44169
FBgn0013303	537.496	-0.735829	0.165881	-4.43589	9.16932e-06	0.000106078	3L	Nca
FBgn0030697	57.4937	1.85921	0.419202	4.43513	9.20184e-06	0.000106335	X	CG8565
FBgn0027582	2093.65	-0.641507	0.144757	-4.4316	9.35359e-06	0.000107967	2L	CG6230
FBgn0039857	26834.6	-0.460863	0.104078	-4.42804	9.50948e-06	0.000109643	3R	RpL6
FBgn0261363	286.856	-1.46371	0.330691	-4.42622	9.58998e-06	0.000110446	2R	PPO3
FBgn0036754	334.414	-0.698954	0.157927	-4.42581	9.60807e-06	0.00011053	3L	CG5589
FBgn0036999	217.652	-0.90107	0.203611	-4.42545	9.62435e-06	0.000110594	3L	isoQC
FBgn0032811	365.024	-0.692644	0.156523	-4.42518	9.63624e-06	0.000110606	2L	CG10268
FBgn0036462	1159.72	-0.481351	0.108784	-4.42482	9.65214e-06	0.000110665	3L	mRpL39
FBgn0037779	434.454	-0.831555	0.187954	-4.42426	9.67744e-06	0.000110831	3R	CG12811
FBgn0046294	16.9158	4.2031	0.950872	4.42026	9.85824e-06	0.000112776	2R	CG12699
FBgn0029708	55.0004	2.67321	0.605087	4.41789	9.96696e-06	0.000113892	X	CG3556
FBgn0266518	1130.35	0.446142	0.100993	4.41754	9.9832e-06	0.000113951	2R	Dpit47
FBgn0030208	883.283	-0.573483	0.129829	-4.41721	9.9985e-06	0.000113999	X	PPP4R2r
FBgn0038832	156.691	2.39528	0.542429	4.41583	1.00621e-05	0.000114596	3R	CG15695
FBgn0266724	162.434	-0.704944	0.159692	-4.41441	1.01284e-05	0.000115223	3L	Trs20
FBgn0026761	1781.21	-0.577219	0.130768	-4.41406	1.01452e-05	0.000115286	2R	Trap1
FBgn0046296	158.771	-0.819752	0.185759	-4.41298	1.01956e-05	0.000115731	3L	CG11534
FBgn0000394	405.944	-0.861017	0.19515	-4.41208	1.02381e-05	0.000116085	X	cv
FBgn0037215	1661.52	-0.729014	0.165288	-4.41057	1.03098e-05	0.000116768	3R	beta-Man
FBgn0261597	36305.5	-0.382936	0.0868603	-4.40865	1.04019e-05	0.000117682	2L	RpS26
FBgn0037018	253.558	-0.590289	0.133945	-4.40695	1.04837e-05	0.000118476	3L	CG4042
FBgn0031040	243.751	-1.02847	0.23339	-4.40663	1.04992e-05	0.000118521	X	CG14210
FBgn0038224	1730.67	-0.632274	0.143589	-4.40335	1.0659e-05	0.000120192	3R	ATPsynE
FBgn0031645	127.607	1.28093	0.290918	4.40307	1.06731e-05	0.000120219	2L	CG3036
FBgn0266667	332.028	-0.602374	0.136818	-4.40275	1.06888e-05	0.000120264	3L	Exo70
FBgn0036728	979.807	-0.620153	0.140911	-4.40102	1.07745e-05	0.000121095	3L	UQCR-Q
FBgn0261261	429.209	-0.963706	0.219065	-4.39918	1.08663e-05	0.000121993	3R	plx
FBgn0015037	175.972	1.96498	0.446867	4.39724	1.09638e-05	0.000122953	2R	Cyp4p1
FBgn0035760	58.2275	-1.34546	0.30601	-4.39677	1.09875e-05	0.000123084	3L	CG8607
FBgn0040931	485.019	-0.591555	0.134589	-4.39527	1.10637e-05	0.000123802	X	CG9034
FBgn0037849	54.2191	1.75328	0.398933	4.39493	1.10809e-05	0.000123859	3R	CG4596
FBgn0036579	197.019	-0.681364	0.155145	-4.3918	1.12417e-05	0.00012552	3L	CG5027
FBgn0013773	378.664	-0.729893	0.166243	-4.39052	1.13077e-05	0.00012612	2R	Cyp6a22
FBgn0002641	791.039	-0.467726	0.106544	-4.38996	1.13372e-05	0.000126311	X	mal
FBgn0031603	74.6751	-1.05838	0.241152	-4.38884	1.13955e-05	0.000126822	2L	CG15432
FBgn0052944	198.896	0.731876	0.166864	4.38607	1.1542e-05	0.000128313	3R	CG32944
FBgn0004855	406.485	-0.521815	0.119027	-4.384	1.16522e-05	0.000129399	3R	RpII15
FBgn0034430	835.741	-0.612963	0.139871	-4.38236	1.17403e-05	0.000130236	2R	mip40
FBgn0033485	794.779	-1.08893	0.248522	-4.38162	1.178e-05	0.000130536	2R	RpLP0-like
FBgn0037792	455.933	-0.649692	0.148402	-4.37791	1.19826e-05	0.000132636	3R	TAF1B
FBgn0032986	901.498	-0.857279	0.195855	-4.3771	1.20267e-05	0.000132981	2L	CG3262
FBgn0035148	305.737	-0.70336	0.160708	-4.37662	1.20532e-05	0.000133131	3L	CG3402
FBgn0037583	892.998	-0.57184	0.130703	-4.3751	1.21374e-05	0.000133917	3R	CG9684
FBgn0035064	251.449	-0.711833	0.162863	-4.37074	1.23828e-05	0.000136477	2R	TyrRS-m
FBgn0284251	1054.72	-0.627587	0.143701	-4.3673	1.2579e-05	0.000138491	2L	l(2)05287
FBgn0034361	199.99	-0.72908	0.167063	-4.36409	1.27654e-05	0.000140392	2R	mRpS28
FBgn0030699	709.339	-0.470963	0.107929	-4.36366	1.27907e-05	0.00014052	X	CG8578
FBgn0040575	124.156	-0.876987	0.201084	-4.3613	1.29294e-05	0.000141892	3R	CG15922
FBgn0039870	362.048	-0.698611	0.160236	-4.35988	1.30131e-05	0.000142657	3R	CG1896
FBgn0025809	336.992	-0.637434	0.146285	-4.3575	1.31559e-05	0.000144068	X	Paf-AHalpha
FBgn0039713	43909.7	-0.488429	0.112103	-4.35696	1.31884e-05	0.000144271	3R	RpS8
FBgn0040351	57.1202	1.56087	0.358365	4.35553	1.32743e-05	0.000145055	X	CG11638
FBgn0041174	169.352	-0.992524	0.227952	-4.35409	1.33622e-05	0.00014586	2R	Vhl
FBgn0033341	210.96	-0.950294	0.21844	-4.35037	1.35906e-05	0.000148195	2R	MrgBP
FBgn0032391	178.801	-0.787159	0.180959	-4.34994	1.36176e-05	0.000148332	2L	escl
FBgn0025808	174.835	-0.783445	0.180162	-4.34855	1.37041e-05	0.000149116	3R	Rad17
FBgn0262166	211.034	-0.648738	0.149244	-4.34683	1.38118e-05	0.000150129	2R	calypso
FBgn0035311	155.601	1.24422	0.286268	4.34633	1.38436e-05	0.000150315	3L	CR15821
FBgn0033754	119.493	-0.957625	0.220446	-4.34403	1.39895e-05	0.000151738	2R	Ak6
FBgn0033550	171.442	-0.889347	0.204868	-4.34108	1.41786e-05	0.000153465	2R	CG12341
FBgn0031114	850.104	0.608166	0.140089	4.3413	1.41644e-05	0.000153465	X	cactin
FBgn0033092	150.612	-1.09588	0.252527	-4.33965	1.42711e-05	0.000154263	2R	CG9422
FBgn0033187	387.39	-0.775751	0.178766	-4.33947	1.42825e-05	0.000154263	2R	PIG-G
FBgn0030572	314.247	-0.671981	0.154908	-4.33793	1.43832e-05	0.000155187	X	mRpS25
FBgn0260972	536.868	-0.455557	0.105067	-4.33589	1.45175e-05	0.000156471	2R	alc
FBgn0015805	2147.66	-0.59347	0.136953	-4.33338	1.46838e-05	0.000158098	3L	HDAC1
FBgn0036316	1203.6	-1.18865	0.274408	-4.33168	1.47977e-05	0.000159157	3L	CG10960
FBgn0283658	2036.64	-0.629234	0.145284	-4.33106	1.48393e-05	0.000159437	2L	muc
FBgn0004908	182.737	-0.769219	0.177632	-4.33042	1.48828e-05	0.000159737	3R	Arl2
FBgn0035435	41.8682	-1.40873	0.325395	-4.32929	1.49588e-05	0.000160384	3L	PIG-C
FBgn0027950	250.069	-0.560806	0.129606	-4.32701	1.51148e-05	0.000161888	3R	MBD-like
FBgn0037734	545.705	-0.484489	0.111975	-4.32677	1.51315e-05	0.000161897	3R	trbd
FBgn0052856	85.7393	-0.934611	0.21607	-4.32549	1.5219e-05	0.000162325	3R	CG32856
FBgn0035083	1878.16	-0.744509	0.172114	-4.32568	1.52064e-05	0.000162325	2R	Tina-1
FBgn0030996	1327.37	-0.528578	0.122188	-4.32592	1.51894e-05	0.000162325	X	CG14194
FBgn0039557	302.68	-0.629572	0.145712	-4.32066	1.5556e-05	0.000165748	3R	CG12259
FBgn0037342	273.835	-0.761645	0.176367	-4.31852	1.57081e-05	0.000167194	3R	CG2931
FBgn0010421	349.551	-0.654541	0.151658	-4.31591	1.58949e-05	0.000169008	3R	TfIIFbeta
FBgn0028577	2217.37	-0.669387	0.155188	-4.31341	1.60758e-05	0.000170753	3L	hfp
FBgn0010409	28840.7	-0.401623	0.0931217	-4.31289	1.61138e-05	0.000170803	2R	RpL18A
FBgn0029121	111.724	-1.05685	0.245038	-4.31298	1.61066e-05	0.000170803	3L	Sras
FBgn0038454	204.608	-0.695896	0.161403	-4.31154	1.62121e-05	0.000171667	3R	CG10324
FBgn0032724	495.361	-0.596886	0.138462	-4.31084	1.62634e-05	0.000172033	2L	CG10428
FBgn0025457	897.531	-0.683383	0.158552	-4.31014	1.63149e-05	0.000172399	3R	Bub3
FBgn0026374	1350.93	-0.576746	0.133845	-4.30907	1.63946e-05	0.000173063	X	Rhp
FBgn0026598	340.328	-0.892735	0.207309	-4.30629	1.66015e-05	0.000175067	3R	Apc2
FBgn0036145	405.587	1.00191	0.232789	4.30395	1.67783e-05	0.000176749	3L	CG7607
FBgn0032242	1673.99	-0.466599	0.108441	-4.30279	1.68659e-05	0.00017749	2L	CG5355
FBgn0002791	471.727	-0.476979	0.110972	-4.29818	1.72204e-05	0.000181035	2R	mr
FBgn0033235	1088.61	-0.660191	0.15367	-4.29616	1.73783e-05	0.000182508	2R	CG8728
FBgn0000116	67.199	-1.28611	0.299391	-4.29575	1.74101e-05	0.000182654	3L	Argk
FBgn0037031	283.568	-0.649845	0.151409	-4.29199	1.77077e-05	0.000185587	3L	CG11456
FBgn0030010	83.9153	-1.01609	0.236779	-4.29129	1.77639e-05	0.000185985	X	CG10959
FBgn0266621	11.9053	2.6667	0.62161	4.28998	1.78689e-05	0.000186894	2R	lncRNA:CR45128
FBgn0033195	109.846	-0.765633	0.178588	-4.28715	1.80978e-05	0.000189095	2R	CG1360
FBgn0030451	63.6641	-0.993907	0.231888	-4.28615	1.81796e-05	0.000189756	X	CG15717
FBgn0027556	809.177	-1.62235	0.378576	-4.2854	1.82411e-05	0.000190041	X	CG4928
FBgn0052095	183.3	-0.851858	0.198783	-4.28536	1.8244e-05	0.000190041	3L	CG32095
FBgn0030011	57.6345	-1.12163	0.26176	-4.28497	1.82764e-05	0.000190186	X	Gbeta5
FBgn0031834	107.931	-0.814067	0.190033	-4.28382	1.83709e-05	0.000190975	2L	CG13766
FBgn0037313	903.943	-0.543531	0.126924	-4.28234	1.84941e-05	0.000191867	3R	CG1161
FBgn0261380	560.004	-0.479863	0.112054	-4.28244	1.84851e-05	0.000191867	3R	mRpL37
FBgn0030082	974.67	-0.641481	0.149953	-4.27789	1.88675e-05	0.000195543	X	HP1b
FBgn0035838	111.749	-0.778338	0.181973	-4.27721	1.8925e-05	0.000195941	3L	ldbr
FBgn0030240	478.516	-0.556663	0.130294	-4.27235	1.93425e-05	0.000200061	X	CG2202
FBgn0001229	80.9227	1.70364	0.398852	4.27135	1.94291e-05	0.000200755	3L	Hsp67Bc
FBgn0085292	38.6602	1.58396	0.370883	4.27078	1.94789e-05	0.000201066	3L	CG34263
FBgn0036887	672.829	-0.584145	0.136987	-4.26423	2.00595e-05	0.000206851	3L	CG9231
FBgn0030435	327.926	-0.630567	0.147901	-4.26343	2.0131e-05	0.000207379	X	CG4645
FBgn0036406	90.2078	-0.920273	0.215881	-4.26288	2.01808e-05	0.000207684	3L	CG13484
FBgn0035639	702.658	-0.562989	0.132284	-4.2559	2.08208e-05	0.000214056	3L	kri
FBgn0032006	7970.36	-0.801916	0.188477	-4.25472	2.09312e-05	0.000214974	2L	Pvr
FBgn0263351	1379.43	-0.437151	0.102783	-4.25314	2.10798e-05	0.000216285	3R	AP-2mu
FBgn0034503	449.365	-0.764066	0.179669	-4.25264	2.11266e-05	0.000216548	2R	MED8
FBgn0037720	1180.29	-0.956998	0.22522	-4.24918	2.14557e-05	0.000219701	3R	CG8312
FBgn0023529	2664.95	0.440215	0.103615	4.24856	2.15147e-05	0.000220085	X	CG2918
FBgn0037899	2425.91	-0.582306	0.137112	-4.24693	2.16717e-05	0.00022147	3R	RpL24-like
FBgn0042138	894.575	-0.447651	0.105469	-4.24438	2.19197e-05	0.000223782	3L	CG18815
FBgn0039349	829.578	-0.66651	0.157109	-4.24235	2.21193e-05	0.000225595	3R	Ssadh
[truncated: 9,245 more rows]

## Sheet: res.Tip60-Control
	baseMean	log2FoldChange	lfcSE	stat	pvalue	padj	chr	symbol
[truncated: 10,250 more rows]

[truncated: 1 more sheets: res.DomA-DomB]
